# Supplementary material for: In-Depth Analysis of the Pancreatic Extracellular Matrix during Development for Next-Generation Tissue Engineering
Source: Int J Mol Sci. 2023 Jun 17;24(12):10268. doi: 10.3390/ijms241210268 (PMC10299253; doi:10.3390/ijms241210268)
Supplement: Supplementary file 1 [file ijms-24-10268-s001.zip › Excel File 1.xlsx]

## Sheet: AUC
EntrezGeneSymbol.y	N LOG 2 AUC E14,5 A	N LOG 2 AUC E14,5 B	N LOG 2 AUC E14,5 C	N LOG 2 AUC P1 A	N LOG 2 AUC P1 B	N LOG 2 AUC P1 C	Category	Division	logFC	AveExpr	t	P.Value	adj.P.Val	B
Cela2a	25.9279	26.3107	25.9312	34.6461	34.1104	33.8882	ECM Regulators	Matrisome-associated	8.15832	30.1357	22.8761	3.42606e-07	0.000797586	6.17842		Matrisome associated
Anxa5	28.6441	28.436	28.4437	33.3761	33.0411	32.5294	ECM-affiliated Proteins	Matrisome-associated	4.47425	30.7451	12.7992	1.14412e-05	0.00387797	3.93336		Core Matrisome
Cela3b	24.3419	25.1608	25.3636	35.3517	33.0204	33.6202	ECM Regulators	Matrisome-associated	9.04196	29.4765	13.4787	8.40056e-06	0.00387797	4.1748		adj p value under 0,05
Anxa4	27.6172	27.9569	28.0524	31.2856	31.578	31.2244	ECM-affiliated Proteins	Matrisome-associated	3.48717	29.6191	10.7657	3.1901e-05	0.00663951	3.07946
Prss3	25.2299	26.0955	25.5597	34.5916	32.7425	31.9423	ECM Regulators	Matrisome-associated	7.46376	29.3603	10.7379	3.23895e-05	0.00663951	3.06624
Anxa2	28.7095	28.5146	28.5207	31.7497	31.6677	31.6082	ECM-affiliated Proteins	Matrisome-associated	3.09362	30.1284	10.1972	4.38669e-05	0.00699024	2.79917
Try10	25.5651	26.0719	25.7804	32.7188	31.0058	30.7597	ECM Regulators	Matrisome-associated	5.68896	28.6503	10.0236	4.85021e-05	0.00699024	2.70943
Try5	27.0127	27.4927	27.2513	33.3727	32.0549	31.7558	ECM Regulators	Matrisome-associated	5.14224	29.8234	10.3838	3.94446e-05	0.00699024	2.89341
Anxa3	25.5172	26.3068	26.4214	29.6441	30.2757	29.536	ECM-affiliated Proteins	Matrisome-associated	3.73679	27.9502	9.37993	7.14008e-05	0.0073876	2.35818
Cela1	23.6946	26.5729	26.4986	33.3386	33.0506	32.5436	ECM Regulators	Matrisome-associated	7.38886	29.2831	9.21575	7.90995e-05	0.00753472	2.26371
Tgm2	25.5413	25.4957	25.4976	28.2945	28.6112	28.237	ECM Regulators	Matrisome-associated	2.86939	26.9462	9.2118	7.92959e-05	0.00753472	2.26142
Lgals8	18.6276	18.5976	18.0485	22.3661	24.3014	22.7246	ECM-affiliated Proteins	Matrisome-associated	4.70613	20.7776	8.67626	0.000112041	0.0081154	1.93821
Plod3	23.5345	24.462	24.3894	20.8098	21.0904	20.7218	ECM Regulators	Matrisome-associated	-3.25462	22.5013	-8.63756	0.000114957	0.0081154	1.91393
Gpc1	25.7204	25.8389	25.916	23.3689	23.5627	23.7218	ECM-affiliated Proteins	Matrisome-associated	-2.27395	24.6881	-7.35415	0.000286577	0.0128015	1.03063
Clec2d	18.5073	19.06	18.862	22.7075	22.1581	24.5396	ECM-affiliated Proteins	Matrisome-associated	4.32528	20.9724	6.94851	0.000393219	0.0135171	0.71656
Serpinf2	22.762	22.7957	22.9656	24.9616	24.8933	25.8696	ECM Regulators	Matrisome-associated	2.40045	24.0413	6.38255	0.000627297	0.0165948	0.246502
Anxa13	22.1252	23.2792	23.1987	25.2046	27.0676	26.31	ECM-affiliated Proteins	Matrisome-associated	3.32637	24.5309	6.23444	0.000712625	0.0177432	0.116964
Anxa6	29.9336	29.8194	29.9019	31.8398	31.9379	31.4408	ECM-affiliated Proteins	Matrisome-associated	1.85456	30.8122	5.77674	0.00107291	0.0208144	-0.301607
Anxa11	24.2749	24.9727	25.1	26.3341	27.3245	27.3668	ECM-affiliated Proteins	Matrisome-associated	2.22594	25.8955	5.41076	0.00151432	0.0240638	-0.657185
Lgals9	20.0159	22.0027	21.8513	23.67	24.9292	24.4549	ECM-affiliated Proteins	Matrisome-associated	3.06139	22.8206	5.26333	0.00174794	0.0255826	-0.805925
Kng1	20.6844	20.9213	20.6963	24.3616	22.5452	24.8263	ECM Regulators	Matrisome-associated	3.14371	22.3392	5.18628	0.00188612	0.0258161	-0.884951
Serpina1b	24.4391	24.4456	24.4034	26.1179	27.8687	28.368	ECM Regulators	Matrisome-associated	3.0222	25.9404	5.15209	0.00195136	0.0260331	-0.920306
Prss2	22.4303	25.8235	25.6012	33.1197	29.9665	30.0266	ECM Regulators	Matrisome-associated	6.41926	27.828	5.11836	0.00201825	0.0265451	-0.955363
Anxa1	22.8469	24.1531	24.0752	25.6609	28.6037	27.9365	ECM-affiliated Proteins	Matrisome-associated	3.70866	25.546	5.04012	0.0021836	0.027257	-1.03734
Serpini2	24.115	27.0243	26.2914	30.325	29.1237	28.9871	ECM Regulators	Matrisome-associated	3.66834	27.6444	4.45851	0.00402526	0.0356304	-1.67672
Plxdc2	22.2363	22.0809	22.3646	16.7234	17.8646	20.5024	ECM-affiliated Proteins	Matrisome-associated	-3.8638	20.2953	-4.42314	0.00418428	0.0358785	-1.71735
Anxa7	25.1186	25.2705	25.1461	29.4871	27.2656	27.0046	ECM-affiliated Proteins	Matrisome-associated	2.7407	26.5487	4.16557	0.00557901	0.0414288	-2.01924
S100a9	NA	22.4709	21.0042	NA	25.9806	24.7939	Secreted Factors	Matrisome-associated	3.64972	23.5624	5.21328	0.0057981	0.0417248	-1.62486
Serpinh1	30.234	30.4014	30.3653	29.0751	29.4828	28.8347	ECM Regulators	Matrisome-associated	-1.2027	29.7322	-3.63298	0.0104403	0.0584257	-2.67723
F2	NA	20.4746	21.0767	NA	22.8033	24.11	ECM Regulators	Matrisome-associated	2.68098	22.1162	4.36737	0.0109974	0.0599667	-2.28932
Serpina1a	22.2751	22.5158	22.4978	23.5292	23.7709	23.2754	ECM Regulators	Matrisome-associated	1.0956	22.9774	3.40252	0.013878	0.0681246	-2.97548
Serpinb1a	23.6021	23.9396	23.864	26.3729	24.6828	25.2195	ECM Regulators	Matrisome-associated	1.6232	24.6135	3.30554	0.0156817	0.0736231	-3.10326
Mmp14	NA	22.1635	22.102	NA	24.5601	23.7413	ECM Regulators	Matrisome-associated	2.01796	23.1417	3.92296	0.0159625	0.0744703	-2.68435
Serpina1d	17.4774	21.3052	20.5821	22.9692	22.4389	22.5384	ECM Regulators	Matrisome-associated	2.86056	21.2185	3.02389	0.0225384	0.0893095	-3.48125
A2m	25.3753	19.9848	20.1255	26.394	25.1972	25.5331	ECM Regulators	Matrisome-associated	3.87954	23.7683	2.93698	0.025265	0.0951729	-3.59973
Ngly1	20.8308	21.2522	22.0178	20.0781	18.9607	20.6006	ECM Regulators	Matrisome-associated	-1.48717	20.6234	-2.88198	0.0271729	0.0995413	-3.6751
Plxna3	NA	18.7127	19.1441	NA	17.554	16.9506	ECM-affiliated Proteins	Matrisome-associated	-1.67613	18.0903	-3.26139	0.0293228	0.10487	-3.33647
F13a1	22.9281	23.0769	23.2657	23.7135	25.8792	28.578	ECM Regulators	Matrisome-associated	2.96666	24.5736	2.77306	0.0314236	0.109104	-3.82516
Ctsa	23.4942	23.766	23.3939	24.4249	25.0935	24.1559	ECM Regulators	Matrisome-associated	1.00673	24.0547	2.77129	0.0314982	0.109119	-3.8276
Plxnb2	25.5761	26.4166	26.1857	26.4109	27.6021	27.0388	ECM-affiliated Proteins	Matrisome-associated	0.957826	26.5384	2.31953	0.0583866	0.162491	-4.45673
Gpc3	25.4033	26.0446	26.2465	32.8559	26.9521	27.7907	ECM-affiliated Proteins	Matrisome-associated	3.30145	27.5489	2.29515	0.0603956	0.166392	-4.49074
Mdk	NA	17.744	17.7516	NA	19.4627	NA	Secreted Factors	Matrisome-associated	1.71569	18.3194	2.73923	0.0674092	0.176657	-3.89864
Cspg4	24.8117	25.6324	25.5493	24.684	24.6239	24.3798	ECM-affiliated Proteins	Matrisome-associated	-0.76854	24.9468	-2.09864	0.0794331	0.196043	-4.76391
Adam10	24.894	24.4082	24.3145	24.5265	22.9755	23.2381	ECM Regulators	Matrisome-associated	-0.958897	24.0594	-2.06825	0.0828842	0.201071	-4.8059
Lgals1	26.7836	26.5858	26.4364	26.7529	24.9166	24.6389	ECM-affiliated Proteins	Matrisome-associated	-1.16575	26.019	-2.05653	0.0842545	0.202733	-4.82206
Ctsd	24.2062	25.4681	24.926	25.0092	26.5833	30.5759	ECM Regulators	Matrisome-associated	2.5227	26.1281	1.98623	0.0929733	0.218077	-4.91869
S100a10	22.9199	23.7442	23.5874	25.188	24.346	23.6628	Secreted Factors	Matrisome-associated	0.981821	23.9081	1.96819	0.0953531	0.221381	-4.94338
Plg	20.6898	23.2703	22.9833	23.436	24.067	23.4095	ECM Regulators	Matrisome-associated	1.32302	22.976	1.95625	0.0969625	0.223538	-4.9597
Cstb	NA	23.7201	23.6549	NA	24.8587	24.3728	ECM Regulators	Matrisome-associated	0.928272	24.1516	1.97205	0.117179	0.252586	-4.80978
Ambp	22.5906	22.9033	22.929	22.3409	25.1309	24.7731	ECM Regulators	Matrisome-associated	1.27401	23.4446	1.81123	0.118799	0.25584	-5.15598
Frem2	26.2936	27.6833	28.0439	27.4312	30.3396	28.1777	ECM-affiliated Proteins	Matrisome-associated	1.3092	27.9949	1.68209	0.142265	0.285543	-5.32703
Lepre1	24.4209	23.7302	23.7432	22.768	23.8735	23.1402	ECM Regulators	Matrisome-associated	-0.704211	23.6127	-1.62805	0.153362	0.300009	-5.39731
Serpina1e	20.6697	21.7471	21.0373	23.3899	29.4568	20.2843	ECM Regulators	Matrisome-associated	3.22566	22.7642	1.62134	0.154794	0.301817	-5.40597
St14	22.5382	23.3676	23.2285	22.767	22.6751	21.3074	ECM Regulators	Matrisome-associated	-0.794924	22.6473	-1.56814	0.166627	0.316918	-5.47417
Lman1	26.9103	27.4253	27.403	27.5824	25.4728	25.9553	ECM-affiliated Proteins	Matrisome-associated	-0.909361	26.7915	-1.53988	0.173253	0.321398	-5.51001
Sdc1	21.7676	20.5903	21.4225	17.392	21.9302	20.0634	ECM-affiliated Proteins	Matrisome-associated	-1.46491	20.5277	-1.34193	0.226975	0.38254	-5.75239
Cst3	22.8352	23.0971	23.113	26.1516	22.9111	23.2323	ECM Regulators	Matrisome-associated	1.08326	23.5567	1.30223	0.239413	0.396552	-5.79891
Sdc4	21.6689	22.1999	22.5011	20.1256	21.4915	22.5343	ECM-affiliated Proteins	Matrisome-associated	-0.739506	21.7535	-1.24778	0.257456	0.41551	-5.86145
Serpinf1	22.1096	22.7112	22.6641	21.5639	22.4907	22.1086	ECM Regulators	Matrisome-associated	-0.440588	22.2747	-1.18214	0.280771	0.441348	-5.93472
Serpine2	20.3049	23.7313	23.7878	NA	22.1667	20.9619	ECM Regulators	Matrisome-associated	-1.26482	22.1905	-1.12305	0.310945	0.472045	-5.88702
Gpc4	24.7281	23.8254	23.3397	22.8119	24.5173	22.6602	ECM-affiliated Proteins	Matrisome-associated	-0.634571	23.6471	-1.03264	0.340605	0.501061	-6.09197
Anxa6	29.9336	24.1007	24.5036	31.8398	18.0206	18.7644	ECM-affiliated Proteins	Matrisome-associated	-3.30437	24.5271	-0.986368	0.361103	0.518806	-6.13768
Serpina6	24.5311	24.8767	24.721	25.479	25.2818	24.4859	ECM Regulators	Matrisome-associated	0.372655	24.8959	0.973365	0.367035	0.525982	-6.15025
Ctsb	23.969	24.0563	24.3236	23.7084	25.167	20.5636	ECM Regulators	Matrisome-associated	-0.969999	23.6313	-0.913898	0.395138	0.555388	-6.20617
Gpc6	23.973	25.6317	26.443	NA	26.633	25.742	ECM-affiliated Proteins	Matrisome-associated	0.706136	25.6845	0.897119	0.409564	0.568216	-6.10862
Leprel2	22.554	23.4183	23.3653	22.631	23.3827	24.8516	ECM Regulators	Matrisome-associated	0.509232	23.3672	0.878414	0.412673	0.571336	-6.23827
Ogfod1	16.8274	19.7506	19.654	15.2045	16.0161	21.3083	ECM Regulators	Matrisome-associated	-1.23439	18.1268	-0.802957	0.451865	0.606447	-6.3032
Plxnd1	20.953	21.4415	21.746	19.9505	23.0809	22.7596	ECM-affiliated Proteins	Matrisome-associated	0.550204	21.6552	0.701884	0.508394	0.655702	-6.38269
S100a13	NA	24.1626	24.0996	NA	24.1653	24.8062	Secreted Factors	Matrisome-associated	0.354656	24.3084	0.721038	0.509341	0.656196	-6.15877
P4ha1	23.8596	24.9247	24.8423	20.9899	25.7375	24.7302	ECM Regulators	Matrisome-associated	-0.722995	24.1807	-0.663586	0.530996	0.673416	-6.41045
Plxnb1	NA	19.9336	19.7537	NA	20.1259	20.1754	ECM-affiliated Proteins	Matrisome-associated	0.307019	19.9971	0.682414	0.531096	0.673416	-6.18801
Serpini1	20.0089	17.9383	18.2747	23.0695	19.0748	16.7321	ECM Regulators	Matrisome-associated	0.884827	19.183	0.63143	0.550461	0.68767	-6.43271
Adam17	21.4236	20.8044	20.6633	17.8336	23.229	19.8763	ECM Regulators	Matrisome-associated	-0.650805	20.6384	-0.528205	0.615841	0.737298	-6.49752
Bmp7	NA	19.6452	20.0136	NA	21.5217	19.0339	Secreted Factors	Matrisome-associated	0.448336	20.0536	0.480126	0.655304	0.772327	-6.3191
Hcfc1	24.8664	26.4259	26.3871	24.424	25.6751	26.7823	Secreted Factors	Matrisome-associated	-0.266005	25.7601	-0.409489	0.696042	0.800586	-6.5589
Plxna1	21.9939	21.5093	21.3152	21.3902	22.2132	20.7006	ECM-affiliated Proteins	Matrisome-associated	-0.171464	21.5204	-0.372822	0.721776	0.818458	-6.5749
Crlf3	20.9083	20.6193	20.1569	20.8735	19.1281	22.5186	Secreted Factors	Matrisome-associated	0.278568	20.7008	0.341789	0.743871	0.832964	-6.58732
Itih2	22.4895	23.8478	23.5844	21.4919	24.0203	23.8029	ECM Regulators	Matrisome-associated	-0.202177	23.2061	-0.294841	0.777802	0.856452	-6.60412
P4ha2	23.2157	23.1044	23.2616	23.4788	23.375	22.9733	ECM Regulators	Matrisome-associated	0.0818156	23.2348	0.25323	0.808332	0.87647	-6.617
Fam20b	21.7734	22.9105	22.6299	23.013	23.8594	20.9106	ECM Regulators	Matrisome-associated	0.156372	22.5161	0.206778	0.842851	0.900691	-6.62911
Frem1	NA	22.0773	19.9351	NA	21.85	20.516	ECM-affiliated Proteins	Matrisome-associated	0.176828	21.0946	0.206939	0.845797	0.902596	-6.42901
Plod1	23.961	24.3578	24.232	23.1428	23.9823	25.8163	ECM Regulators	Matrisome-associated	0.130172	24.2487	0.199272	0.848466	0.904409	-6.63084
Plod2	20.3456	23.039	23.2934	17.2041	24.581	24.1767	ECM Regulators	Matrisome-associated	-0.238742	22.1066	-0.132863	0.898537	0.934723	-6.64339
S100a8	NA	21.695	21.1629	NA	22.6082	20.2079	Secreted Factors	Matrisome-associated	-0.0209288	21.4185	-0.0240276	0.98194	0.988094	-6.45444
Sfrp1	NA	20.7541	20.7409	NA	NA	20.7535	Secreted Factors	Matrisome-associated	0.00723566	20.7495	0.011552	0.991474	0.994936	-6.25778
Col6a2	25.9678	25.8904	26.0174	30.9173	31.1506	31.0149	Collagens	Core matrisome	5.06906	28.4931	16.6242	2.37979e-06	0.00369344	5.07634
Col6a1	26.2054	26.3241	26.3011	30.5378	30.8014	30.2885	Collagens	Core matrisome	4.26571	28.4097	13.3675	8.827e-06	0.00387797	4.13662
Dmbt1	24.4262	25.1422	25.6191	34.3761	32.8404	32.6775	ECM Glycoproteins	Core matrisome	8.23548	29.1802	13.8882	7.02248e-06	0.00387797	4.31126
Postn	24.0319	23.8648	23.5105	28.612	29.4543	27.7205	ECM Glycoproteins	Core matrisome	4.7932	26.199	10.0414	4.80039e-05	0.00699024	2.71868
Col6a3	26.3555	26.8708	26.9612	30.1493	31.4451	31.0895	Collagens	Core matrisome	4.16547	28.8119	9.92409	5.14151e-05	0.00704084	2.65703
Nid1	26.5326	26.7835	26.6553	29.6402	30.8107	30.2457	ECM Glycoproteins	Core matrisome	3.57511	28.4447	9.25088	7.73747e-05	0.00753472	2.2841
Fbln5	20.8959	22.6185	21.5951	25.557	27.005	26.8376	ECM Glycoproteins	Core matrisome	4.76338	24.0849	8.72206	0.000108699	0.0081154	1.96677
Mfge8	22.5211	23.8691	23.9152	27.8907	28.7137	27.4478	ECM Glycoproteins	Core matrisome	4.58224	25.7263	8.76684	0.000105542	0.0081154	1.99453
Fgb	22.9605	23.5486	23.6655	27.1313	26.0909	26.6942	ECM Glycoproteins	Core matrisome	3.24727	25.0152	7.76782	0.000210571	0.0113737	1.3328
Col4a2	23.4605	24.7365	24.5655	27.2258	27.5591	27.2359	Collagens	Core matrisome	3.08606	25.7972	7.32863	0.000292212	0.0128015	1.01141
Col4a1	22.3064	23.6043	24.0321	26.4911	26.8188	26.3892	Collagens	Core matrisome	3.25208	24.9403	6.57779	0.000532052	0.0151978	0.413045
Lama5	26.4233	27.2387	27.1052	30.0486	29.2163	29.398	ECM Glycoproteins	Core matrisome	2.63186	28.2384	6.34168	0.000649617	0.0168034	0.211036
Hspg2	26.8111	27.2857	27.0502	28.9769	29.6553	30.6887	Proteoglycans	Core matrisome	2.7246	28.4113	5.69492	0.00115722	0.0209221	-0.379446
Col6a6	22.0599	23.3769	23.3198	24.8412	25.8134	25.4962	Collagens	Core matrisome	2.46478	24.1512	5.37878	0.00156183	0.0246505	-0.689178
Bgn	24.5215	24.356	24.4089	22.6151	23.0563	22.3895	Proteoglycans	Core matrisome	-1.74185	23.5579	-5.19235	0.00187479	0.0258161	-0.878693
Col5a2	NA	19.4239	19.4615	NA	25.4884	NA	Collagens	Core matrisome	6.04933	21.458	9.65501	0.00189711	0.0258274	-0.65399
Col12a1	25.7854	26.1967	26.2907	27.7608	29.8169	28.7715	Collagens	Core matrisome	2.69212	27.437	5.08897	0.00207864	0.0267353	-0.986047
Fn1	26.8303	27.8682	27.5139	29.0172	31.181	30.4583	ECM Glycoproteins	Core matrisome	2.81468	28.8115	4.97738	0.00232729	0.0277843	-1.10375
Tinagl1	20.4822	21.8271	21.6533	23.3137	25.2174	23.8328	ECM Glycoproteins	Core matrisome	2.80046	22.7211	4.92904	0.0024453	0.0281119	-1.15534
Ltbp4	NA	17.9344	18.8277	NA	21.6013	22.3194	ECM Glycoproteins	Core matrisome	3.57928	20.1707	6.4684	0.00256949	0.0290515	-0.818474
Col15a1	22.542	23.1711	23.1615	24.2601	25.7729	25.3543	Collagens	Core matrisome	2.17093	24.0436	4.79705	0.00280348	0.0296613	-1.29806
Fbn1	25.4013	26.1475	26.1211	27.2051	28.7222	28.4649	ECM Glycoproteins	Core matrisome	2.2408	27.0103	4.80073	0.00279271	0.0296613	-1.29404
Lama2	22.1442	25.2773	25.2745	27.4455	28.743	28.4446	ECM Glycoproteins	Core matrisome	3.97904	26.2215	4.81347	0.00275585	0.0296613	-1.28016
Vtn	20.9837	24.3767	24.5952	27.0971	27.669	27.2058	ECM Glycoproteins	Core matrisome	4.00545	25.3213	4.41016	0.00424436	0.0360538	-1.7323
Ddx26b	NA	20.5019	20.665	NA	18.1689	17.4934	ECM Glycoproteins	Core matrisome	-2.75225	19.2073	-5.48773	0.00479209	0.0383152	-1.43163
Fgg	26.1653	24.5038	24.4998	29.2219	28.1819	26.703	ECM Glycoproteins	Core matrisome	2.97929	26.546	4.30492	0.00476908	0.0383152	-1.85458
Lamc1	27.5585	27.896	27.9651	28.9253	29.1802	29.1214	ECM Glycoproteins	Core matrisome	1.26913	28.4411	4.02667	0.00654223	0.0446637	-2.1865
Col3a1	27.1001	24.6048	24.5147	32.6416	28.4314	28.528	Collagens	Core matrisome	4.46044	27.6368	3.93674	0.00726415	0.0475026	-2.29644
Col1a1	24.6051	24.8632	24.9146	26.1717	26.7303	25.8001	Collagens	Core matrisome	1.43974	25.5142	3.92709	0.00734677	0.0479083	-2.30832
Tnxb	NA	21.3627	21.7122	25.3179	23.466	23.8519	ECM Glycoproteins	Core matrisome	2.56827	23.1421	4.13071	0.00849356	0.0529845	-2.24775
Dpt	NA	20.1934	16.7027	NA	25.2591	23.1526	ECM Glycoproteins	Core matrisome	5.75781	21.3269	4.56606	0.00938941	0.0554786	-2.12332
Fbln1	22.5943	20.1278	20.1898	25.4724	22.3989	24.1885	ECM Glycoproteins	Core matrisome	3.04933	22.4953	3.50685	0.0121879	0.0632651	-2.8395
Sbspon	NA	19.1539	19.5787	NA	16.8122	17.7239	ECM Glycoproteins	Core matrisome	-2.09824	18.3172	-3.92641	0.0159147	0.0743317	-2.68115
Lama4	24.0719	25.0508	25.1424	26.9454	26.2221	25.7988	ECM Glycoproteins	Core matrisome	1.5671	25.5386	3.21679	0.0175587	0.0781458	-3.22131
Adipoq	NA	NA	17.6204	NA	22.7557	21.2064	ECM Glycoproteins	Core matrisome	4.21192	20.5275	4.56063	0.0176608	0.0783879	-2.48652
Lamb2	20.9985	22.5511	23.1529	23.0341	25.9612	27.4064	ECM Glycoproteins	Core matrisome	3.23308	23.8507	3.16641	0.018732	0.0808558	-3.28876
Col5a1	21.0756	21.9443	21.9654	25.5259	23.0533	23.2734	Collagens	Core matrisome	2.28909	22.8063	3.16072	0.0188699	0.0811999	-3.2964
Lamb1	29.0035	28.1263	28.1197	29.785	29.6806	29.2751	ECM Glycoproteins	Core matrisome	1.16372	28.9984	3.07567	0.0210665	0.0859529	-3.41105
Fga	23.104	26.0241	24.6101	25.8372	27.5335	27.0703	ECM Glycoproteins	Core matrisome	2.23426	25.6965	3.0705	0.0212086	0.0861669	-3.41804
Fras1	21.1237	23.9302	24.1304	NA	26.4449	25.8363	ECM Glycoproteins	Core matrisome	2.89312	24.2931	3.05503	0.027139	0.0994952	-3.47534
Matn2	NA	19.4179	19.5409	NA	23.4196	21.1393	ECM Glycoproteins	Core matrisome	2.80004	20.8794	3.26522	0.0292139	0.104717	-3.33247
Thbs1	20.1808	22.381	22.4847	NA	19.8737	19.2273	ECM Glycoproteins	Core matrisome	-2.27588	20.8295	-2.92909	0.0314637	0.109119	-3.63101
Spon1	NA	21.7687	21.8151	NA	NA	19.5255	ECM Glycoproteins	Core matrisome	-2.27091	21.0364	-3.62382	0.0331931	0.112316	-3.13641
Ogn	21.1154	21.0101	21.547	19.5952	NA	NA	Proteoglycans	Core matrisome	-1.6081	20.8169	-2.88725	0.0426511	0.132743	-3.63425
Tnc	NA	22.0626	22.0934	NA	24.1994	22.99	ECM Glycoproteins	Core matrisome	1.51667	22.8364	2.57246	0.0595084	0.164739	-4.09651
Smoc1	NA	22.8189	22.5098	NA	21.6777	21.436	ECM Glycoproteins	Core matrisome	-1.10745	22.1106	-2.40983	0.0711253	0.182457	-4.28638
Emilin3	19.4998	20.6072	20.5897	16.937	19.7458	NA	ECM Glycoproteins	Core matrisome	-1.85652	19.4759	-2.22999	0.0745147	0.189068	-4.52634
Dcn	24.1109	24.9184	24.2483	24.1591	22.3783	17.9761	Proteoglycans	Core matrisome	-2.92137	22.9652	-2.08918	0.0804915	0.197247	-4.77699
Emilin1	24.2484	25.6144	25.5017	25.1986	26.9588	26.6525	ECM Glycoproteins	Core matrisome	1.14847	25.6957	2.08004	0.0815274	0.198947	-4.78962
Lama1	25.604	24.3784	24.3228	26.7271	24.678	26.6636	ECM Glycoproteins	Core matrisome	1.2545	25.3956	1.97779	0.0940795	0.219535	-4.93025
Vcan	22.639	23.181	23.3626	21.027	22.9198	22.282	Proteoglycans	Core matrisome	-0.984581	22.5686	-1.92203	0.101725	0.231226	-5.00635
Slit2	20.9679	20.5014	21.0375	NA	20.545	18.756	ECM Glycoproteins	Core matrisome	-1.17241	20.3616	-1.8609	0.120035	0.257204	-5.00535
Col1a2	23.1624	26.2104	26.05	23.4776	24.8196	21.8402	Collagens	Core matrisome	-1.76178	24.26	-1.73595	0.131976	0.272509	-5.25619
Fbn2	20.3731	24.8206	24.8756	22.1132	28.2223	27.0747	ECM Glycoproteins	Core matrisome	2.44699	24.5799	1.50556	0.181634	0.330889	-5.55316
Sparcl1	21.8882	22.396	22.5891	19.5617	22.1801	22.1241	ECM Glycoproteins	Core matrisome	-1.00247	21.7898	-1.44195	0.198169	0.351333	-5.63194
Kcp	NA	22.8044	23.231	NA	24.9131	22.9782	ECM Glycoproteins	Core matrisome	0.927983	23.4817	1.17244	0.303771	0.465096	-5.73877
Creld2	21.4936	23.1576	23.1798	21.2713	24.9964	24.6151	ECM Glycoproteins	Core matrisome	1.01723	23.119	1.08153	0.31998	0.482745	-6.04211
Col18a1	26.1743	26.3815	26.2853	25.6197	28.1161	26.903	Collagens	Core matrisome	0.59926	26.58	0.991448	0.358806	0.517054	-6.13273
Pxdn	24.3408	25.7165	25.8358	24.157	27.5422	26.4199	ECM Glycoproteins	Core matrisome	0.742012	25.6687	0.911408	0.39635	0.556516	-6.20845
Mmrn2	21.7226	20.4739	20.4255	20.3429	NA	NA	ECM Glycoproteins	Core matrisome	-0.694114	20.7412	-0.934948	0.400854	0.560585	-5.83485
Pcolce	21.8385	20.766	21.128	21.9184	20.4013	20.2023	ECM Glycoproteins	Core matrisome	-0.40348	21.0424	-0.774767	0.467171	0.62023	-6.32626
Nid2	25.0883	26.0021	25.988	25.4819	26.6224	25.937	ECM Glycoproteins	Core matrisome	0.320953	25.8533	0.752237	0.479661	0.629983	-6.3442
Lum	25.129	25.8156	25.7037	26.1076	25.8692	25.4154	Proteoglycans	Core matrisome	0.247991	25.6734	0.657115	0.534878	0.675268	-6.41501
Vwa5a	21.8377	23.121	22.3401	20.3385	25.5733	23.5267	ECM Glycoproteins	Core matrisome	0.713184	22.7896	0.622183	0.556141	0.692906	-6.43894
Vwf	NA	23.3686	23.7285	NA	24.1842	23.4034	ECM Glycoproteins	Core matrisome	0.245294	23.6712	0.460288	0.668351	0.782015	-6.32981
Slit3	18.8621	23.1982	22.9738	NA	22.5836	22.4006	ECM Glycoproteins	Core matrisome	0.543701	22.0036	0.418797	0.692231	0.797385	-6.44451
Vwa9	21.0086	22.3361	22.3871	18.1236	23.0511	23.0682	ECM Glycoproteins	Core matrisome	-0.496303	21.6624	-0.402555	0.700877	0.802973	-6.56204
Aebp1	20.4354	15.8835	19.825	NA	19.5676	18.5593	ECM Glycoproteins	Core matrisome	0.514018	18.8541	0.369771	0.726248	0.82113	-6.46644
Agrn	24.9878	25.3279	25.35	25.442	25.1684	25.3136	ECM Glycoproteins	Core matrisome	0.0860786	25.265	0.269709	0.796193	0.869369	-6.61213
Npnt	NA	18.1327	19.1517	NA	17.4369	19.437	ECM Glycoproteins	Core matrisome	-0.205247	18.5396	-0.259037	0.807925	0.87647	-6.41452
AW551984	22.2789	21.5415	21.4467	20.7859	22.8554	21.9446	ECM Glycoproteins	Core matrisome	0.106262	21.8088	0.179513	0.863296	0.913316	-6.63509
Spp1	20.8678	20.5272	21.1949	NA	21.8737	20.0823	ECM Glycoproteins	Core matrisome	0.115146	20.9092	0.179618	0.864295	0.913879	-6.52654
Col4a6	NA	21.3572	21.1334	NA	22.4517	20.2708	Collagens	Core matrisome	0.115959	21.3033	0.142264	0.893499	0.932172	-6.44257
Matn4	NA	21.2205	21.364	NA	21.5968	20.9584	ECM Glycoproteins	Core matrisome	-0.0146405	21.2849	-0.0295609	0.977782	0.985893	-6.45426
Tgfbi	22.8842	23.1124	23.1597	19.5637	24.4002	25.0877	ECM Glycoproteins	Core matrisome	-0.0349607	23.0347	-0.0267477	0.979507	0.986072	-6.65306
Clps	22.5881	21.5568	22.2744	32.3263	31.9563	31.4894	NA	Cell	9.78419	27.0319	23.836	2.66639e-07	0.000797586	6.29559
Pdia2	23.5082	23.7008	22.9406	29.442	30.608	30.0958	NA	Cell	6.6654	26.7159	15.8449	3.17973e-06	0.0037012	4.88166
Amy2	28.2372	29.5916	29.3211	38.8786	36.8412	37.0514	NA	Cell	8.54044	33.3202	12.5043	1.31461e-05	0.00387797	3.8223
Cpb1	25.4494	26.6428	26.1442	33.954	32.565	32.4956	NA	Cell	6.92606	29.5418	12.4757	1.33264e-05	0.00387797	3.81133
Ctrl	23.7923	24.1108	23.9028	29.5813	28.5149	28.7601	NA	Cell	5.0168	26.4437	12.6861	1.20631e-05	0.00387797	3.89122
Fcgbp	25.7049	25.7146	25.81	31.4947	30.3821	30.8928	NA	Cell	5.18004	28.3332	13.5278	8.21973e-06	0.00387797	4.19152
Hbb-bh1	27.414	27.5088	27.2319	23.5539	23.5821	23.461	NA	Cell	-3.85257	25.4586	-12.6268	1.24044e-05	0.00387797	3.86892
Pnliprp1	28.5853	29.0638	28.8252	36.873	35.1373	35.5807	NA	Cell	7.0389	32.3442	13.7528	7.44695e-06	0.00387797	4.26686
Pnliprp2	22.3948	24.7974	23.6268	30.7341	31.6811	31.2606	NA	Cell	7.61894	27.4158	12.8287	1.12852e-05	0.00387797	3.94425
Trove2	22.8545	23.4299	22.973	18.1626	18.1817	18.3615	NA	Cell	-4.85054	20.6605	-14.6991	4.99586e-06	0.00387797	4.5631
Ggt1	24.1488	25.1344	25.211	29.6914	30.5482	29.7813	NA	Cell	5.17555	27.4192	12.0936	1.60347e-05	0.00439163	3.6609
Ipo4	25.7518	25.5565	25.3397	20.0722	21.3458	20.5836	NA	Cell	-4.88214	23.1083	-11.6667	1.98452e-05	0.00503746	3.48433
Zg16	26.0896	25.6691	26.4356	35.6899	33.3551	33.1614	NA	Cell	8.00402	30.0668	11.5975	2.05567e-05	0.00503746	3.45484
Abcd3	24.4586	25.1249	25.0159	21.2908	20.8824	20.6783	NA	Cell	-3.91597	22.9085	-10.5752	3.54315e-05	0.00663951	2.98783
Extl3	20.2871	21.1112	21.3382	NA	27.4609	27.1154	NA	Cell	6.31602	23.4626	13.3795	3.34293e-05	0.00663951	2.82639
Kat7	22.1973	22.9179	23.032	30.1181	28.3574	28.3826	NA	Cell	6.23695	25.8342	10.6469	3.40531e-05	0.00663951	3.02255
Trio	21.0174	21.4394	21.3035	NA	28.7847	27.4158	NA	Cell	6.82416	23.9922	13.2096	3.56503e-05	0.00663951	2.78214
Ctrb1	27.7573	28.7619	28.3987	37.8888	35.0812	35.4553	NA	Cell	7.83584	32.2239	10.0247	4.84714e-05	0.00699024	2.70999
Mrpl41	22.481	22.4472	22.4779	18.6457	18.5759	19.408	NA	Cell	-3.5921	20.6726	-10.0462	4.78676e-05	0.00699024	2.72123
Mtap	24.3299	24.689	24.5538	29.2279	28.6673	27.9953	NA	Cell	4.1059	26.5772	9.98726	4.95442e-05	0.00699024	2.69035
Rdh13	22.2329	22.612	22.796	16.999	14.7081	14.4093	NA	Cell	-7.17481	18.9595	-10.1814	4.42669e-05	0.00699024	2.79109
Aqp1	21.0992	21.9243	21.8807	26.4672	25.9487	25.4179	NA	Cell	4.30984	23.7897	9.81634	5.47981e-05	0.00728971	2.59954
Arpc4	26.3667	25.9401	25.8085	22.9837	23.0708	22.7882	NA	Cell	-3.09083	24.493	-9.43197	6.9143e-05	0.0073876	2.38771
Camk4	18.0518	19.0474	18.9295	NA	25.012	26.4227	NA	Cell	6.98112	21.4927	11.8204	6.22521e-05	0.0073876	2.37969
Chtop	23.8651	24.7242	24.6443	20.5204	20.7423	19.6992	NA	Cell	-4.09058	22.3659	-9.3996	7.05376e-05	0.0073876	2.36937
Gm9825	22.9796	23.0224	22.9567	26.1501	27.3632	27.0092	NA	Cell	3.85462	24.9135	9.64812	6.06065e-05	0.0073876	2.50815
Matr3	27.9184	27.6466	27.6904	24.7302	23.8919	24.5705	NA	Cell	-3.35426	26.0746	-9.45649	6.81081e-05	0.0073876	2.40154
Mlec	26.3827	26.6815	26.5361	29.4128	29.9947	29.6161	NA	Cell	3.14111	28.104	9.6363	6.10406e-05	0.0073876	2.50165
Mrpl55	21.7859	22.2504	22.1955	19.0657	18.5873	18.3695	NA	Cell	-3.4031	20.3757	-9.44274	6.86864e-05	0.0073876	2.39379
Ppcs	NA	21.6968	21.6974	NA	28.9369	29.3706	NA	Cell	7.45665	25.4254	15.9881	6.83888e-05	0.0073876	1.85655
Tacc3	21.0375	21.4395	21.0964	18.2638	18.2704	18.1553	NA	Cell	-2.96128	19.7105	-9.44559	6.8566e-05	0.0073876	2.3954
Pdcd6	25.0288	24.5848	24.3459	21.4081	21.6311	21.456	NA	Cell	-3.15476	23.0758	-9.31329	7.44166e-05	0.00753225	2.32009
Rps3a	29.5303	29.8457	30.0261	32.6147	33.1197	33.4919	NA	Cell	3.27472	31.4381	9.14095	8.29211e-05	0.00765148	2.21999
Sec24d	22.9538	23.8929	23.5787	20.1783	20.145	20.1783	NA	Cell	-3.30793	21.8211	-9.1241	8.38113e-05	0.00765148	2.21007
Alb	28.1137	28.0635	27.8604	32.4281	31.3793	31.2568	NA	Cell	3.67551	29.8503	9.08789	8.57617e-05	0.00767897	2.18869
Phb	28.1388	28.0074	27.9842	25.4586	25.1061	24.991	NA	Cell	-2.85822	26.6144	-9.03757	8.8559e-05	0.00777983	2.15882
Ddx39b	28.667	28.8328	28.6198	25.8323	26.1174	25.6413	NA	Cell	-2.84287	27.2851	-8.97867	9.19685e-05	0.00778555	2.12358
Lamtor3	24.2935	23.7455	23.8359	21.1808	20.9653	20.7031	NA	Cell	-3.00854	22.454	-8.9971	9.0886e-05	0.00778555	2.13463
Timm50	25.4209	25.6111	25.7644	22.0134	22.388	21.1177	NA	Cell	-3.75911	23.7192	-8.93126	9.48224e-05	0.00788381	2.09502
Hnrnpl	27.9824	27.82	27.9806	25.1942	24.9028	25.3263	NA	Cell	-2.78657	26.5344	-8.89456	9.71023e-05	0.00793172	2.07278
Aldh1a7	19.5425	21.8031	21.0634	25.6541	26.0151	25.6725	NA	Cell	4.97758	23.2918	8.72589	0.000108425	0.0081154	1.96915
Cttn	23.5391	23.691	23.8983	19.6941	20.8524	19.696	NA	Cell	-3.62865	21.8952	-8.62248	0.000116118	0.0081154	1.90443
Elavl1	27.6771	28.0952	27.9728	25.1765	25.3082	25.0176	NA	Cell	-2.74761	26.5413	-8.64072	0.000114716	0.0081154	1.91592
Gstm7	20.3971	19.8766	19.404	23.5873	23.185	24.1897	NA	Cell	3.76137	21.7733	8.61393	0.000116781	0.0081154	1.89904
Sf3b14	24.6558	25.381	25.5578	21.993	21.2822	21.6421	NA	Cell	-3.55912	23.4186	-8.82233	0.000101776	0.0081154	2.0287
Sfn	21.2219	21.7372	21.7031	25.5338	27.6802	26.1013	NA	Cell	4.88441	23.9963	8.73813	0.000107554	0.0081154	1.97675
Aldh1l2	22.6118	23.1323	23.299	25.9315	27.1185	26.3936	NA	Cell	3.46683	24.7478	8.45151	0.000130255	0.00891867	1.79541
Pan2	19.936	20.113	20.0806	12.9899	NA	NA	NA	Cell	-7.03269	18.2799	-13.4733	0.000137774	0.00929673	1.21454
Suds3	NA	21.0778	21.7927	NA	28.2574	28.1298	NA	Cell	6.75832	24.8144	13.3762	0.000141897	0.00943818	1.46454
Atp5l	NA	25.8688	25.6347	NA	19.3756	18.5521	NA	Cell	-6.78794	22.3578	-13.1858	0.000150442	0.00945934	1.42978
Fkbp2	23.4762	24.227	24.2806	27.0604	27.113	26.8026	NA	Cell	2.99741	25.4933	8.21054	0.000153682	0.00945934	1.63734
Igf2bp2	27.8022	27.8202	27.5718	25.3614	25	24.9877	NA	Cell	-2.61503	26.4239	-8.26566	0.000147923	0.00945934	1.67396
Phb2	28.1271	28.0833	28.125	25.6643	25.2603	25.6662	NA	Cell	-2.58151	26.821	-8.20379	0.000154405	0.00945934	1.63283
Reep5	25.1036	25.937	26.1478	28.7767	28.8223	28.9957	NA	Cell	3.13541	27.2972	8.27222	0.000147254	0.00945934	1.6783
Tmx4	22.6096	23.8031	24.0535	NA	31.4844	29.7373	NA	Cell	7.03771	26.3376	9.89673	0.00015051	0.00945934	1.67667
Exoc7	22.0755	21.9724	21.852	NA	18.4639	17.9977	NA	Cell	-3.72543	20.4723	-9.63433	0.000171833	0.0103903	1.56471
Fam129a	23.7912	24.0906	24.2228	26.5375	26.5026	26.9626	NA	Cell	2.63272	25.3512	8.03139	0.00017426	0.010402	1.51637
Gm20425	27.8879	27.3325	27.0337	31.2248	30.4117	30.2073	NA	Cell	3.1966	29.0163	7.99008	0.000179444	0.0104566	1.48804
Ranbp3	23.7998	24.5073	25.1022	19.2064	20.48	21.0187	NA	Cell	-4.23474	22.3524	-7.9709	0.000181912	0.0104566	1.47483
Slc44a1	21.6096	22.668	23.0096	18.9678	19.0398	18.8877	NA	Cell	-3.46399	20.6971	-7.98423	0.000180192	0.0104566	1.48402
Cpa1	28.5009	28.2461	28.2648	35.3747	32.6613	33.1161	NA	Cell	5.38008	31.0273	7.91326	0.000189563	0.010737	1.43493
Gstm2	25.6341	25.855	25.7687	28.3529	28.0274	28.3229	NA	Cell	2.48177	26.9935	7.8998	0.000191403	0.010737	1.42557
Ypel5	21.3101	21.1678	21.1371	18.4573	17.675	18.6695	NA	Cell	-2.93774	19.7361	-7.84463	0.000199161	0.0110392	1.387
Gstm1	25.2151	25.4542	25.3424	27.5884	27.8952	28.1717	NA	Cell	2.54784	26.6112	7.82239	0.00020239	0.0110862	1.37137
Cntfr	23.3275	23.8983	23.8474	20.5501	20.7285	21.3404	NA	Cell	-2.81809	22.2821	-7.72403	0.00021741	0.0113737	1.30165
Nmt2	NA	20.2816	20.4425	NA	26.892	26.1541	NA	Cell	6.16102	23.4426	12.0672	0.000215812	0.0113737	1.2042
Suclg1	24.5196	25.4756	25.5542	21.5157	22.4199	22.0029	NA	Cell	-3.2036	23.5813	-7.74036	0.00021483	0.0113737	1.31329
Pwp2	22.1322	21.7933	22.3866	17.8471	18.1453	19.4315	NA	Cell	-3.62942	20.2893	-7.70577	0.000220338	0.0113988	1.28859
Baz2b	NA	18.4881	18.7358	NA	23.9977	24.4238	NA	Cell	5.5988	21.4114	11.9647	0.000223414	0.0114309	1.18155
Orc2	19.2097	21.1217	19.9324	23.5569	24.9125	24.2645	NA	Cell	4.15672	22.1663	7.62585	0.000233695	0.011827	1.23109
Cyb5b	26.2854	26.7249	26.6654	29.2076	29.3663	28.8185	NA	Cell	2.5722	27.8447	7.59586	0.000238946	0.0118355	1.20933
Cyfip2	21.8018	20.4917	21.032	NA	15.8268	16.6714	NA	Cell	-4.79287	19.1647	-9.01098	0.000238629	0.0118355	1.28053
Hbb-y	30.7951	29.9188	29.8267	26.7842	26.3891	27.4094	NA	Cell	-3.31931	28.5205	-7.54682	0.000247825	0.0120195	1.17357
Pcgf6	NA	18.3201	18.9138	NA	24.1457	24.5248	NA	Cell	5.71832	21.4761	11.6751	0.00024677	0.0120195	1.11554
Qsox1	23.6544	23.7508	23.728	27.3936	26.4592	26.237	NA	Cell	2.98554	25.2039	7.45837	0.000264816	0.0127112	1.10844
0610010K14Rik	NA	27.5345	27.5647	NA	22.5318	21.9896	NA	Cell	-5.28892	24.9051	-11.0539	0.00030794	0.0128015	0.963399
Atp5j2	26.0926	25.8772	25.8095	23.3103	21.4389	21.7846	NA	Cell	-3.7485	24.0522	-7.29554	0.000299712	0.0128015	0.986374
Cpa3	22.2708	22.9009	22.5635	29.3941	26.8091	27.1038	NA	Cell	5.19061	25.1737	7.34794	0.000287936	0.0128015	1.02596
Dbt	24.4549	24.6829	24.8162	26.9414	27.2173	26.8838	NA	Cell	2.36282	25.8327	7.42583	0.0002714	0.0128015	1.08427
Ero1lb	20.6556	21.3665	21.3079	23.4004	24.5042	24.3916	NA	Cell	2.98871	22.6044	7.29267	0.000300372	0.0128015	0.984198
Khdrbs1	27.6038	27.9149	27.9086	24.3861	25.5789	24.6663	NA	Cell	-2.93201	26.3431	-7.32064	0.000294003	0.0128015	1.00538
Lsg1	21.8671	21.2767	21.5597	NA	17.6142	18.2424	NA	Cell	-3.61076	20.112	-8.55952	0.000306661	0.0128015	1.05735
Rap2b	NA	23.7789	24.4659	NA	15.621	17.2406	NA	Cell	-7.69158	20.2766	-11.248	0.000287002	0.0128015	1.01254
Slc25a20	23.1528	23.8123	23.8951	20.4513	19.8843	18.6851	NA	Cell	-3.94647	21.6468	-7.35567	0.000286246	0.0128015	1.03178
Sorcs2	NA	20.0539	19.3706	NA	14.2482	14.2268	NA	Cell	-5.47471	16.9749	-11.0578	0.0003075	0.0128015	0.964406
Timm13	24.7978	26.1372	25.7223	21.4744	22.3044	22.6586	NA	Cell	-3.40659	23.8491	-7.29746	0.000299271	0.0128015	0.98783
Trip6	20.762	19.9253	20.1679	17.6809	17.7618	17.7245	NA	Cell	-2.5627	19.0037	-7.26213	0.000307507	0.0128015	0.96098
Ttr	25.681	26.2479	26.1629	28.7394	28.2971	28.9674	NA	Cell	2.63734	27.3493	7.32167	0.000293772	0.0128015	1.00615
Mdc1	22.8739	23.1842	23.2986	NA	17.1689	NA	NA	Cell	-5.96257	21.6314	-11.0133	0.000312558	0.0128331	0.760795
Timeless	21.924	21.3411	21.6575	15.5474	NA	NA	NA	Cell	-6.14784	20.1175	-10.9989	0.000314212	0.0128331	0.757556
Arhgef5	NA	19.3677	19.1777	NA	24.47	25.1839	NA	Cell	5.55423	22.0498	10.9168	0.00032387	0.0131125	0.927764
Mrps31	23.1345	24.1347	24.2516	20.1331	20.866	21.1817	NA	Cell	-3.11336	22.2836	-7.18337	0.000326824	0.013118	0.900627
Etfb	27.5203	26.9344	27.1474	23.9943	24.8039	24.5911	NA	Cell	-2.73762	25.8319	-7.16525	0.000331462	0.0131905	0.886646
Aven	NA	21.2019	21.5743	NA	15.8137	16.415	NA	Cell	-5.27375	18.7512	-10.7574	0.000343705	0.0134535	0.885302
Pigk	22.146	23.1228	22.8994	19.1531	19.9448	18.2971	NA	Cell	-3.59106	20.9272	-7.11825	0.000343851	0.0134535	0.850207
2410018M08Rik	23.7751	23.0099	23.2721	NA	19.9981	19.532	NA	Cell	-3.54672	21.9174	-8.12852	0.000394024	0.0135171	0.829349
Abhd11	22.8485	22.3306	22.4428	18.7963	19.3829	NA	NA	Cell	-3.46043	21.1602	-8.06464	0.000409345	0.0135171	0.794236
Actr1a	24.4288	24.7097	24.3759	22.2781	22.4837	22.2944	NA	Cell	-2.15273	23.4284	-6.94035	0.000395788	0.0135171	0.710057
Adck4	NA	21.4583	21.1311	NA	27.258	26.3497	NA	Cell	5.50912	24.0493	10.3922	0.000395091	0.0135171	0.783819
Aifm2	NA	23.5167	23.695	NA	15.9583	13.8211	NA	Cell	-8.71618	19.2478	-10.5919	0.000365905	0.0135171	0.840052
Aimp2	22.3379	22.8527	23.3034	18.1432	NA	19.2558	NA	Cell	-4.12978	21.1786	-8.22956	0.000371154	0.0135171	0.884173
Aldh1a1	22.7374	22.0445	22.6162	25.4624	27.6987	27.2737	NA	Cell	4.34557	24.6388	6.9248	0.00040074	0.0135171	0.697634
Apcs	17.946	22.0444	21.0087	27.3012	27.4219	26.5851	NA	Cell	6.76971	23.7179	6.90564	0.000406939	0.0135171	0.682291
Atg4b	21.424	21.368	21.1921	24.0896	24.6331	23.4229	NA	Cell	2.72047	22.6883	6.91339	0.000404418	0.0135171	0.688504
Cep290	NA	17.3785	17.8145	NA	22.4806	22.9114	NA	Cell	5.09947	20.1463	10.6524	0.000357583	0.0135171	0.856749
Coq5	21.3296	22.3895	22.0902	16.2992	18.2416	18.4814	NA	Cell	-4.26241	19.8053	-7.09117	0.000351226	0.0135171	0.829108
Ddt	NA	22.7422	22.5053	NA	27.6275	28.3275	NA	Cell	5.35378	25.3006	10.4985	0.000379208	0.0135171	0.813987
Dkk3	NA	21.1892	21.8747	NA	26.692	27.2049	NA	Cell	5.41651	24.2402	10.646	0.000358447	0.0135171	0.855
Eif3l	27.2009	27.8688	28.036	25.172	25.3271	25.034	NA	Cell	-2.52417	26.4398	-7.0157	0.000372764	0.0135171	0.769856
Itgb3	NA	19.1408	18.5427	NA	24.0892	23.8436	NA	Cell	5.12462	21.4041	10.5707	0.000368871	0.0135171	0.834175
Oxa1l	20.7875	20.5287	20.875	17.8986	15.5871	15.8269	NA	Cell	-4.29283	18.584	-6.93796	0.000396545	0.0135171	0.708147
Selenbp1	24.0708	23.834	23.9581	26.3081	25.9291	26.0829	NA	Cell	2.15238	25.0305	6.91186	0.000404915	0.0135171	0.687276
Smarcal1	NA	20.0702	20.2657	NA	26.6501	25.5637	NA	Cell	5.93892	23.1374	10.3435	0.000402638	0.0135171	0.769828
Sntb2	22.5899	22.9775	22.7961	NA	19.7816	19.0827	NA	Cell	-3.37475	21.4456	-8.1234	0.000395227	0.0135171	0.826546
Tmem165	23.6517	24.6177	24.4262	20.5103	21.8313	21.2119	NA	Cell	-3.04735	22.7082	-6.924	0.000400996	0.0135171	0.696995
Trim28	28.5788	28.826	28.814	26.3098	26.5604	25.6921	NA	Cell	-2.55214	27.4635	-7.07737	0.000355058	0.0135171	0.818315
Med16	20.6117	20.9873	21.4511	NA	27.1603	NA	NA	Cell	6.14924	22.5526	10.2424	0.000418874	0.0137343	0.574965
Eed	NA	22.5024	22.4896	NA	17.6496	16.8308	NA	Cell	-5.25579	19.8681	-10.1947	0.000426824	0.0138513	0.726381
Wnk2	19.9205	20.0787	20.1976	14.6681	NA	NA	NA	Cell	-5.36964	18.7162	-10.1854	0.000428392	0.0138513	0.560189
Kdm3b	22.1478	22.021	22.1459	NA	19.219	19.138	NA	Cell	-2.92225	20.9343	-7.9497	0.000438718	0.0140874	0.730175
Clu	24.932	25.0209	25.0362	29.3166	27.4332	28.4801	NA	Cell	3.41362	26.7032	6.76723	0.000455131	0.0142221	0.570173
Lemd3	22.6472	22.435	22.6045	24.7111	25.3694	24.6937	NA	Cell	2.36247	23.7435	6.77582	0.000451956	0.0142221	0.577198
Rap1gds1	23.3203	23.8767	23.6062	21.4475	20.5231	20.3875	NA	Cell	-2.81504	22.1936	-6.76891	0.000454507	0.0142221	0.571552
Tmlhe	NA	21.5325	21.7064	NA	26.2203	26.854	NA	Cell	4.91768	24.0783	10.0837	0.000446052	0.0142221	0.693251
H2afy	27.7434	27.662	27.6417	25.4573	23.8769	23.901	NA	Cell	-3.27067	26.0471	-6.73938	0.000465599	0.0143618	0.547343
Tmed7	24.3758	24.7295	24.0158	20.7754	20.9135	22.0491	NA	Cell	-3.12772	22.8098	-6.73893	0.000465771	0.0143618	0.546973
Itgam	NA	21.8744	21.6034	NA	26.8581	27.8762	NA	Cell	5.62827	24.553	9.93114	0.000474232	0.0143768	0.646748
Maged1	22.4606	21.0366	21.1137	NA	13.7304	NA	NA	Cell	-7.7105	19.5853	-9.92255	0.000475885	0.0143768	0.490085
Sfr1	23.1626	24.3171	24.2112	19.9427	21.3415	20.8556	NA	Cell	-3.18369	22.3051	-6.72015	0.000472986	0.0143768	0.531527
Yap1	21.6691	22.5932	22.4688	18.9081	19.879	18.4606	NA	Cell	-3.16115	20.6631	-6.70574	0.00047861	0.0143768	0.519646
Susd2	18.5662	17.329	17.0805	21.2567	23.2357	21.6903	NA	Cell	4.4023	19.8597	6.69477	0.000482945	0.014414	0.510581
Inip	NA	21.0698	20.8707	NA	16.2276	16.5634	NA	Cell	-4.57473	18.6829	-9.83153	0.000493827	0.0145969	0.615734
Ncald	23.3686	23.3969	23.5323	21.5732	20.8533	20.9175	NA	Cell	-2.31794	22.2737	-6.664	0.000495342	0.0145969	0.485082
Fam91a1	21.8068	22.9578	23.0588	19.1217	19.888	18.4829	NA	Cell	-3.4436	20.886	-6.6541	0.000499407	0.0146242	0.476855
Clta	25.8157	24.9772	25.1695	21.5508	22.8617	22.2394	NA	Cell	-3.1035	23.769	-6.58897	0.000527122	0.0151978	0.422435
Elmo2	23.933	24.4084	25.1141	27.275	29.4263	28.3848	NA	Cell	3.87691	26.4236	6.59925	0.000522631	0.0151978	0.431061
Palm	22.8841	22.3933	22.7808	19.6106	NA	19.8224	NA	Cell	-2.9977	21.4982	-7.63757	0.000531942	0.0151978	0.550258
Mapk7	19.8282	20.1156	20.0626	NA	14.9302	NA	NA	Cell	-5.09374	18.7342	-9.62527	0.000537673	0.0152647	0.406698
Dock6	22.1825	22.7099	22.6137	19.6078	19.7225	20.5823	NA	Cell	-2.53113	21.2364	-6.52219	0.000557382	0.0156336	0.366093
Mnat1	21.0864	21.5323	21.374	18.31	17.3159	18.968	NA	Cell	-3.1329	19.7644	-6.52827	0.000554546	0.0156336	0.371246
Krt42	24.2623	24.7465	24.8164	26.484	27.4267	27.4918	NA	Cell	2.52577	25.8713	6.48172	0.000576683	0.016078	0.331686
Anpep	26.6521	27.1492	27.0336	29.0421	29.2151	28.8775	NA	Cell	2.09994	27.9949	6.44605	0.000594331	0.0162278	0.301188
Gm20390	28.2596	28.4944	28.4826	30.9262	30.3229	30.4711	NA	Cell	2.1612	29.4928	6.41899	0.000608129	0.0162278	0.27795
Gm9242	NA	26.3248	27.0404	NA	21.9832	22.0538	NA	Cell	-4.66405	24.3505	-9.35162	0.00060351	0.0162278	0.458839
Rps6ka1	22.0637	24.1173	23.2872	17.9004	18.3175	19.954	NA	Cell	-4.43209	20.94	-6.43887	0.000597957	0.0162278	0.29503
Rps6ka5	NA	21.9365	22.5511	NA	26.6481	27.0971	NA	Cell	4.62876	24.5582	9.32688	0.000609937	0.0162278	0.450405
Tm9sf4	24.6947	26.1926	26.5583	21.485	22.9112	21.9208	NA	Cell	-3.70953	23.9604	-6.42449	0.000605295	0.0162278	0.28268
Tmpo	25.1515	26.1942	26.1292	22.9829	23.5618	23.3014	NA	Cell	-2.54296	24.5535	-6.44276	0.000595987	0.0162278	0.29837
Uqcrfs1	26.1836	26.6237	27.0903	22.6531	24.2555	22.5685	NA	Cell	-3.47348	24.8958	-6.42089	0.000607147	0.0162278	0.279586
Ube2m	23.428	23.2334	23.4623	25.2645	25.9166	25.44	NA	Cell	2.16579	24.4575	6.37244	0.000632735	0.0166441	0.23775
Cd47	22.8912	23.065	23.5011	25.0212	26.0031	26.1015	NA	Cell	2.55619	24.4305	6.35152	0.000644159	0.0167579	0.219599
Eif3k	24.5687	25.4474	25.4935	21.9514	22.5147	23.0525	NA	Cell	-2.66369	23.8381	-6.35135	0.000644257	0.0167579	0.219445
Hspa2	NA	21.133	21.4163	NA	26.5596	28.1325	NA	Cell	6.0714	24.3103	9.16443	0.000654314	0.0168314	0.394114
Scp2	25.5749	26.3018	26.3269	23.2542	24.057	22.9721	NA	Cell	-2.64008	24.7478	-6.29199	0.000677988	0.0173446	0.167627
Cdc42ep1	22.3355	22.5962	22.3268	20.3848	20.4888	20.5754	NA	Cell	-1.9365	21.4513	-6.27392	0.000688653	0.0174956	0.151765
Tardbp	NA	27.4567	27.3742	NA	23.4362	23.2929	NA	Cell	-4.05085	25.39	-9.03871	0.000691408	0.0174956	0.349468
Rnase1	19.9144	22.4867	22.762	29.6139	27.4957	27.0672	NA	Cell	6.33792	24.89	6.2628	0.00069531	0.0174993	0.141985
Stk25	20.5932	18.7254	18.8094	22.8122	23.546	22.735	NA	Cell	3.65505	21.2035	6.24068	0.000708776	0.0177423	0.122474
Apoh	NA	20.2033	20.2479	NA	24.4889	24.1533	NA	Cell	4.09554	22.2733	8.92259	0.000727997	0.0178191	0.307366
Arpc3	23.6787	24.6818	24.6165	21.9055	21.9238	21.2593	NA	Cell	-2.62946	23.0109	-6.21612	0.000724074	0.0178191	0.100743
Cd36	22.236	23.3991	23.7896	25.6886	27.8694	27.6715	NA	Cell	3.93492	25.109	6.16229	0.000758939	0.0178191	0.052839
Cyfip1	25.3328	25.4183	25.4665	23.7059	23.3241	23.3929	NA	Cell	-1.93161	24.4401	-6.15259	0.000765426	0.0178191	0.0441623
Fabp4	22.7889	21.8918	22.3523	24.4772	25.4634	25.5991	NA	Cell	2.83556	23.7621	6.19841	0.000735336	0.0178191	0.0850277
Fkbp11	23.033	22.3031	22.4307	27.5268	25.7285	25.3064	NA	Cell	3.59824	24.3881	6.1772	0.000749097	0.0178191	0.0661403
Fmnl3	19.3884	21.4568	21.327	17.258	15.983	16.3917	NA	Cell	-4.17982	18.6342	-6.15663	0.000762721	0.0178191	0.0477716
Iah1	21.8605	22.2908	21.9629	23.7671	24.7849	24.6046	NA	Cell	2.34747	23.2118	6.15729	0.000762275	0.0178191	0.0483675
Klk1	22.2604	25.3794	25.0829	30.8884	29.1983	29.8144	NA	Cell	5.72613	27.104	6.17776	0.000748731	0.0178191	0.0666384
Krt5	26.4238	26.2955	26.9669	28.9898	28.7583	28.5242	NA	Cell	2.19534	27.6597	6.16693	0.000755865	0.0178191	0.0569756
Sec23a	24.119	24.3	24.2167	21.588	22.5267	21.6555	NA	Cell	-2.28851	23.0676	-6.16579	0.000756616	0.0178191	0.0559629
Smarcd2	25.237	25.5383	25.4295	23.3945	23.668	23.251	NA	Cell	-1.96376	24.4197	-6.19133	0.000739902	0.0178191	0.0787233
Telo2	25.6224	24.8806	26.0277	28.3557	28.1832	29.918	NA	Cell	3.30876	27.1646	6.20068	0.000733881	0.0178191	0.0870446
Acaa1a	26.5464	26.8152	26.7286	24.3963	22.5825	22.2115	NA	Cell	-3.63328	24.8801	-6.13305	0.000778682	0.0179482	0.026653
Tmem55a	22.4151	22.5911	22.5178	20.135	19.6856	20.742	NA	Cell	-2.32045	21.3477	-6.13763	0.000775554	0.0179482	0.030758
Ddi2	24.1225	23.6976	23.6358	20.8181	20.5491	21.892	NA	Cell	-2.73222	22.4525	-6.11678	0.000789922	0.017953	0.0120327
Ppib	28.2949	28.9706	28.853	30.8792	31.3028	30.6114	NA	Cell	2.22499	29.8187	6.11049	0.000794311	0.017953	0.00637777
Qil1	NA	23.2529	22.818	NA	18.972	18.9515	NA	Cell	-4.07366	20.9986	-8.7383	0.000791085	0.017953	0.238801
Rdh14	22.0681	21.2608	21.2243	18.6733	18.62	19.4705	NA	Cell	-2.59644	20.2195	-6.1266	0.000783118	0.017953	0.0208582
Cdk4	24.0415	24.6448	24.65	21.8093	22.4892	22.4652	NA	Cell	-2.1909	23.35	-6.09441	0.000805677	0.0181219	-0.00812448
Rps20	28.8079	28.9759	29.1783	26.3209	26.8396	27.2482	NA	Cell	-2.18449	27.8951	-6.08471	0.000812619	0.0181902	-0.0168846
Dnpep	25.7607	26.1013	25.9367	28.8032	28.0514	27.8615	NA	Cell	2.30581	27.0858	6.07129	0.000822335	0.0182323	-0.0290226
Myo5b	22.6318	23.1858	23.4325	21.0997	20.7746	20.6758	NA	Cell	-2.23333	21.9667	-6.07425	0.000820178	0.0182323	-0.0263393
Nop16	23.1285	23.1333	23.1227	20.6012	21.4421	21.0069	NA	Cell	-2.11142	22.0725	-6.05906	0.000831306	0.0182574	-0.0401074
Phf8	NA	19.3193	19.2561	NA	23.2564	23.0768	NA	Cell	3.87888	21.2272	8.63534	0.000829265	0.0182574	0.19953
Prkra	25.5445	25.166	25.1452	21.7079	22.7989	20.3655	NA	Cell	-3.66112	23.4547	-6.04873	0.000838967	0.0183391	-0.0494812
H2afy2	27.5101	27.1207	27.356	24.1936	25.1743	25.2525	NA	Cell	-2.4555	26.1012	-6.03173	0.000851759	0.0185317	-0.0649487
Gsta3	22.2281	22.2811	22.0219	20.3864	19.023	19.4635	NA	Cell	-2.55274	20.9007	-6.00591	0.000871611	0.0188754	-0.0885106
Dpp4	23.5438	23.631	23.7306	25.6763	25.9026	25.289	NA	Cell	1.98752	24.6289	5.99852	0.000877392	0.0189127	-0.0952737
Ppp1r9a	20.864	19.4786	19.6407	NA	13.4865	NA	NA	Cell	-6.4089	18.3675	-8.50051	0.00088275	0.0189405	0.0464938
Vps37c	21.8155	22.2659	22.1605	18.9564	19.6329	20.2667	NA	Cell	-2.46192	20.8497	-5.98119	0.000891114	0.0190322	-0.111155
Bcas2	24.8278	25.8289	25.5962	21.7814	23.045	23.1179	NA	Cell	-2.76955	24.0329	-5.96824	0.000901523	0.0190795	-0.123043
Med17	20.7447	22.0177	22.0052	18.0697	19.3182	18.8137	NA	Cell	-2.85535	20.1615	-5.97051	0.000899695	0.0190795	-0.120965
Gstt2	NA	20.0199	19.9465	NA	24.6885	23.893	NA	Cell	4.30761	22.137	8.4372	0.000909324	0.0191575	0.121951
Znf521	NA	19.0741	18.7108	NA	23.5775	22.8077	NA	Cell	4.30012	21.0425	8.42034	0.000916566	0.0192231	0.115226
Cel	25.4002	26.1131	25.7956	32.4652	29.1962	30.1549	NA	Cell	4.8358	28.1875	5.92277	0.000939206	0.0196096	-0.164989
Thop1	25.1257	25.2699	25.141	27.0763	26.8215	27.2097	NA	Cell	1.85697	26.1073	5.91463	0.000946136	0.0196661	-0.172525
Abcc1	NA	20.4384	20.8718	NA	24.4524	24.639	NA	Cell	3.89059	22.6004	8.33504	0.000954311	0.0196662	0.0808911
Mrps9	22.5268	23.2201	23.0347	20.4797	21.2252	20.6124	NA	Cell	-2.15483	21.8498	-5.89993	0.000958811	0.0196662	-0.186168
Tmed1	23.913	23.6586	23.9594	21.1262	19.5259	18.0543	NA	Cell	-4.27488	21.7062	-5.90035	0.000958443	0.0196662	-0.185774
Aldh1l1	23.203	20.7342	20.5482	26.6168	25.589	25.0658	NA	Cell	4.26207	23.6262	5.89437	0.000963647	0.0196787	-0.191326
Rps17	27.4379	28.0931	28.1307	25.68	25.6611	26.095	NA	Cell	-2.07518	26.8496	-5.88164	0.000974843	0.0198204	-0.203175
Gmds	22.6851	22.8763	22.6608	24.7246	24.4917	24.4637	NA	Cell	1.81928	23.6504	5.8713	0.000984039	0.0199204	-0.212807
Isg20l2	21.2337	21.5047	21.3555	NA	NA	17.0177	NA	Cell	-4.34512	20.2779	-8.24906	0.000994314	0.0199548	-0.0449766
Sycn	21.3115	19.1797	19.3581	28.6013	24.6367	24.8092	NA	Cell	6.06594	22.9827	5.86247	0.000991972	0.0199548	-0.221045
2210010C04Rik	31.2862	29.2239	29.5715	35.6961	33.1901	33.7945	NA	Cell	4.19968	32.1271	5.81861	0.00103247	0.020375	-0.262131
Arfrp1	21.2118	20.5287	20.3261	NA	24.7556	23.5568	NA	Cell	3.51756	22.0758	6.64817	0.0010278	0.020375	-0.0830739
Ipo7	25.9012	25.4612	25.54	23.5465	23.9702	23.4474	NA	Cell	-1.97941	24.6444	-5.8213	0.00102994	0.020375	-0.259611
Ubr2	20.7471	20.9178	21.0438	NA	NA	16.614	NA	Cell	-4.31596	19.8307	-8.16481	0.00103552	0.020375	-0.0766168
UncharacterizedproteinCXorf38homologOS=MusmusculusPE=2SV=1	NA	18.5255	18.9275	NA	14.9799	14.8076	NA	Cell	-3.83276	16.8101	-8.16161	0.00103713	0.020375	0.00947182
Stx2	20.8591	20.3124	20.8949	18.7281	18.853	18.4268	NA	Cell	-2.01947	19.6791	-5.79923	0.00105097	0.0204745	-0.280373
Tceb1	25.1483	25.7087	25.4799	23.6549	23.3202	22.7843	NA	Cell	-2.19253	24.3494	-5.79921	0.00105099	0.0204745	-0.280391
Dynlrb1	25.5595	25.0958	24.4856	22.1039	22.4642	22.9704	NA	Cell	-2.53411	23.7799	-5.77083	0.00107876	0.0208411	-0.307203
Atad1	23.8614	23.6482	24.0012	NA	19.5381	NA	NA	Cell	-4.26262	22.7622	-7.99358	0.00112594	0.02085	-0.142529
Atp5o	26.9095	27.6675	27.1487	25.317	24.3827	23.8601	NA	Cell	-2.72196	25.8809	-5.74184	0.00110799	0.02085	-0.334697
Calr	29.3098	29.3938	29.6022	31.5416	31.0217	31.3496	NA	Cell	1.869	30.3698	5.72928	0.00112093	0.02085	-0.346644
Cog3	20.9621	21.6101	22.0187	NA	24.5996	24.5265	NA	Cell	2.97818	22.7434	6.52302	0.00112352	0.02085	-0.170661
Flnb	27.9148	28.182	28.2053	29.927	29.7341	30.0452	NA	Cell	1.80135	29.0014	5.73341	0.00111665	0.02085	-0.342708
Hist1h4a	33.8807	33.2382	33.2236	31.5001	30.7576	31.5225	NA	Cell	-2.18745	32.3538	-5.76183	0.00108774	0.02085	-0.315722
Kras	NA	21.9156	21.6853	NA	16.9623	17.8731	NA	Cell	-4.38276	19.6091	-8.0599	0.00108981	0.02085	-0.033442
Ubqln2	25.7924	26.6436	26.422	21.7484	24.0893	21.7283	NA	Cell	-3.76401	24.404	-5.73813	0.00111179	0.02085	-0.338219
Uqcrc1	26.8586	27.3613	27.2505	25.3981	24.189	24.4783	NA	Cell	-2.46833	25.9226	-5.72203	0.00112848	0.02085	-0.353553
Vdac2	26.6454	26.5586	26.6481	28.4681	28.6321	28.1854	NA	Cell	1.81113	27.523	5.73404	0.001116	0.02085	-0.342113
Wdfy1	20.5129	20.5998	20.4706	18.8205	18.252	17.5331	NA	Cell	-2.32585	19.3648	-5.73231	0.00111779	0.02085	-0.343762
Gnb2	NA	26.2518	26.0524	NA	22.5993	22.5257	NA	Cell	-3.58953	24.3573	-7.97592	0.00113581	0.0209025	-0.0694612
Apex1	25.2465	25.4649	25.3824	22.2082	23.4609	23.3235	NA	Cell	-2.36707	24.1811	-5.70343	0.00114811	0.0209221	-0.371308
Fundc2	24.0806	24.8504	24.9641	22.6365	21.9039	21.4909	NA	Cell	-2.62126	23.3211	-5.70186	0.00114979	0.0209221	-0.372812
Polr2e	24.9739	25.1407	24.9517	23.2921	21.8004	21.787	NA	Cell	-2.72894	23.6577	-5.69356	0.00115868	0.0209221	-0.380748
Rps13	28.7127	28.8428	28.7542	26.9826	27.1801	26.5896	NA	Cell	-1.85244	27.8437	-5.69295	0.00115934	0.0209221	-0.381333
Gm9493	28.3361	28.1764	28.2545	26.3937	25.2556	24.4635	NA	Cell	-2.88471	26.8133	-5.67618	0.00117758	0.0210877	-0.397411
Ptk7	27.3405	27.3459	27.466	25.4773	25.7268	24.8757	NA	Cell	-2.02418	26.372	-5.6775	0.00117613	0.0210877	-0.396138
Rps15	26.0129	26.3703	26.7843	24.5409	23.9308	24.4186	NA	Cell	-2.09239	25.343	-5.66019	0.00119526	0.0213224	-0.412767
Cox7a2	25.7123	25.4402	25.5673	22.1182	23.1954	23.652	NA	Cell	-2.58474	24.2809	-5.63082	0.00122856	0.0218326	-0.441087
Ddx27	22.1226	23.4231	23.4195	18.6791	20.5367	20.2216	NA	Cell	-3.17591	21.4004	-5.61768	0.00124378	0.0220192	-0.453791
Idi1	22.7573	23.0192	22.961	24.9163	24.4404	24.9193	NA	Cell	1.84619	23.8356	5.60797	0.00125519	0.0221369	-0.463206
Mtmr9	19.9919	20.7959	20.5381	NA	15.8976	NA	NA	Cell	-4.61237	19.3059	-7.72913	0.00128547	0.0225854	-0.248704
Magi3	NA	19.9316	19.5186	NA	23.272	23.5824	NA	Cell	3.70218	21.5761	7.71221	0.00129659	0.0226464	-0.186136
Sco2	NA	21.9669	22.074	NA	26.6325	25.7079	NA	Cell	4.14974	24.0953	7.70908	0.00129867	0.0226464	-0.187558
Nudt16l1	24.4882	25.2194	25.2359	22.8477	22.1972	21.1651	NA	Cell	-2.91116	23.5256	-5.56564	0.00130625	0.0226937	-0.504362
Dync2h1	18.4906	21.8609	22.0646	NA	27.6534	29.9122	NA	Cell	7.75518	23.9963	6.30179	0.00131961	0.0228405	-0.329966
Rplp1	25.3231	25.5406	25.4338	23.9456	23.267	23.3006	NA	Cell	-1.9281	24.4684	-5.55008	0.00132562	0.0228597	-0.519561
Mrps28	21.7036	25.4068	25.4874	17.6113	19.729	18.5152	NA	Cell	-5.5808	21.4089	-5.54394	0.00133335	0.022908	-0.525563
Mocs1	NA	22.8317	23.5023	NA	19.0978	18.1962	NA	Cell	-4.52003	20.907	-7.64795	0.00133993	0.0229364	-0.215416
Stau1	22.9442	22.9092	22.9784	20.5975	21.3863	21.1173	NA	Cell	-1.91027	21.9888	-5.53438	0.00134549	0.0229472	-0.534925
Nudt9	NA	22.0661	21.7316	NA	18.5035	18.2748	NA	Cell	-3.50969	20.144	-7.61991	0.00135939	0.0230157	-0.228295
Rpl9-ps6	26.8874	27.5738	27.6346	25.5517	25.0785	24.6605	NA	Cell	-2.26838	26.2311	-5.52483	0.00135774	0.0230157	-0.544291
Atp6v0a2	NA	20.7076	20.9244	NA	13.9941	NA	NA	Cell	-6.80102	18.542	-10.7357	0.00136779	0.023074	-0.464614
Enpp3	21.4782	21.2376	21.7261	23.2507	24.6556	25.1574	NA	Cell	2.87394	22.9176	5.49833	0.00139241	0.0234046	-0.570349
Lsm1	21.1195	21.4985	21.4349	17.2372	NA	NA	NA	Cell	-4.06937	20.3225	-7.56464	0.00139878	0.0234271	-0.317559
Mocs3	25.7892	25.6326	25.7078	16.9694	20.8973	NA	NA	Cell	-6.77671	22.9992	-6.20449	0.0014184	0.0235001	-0.401888
Pfn2	NA	23.4446	23.8202	NA	20.0298	20.259	NA	Cell	-3.48797	21.8884	-7.52686	0.00142651	0.0235001	-0.27151
Pnpo	21.5516	21.5405	21.1945	23.4689	23.1908	22.9639	NA	Cell	1.779	22.3184	5.4785	0.00141901	0.0235001	-0.589913
Spryd3	NA	18.3709	18.6375	NA	22.7396	22.0277	NA	Cell	3.87942	20.4439	7.54747	0.0014113	0.0235001	-0.261878
Ugdh	23.625	23.8373	23.488	22.1473	21.7578	21.7169	NA	Cell	-1.77612	22.7621	-5.47162	0.00142838	0.0235001	-0.596718
Des	27.8986	27.5403	27.5534	26.073	24.5918	25.2303	NA	Cell	-2.36576	26.4812	-5.46388	0.001439	0.0235087	-0.604383
Zwilch	20.5399	20.9535	20.5052	16.5246	NA	NA	NA	Cell	-4.11732	19.6308	-7.51219	0.00143747	0.0235087	-0.339985
Hmga2	21.9135	23.6057	24.2608	18.8389	17.1698	20.0234	NA	Cell	-4.58259	20.9687	-5.44678	0.00146278	0.0238136	-0.621336
Fus	27.2293	27.7256	27.8214	25.0679	25.0363	26.0775	NA	Cell	-2.19823	26.493	-5.43641	0.0014774	0.0238954	-0.631633
Ndn	NA	20.0977	20.1484	NA	23.4228	24.0032	NA	Cell	3.58997	21.918	7.45896	0.00147807	0.0238954	-0.303505
Clcc1	22.665	23.0233	23.2554	20.8604	21.3943	20.5082	NA	Cell	-2.06025	21.9511	-5.42573	0.00149266	0.0239649	-0.642265
Ruvbl1	26.4892	27.4639	27.456	25.1894	24.414	24.7568	NA	Cell	-2.34966	25.9616	-5.42586	0.00149247	0.0239649	-0.642132
Ndufa5	22.6649	22.9354	22.7537	20.3429	18.9177	20.721	NA	Cell	-2.79076	21.3893	-5.42143	0.00149885	0.0239816	-0.64655
Vcl	26.5799	26.764	26.5996	28.0535	28.6928	28.6815	NA	Cell	1.82812	27.5619	5.41385	0.00150983	0.0240638	-0.654107
Tbc1d1	20.484	21.2987	21.5425	17.4093	19.0244	18.781	NA	Cell	-2.70348	19.7566	-5.39192	0.00154211	0.0244219	-0.676011
Armc10	24.029	25.2108	25.0171	22.176	21.9365	22.8857	NA	Cell	-2.41954	23.5425	-5.35861	0.00159267	0.0247197	-0.709435
Asl	22.7534	23.7596	23.5545	25.9819	28.4814	26.2845	NA	Cell	3.56012	25.1359	5.35854	0.00159276	0.0247197	-0.709499
Ccnyl1	NA	19.6101	19.6594	NA	NA	13.2212	NA	Cell	-6.4183	17.4969	-10.2413	0.0015821	0.0247197	-0.54622
Chm	NA	20.715	20.3856	NA	23.8838	23.9423	NA	Cell	3.36275	22.2317	7.32786	0.00158424	0.0247197	-0.366408
Ogfod3	22.378	22	21.5435	15.8334	16.4065	19.2986	NA	Cell	-4.79436	19.5767	-5.36309	0.00158576	0.0247197	-0.704933
Tm9sf1	21.9112	22.0732	21.6179	23.5731	25.4832	24.9209	NA	Cell	2.79163	23.2633	5.35212	0.00160273	0.0247917	-0.715963
Maz	NA	20.6695	20.3383	NA	13.9961	NA	NA	Cell	-6.53957	18.3347	-10.1717	0.00161574	0.0249103	-0.558369
Ankmy2	21.0231	21.9432	22.3015	16.4987	NA	NA	NA	Cell	-5.11655	20.4416	-7.26739	0.00163636	0.0251242	-0.447759
Dtd2	20.9467	21.7139	21.696	18.8871	18.7732	NA	NA	Cell	-2.59862	20.4034	-6.00096	0.00165452	0.0251242	-0.556134
Hars2	22.662	23.209	23.1276	21.2934	21.3199	21.1619	NA	Cell	-1.74113	22.129	-5.32538	0.00164497	0.0251242	-0.74293
Stx12	23.2809	24.3258	24.1291	19.2024	21.0418	NA	NA	Cell	-3.76898	22.396	-5.99931	0.0016566	0.0251242	-0.5574
Zfhx3	NA	20.1249	20.6496	NA	16.9348	16.9474	NA	Cell	-3.44615	18.6642	-7.24783	0.00165366	0.0251242	-0.405553
Akr1b1	24.4767	25.0591	24.7682	26.2826	27.5371	27.8061	NA	Cell	2.44061	25.9883	5.29927	0.00168745	0.0254084	-0.769375
Lnp	23.936	22.2396	22.2776	27.1756	27.0072	25.0774	NA	Cell	3.60234	24.6189	5.29011	0.00170263	0.0254084	-0.778667
Rab23	22.3733	22.3276	22.1448	18.936	20.475	20.1051	NA	Cell	-2.44322	21.0603	-5.30155	0.00168368	0.0254084	-0.767056
Sec61g	NA	24.0039	23.5338	NA	27.1277	27.5331	NA	Cell	3.56148	25.5496	7.19817	0.00169861	0.0254084	-0.430131
Slc25a4	28.1017	27.7841	27.7511	26.4615	25.1793	25.4035	NA	Cell	-2.19752	26.7802	-5.29244	0.00169875	0.0254084	-0.776301
Pcbp2	26.0278	26.4365	26.2773	22.3855	24.5536	22.9706	NA	Cell	-2.94402	24.7752	-5.28199	0.00171623	0.0254483	-0.786925
Tpd52l2	25.245	26.007	26.1175	22.9604	24.0145	23.8486	NA	Cell	-2.18195	24.6988	-5.28295	0.00171462	0.0254483	-0.785951
Memo1	22.2409	21.5826	21.5887	20.2891	19.8262	19.5298	NA	Cell	-1.92239	20.8429	-5.27724	0.00172425	0.025486	-0.79176
Bpnt1	22.352	23.3546	23.0266	24.9773	27.8113	26.5898	NA	Cell	3.54837	24.6852	5.26931	0.00173771	0.0255826	-0.799835
Gsn	26.5495	26.6543	26.4182	25.1282	24.3387	23.9682	NA	Cell	-2.06228	25.5095	-5.25757	0.00175787	0.0255826	-0.811803
Krt20	21.3487	23.1469	23.3934	25.2814	25.5239	26.5323	NA	Cell	3.1495	24.2044	5.2647	0.00174559	0.0255826	-0.804529
Pcmt1	22.8227	22.9583	22.7295	21.1427	21.0678	21.3733	NA	Cell	-1.64223	22.0157	-5.25735	0.00175825	0.0255826	-0.812033
Eno1	29.3099	29.5606	29.5144	32.0053	31.2176	31.0916	NA	Cell	1.97655	30.4499	5.25359	0.00176476	0.0255973	-0.815867
Cfl2	23.6546	23.4095	23.2055	20.5581	18.384	NA	NA	Cell	-3.97307	21.8423	-5.91076	0.0017737	0.025647	-0.626171
Supv3l1	22.425	23.2031	22.6979	20.3714	NA	19.7052	NA	Cell	-2.69593	21.6805	-5.90466	0.00178212	0.0256891	-0.63095
Ccdc90b	21.1291	21.8252	21.386	19.4253	19.9603	19.0842	NA	Cell	-1.9568	20.4684	-5.23866	0.00179089	0.0257358	-0.831129
Hsd17b10	26.6823	26.8954	26.8453	25.3542	24.0772	24.3679	NA	Cell	-2.20793	25.7037	-5.23035	0.00180564	0.0257885	-0.839648
Usp39	23.6075	23.6747	23.9723	22.1477	21.8701	21.165	NA	Cell	-2.02391	22.7396	-5.23147	0.00180364	0.0257885	-0.838496
Anln	18.0437	20.4422	20.6902	NA	24.7556	24.7	NA	Cell	4.84096	21.7263	5.82884	0.00189074	0.0258161	-0.690703
Bcl2l1	NA	21.7663	21.8282	NA	18.6103	17.8827	NA	Cell	-3.55075	20.0219	-7.04439	0.00184763	0.0258161	-0.507669
Bcl2l13	23.2422	22.7984	23.0832	21.4714	20.7462	19.9596	NA	Cell	-2.31553	21.8835	-5.19777	0.00186476	0.0258161	-0.873118
Cd63	22.3125	19.4688	20.0553	24.3271	26.4061	25.0229	NA	Cell	4.63981	22.9321	5.19203	0.00187539	0.0258161	-0.879021
Flnc	27.1103	27.1424	27.1009	28.6164	28.7701	28.6616	NA	Cell	1.56483	27.9003	5.20166	0.00185758	0.0258161	-0.869106
Impdh1	22.5866	22.3166	22.516	25.4991	25.8833	24.0625	NA	Cell	2.67524	23.8106	5.20201	0.00185694	0.0258161	-0.868748
Itgb1	26.9925	27.1065	27.0281	29.6111	28.4426	29.2973	NA	Cell	2.07463	28.0797	5.2048	0.00185181	0.0258161	-0.865878
Ncapd3	22.1732	22.4545	22.3209	NA	24.3964	24.7777	NA	Cell	2.2571	23.2245	5.84049	0.00187355	0.0258161	-0.681471
Ndufa11	21.8196	21.5067	21.6209	23.382	25.3473	24.4564	NA	Cell	2.74615	23.0222	5.18393	0.00189052	0.0258161	-0.887374
Nefm	24.9561	24.4865	24.8155	23.1024	22.5588	23.2452	NA	Cell	-1.78391	23.8607	-5.18438	0.00188969	0.0258161	-0.886917
Pafah1b3	24.9938	24.5889	24.5954	22.9247	20.9848	20.3426	NA	Cell	-3.30867	23.0717	-5.19064	0.00187797	0.0258161	-0.880454
Ppp1r12c	NA	20.9211	20.7798	NA	14.7046	NA	NA	Cell	-6.15941	18.8018	-9.78641	0.00181984	0.0258161	-0.628722
Smpd2	22.6736	23.4395	23.463	18.8144	20.5688	16.9852	NA	Cell	-4.40253	20.9908	-5.22001	0.00182417	0.0258161	-0.850252
Fip1l1	22.4126	23.1888	23.2601	18.2577	20.9091	19.7316	NA	Cell	-3.32102	21.2933	-5.17053	0.00191587	0.0260066	-0.901219
Hspa4l	21.8359	22.4497	22.2592	25.1662	24.2739	23.9179	NA	Cell	2.27109	23.3171	5.15442	0.00194685	0.0260331	-0.917898
Mrpl37	23.5305	24.0684	23.9635	NA	21.4233	19.8733	NA	Cell	-3.23692	22.5718	-5.79228	0.00194588	0.0260331	-0.71979
Pgm1	25.0251	25.513	25.3317	27.4043	30.6936	29.4907	NA	Cell	3.90627	27.2431	5.15212	0.00195131	0.0260331	-0.920278
Pm20d1	20.8161	22.0935	21.6474	23.8747	24.9578	23.4845	NA	Cell	2.58665	22.8123	5.15704	0.00194177	0.0260331	-0.915183
Spryd4	23.7386	23.8018	23.8093	22.1779	21.6321	22.3219	NA	Cell	-1.73926	22.9136	-5.15275	0.00195008	0.0260331	-0.91962
Commd1	22.3548	21.8485	22.1591	25.9679	NA	NA	NA	Cell	3.80219	23.0826	6.91928	0.00198081	0.0263504	-0.610297
Pbx1	23.7444	24.6764	24.8054	20.8045	21.4405	22.7082	NA	Cell	-2.75767	23.0299	-5.1336	0.00198771	0.0263669	-0.9395
Cpne2	NA	20.5512	20.8875	NA	23.888	24.7384	NA	Cell	3.59381	22.5163	6.8931	0.00201015	0.0265135	-0.586122
Nsmce2	NA	24.0316	23.9745	NA	17.8117	14.5038	NA	Cell	-7.84526	20.0804	-6.8936	0.00200958	0.0265135	-0.585859
Rpl19	25.212	26.2237	26.1378	24.0807	23.1617	23.1567	NA	Cell	-2.39146	24.6621	-5.11378	0.00202752	0.0265919	-0.960129
Cfb	20.5558	20.1154	20.1349	22.1954	21.6647	22.5162	NA	Cell	1.85678	21.1971	5.09378	0.00206862	0.0266961	-0.981013
Cnot2	22.1446	22.589	22.2615	19.7167	NA	17.9097	NA	Cell	-3.49377	20.9243	-5.72119	0.00205855	0.0266961	-0.77685
Dnm1	21.3657	21.2958	21.0639	NA	NA	17.5717	NA	Cell	-3.63596	20.3243	-6.86052	0.0020474	0.0266961	-0.638864
Gpd2	25.5163	26.0473	26.0946	28.1738	28.317	27.3443	NA	Cell	2.05898	26.9156	5.09327	0.00206968	0.0266961	-0.981549
Hnrnph3	25.2859	25.6124	25.6179	21.992	23.9645	22.4528	NA	Cell	-2.70229	24.1543	-5.1055	0.00204442	0.0266961	-0.968769
Vps26b	21.719	22.6236	23.0794	20.1352	20.1501	18.9547	NA	Cell	-2.72734	21.1103	-5.09318	0.00206987	0.0266961	-0.981644
Idh3g	23.5647	24.2085	24.3218	21.4085	19.661	21.818	NA	Cell	-3.06919	22.4971	-5.08258	0.00209205	0.0267616	-0.992738
Msh6	25.0791	25.3618	25.4174	27.142	26.6967	26.9951	NA	Cell	1.6585	26.1153	5.08064	0.00209613	0.0267616	-0.99477
Samd4b	21.5164	21.9491	22.276	19.8696	20.399	19.5945	NA	Cell	-1.95952	20.9341	-5.07747	0.00210283	0.0267616	-0.99809
Slc4a1	24.2762	23.6334	23.7008	22.3455	21.6892	20.9159	NA	Cell	-2.21997	22.7602	-5.07706	0.00210368	0.0267616	-0.998512
Tmod2	20.1151	20.7725	20.3325	24.233	NA	NA	NA	Cell	3.88226	21.3633	6.79342	0.00212684	0.0269825	-0.671902
Mib1	NA	25.1765	25.0342	NA	21.3386	19.7264	NA	Cell	-4.57284	22.8189	-6.78762	0.00213388	0.0269982	-0.64213
Dlst	25.3914	26.3892	26.3161	23.775	23.4746	21.9274	NA	Cell	-2.97326	24.5456	-5.05389	0.00215342	0.0271717	-1.02285
Mylk	19.1827	16.9294	19.7629	22.5146	21.7519	22.2143	NA	Cell	3.53533	20.3926	5.05095	0.00215982	0.0271787	-1.02594
Ddx52	21.528	22.02	22.5904	NA	19.5933	19.3585	NA	Cell	-2.62003	21.018	-5.65605	0.00216854	0.0271917	-0.829735
Grb7	20.9878	21.2809	21.5923	18.4969	19.8006	18.2769	NA	Cell	-2.4289	20.0726	-5.04514	0.00217253	0.0271917	-1.03205
2210016F16Rik	22.4031	23.3045	23.0253	24.8726	24.694	24.6821	NA	Cell	1.83858	23.8303	5.03507	0.00219478	0.0273232	-1.04266
Atp1b3	23.2345	24.2348	24.2612	21.3801	22.3046	21.2223	NA	Cell	-2.27451	22.7729	-5.02184	0.00222439	0.0275446	-1.05662
Lage3	NA	20.9156	21.0718	NA	17.3375	15.8698	NA	Cell	-4.39007	18.7987	-6.71695	0.00222202	0.0275446	-0.680275
Rpp25l	NA	21.5941	21.1981	NA	18.0807	16.8841	NA	Cell	-3.9137	19.4392	-6.70772	0.00223385	0.0275884	-0.685294
Rbl1	NA	18.7131	18.7395	NA	23.3574	22.1066	NA	Cell	4.00574	20.7292	6.69775	0.00224672	0.0276739	-0.690722
Hmgb3	25.6942	26.3821	26.1976	24.44	23.4078	24.1397	NA	Cell	-2.09546	25.0436	-5.00649	0.00225933	0.0277557	-1.07286
Dcp1a	24.2767	23.0022	23.1701	20.3851	20.7137	NA	NA	Cell	-2.96368	22.3096	-5.60081	0.00226723	0.0277795	-0.875037
Cops2	24.6978	25.6563	25.5233	NA	22.6669	22.9336	NA	Cell	-2.5493	24.2956	-5.57692	0.00231154	0.0277815	-0.894764
Deptor	18.1188	18.0004	18.3664	21.7121	NA	NA	NA	Cell	3.55847	19.0494	6.65305	0.00230555	0.0277815	-0.742465
Dut	23.7627	24.0114	23.862	21.6588	22.2554	20.5154	NA	Cell	-2.40215	22.6776	-5.00017	0.00227389	0.0277815	-1.07956
Nup43	NA	23.6742	23.4236	NA	NA	17.7519	NA	Cell	-5.77293	21.6166	-9.07863	0.00229175	0.0277815	-0.77323
Pcyt2	NA	20.6931	20.7104	NA	17.6308	16.7498	NA	Cell	-3.5114	18.946	-6.66635	0.00228785	0.0277815	-0.707889
Rps10	28.2423	27.7786	27.6438	26.5513	25.2014	25.4383	NA	Cell	-2.15786	26.8093	-4.99022	0.00229703	0.0277815	-1.09011
Srsf11	25.4428	24.851	24.7026	23.391	21.681	22.6778	NA	Cell	-2.41552	23.791	-4.98252	0.00231513	0.0277815	-1.09829
Tmem14c	23.202	23.2875	22.3308	24.5726	25.5479	25.0964	NA	Cell	2.1322	24.0062	4.9862	0.00230647	0.0277815	-1.09438
Kdm1a	24.4123	25.2179	25.2099	22.7013	23.001	23.4558	NA	Cell	-1.89401	23.9997	-4.97846	0.00232473	0.0277843	-1.10261
Commd10	NA	22.2159	21.8529	NA	18.8498	17.7319	NA	Cell	-3.74354	20.1626	-6.59561	0.00238395	0.0278152	-0.74694
Cpe	25.7498	25.4057	25.3876	26.8998	27.343	27.2219	NA	Cell	1.64055	26.3346	4.95587	0.002379	0.0278152	-1.12667
Egfr	21.8598	21.7255	22.0841	NA	NA	18.3988	NA	Cell	-3.52835	21.0171	-6.60911	0.00236524	0.0278152	-0.76497
Gatm	21.7361	23.3805	23.0107	25.8974	24.8053	25.8285	NA	Cell	2.80125	24.1098	4.96148	0.00236539	0.0278152	-1.12068
Lsm6	24.1643	23.5921	23.6075	21.7507	20.8372	NA	NA	Cell	-2.51136	22.7903	-5.55609	0.00235099	0.0278152	-0.912022
Pfdn1	24.1869	22.2673	23.2169	20.3937	18.6125	20.7825	NA	Cell	-3.29413	21.5766	-4.96317	0.0023613	0.0278152	-1.11888
Poglut1	24.2018	25.8477	25.5213	22.9613	21.6716	22.266	NA	Cell	-2.8906	23.7449	-4.95311	0.00238573	0.0278152	-1.12961
Prpf38a	21.4566	21.6444	21.7951	23.9596	22.9601	23.6424	NA	Cell	1.8887	22.5764	4.97343	0.00233669	0.0278152	-1.10795
Rps19	NA	28.5133	28.3637	NA	24.8748	25.4926	NA	Cell	-3.25478	26.8111	-6.60423	0.00237199	0.0278152	-0.742157
Trnt1	23.7515	23.4281	23.7622	21.8488	21.841	22.3459	NA	Cell	-1.63537	22.8296	-4.95151	0.00238962	0.0278152	-1.13131
Coa3	NA	23.8038	23.7403	NA	20.2289	20.8611	NA	Cell	-3.22703	22.1585	-6.5758	0.00241175	0.027887	-0.757971
Safb2	23.3697	23.9005	23.8542	22.1503	21.9913	21.3147	NA	Cell	-1.88934	22.7635	-4.94194	0.00241317	0.027887	-1.14154
Slc39a7	22.1725	22.4365	22.6543	20.315	19.3983	20.9081	NA	Cell	-2.21395	21.3141	-4.9417	0.00241376	0.027887	-1.1418
Ahnak	28.6076	29.0487	29.1552	30.82	30.3419	30.7675	NA	Cell	1.70598	29.7902	4.93634	0.00242705	0.0279711	-1.14752
Acads	26.1735	27.0398	27.0032	24.8513	25.0423	24.9662	NA	Cell	-1.78554	25.8461	-4.92215	0.00246268	0.0282419	-1.16272
Ehhadh	19.9841	21.0527	21.2529	NA	NA	16.1919	NA	Cell	-4.66538	19.6204	-6.52234	0.00248874	0.0283318	-0.809995
Usp34	NA	20.4007	20.7232	NA	15.5889	17.094	NA	Cell	-4.22049	18.4517	-6.52232	0.00248877	0.0283318	-0.787947
Wdr43	24.0262	23.647	23.786	21.3392	19.6059	21.8819	NA	Cell	-2.87736	22.381	-4.91354	0.00248458	0.0283318	-1.17196
Larp4	23.5234	23.9754	24.1439	22.327	21.4401	22.1536	NA	Cell	-1.90732	22.9272	-4.88048	0.0025707	0.0290515	-1.20753
Safb	23.8915	23.1859	23.462	21.2354	19.5431	NA	NA	Cell	-3.1288	22.2636	-5.44958	0.00256542	0.0290515	-1.00122
Akap9	23.7474	24.3065	24.6073	25.5551	26.4251	26.5289	NA	Cell	1.9493	25.1951	4.87088	0.00259634	0.0292701	-1.21789
Alcam	26.2959	26.208	26.1918	27.7464	28.9404	27.9446	NA	Cell	1.97854	27.2212	4.86226	0.00261961	0.0294178	-1.2272
Dsg2	22.7102	22.8917	23.0392	24.5212	24.4136	24.2773	NA	Cell	1.52369	23.6422	4.85671	0.00263472	0.0294178	-1.23321
Erlin2	26.2328	26.55	26.6008	24.3991	25.1316	24.8639	NA	Cell	-1.66299	25.6297	-4.86132	0.00262216	0.0294178	-1.22822
Ppih	23.4036	24.5054	24.5615	22.3079	20.9338	21.4947	NA	Cell	-2.57805	22.8678	-4.85762	0.00263224	0.0294178	-1.23222
Kiaa0907	NA	18.7983	18.5842	NA	21.7787	21.4833	NA	Cell	2.93977	20.1611	6.42224	0.00264115	0.0294192	-0.844855
Cnnm3	19.5524	21.0085	20.8731	NA	23.365	23.9379	NA	Cell	3.0846	21.7474	5.40524	0.00266137	0.0294701	-1.03883
Lasp1	22.7309	24.3684	24.1601	18.5754	20.0871	21.595	NA	Cell	-3.66726	21.9195	-4.84737	0.00266036	0.0294701	-1.24332
Pdlim7	NA	21.059	21.7362	NA	24.6922	24.5291	NA	Cell	3.21308	23.0041	6.40343	0.00267105	0.0294701	-0.855669
Synrg	19.6665	19.695	20.2976	21.9356	21.205	22.2702	NA	Cell	1.91726	20.845	4.8436	0.00267079	0.0294701	-1.24741
Mfap1	20.4709	21.015	21.3312	16.9778	NA	NA	NA	Cell	-3.87131	19.9487	-6.39004	0.00269258	0.0296375	-0.88019
Actr10	21.8585	22.343	22.6708	17.6583	20.3461	19.4225	NA	Cell	-3.14845	20.7165	-4.80066	0.0027929	0.0296613	-1.29411
Btf3	26.2811	26.7904	26.8293	24.3283	20.6063	22.2761	NA	Cell	-4.23004	24.5186	-4.81457	0.00275268	0.0296613	-1.27895
Bysl	23.6385	24.2342	24.2665	21.8203	22.7437	22.0461	NA	Cell	-1.84304	23.1249	-4.81686	0.00274612	0.0296613	-1.27646
Ftl1	26.1077	26.7788	26.6114	28.1999	28.2272	27.9722	NA	Cell	1.63386	27.3162	4.80273	0.00278689	0.0296613	-1.29186
Lsm3	24.5217	23.8863	23.7943	22.354	20.412	19.436	NA	Cell	-3.3334	22.4007	-4.81876	0.00274069	0.0296613	-1.2744
Marcksl1	26.1316	23.6836	24.0745	20.4982	NA	20.6377	NA	Cell	-4.15282	23.0051	-5.35045	0.00278576	0.0296613	-1.08569
Mrps14	21.3882	22.2121	22.4478	NA	19.6864	18.6551	NA	Cell	-2.90561	20.8779	-5.37839	0.00272151	0.0296613	-1.06174
Pcsk1	21.0148	21.7068	21.5949	23.0884	25.9144	25.567	NA	Cell	3.41777	23.1477	4.80529	0.00277944	0.0296613	-1.28906
Picalm	23.1013	23.8329	23.3263	20.7926	20.2039	21.8977	NA	Cell	-2.45542	22.1925	-4.80373	0.00278397	0.0296613	-1.29076
Pigt	21.0236	23.5881	23.4668	NA	18.3508	15.4213	NA	Cell	-5.96702	20.3701	-5.34035	0.00280941	0.0296613	-1.09437
Prdx2	28.4717	28.2799	28.1416	26.9273	25.2489	25.9819	NA	Cell	-2.24504	27.1752	-4.82202	0.0027314	0.0296613	-1.27085
Rtn3	25.7784	24.7973	25.0883	23.0847	23.5704	23.3469	NA	Cell	-1.88731	24.2777	-4.79934	0.00279677	0.0296613	-1.29556
Sfxn3	23.3132	23.4017	23.4411	20.0197	21.9855	20.2135	NA	Cell	-2.64579	22.0624	-4.81599	0.0027486	0.0296613	-1.2774
Srsf1	26.4057	26.2297	26.6535	27.7474	29.2395	29.045	NA	Cell	2.24763	27.5535	4.82079	0.00273491	0.0296613	-1.27219
Wdr81	NA	19.3523	19.5761	NA	23.4846	22.4957	NA	Cell	3.52596	21.2272	6.32444	0.00280121	0.0296613	-0.901509
A1cf	NA	21.1099	21.0169	NA	23.9591	23.8193	NA	Cell	2.82582	22.4763	6.30463	0.00283507	0.0297815	-0.913115
Fam115a	NA	20.9492	20.9532	NA	18.0809	18.1845	NA	Cell	-2.81849	19.542	-6.3083	0.00282875	0.0297815	-0.91096
Nat10	24.8614	24.9207	24.9555	21.4696	23.0312	23.1354	NA	Cell	-2.36717	23.729	-4.78252	0.00284638	0.0297815	-1.31393
Qsox2	22.6483	22.5677	22.5817	20.5546	20.8615	21.3746	NA	Cell	-1.66902	21.7647	-4.78365	0.00284302	0.0297815	-1.3127
Kpna1	22.2598	23.6931	23.4995	NA	19.7793	20.551	NA	Cell	-3.07115	21.9565	-5.30917	0.00288398	0.0298504	-1.12128
Mapk8	NA	21.2171	20.9059	NA	23.9225	23.9392	NA	Cell	2.86937	22.4961	6.28319	0.00287226	0.0298504	-0.925721
Mycbp	23.4093	23.7945	23.8298	21.9211	21.8192	22.4207	NA	Cell	-1.6242	22.8658	-4.77181	0.00287848	0.0298504	-1.32565
Nipsnap3b	23.057	23.4617	22.8737	21.5244	21.5647	21.6276	NA	Cell	-1.55856	22.3515	-4.76965	0.00288503	0.0298504	-1.32803
Rangap1	25.977	26.4498	26.5716	23.3333	24.9369	24.1483	NA	Cell	-2.19328	25.2362	-4.77767	0.00286087	0.0298504	-1.31924
Bcr	19.2601	19.5023	19.2162	17.4708	16.0943	17.5939	NA	Cell	-2.2732	18.1896	-4.7555	0.00292819	0.0299736	-1.34355
Dnajc9	25.34	24.6869	25.0081	23.0791	22.7507	21.0075	NA	Cell	-2.73254	23.6454	-4.7573	0.00292266	0.0299736	-1.34157
Gnpnat1	NA	NA	18.5047	NA	23.697	23.825	NA	Cell	5.26864	22.0089	8.37839	0.00292912	0.0299736	-0.938825
Med12	NA	21.058	21.0028	NA	23.9932	23.7343	NA	Cell	2.83332	22.4471	6.2567	0.00291904	0.0299736	-0.941364
Wbp11	23.5861	23.821	24.0577	22.2486	19.9394	20.5717	NA	Cell	-2.90173	22.3708	-4.75839	0.00291929	0.0299736	-1.34037
Med1	21.7845	22.6714	22.444	23.8464	25.0491	24.1101	NA	Cell	2.03526	23.3176	4.75	0.00294514	0.0300714	-1.34958
Cadm1	22.869	22.7243	22.7122	19.5385	NA	NA	NA	Cell	-3.24933	21.961	-6.23269	0.00296226	0.0301801	-0.966174
Pcyt1a	22.3531	21.7257	22.0167	20.5712	19.7323	18.7826	NA	Cell	-2.3365	20.8636	-4.7416	0.00297129	0.0302059	-1.35883
Mybbp1a	28.221	27.7478	27.9514	26.7647	26.048	26.1924	NA	Cell	-1.63835	27.1542	-4.73685	0.00298619	0.0302913	-1.36406
Fam107b	NA	14.1449	15.9625	NA	19.6479	21.7421	NA	Cell	5.64127	17.8744	6.20482	0.00301339	0.0304493	-0.972234
Hnrnpu	28.9527	28.8188	29.0456	25.1357	26.9178	27.0326	NA	Cell	-2.57702	27.6505	-4.72368	0.00302792	0.0304493	-1.37857
Pno1	22.7514	23.6365	23.6106	NA	21.1548	20.8772	NA	Cell	-2.37265	22.4061	-5.25225	0.00302606	0.0304493	-1.17075
Taldo1	26.8812	26.8554	26.8184	28.747	28.5066	28.0438	NA	Cell	1.58082	27.6421	4.72403	0.0030268	0.0304493	-1.37819
Clint1	24.8165	24.9891	25.1381	26.8705	26.2772	26.5378	NA	Cell	1.58059	25.7715	4.72007	0.00303949	0.0304997	-1.38256
Hspa9	28.863	29.3035	29.1936	27.2906	26.9341	27.8597	NA	Cell	-1.75851	28.2407	-4.71106	0.00306854	0.0305934	-1.39251
Llgl1	23.0266	23.5512	23.2601	21.8896	20.2413	20.3566	NA	Cell	-2.45014	22.0542	-4.7126	0.00306356	0.0305934	-1.39081
Pkp4	20.863	19.738	19.7957	17.735	12.9758	14.7881	NA	Cell	-4.96594	17.6493	-4.71328	0.00306135	0.0305934	-1.39005
Itpa	23.5023	23.2462	23.0986	21.9109	21.1003	21.7644	NA	Cell	-1.69051	22.4371	-4.70888	0.00307562	0.0305985	-1.39492
Eftud2	27.3062	27.6286	27.699	26.2413	25.9158	25.7339	NA	Cell	-1.58094	26.7541	-4.7022	0.00309743	0.0306192	-1.40231
Hint1	25.295	25.7294	25.3071	26.9565	27.13	26.7843	NA	Cell	1.51314	26.2004	4.70616	0.00308448	0.0306192	-1.39793
Npm1	28.7958	27.8871	28.3622	30.1807	30.0709	29.8745	NA	Cell	1.69367	29.1952	4.7037	0.0030925	0.0306192	-1.40065
Rnaset2	NA	22.4498	22.0753	NA	18.7736	19.4217	NA	Cell	-3.1649	20.6801	-6.15443	0.00310862	0.0306647	-1.00251
Emc1	24.6855	25.1973	25.0208	22.8765	23.1688	23.7379	NA	Cell	-1.70678	24.1145	-4.68751	0.00314598	0.0308476	-1.41858
Psen1	21.3752	21.7091	21.5209	NA	18.4415	19.5976	NA	Cell	-2.53087	20.5289	-5.2062	0.00314704	0.0308476	-1.21113
Tcf3	21.5859	21.1958	21.2065	19.3819	NA	18.0329	NA	Cell	-2.63482	20.2806	-5.20882	0.00314	0.0308476	-1.20882
Camk2g	22.7428	22.0261	21.9477	23.7248	24.2065	24.0978	NA	Cell	1.77085	23.1243	4.67955	0.00317264	0.0308585	-1.42741
Cdk7	NA	24.4771	24.5247	NA	19.4373	21.1064	NA	Cell	-4.22898	22.3864	-6.12532	0.0031653	0.0308585	-1.02013
Mcat	22.8566	23.6762	23.6756	21.233	19.5715	21.3752	NA	Cell	-2.67623	22.0647	-4.67895	0.00317466	0.0308585	-1.42808
Mrpl15	21.5788	21.2346	21.273	18.4686	19.2736	19.9674	NA	Cell	-2.12561	20.2994	-4.68033	0.00317003	0.0308585	-1.42655
Ddx6	26.0644	26.324	26.1787	24.9448	24.4737	24.0058	NA	Cell	-1.71426	25.3319	-4.67646	0.00318305	0.0308756	-1.43084
Ubqln4	22.7017	23.9752	23.4321	21.0791	21.8761	21.2721	NA	Cell	-1.96056	22.3894	-4.65101	0.00327037	0.0316566	-1.45916
Rab10	25.4856	24.0572	23.8917	22.7444	21.8468	21.9778	NA	Cell	-2.2885	23.3339	-4.64527	0.00329044	0.0317848	-1.46556
Slc12a4	NA	22.7148	22.7658	NA	19.8507	18.7521	NA	Cell	-3.43892	21.0208	-6.05367	0.00331029	0.0319103	-1.06392
Bst2	23.8707	23.4827	23.6555	24.9513	26.0263	25.5262	NA	Cell	1.8316	24.5854	4.63604	0.00332299	0.0319666	-1.47586
Rcsd1	20.4531	21.3756	21.3697	19.0834	17.9211	16.4887	NA	Cell	-3.23508	19.4486	-4.63394	0.00333044	0.0319722	-1.47821
Tst	24.5844	25.4256	25.3675	23.617	22.8599	23.2409	NA	Cell	-1.88654	24.1825	-4.62226	0.00337228	0.0323073	-1.49128
Rpl4	28.3625	29.0538	29.0218	26.9677	27.3999	27.2705	NA	Cell	-1.60003	28.0127	-4.61632	0.00339376	0.0324463	-1.49793
Mettl13	20.0381	21.7112	21.0839	NA	24.2052	23.7124	NA	Cell	2.92739	22.1502	5.10914	0.00342089	0.0325719	-1.29726
Mphosph10	22.5864	22.961	23.1211	21.0324	20.3138	21.5719	NA	Cell	-1.91679	21.9311	-4.61038	0.0034154	0.0325719	-1.50458
Fndc3a	NA	22.0136	21.9756	NA	24.6258	24.7214	NA	Cell	2.67905	23.3341	5.9941	0.00343702	0.0326587	-1.10079
Hbz	30.0322	29.7802	29.6806	28.5343	27.3794	28.1621	NA	Cell	-1.80576	28.9281	-4.59459	0.00347373	0.0329403	-1.52231
Ndufs8	24.0296	24.0184	24.2908	22.3316	21.4227	19.7887	NA	Cell	-2.93197	22.647	-4.59	0.00349086	0.0330355	-1.52747
DBIRDcomplexsubunitKIAA1967homologOS=MusmusculusPE=1SV=2	25.4576	26.6407	26.5385	23.5219	24.785	23.7753	NA	Cell	-2.18486	25.1198	-4.58806	0.00349815	0.0330373	-1.52965
Idh3b	25.9275	26.5118	26.3965	24.4649	24.9336	23.7377	NA	Cell	-1.89987	25.3287	-4.58229	0.00351992	0.0331756	-1.53615
Acadvl	26.7698	26.428	26.4295	28.0683	27.8017	28.093	NA	Cell	1.44526	27.265	4.5658	0.00358291	0.0334309	-1.55472
Dgcr8	NA	19.1686	19.4163	NA	21.8704	22.4696	NA	Cell	2.8776	20.7312	5.93346	0.00357215	0.0334309	-1.13874
Podxl	22.3955	23.6907	23.6794	18.8352	21.122	20.9432	NA	Cell	-2.95505	21.7777	-4.57123	0.00356203	0.0334309	-1.5486
Sepsecs	NA	20.8337	20.8422	NA	17.5054	18.2288	NA	Cell	-2.97092	19.3525	-5.9288	0.00358279	0.0334309	-1.14167
Stx16	21.133	21.526	22.0871	16.3418	19.3684	15.1121	NA	Cell	-4.64125	19.2614	-4.57294	0.00355549	0.0334309	-1.54668
Mrpl2	21.2381	21.3871	21.5846	18.3761	20.1359	19.0893	NA	Cell	-2.2028	20.3019	-4.55715	0.00361651	0.0336769	-1.5645
Ddx18	24.1968	24.5841	24.8203	23.1968	21.5787	21.9805	NA	Cell	-2.28177	23.3929	-4.55178	0.00363752	0.033805	-1.57057
Leprel4	22.4624	22.3346	22.333	18.7071	20.5648	20.4648	NA	Cell	-2.4644	21.1445	-4.54459	0.00366587	0.033933	-1.5787
Trmt112	24.2577	24.5554	24.4972	21.4373	20.926	23.1124	NA	Cell	-2.61155	23.131	-4.54577	0.00366118	0.033933	-1.57736
Ndufaf4	NA	25.5069	26.9769	NA	21.497	22.703	NA	Cell	-4.1419	24.1709	-5.88989	0.00367324	0.0339337	-1.16628
Xrcc1	NA	20.5488	20.9975	NA	11.6672	15.3525	NA	Cell	-7.26327	17.1415	-5.88242	0.00369092	0.0340296	-1.17102
Elmsan1	NA	19.3902	19.6202	NA	14.7447	16.3589	NA	Cell	-3.95344	17.5285	-5.87831	0.00370071	0.0340524	-1.17364
Arid2	21.9588	22.9099	23.212	21.0127	19.2147	19.5878	NA	Cell	-2.75521	21.316	-4.53009	0.00372379	0.0341331	-1.59513
Elp3	24.4179	25.6803	25.5006	22.1052	23.4265	23.3963	NA	Cell	-2.22358	24.0878	-4.52286	0.00375306	0.0341331	-1.60333
H1fx	25.887	26.0731	26.3027	24.1813	23.4997	21.6204	NA	Cell	-2.98712	24.594	-4.52597	0.00374045	0.0341331	-1.59981
Rbbp4	26.8082	27.4314	27.3342	25.6904	25.4691	25.7863	NA	Cell	-1.54266	26.4199	-4.52971	0.00372532	0.0341331	-1.59556
Shroom2	20.2381	19.9323	20.071	16.8046	18.2028	18.4795	NA	Cell	-2.25152	18.9547	-4.52276	0.00375346	0.0341331	-1.60345
Tnpo3	23.7286	23.3437	23.1529	21.5129	20.12	NA	NA	Cell	-2.61648	22.3716	-5.00835	0.0037351	0.0341331	-1.38819
Derl1	21.7143	21.855	21.9607	NA	23.5775	24.4699	NA	Cell	2.16798	22.7155	4.99512	0.00377876	0.0342961	-1.40024
Atp5d	27.393	25.7825	26.4863	22.5244	21.2952	24.6137	NA	Cell	-3.74281	24.6825	-4.50316	0.00383414	0.0346636	-1.62573
Mtx2	22.9471	23.9198	24.2105	21.8258	20.9962	19.8763	NA	Cell	-2.79304	22.2959	-4.50418	0.0038299	0.0346636	-1.62457
Bag3	21.5746	21.09	21.35	22.6936	22.7293	23.3387	NA	Cell	1.58229	22.1294	4.49361	0.00387412	0.0348896	-1.6366
UncharacterizedproteinC19orf52homologOS=MusmusculusPE=2SV=1	20.8665	21.3565	21.2702	NA	17.9994	NA	NA	Cell	-3.2019	20.3732	-5.81045	0.00386671	0.0348896	-1.21104
Elmod2	NA	23.7325	23.0737	NA	26.3067	27.0741	NA	Cell	3.28727	25.0467	5.79922	0.00389505	0.0350104	-1.22434
Eif3g	25.3206	25.5063	25.6914	23.327	23.616	24.4196	NA	Cell	-1.71855	24.6468	-4.48563	0.00390791	0.0350582	-1.6457
Lsm7	23.2372	23.3738	22.9436	20.9988	20.5478	21.9571	NA	Cell	-2.01696	22.1764	-4.47368	0.00395913	0.0354495	-1.65936
Cd2bp2	21.4807	22.277	21.8006	NA	19.8279	19.8171	NA	Cell	-2.06597	21.0407	-4.93536	0.00398364	0.0354643	-1.45501
Dhx35	NA	22.1041	22.1813	NA	24.6121	25.0824	NA	Cell	2.7045	23.495	5.76526	0.00398229	0.0354643	-1.24634
Yars	25.8929	25.3174	25.4911	27.0878	27.1725	26.8797	NA	Cell	1.47951	26.3069	4.47069	0.0039721	0.0354643	-1.66278
Ddx10	19.9101	19.0761	19.7043	NA	17.2897	17.5491	NA	Cell	-2.11081	18.7058	-4.92846	0.0040081	0.0356139	-1.46136
Fhl1	NA	20.8916	21.8013	NA	24.6935	24.3566	NA	Cell	3.1786	22.9358	5.75223	0.00401639	0.0356196	-1.25482
Ang	NA	19.67	18.6628	NA	22.2708	22.6967	NA	Cell	3.31734	20.8251	5.72484	0.00408926	0.0357216	-1.27272
Clstn1	NA	20.416	20.6008	NA	25.2409	NA	NA	Cell	4.75029	22.0859	7.52169	0.00406444	0.0357216	-1.17857
Eif2b4	23.2897	23.9005	23.9463	20.0301	22.3601	20.0333	NA	Cell	-2.90433	22.26	-4.44636	0.0040791	0.0357216	-1.69065
Fth1	23.4038	24.4198	24.8327	25.8304	26.2836	26.321	NA	Cell	1.92619	25.1819	4.44887	0.0040679	0.0357216	-1.68777
Nop58	25.1536	25.4528	25.5252	30.0564	27.2018	28.2354	NA	Cell	3.12066	26.9375	4.44578	0.00408169	0.0357216	-1.69132
Sco1	NA	21.4676	21.4115	NA	23.998	23.9972	NA	Cell	2.55814	22.7186	5.73639	0.00405833	0.0357216	-1.26516
Zbed3	NA	19.0438	19.2862	NA	NA	14.4181	NA	Cell	-4.77018	17.5827	-7.50889	0.00408541	0.0357216	-1.18251
Copb2	26.104	26.9982	26.9113	32.1448	29.6511	29.0952	NA	Cell	3.62583	28.4841	4.44096	0.00410329	0.035777	-1.69685
Celf2	23.517	23.739	23.8857	20.2742	22.0326	21.9781	NA	Cell	-2.28555	22.5711	-4.4361	0.00412521	0.0358394	-1.70244
Krt78	26.6829	25.3958	25.1606	28.5655	27.9985	27.3206	NA	Cell	2.21505	26.854	4.43426	0.00413354	0.0358394	-1.70455
Sephs1	23.3666	24.6044	24.0496	22.0246	18.6264	19.3602	NA	Cell	-4.00311	22.0053	-4.43498	0.00413026	0.0358394	-1.70372
G3bp2	25.1094	24.2864	24.6635	21.1642	22.0485	23.2282	NA	Cell	-2.53943	23.4167	-4.42771	0.00416334	0.0358785	-1.71208
Hsdl1	22.657	23.1268	22.942	21.3825	18.5629	19.1484	NA	Cell	-3.21066	21.3033	-4.42804	0.00416182	0.0358785	-1.7117
Nudt5	22.6407	22.4732	22.643	19.984	17.1027	NA	NA	Cell	-4.03678	20.9687	-4.88143	0.00417964	0.0358785	-1.5049
Setd1a	20.2143	21.6731	21.5574	NA	18.0398	14.946	NA	Cell	-4.74503	19.2861	-4.89009	0.00414743	0.0358785	-1.49686
Snrpe	25.8973	26.3964	26.1379	23.8315	25.0646	23.6809	NA	Cell	-1.95154	25.1681	-4.42527	0.00417449	0.0358785	-1.71489
Cops6	24.9279	25.3706	25.1595	23.6275	23.994	23.3609	NA	Cell	-1.49188	24.4068	-4.42015	0.00419801	0.03593	-1.72078
Txndc9	NA	21.5029	21.2776	NA	NA	16.6577	NA	Cell	-4.71092	19.8127	-7.42974	0.00421836	0.0360379	-1.2071
Gna13	22.843	21.5336	21.599	19.3573	18.9203	20.4146	NA	Cell	-2.42777	20.778	-4.41072	0.00424174	0.0360538	-1.73165
Ndufb6	NA	22.6252	23.5526	NA	20.0096	19.2268	NA	Cell	-3.47067	21.3535	-5.66603	0.00425119	0.0360538	-1.31146
UPF0668proteinC10orf76homologOS=MusmusculusPE=2SV=2	20.3237	20.0115	20.7927	NA	22.5187	22.3649	NA	Cell	2.0608	21.2023	4.86432	0.00424415	0.0360538	-1.52083
Paics	25.5617	26.2561	26.3324	24.4464	24.2715	23.1519	NA	Cell	-2.09352	25.0033	-4.40638	0.00426206	0.0360803	-1.73666
Mcm6	27.0908	27.4355	27.3307	26.03	25.4937	25.9127	NA	Cell	-1.47355	26.5489	-4.39374	0.00432182	0.0365198	-1.75126
Nsfl1c	26.1358	26.5429	26.637	25.0618	24.7242	25.1306	NA	Cell	-1.46636	25.7054	-4.38905	0.00434421	0.0366425	-1.75668
Heatr5a	NA	20.5541	20.2508	NA	23.0336	23.9293	NA	Cell	3.07902	21.942	5.62837	0.004359	0.0367007	-1.3365
Afp	29.8017	29.7929	29.7964	31.9077	30.9304	31.346	NA	Cell	1.59777	30.5959	4.3824	0.00437619	0.0367274	-1.76438
Gars	25.9309	26.482	26.4887	28.6126	27.881	27.6906	NA	Cell	1.76086	27.1809	4.37878	0.00439372	0.0367274	-1.76857
Smarca4	26.0487	26.1828	26.2607	23.9875	25.028	24.5903	NA	Cell	-1.62876	25.3497	-4.37929	0.00439126	0.0367274	-1.76798
Trip10	NA	21.0826	21.5027	NA	15.2025	17.6015	NA	Cell	-4.89066	18.8473	-5.61839	0.00438812	0.0367274	-1.34317
Cobra1	22.9894	23.4572	23.342	21.9199	21.9596	21.579	NA	Cell	-1.44337	22.5412	-4.37598	0.00440734	0.036736	-1.77182
Vwa8	23.6062	24.7121	24.6679	21.8312	22.6783	22.7888	NA	Cell	-1.89597	23.3807	-4.37532	0.00441053	0.036736	-1.77258
Fam98b	24.4911	24.8088	24.8781	22.529	20.5432	22.8947	NA	Cell	-2.73706	23.3575	-4.37334	0.00442019	0.0367507	-1.77487
Itga6	26.3342	27.0105	27.0899	28.194	29.3271	28.4077	NA	Cell	1.8314	27.7272	4.35794	0.00449617	0.0373158	-1.79275
Ankle2	NA	23.6556	23.1883	NA	20.9624	20.4422	NA	Cell	-2.71968	22.0621	-5.56947	0.00453434	0.0375657	-1.37603
Gtf2f2	NA	21.2065	21.1585	NA	18.5084	17.2732	NA	Cell	-3.29171	19.5367	-5.56099	0.00456029	0.0376467	-1.38176
Sqstm1	NA	21.0101	20.8345	NA	18.4215	18.4275	NA	Cell	-2.4978	19.6734	-5.56157	0.00455849	0.0376467	-1.38136
Coq6	NA	31.664	31.5178	NA	28.9329	27.6937	NA	Cell	-3.27756	29.9521	-5.55141	0.0045898	0.0378232	-1.38824
Anapc7	NA	21.0271	21.3419	NA	17.1251	18.4672	NA	Cell	-3.38831	19.4903	-5.5417	0.00461999	0.0380047	-1.39482
40787	26.3029	26.7374	26.8418	24.9914	25.1315	25.4464	NA	Cell	-1.43762	25.9086	-4.33174	0.00462876	0.0380097	-1.82324
Brix1	NA	22.8241	22.7447	NA	20.2228	19.1337	NA	Cell	-3.10615	21.2313	-5.53034	0.00465559	0.0381627	-1.40254
Otud4	23.5473	23.3407	23.3024	NA	20.3815	21.6493	NA	Cell	-2.36696	22.4442	-4.759	0.00466763	0.0381942	-1.61985
Ehd4	22.7054	23.9106	23.8991	29.6033	26.7277	26.2297	NA	Cell	4.01516	25.5126	4.31512	0.00471517	0.0382471	-1.84265
Erbb2ip	22.0109	22.4061	22.2908	NA	20.4882	19.1156	NA	Cell	-2.4556	21.2623	-4.75264	0.00469471	0.0382471	-1.62588
Pafah1b2	24.1323	24.5802	24.4367	22.4275	20.4654	22.5216	NA	Cell	-2.57823	23.094	-4.31522	0.00471462	0.0382471	-1.84253
Ppwd1	23.4445	24.1976	24.2776	21.3008	22.7823	21.8901	NA	Cell	-1.98215	22.9822	-4.31577	0.00471176	0.0382471	-1.84189
Ranbp9	NA	22.2503	22.1099	NA	19.8244	19.3784	NA	Cell	-2.57869	20.8908	-5.5207	0.00468604	0.0382471	-1.4091
Gatad2a	23.7299	24.3885	24.3996	18.1176	21.1193	21.8654	NA	Cell	-3.80522	22.27	-4.31257	0.00472855	0.0382889	-1.84562
Ablim1	NA	18.871	19.5043	NA	15.4974	13.3688	NA	Cell	-4.75453	16.8104	-5.49671	0.00476294	0.0383152	-1.42548
Ccnk	21.942	22.2907	22.7697	NA	20.1376	20.536	NA	Cell	-2.03496	21.5352	-4.74033	0.0047477	0.0383152	-1.63758
Elmo1	19.7327	20.0498	21.0963	22.5378	21.7096	22.7179	NA	Cell	2.02881	21.3074	4.30296	0.00477953	0.0383152	-1.85688
Mrfap1	23.2481	24.3794	24.611	NA	21.8773	20.8283	NA	Cell	-2.80651	22.9888	-4.72904	0.00479689	0.0383152	-1.64833
Pbld1	NA	18.5313	19.0717	NA	21.2609	21.6916	NA	Cell	2.67473	20.1389	5.48604	0.00479763	0.0383152	-1.43279
Shmt1	23.9795	25.5137	25.6641	22.9072	21.7209	22.8803	NA	Cell	-2.54966	23.7776	-4.30858	0.00474967	0.0383152	-1.8503
Pdhx	NA	24.5206	24.698	NA	NA	20.1417	NA	Cell	-4.48462	23.1201	-7.10561	0.00482553	0.038472	-1.3125
Rps27a	NA	28.4897	28.5127	NA	31.0267	30.8759	NA	Cell	2.45016	29.7262	5.46458	0.00486832	0.0387469	-1.44754
Cdk2	21.4763	22.8686	22.9715	NA	19.9273	19.8539	NA	Cell	-2.64065	21.4195	-4.70419	0.00490729	0.0388991	-1.67208
Srsf3	25.6275	25.5017	25.1998	27.0671	27.8784	26.6224	NA	Cell	1.74628	26.3162	4.28119	0.00489719	0.0388991	-1.8824
Syt1	NA	21.5441	21.8907	NA	24.3185	24.1702	NA	Cell	2.52696	22.9809	5.45135	0.00491252	0.0388991	-1.45666
Mtmr12	19.0319	18.2517	18.584	16.9593	12.8379	13.1524	NA	Cell	-4.30599	16.4695	-4.27488	0.00493192	0.0389864	-1.88982
Tf	NA	21.4473	21.0046	NA	24.7392	23.7205	NA	Cell	3.00389	22.7279	5.43457	0.00496932	0.0391492	-1.46827
Zfp568	NA	19.0517	18.9901	NA	15.7119	13.5968	NA	Cell	-4.36655	16.8376	-5.43684	0.00496158	0.0391492	-1.46669
Mpdz	NA	20.4363	20.5965	NA	23.2029	22.8637	NA	Cell	2.5169	21.7749	5.43001	0.00498488	0.0392054	-1.47143
Fbxo3	NA	23.3508	23.6105	NA	21.0438	20.3071	NA	Cell	-2.80519	22.078	-5.42369	0.00500656	0.0392983	-1.47581
Gfer	NA	21.4192	21.8318	NA	18.6043	19.2512	NA	Cell	-2.69778	20.2767	-5.42165	0.00501357	0.0392983	-1.47722
Klhdc4	NA	18.8727	19.5598	NA	22.8211	21.96	NA	Cell	3.17434	20.8034	5.41317	0.00504288	0.0394616	-1.48312
Endog	NA	26.0851	24.2744	NA	21.5922	20.1858	NA	Cell	-4.29074	23.0344	-5.4056	0.00506923	0.0395409	-1.48839
Etfdh	24.5107	25.2982	25.377	26.2374	26.8302	27.2533	NA	Cell	1.71171	25.9178	4.24877	0.0050785	0.0395409	-1.92056
Nup93	26.294	26.6535	26.7253	24.5197	25.5199	24.8432	NA	Cell	-1.59666	25.7593	-4.24967	0.00507331	0.0395409	-1.91949
Rras2	21.9424	22.7932	22.7853	NA	25.2392	24.4375	NA	Cell	2.27714	23.4395	4.66294	0.00509708	0.0396194	-1.71169
Casp8	NA	24.8512	24.8057	NA	22.1425	20.7378	NA	Cell	-3.38826	23.1343	-5.38919	0.00512692	0.0397849	-1.49984
Cgn	25.2912	26.1395	26.1919	24.0928	24.1358	24.5849	NA	Cell	-1.60306	25.0727	-4.23259	0.00517174	0.0399727	-1.93966
Notch2	21.4752	22.3087	22.5125	19.984	18.8712	20.6339	NA	Cell	-2.26911	20.9643	-4.23309	0.00516882	0.0399727	-1.93906
Smad1	NA	20.6311	21.0485	NA	23.3126	23.3587	NA	Cell	2.49583	22.0877	5.37516	0.00517688	0.0399727	-1.50966
Adk	NA	25.2937	24.753	NA	27.52	27.8461	NA	Cell	2.65967	26.3532	5.36683	0.0052068	0.0400289	-1.51549
Bdh1	NA	22.7889	22.5792	NA	19.7815	20.3384	NA	Cell	-2.62413	21.372	-5.37008	0.00519508	0.0400289	-1.51321
Elac2	21.8026	22.2052	22.4529	20.6618	20.5818	19.4279	NA	Cell	-1.92973	21.1887	-4.2256	0.00521266	0.0400289	-1.94793
Man1a1	NA	22.5479	21.5639	NA	24.9242	25.287	NA	Cell	3.04971	23.5808	5.36358	0.00521855	0.0400289	-1.51778
Pygl	22.2447	21.3799	21.3592	23.7564	26.7361	28.3399	NA	Cell	4.61617	23.9694	4.22136	0.00523759	0.0401089	-1.95294
Cuzd1	21.0442	24.1679	23.8554	29.8459	26.682	27.2312	NA	Cell	4.89719	25.4711	4.21749	0.00526053	0.0401598	-1.95753
Rpl22l1	25.1135	24.687	25.3386	27.6166	26.6165	26.3824	NA	Cell	1.82549	25.9591	4.21733	0.00526149	0.0401598	-1.95772
Smarcd3	22.2732	22.7584	22.6197	NA	20.4668	20.9267	NA	Cell	-1.88033	21.809	-4.62555	0.00527644	0.040208	-1.74783
Gtf3c1	23.2806	23.0084	23.3681	21.7718	21.8719	20.7246	NA	Cell	-1.76291	22.3376	-4.21063	0.0053014	0.0403262	-1.96565
Tecr	24.8845	25.9396	26.1339	23.4174	22.6247	24.2184	NA	Cell	-2.23243	24.5364	-4.20932	0.00530927	0.0403262	-1.96721
Mrpl19	23.4006	23.2816	23.56	22.2048	20.5458	19.8144	NA	Cell	-2.55904	22.1346	-4.2077	0.00531899	0.0403342	-1.96913
Impad1	23.7785	24.1018	23.8089	19.7765	22.6488	19.9974	NA	Cell	-3.08885	22.352	-4.20624	0.00532779	0.0403353	-1.97087
Vat1	24.4677	25.1541	24.9721	25.9375	27.9796	27.9605	NA	Cell	2.42794	26.0786	4.1994	0.00536915	0.0405824	-1.97899
Fndc3b	NA	22.0362	22.6052	NA	26.1593	25.0433	NA	Cell	3.28063	23.961	5.31211	0.00540873	0.0406078	-1.5541
Kif23	21.2951	21.7694	22.1328	NA	23.5784	24.944	NA	Cell	2.48674	22.744	4.5991	0.0054078	0.0406078	-1.77355
Med7	NA	21.055	21.3812	NA	24.7134	23.7291	NA	Cell	3.00324	22.7197	5.31371	0.00540271	0.0406078	-1.55296
Peg3	23.3712	23.1998	23.4635	22.184	21.9242	21.2342	NA	Cell	-1.564	22.5628	-4.19479	0.00539721	0.0406078	-1.98446
Vdac3	25.4022	25.6425	25.5023	28.1735	27.2087	26.7191	NA	Cell	1.85143	26.4414	4.1917	0.00541612	0.0406078	-1.98813
Slc25a51	19.5553	19.981	20.1678	18.0615	18.6631	18.6148	NA	Cell	-1.45489	19.1739	-4.18653	0.00544793	0.0407152	-1.99428
Stom	22.3556	23.4045	23.4423	25.4387	25.0484	27.7345	NA	Cell	3.00639	24.5707	4.18692	0.00544552	0.0407152	-1.99381
Pabpc4l	NA	20.8218	20.695	NA	16.4861	NA	NA	Cell	-4.28444	19.3343	-6.81379	0.00547303	0.0408372	-1.41426
Sec22b	26.4241	26.1854	26.4005	25.16	25.0762	24.8832	NA	Cell	-1.29689	25.6882	-4.17787	0.00550167	0.0409853	-2.00458
Trim56	21.064	21.2086	21.2819	22.6449	22.8086	22.2306	NA	Cell	1.37654	21.8731	4.16941	0.00555475	0.0413146	-2.01467
Nampt	21.9349	21.5662	21.5389	23.1273	23.5087	22.775	NA	Cell	1.45699	22.4085	4.16273	0.00559706	0.0414967	-2.02263
Acsf2	25.5679	26.1839	26.4776	22.36	23.2518	24.8736	NA	Cell	-2.58134	24.7858	-4.16055	0.00561095	0.041509	-2.02524
Akr1c19	23.6843	23.9955	23.652	22.563	20.8118	20.0252	NA	Cell	-2.64392	22.4553	-4.1562	0.00563879	0.041509	-2.03043
Dhfr	23.1923	23.7625	23.5821	22.0098	22.0027	22.3617	NA	Cell	-1.38752	22.8185	-4.15224	0.00566425	0.041509	-2.03516
Dhx40	NA	19.1767	19.2053	NA	14.9655	NA	NA	Cell	-4.22274	17.7825	-6.74067	0.00565274	0.041509	-1.44084
Enah	23.8214	24.7083	24.4734	22.0815	22.4211	19.8828	NA	Cell	-2.87256	22.8981	-4.15134	0.00567005	0.041509	-2.03624
Fhl3	19.8746	20.7595	19.3145	21.4222	24.2651	23.5246	NA	Cell	3.08778	21.5268	4.1529	0.00565999	0.041509	-2.03437
Gmppa	21.7181	22.0361	22.0307	25.5861	23.896	23.4935	NA	Cell	2.39685	23.1268	4.15268	0.00566138	0.041509	-2.03463
Mms19	21.5778	22.3144	22.5743	18.6135	14.3066	NA	NA	Cell	-5.65525	19.8773	-4.55811	0.00561884	0.041509	-1.81361
Cpne8	NA	21.2284	20.1637	NA	23.59	23.7543	NA	Cell	2.97608	22.1841	5.24153	0.00568342	0.0415416	-1.60449
Atic	26.8877	27.2288	27.0739	26.053	24.731	24.7139	NA	Cell	-1.89747	26.1147	-4.14077	0.00573875	0.0416128	-2.04888
B3galtl	NA	20.9896	21.2747	NA	18.539	17.2765	NA	Cell	-3.22443	19.52	-5.22069	0.00576777	0.0416128	-1.61951
Bag2	22.9845	23.567	23.5553	21.7077	21.7932	20.1902	NA	Cell	-2.13854	22.2997	-4.1427	0.00572609	0.0416128	-2.04657
Baiap2	NA	20.2137	20.1477	NA	17.7109	16.4861	NA	Cell	-3.08219	18.6396	-5.23107	0.00572556	0.0416128	-1.61202
Cbs	23.2002	23.7181	23.527	25.1728	25.8726	24.5744	NA	Cell	1.72487	24.3442	4.13861	0.00575289	0.0416128	-2.05147
Cox7a2l	NA	21.8901	21.8394	NA	NA	17.6545	NA	Cell	-4.20543	20.4613	-6.71017	0.00572997	0.0416128	-1.45206
Cul4a	23.702	23.2703	23.5136	21.2434	22.4701	21.2421	NA	Cell	-1.84347	22.5736	-4.13546	0.00577359	0.0416128	-2.05524
Gemin4	23.2344	23.8304	23.858	22.2894	21.3483	20.2653	NA	Cell	-2.33991	22.471	-4.13776	0.00575845	0.0416128	-2.05248
Naalad2	23.5872	24.454	24.3311	25.7036	25.8841	25.4178	NA	Cell	1.5444	24.8963	4.13703	0.00576323	0.0416128	-2.05336
Otud3	NA	22.3728	22.4239	NA	19.6546	20.1888	NA	Cell	-2.47666	21.16	-5.20347	0.0058386	0.0418932	-1.63196
Tor2a	NA	21.8672	21.7216	NA	19.5834	19.0219	NA	Cell	-2.49172	20.5485	-5.20325	0.00583949	0.0418932	-1.63212
Fam162a	24.1962	24.5657	24.7024	23.332	21.3204	21.8937	NA	Cell	-2.30609	23.3351	-4.12141	0.00586693	0.0420253	-2.07208
Xpnpep2	NA	NA	17.1524	NA	21.9504	23.2129	NA	Cell	5.55042	20.7719	6.64255	0.00590612	0.042241	-1.47722
Ahcyl1	NA	23.3072	23.9308	NA	26.2571	26.0928	NA	Cell	2.55597	24.897	5.1696	0.00598097	0.0427107	-1.65657
Fgfr1op2	NA	19.102	19.6334	NA	14.8173	16.5806	NA	Cell	-3.66876	17.5334	-5.16617	0.00599563	0.0427498	-1.65907
Uqcrq	NA	23.7162	22.5525	NA	17.9147	NA	NA	Cell	-5.33146	21.3945	-6.6018	0.00601569	0.0428273	-1.49257
Krt2	25.5034	25.1848	25.5391	26.4134	27.0373	27.3639	NA	Cell	1.52911	26.1737	4.09815	0.00602522	0.0428296	-2.10004
Mtr	22.8822	23.3506	23.3052	24.8643	24.2279	25.2944	NA	Cell	1.61622	23.9874	4.09595	0.00604044	0.0428724	-2.10269
Chmp2a	21.4398	24.2585	24.9112	NA	17.7623	19.7193	NA	Cell	-4.99704	21.6182	-4.4775	0.00606229	0.0428754	-1.89318
Copz1	24.6492	25.2354	25.0369	23.8563	22.0698	22.3408	NA	Cell	-2.21821	23.8648	-4.09446	0.0060508	0.0428754	-2.10449
Islr	24.8465	24.3729	24.4605	22.5996	23.4965	22.9011	NA	Cell	-1.56091	23.7795	-4.09018	0.00608054	0.0428754	-2.10964
Pih1d1	NA	22.6375	22.5923	NA	20.3815	19.5768	NA	Cell	-2.63573	21.297	-5.14292	0.00609611	0.0428754	-1.67607
Pmpcb	24.5794	24.7598	24.7582	23.4937	20.9853	21.948	NA	Cell	-2.5568	23.4207	-4.0908	0.00607623	0.0428754	-2.1089
Sdsl	NA	20.2693	19.5224	NA	23.2658	22.3221	NA	Cell	2.89804	21.3449	5.14458	0.00608887	0.0428754	-1.67486
Hp	NA	21.6873	22.055	NA	24.1171	24.9261	NA	Cell	2.65045	23.1964	5.13246	0.00614197	0.0431327	-1.68374
Akr1a1	25.7219	25.6813	25.5713	27.4737	28.7963	26.9105	NA	Cell	2.06865	26.6925	4.07337	0.00619912	0.0434685	-2.12992
Kpna3	25.2493	25.1517	25.3579	23.9584	20.9378	22.1875	NA	Cell	-2.89171	23.8071	-4.06718	0.0062434	0.0437132	-2.1374
Cand1	27.6174	27.6856	27.568	26.489	26.3534	25.5511	NA	Cell	-1.49249	26.8774	-4.0597	0.0062974	0.0440124	-2.14644
Pus7	22.6365	25.5553	25.9775	19.4014	22.0161	21.4139	NA	Cell	-3.77929	22.8334	-4.05865	0.00630505	0.0440124	-2.14772
Cdc27	22.5112	22.3007	22.2867	NA	NA	19.6754	NA	Cell	-2.67556	21.6935	-5.092	0.00632338	0.0440308	-1.68004
Uba1	28.1121	28.4305	28.3144	26.1717	27.3108	26.7133	NA	Cell	-1.55372	27.5088	-4.05569	0.00632659	0.0440308	-2.1513
Mrpl21	23.3115	23.529	23.3288	20.1319	20.5451	22.3428	NA	Cell	-2.38313	22.1982	-4.05335	0.00634371	0.0440841	-2.15414
Metap2	24.2963	24.7803	24.7936	25.5352	27.0358	26.9607	NA	Cell	1.88716	25.567	4.04999	0.00636833	0.0441892	-2.15821
Acadsb	23.0685	23.7506	23.8214	22.0963	19.0641	20.1603	NA	Cell	-3.10661	21.9935	-4.04793	0.00638348	0.0442284	-2.1607
Mat2a	24.9304	25.5587	25.3989	22.8575	22.9286	24.3229	NA	Cell	-1.92635	24.3328	-4.04461	0.00640798	0.0442664	-2.16473
Pcnt	20.6509	22.1613	22.5899	23.176	24.7907	25.1602	NA	Cell	2.57491	23.0882	4.04565	0.00640026	0.0442664	-2.16346
Acot2	23.2602	25.719	25.819	21.1524	22.3976	22.6346	NA	Cell	-2.87118	23.4971	-4.03623	0.00647032	0.0444385	-2.1749
Emc2	23.8018	24.2642	24.3097	22.9593	21.1406	20.6411	NA	Cell	-2.54492	22.8528	-4.03508	0.00647888	0.0444385	-2.17628
Irf2bp2	22.0765	24.3028	23.964	20.3044	20.6749	21.6629	NA	Cell	-2.56705	22.1643	-4.03485	0.00648062	0.0444385	-2.17657
Mrpl28	22.8814	22.5015	22.4596	15.0009	14.6641	20.5587	NA	Cell	-5.87292	19.6777	-4.03546	0.00647606	0.0444385	-2.17583
Top3a	NA	17.2119	19.197	NA	22.488	22.0634	NA	Cell	4.07122	20.2401	5.06221	0.00646109	0.0444385	-1.73568
Kif2a	24.4335	24.3561	24.5279	23.5244	22.0772	22.308	NA	Cell	-1.80263	23.5378	-4.02988	0.00651799	0.044629	-2.1826
Jmjd6	NA	19.5918	20.3378	NA	23.5758	22.5883	NA	Cell	3.11724	21.5234	5.04644	0.0065355	0.0446637	-1.74744
Cbll1	19.8696	20.5153	21.0404	NA	17.1127	NA	NA	Cell	-3.37011	19.6345	-5.03499	0.00659012	0.04475	-1.72034
Ddx24	22.7298	21.6277	21.5769	20.4927	17.6434	19.3556	NA	Cell	-2.81426	20.571	-4.02312	0.00656915	0.04475	-2.19082
Eef1g	28.862	28.7653	28.7557	27.5957	27.42	27.6839	NA	Cell	-1.2278	28.1804	-4.02113	0.00658433	0.04475	-2.19324
Etfa	27.4828	27.7898	27.596	25.5653	26.0022	26.6641	NA	Cell	-1.54564	26.8501	-4.01995	0.00659333	0.04475	-2.19467
Macf1	25.4718	24.8214	25.0229	26.2703	28.0623	28.53	NA	Cell	2.51548	26.3631	4.01703	0.00661564	0.0448361	-2.19822
Sh3gl1	25.8064	25.3776	25.7872	26.7828	27.5029	27.0313	NA	Cell	1.44859	26.3814	4.01425	0.00663703	0.0449148	-2.20161
Tbrg4	23.0321	23.8137	23.6539	18.0701	22.087	19.3405	NA	Cell	-3.66735	21.6662	-4.01301	0.00664654	0.0449148	-2.20312
Ptpn2	20.767	20.7287	21.8839	19.2325	17.5014	19.5124	NA	Cell	-2.37779	19.9376	-4.00973	0.00667189	0.0450208	-2.20712
Agk	23.8023	25.4201	25.4265	23.205	22.1013	21.8691	NA	Cell	-2.49118	23.6374	-4.00464	0.00671135	0.0452215	-2.21331
Cmpk1	24.3065	24.5526	24.3972	25.6399	25.895	25.4868	NA	Cell	1.25513	25.0463	3.99687	0.00677221	0.0455656	-2.22279
Cops7b	21.8205	22.9974	23.0246	19.9885	20.7733	21.3468	NA	Cell	-1.91128	21.6585	-3.98763	0.00684532	0.0457574	-2.23407
Fbl	25.2287	26.9388	27.2274	23.9423	24.478	24.466	NA	Cell	-2.16952	25.3802	-3.99059	0.00682182	0.0457574	-2.23046
Pebp1	27.0769	27.4139	27.0442	28.7731	32.9791	30.9929	NA	Cell	3.73667	29.0467	3.99046	0.00682282	0.0457574	-2.23061
Pofut1	23.1512	23.0951	23.2026	NA	21.4299	21.6539	NA	Cell	-1.60763	22.5065	-4.35049	0.00684556	0.0457574	-2.02072
Zc3h18	22.3283	21.9117	22.3695	19.7685	16.359	NA	NA	Cell	-4.12345	20.5474	-4.34984	0.00684985	0.0457574	-2.02138
Farsb	26.5902	26.3393	26.3143	25.0567	25.3979	24.9149	NA	Cell	-1.29143	25.7689	-3.9815	0.0068943	0.0458569	-2.24156
Snrpb2	22.9766	23.0028	23.1853	21.4079	NA	21.5016	NA	Cell	-1.60514	22.4148	-4.34358	0.00689141	0.0458569	-2.02774
Taf9	NA	21.9782	21.5357	NA	19.0482	19.5114	NA	Cell	-2.47718	20.5184	-4.97552	0.00688302	0.0458569	-1.80075
Sub1	25.3873	25.4749	26.0221	26.6437	28.4324	27.8252	NA	Cell	2.0057	26.6309	3.97621	0.00693696	0.0460749	-2.24804
Pdgfrb	23.8795	23.9761	23.9363	22.6566	21.5577	20.0779	NA	Cell	-2.49989	22.6807	-3.97168	0.00697365	0.0461868	-2.25358
Wdr61	23.8399	24.9018	24.6587	23.111	22.8264	22.2165	NA	Cell	-1.74885	23.5924	-3.97239	0.00696785	0.0461868	-2.2527
Cirbp	23.2353	22.7132	22.7591	21.9953	20.6881	20.2897	NA	Cell	-1.91153	21.9468	-3.96872	0.00699776	0.0462806	-2.2572
Atxn10	26.2814	26.412	26.5295	24.5798	24.364	25.5413	NA	Cell	-1.57925	25.618	-3.95452	0.00711467	0.0468541	-2.2746
Crtap	23.5606	23.4085	23.2882	20.8236	22.5038	21.0664	NA	Cell	-1.95447	22.4419	-3.95452	0.00711465	0.0468541	-2.2746
Hdlbp	27.7394	27.9731	27.8598	28.8948	29.2493	30.0034	NA	Cell	1.52504	28.62	3.95668	0.00709673	0.0468541	-2.27195
Whsc1	22.2873	21.7434	22.0895	20.7232	19.6957	20.8665	NA	Cell	-1.61164	21.2343	-3.95161	0.00713889	0.0469473	-2.27817
Gabpa	22.6158	22.803	22.7289	NA	19.7277	21.1741	NA	Cell	-2.27462	21.8099	-4.30289	0.00716871	0.0470769	-2.0692
Srsf2	26.408	25.7833	25.9982	27.627	27.627	27.0948	NA	Cell	1.38646	26.7564	3.94329	0.00720869	0.0472728	-2.28839
Crk	24.1952	24.9097	24.8045	20.8962	20.9873	23.5548	NA	Cell	-2.82372	23.2246	-3.93982	0.00723804	0.0473985	-2.29266
Tram1	23.3319	21.4431	21.5779	25.4748	23.6617	24.4797	NA	Cell	2.42112	23.3282	3.93069	0.00731584	0.0477735	-2.30389
Gga3	19.7935	22.4756	22.3783	NA	25.037	27.2582	NA	Cell	4.42993	23.3885	4.27419	0.00737206	0.0479659	-2.09862
Nemf	NA	22.0351	21.9773	NA	24.1777	24.1878	NA	Cell	2.17658	23.0945	4.88012	0.0073865	0.0479659	-1.87364
Stx8	22.4746	22.2957	22.3523	18.556	21.2982	19.1086	NA	Cell	-2.71992	21.0142	-3.92258	0.0073857	0.0479659	-2.31387
Psmb6	25.8755	26.1322	26.2689	27.5283	27.2816	27.2431	NA	Cell	1.25877	26.7216	3.92054	0.00740341	0.0480088	-2.31639
Imp3	22.7799	23.5194	23.4837	20.6907	21.0099	17.5474	NA	Cell	-3.51167	21.5052	-3.90782	0.00751482	0.0486634	-2.33207
Ptgr1	NA	20.5112	20.0886	NA	23.2833	22.4229	NA	Cell	2.55318	21.5765	4.84977	0.0075559	0.0488615	-1.89711
Mif	25.8076	26.3924	25.7286	28.2655	27.2816	27.2995	NA	Cell	1.63933	26.7959	3.89924	0.00759097	0.0490202	-2.34266
Rdx	25.8568	26.0689	26.2398	24.4045	23.9132	25.1479	NA	Cell	-1.56665	25.2719	-3.89603	0.00761978	0.0491381	-2.34664
Atp6v1f	NA	23.3923	23.2252	NA	19.8336	21.0355	NA	Cell	-2.87417	21.8716	-4.82492	0.0076981	0.0494377	-1.91643
Rab27b	NA	24.9552	24.7237	NA	22.7882	22.4209	NA	Cell	-2.23489	23.722	-4.82803	0.00768013	0.0494377	-1.914
Sec24b	23.778	24.229	24.2046	21.936	23.168	22.4101	NA	Cell	-1.56582	23.2876	-3.88815	0.0076908	0.0494377	-2.35638
Med8	19.8802	20.726	20.8695	NA	NA	17.4479	NA	Cell	-3.11653	19.7309	-4.82299	0.0077093	0.0494414	-1.87447
Reck	NA	22.1264	21.9101	NA	19.7219	18.3173	NA	Cell	-2.99868	20.5189	-4.79877	0.00785128	0.0502828	-1.93686
Dctn2	25.9147	26.5836	26.6016	23.9478	24.9571	25.2405	NA	Cell	-1.65154	25.5409	-3.8624	0.00792808	0.0507006	-2.3883
Mphosph8	NA	19.0795	19.5278	NA	21.5831	22.9501	NA	Cell	2.96296	20.7851	4.78418	0.00793831	0.0507006	-1.9483
Adss	24.6757	23.593	23.8083	22.9594	21.7163	20.8269	NA	Cell	-2.19148	22.9299	-3.85908	0.00795925	0.0507647	-2.39242
Acsl3	22.576	23.6259	23.5009	21.2942	22.1376	20.8179	NA	Cell	-1.81768	22.3254	-3.84796	0.00806472	0.0508799	-2.40624
Fam98a	22.6845	23.3459	23.3466	NA	25.1937	24.7449	NA	Cell	1.80127	23.8631	4.19231	0.00798958	0.0508799	-2.18329
Krt1	26.7963	28.1828	27.9237	28.8406	29.66	29.6077	NA	Cell	1.73517	28.5019	3.85233	0.00802306	0.0508799	-2.4008
Myh10	29.6171	29.7402	29.8899	28.0175	28.2743	28.8813	NA	Cell	-1.35803	29.07	-3.85127	0.00803319	0.0508799	-2.40213
Pld3	NA	23.4992	23.5311	NA	21.459	20.6353	NA	Cell	-2.468	22.2811	-4.76638	0.00804608	0.0508799	-1.96231
Scaf8	23.1507	19.7854	20.3786	18.6274	17.0404	17.9718	NA	Cell	-3.22507	19.4924	-3.85117	0.00803416	0.0508799	-2.40225
Stub1	23.747	25.4195	25.4417	22.4401	23.3552	22.7339	NA	Cell	-2.02632	23.8562	-3.84848	0.00805975	0.0508799	-2.40559
Toe1	NA	NA	20.726	NA	24.6959	24.4334	NA	Cell	3.81339	23.2851	5.98832	0.00803648	0.0508799	-1.74222
Fam213a	25.072	25.7771	26.0625	22.2512	24.2786	23.925	NA	Cell	-2.15225	24.5611	-3.83549	0.00818483	0.0515677	-2.42176
Blmh	25.3982	25.4366	25.2404	27.0759	30.3568	32.4661	NA	Cell	4.60789	27.6623	3.83392	0.0082001	0.0515941	-2.42372
Cpsf4	NA	22.104	22.0443	NA	17.3437	19.3663	NA	Cell	-3.71916	20.2146	-4.73795	0.00822191	0.0516615	-1.98478
Me1	19.1572	19.9436	19.2791	22.2496	NA	NA	NA	Cell	2.84781	20.1574	4.73531	0.00823846	0.0516958	-1.94023
Pdpk1	21.397	22.4575	22.2495	NA	NA	18.97	NA	Cell	-3.10593	21.2685	-4.71858	0.00834438	0.0522757	-1.95291
Sars2	21.2927	22.8791	22.7856	18.383	20.3261	15.7718	NA	Cell	-4.15884	20.2397	-3.81833	0.00835333	0.0522757	-2.44316
Parp2	19.0075	21.3575	21.6069	NA	17.7242	16.8749	NA	Cell	-3.51622	19.3142	-4.13606	0.00844835	0.0527993	-2.24212
Slc25a24	24.0543	24.7163	24.6155	23.3569	21.8769	22.6921	NA	Cell	-1.82005	23.552	-3.80363	0.00850073	0.0529845	-2.46153
Magt1	25.3674	24.9742	25.1196	23.0617	23.2104	24.3078	NA	Cell	-1.6271	24.3402	-3.80246	0.00851266	0.0529879	-2.463
Mbip	NA	20.3043	20.4755	NA	14.0703	17.0306	NA	Cell	-4.83949	17.9701	-4.68789	0.00854292	0.0530326	-2.02466
Med22	NA	19.9133	19.9753	NA	21.9168	22.5811	NA	Cell	2.3046	21.0966	4.6862	0.00855401	0.0530326	-2.02601
Serbp1	26.7183	26.3458	27.023	25.3265	25.0748	25.7118	NA	Cell	-1.32466	26.0334	-3.8003	0.00853454	0.0530326	-2.4657
Actl6a	26.1812	26.2009	26.1125	24.8841	24.6592	25.2425	NA	Cell	-1.23629	25.5467	-3.7895	0.00864514	0.053316	-2.47922
Atp5i	26.9099	26.7757	25.2884	24.9612	23.7717	24.0918	NA	Cell	-2.04977	25.2998	-3.78969	0.00864318	0.053316	-2.47898
Cct4	28.5569	28.2549	28.2006	27.0648	27.316	27.0126	NA	Cell	-1.20628	27.7343	-3.78947	0.00864553	0.053316	-2.47926
Rpl14	27.8542	28.7798	28.8261	27.3014	26.6261	26.2103	NA	Cell	-1.77414	27.5996	-3.7923	0.00861633	0.053316	-2.47571
Krt10	26.9501	26.4229	27.2355	28.9738	27.717	28.8775	NA	Cell	1.6533	27.6961	3.78529	0.00868876	0.053441	-2.4845
Taf15	NA	21.5477	21.9691	NA	17.9093	NA	NA	Cell	-3.80862	20.4754	-5.83284	0.00868423	0.053441	-1.81143
Ahsa1	26.0634	25.6227	25.3804	23.9383	24.3796	24.5525	NA	Cell	-1.39867	24.9895	-3.7788	0.00875639	0.0534863	-2.49264
Arpc5	24.6549	24.2286	24.1473	23.5529	22.3838	22.2665	NA	Cell	-1.60916	23.539	-3.77952	0.00874879	0.0534863	-2.49173
Eno3	NA	20.4079	20.0169	NA	13.9	16.782	NA	Cell	-4.87141	17.7767	-4.65456	0.00876504	0.0534863	-2.05142
Mex3a	24.1243	23.0531	23.0018	25.3002	25.5041	24.5037	NA	Cell	1.7096	24.2479	3.77929	0.00875121	0.0534863	-2.49202
Sf3b5	24.7556	25.7037	25.6799	21.7278	23.0266	24.2679	NA	Cell	-2.37229	24.1936	-3.7784	0.00876057	0.0534863	-2.49314
Znf24	21.577	22.4497	22.708	NA	20.5607	19.4394	NA	Cell	-2.309	21.347	-4.10072	0.00875198	0.0534863	-2.27934
Banf1	26.2982	25.7605	25.8062	24.8582	22.0991	23.5207	NA	Cell	-2.46226	24.7238	-3.77421	0.00880458	0.0536573	-2.4984
Snx6	25.5707	24.3049	24.5504	23.303	22.8021	23.4537	NA	Cell	-1.62238	23.9975	-3.77297	0.00881763	0.0536665	-2.49996
Naca	26.5352	26.4209	26.5619	23.1691	25.3251	24.6671	NA	Cell	-2.11892	25.4466	-3.77165	0.0088315	0.0536808	-2.50161
Aifm1	25.7721	26.3723	26.3241	24.3938	24.3855	25.2795	NA	Cell	-1.46988	25.4212	-3.76531	0.00889881	0.0538421	-2.50958
Cnp	23.0936	22.3612	22.3631	24.7579	23.501	24.4139	NA	Cell	1.6183	23.4151	3.76494	0.00890277	0.0538421	-2.51005
Gps1	24.0861	24.5757	24.4964	21.3091	22.8044	23.2103	NA	Cell	-1.94479	23.4137	-3.76512	0.00890086	0.0538421	-2.50982
Stab1	22.4779	23.3788	23.6807	19.941	NA	21.5086	NA	Cell	-2.43517	22.1974	-4.08352	0.00890429	0.0538421	-2.29754
Hspa12b	22.4787	23.4056	23.1364	19.7859	21.6654	21.4758	NA	Cell	-2.03118	21.9913	-3.76299	0.00892349	0.0538882	-2.51249
Entpd2	16.9191	22.9108	22.5678	23.9687	30.2728	32.2326	NA	Cell	8.02547	24.812	3.75923	0.00896387	0.0540619	-2.51723
Rps14	27.9606	27.9918	27.8394	27.1238	25.8247	25.4299	NA	Cell	-1.80445	27.0284	-3.75767	0.00898055	0.0540924	-2.51918
Fbxo11	NA	16.3878	15.614	NA	20.1737	NA	NA	Cell	4.0985	17.3918	5.75494	0.00903426	0.0543456	-1.84708
Ftsjd2	20.8347	21.0989	21.312	19.5455	NA	19.4678	NA	Cell	-1.57353	20.4518	-4.06524	0.00906949	0.0544872	-2.31693
Bcap29	22.4025	22.8677	22.5929	21.7345	20.0537	20.3881	NA	Cell	-1.89561	21.6732	-3.74492	0.00911901	0.0545034	-2.53524
Hspa13	23.3039	24.4197	24.4165	22.6188	21.4812	20.1112	NA	Cell	-2.64297	22.7252	-3.74531	0.00911471	0.0545034	-2.53474
Hspa8	31.5887	31.6371	31.5627	30.7411	29.8163	30.1843	NA	Cell	-1.34897	30.9217	-3.74598	0.00910741	0.0545034	-2.5339
Larp1	24.9051	24.9268	25.2231	23.694	24.0775	23.4742	NA	Cell	-1.26978	24.3835	-3.74684	0.00909796	0.0545034	-2.53281
Cd44	NA	21.3174	21.2634	NA	24.2271	23.2812	NA	Cell	2.46374	22.5223	4.59816	0.009157	0.0546602	-2.09711
Rnf114	NA	21.4402	21.1938	NA	17.522	13.9107	NA	Cell	-5.60064	18.5167	-4.59517	0.00917835	0.0547176	-2.09954
Sqle	NA	22.0251	21.7155	NA	17.4151	19.2923	NA	Cell	-3.51663	20.112	-4.5934	0.00919103	0.0547231	-2.10098
Zfml	22.9822	23.4279	23.7065	21.8138	22.1532	20.6342	NA	Cell	-1.83848	22.453	-3.73596	0.00921756	0.0548109	-2.54652
Pdia5	23.9592	23.9376	23.9536	22.5013	20.8512	NA	NA	Cell	-2.27354	23.0406	-4.04404	0.00926552	0.0550259	-2.33949
Hmbox1	NA	21.79	21.6105	NA	24.0256	23.6253	NA	Cell	2.12517	22.7628	4.58128	0.00927832	0.0550317	-2.11087
Nop10	NA	22.1393	21.1962	NA	24.6777	23.8714	NA	Cell	2.6068	22.9711	4.57703	0.00930919	0.0551445	-2.11434
Cdan1	NA	21.551	22.2808	NA	26.1596	24.5373	NA	Cell	3.43252	23.6322	4.57233	0.00934346	0.0552772	-2.11819
Cdc73	24.0294	24.4606	24.4145	19.6991	21.5701	23.065	NA	Cell	-2.85677	22.8731	-3.71158	0.00949206	0.0554917	-2.57732
Cln3	NA	19.697	19.75	NA	16.0746	17.5377	NA	Cell	-2.91732	18.2648	-4.54647	0.00953483	0.0554917	-2.13941
Dnmbp	NA	17.643	17.8892	NA	15.7359	15.6552	NA	Cell	-2.07054	16.7308	-4.56089	0.00942758	0.0554917	-2.12757
Espl1	NA	14.7801	14.3794	NA	NA	10.873	NA	Cell	-3.66825	13.3442	-5.63935	0.009588	0.0554917	-1.90121
Exosc7	23.0902	23.0591	22.6423	21.7157	20.237	18.4004	NA	Cell	-2.81283	21.5241	-3.70936	0.00951754	0.0554917	-2.58014
Gale	20.9079	21.2416	21.108	21.9489	24.3354	24.6645	NA	Cell	2.56378	22.3677	3.70695	0.0095452	0.0554917	-2.58318
Hsph1	25.2927	26.0424	25.9333	24.4254	24.6752	23.9593	NA	Cell	-1.40284	25.0547	-3.70273	0.00959399	0.0554917	-2.58853
Huwe1	25.0476	25.0882	25.1663	23.1152	23.688	24.2462	NA	Cell	-1.41758	24.3919	-3.71273	0.0094789	0.0554917	-2.57587
Macf1	21.5618	24.8214	25.0229	NA	28.0623	28.53	NA	Cell	4.27897	25.5997	4.02939	0.0094039	0.0554917	-2.35513
Myof	23.7948	24.6907	24.8927	25.4125	27.2331	26.5366	NA	Cell	1.93468	25.4267	3.70292	0.00959168	0.0554917	-2.58828
Prpsap2	23.15	23.8855	23.8668	21.7262	22.0994	22.7016	NA	Cell	-1.45837	22.9049	-3.71489	0.00945433	0.0554917	-2.57314
Rcn2	25.1853	25.2771	25.5806	24.0937	23.8694	24.4244	NA	Cell	-1.21851	24.7384	-3.70649	0.00955051	0.0554917	-2.58377
Slc7a5	24.2599	25.5516	25.4498	22.2876	20.3321	23.5208	NA	Cell	-3.0403	23.567	-3.71792	0.00941979	0.0554917	-2.5693
Snrnp40	24.973	26.1103	25.8474	22.3495	24.3011	24.0439	NA	Cell	-2.07872	24.6042	-3.70873	0.00952472	0.0554917	-2.58093
UncharacterizedproteinC1orf198homologOS=MusmusculusPE=1SV=1	NA	20.1661	20.3963	NA	22.2344	22.4569	NA	Cell	2.06448	21.3134	4.53856	0.00959425	0.0554917	-2.14592
UPF0585proteinC16orf13homologOS=MusmusculusPE=1SV=1	NA	22.0834	21.8758	NA	NA	18.3882	NA	Cell	-3.57149	20.7825	-5.64303	0.00956971	0.0554917	-1.89947
Wdr18	24.0016	24.7245	24.9541	20.0214	22.7163	22.8007	NA	Cell	-2.71395	23.2031	-3.71229	0.00948392	0.0554917	-2.57642
Mcm7	27.0894	27.4088	27.4152	25.5504	26.5222	25.422	NA	Cell	-1.47293	26.568	-3.70122	0.00961141	0.055522	-2.59044
Dnmt3a	26.3001	27.0634	26.9685	27.6929	28.2983	28.5713	NA	Cell	1.41021	27.4824	3.69548	0.00967825	0.0558388	-2.59771
Clpp	25.2173	25.5905	25.6181	24.5489	23.991	23.463	NA	Cell	-1.47434	24.7382	-3.68946	0.00974892	0.0559002	-2.60534
Fkbp3	27.1645	27.5416	27.4303	26.3769	24.9589	25.8647	NA	Cell	-1.64528	26.5562	-3.68986	0.00974421	0.0559002	-2.60484
Mrpl27	NA	22.1895	22.4272	NA	13.8943	18.0995	NA	Cell	-6.31147	19.1526	-4.52093	0.00972838	0.0559002	-2.16047
Ppp2r3a	NA	18.7661	18.6785	NA	21.5434	20.6539	NA	Cell	2.37634	19.9105	4.52236	0.00971742	0.0559002	-2.15929
Ssb	27.3041	27.3149	27.3193	25.5614	26.1628	26.3649	NA	Cell	-1.28305	26.6712	-3.69008	0.00974161	0.0559002	-2.60456
Rsf1	26.4719	26.3099	26.6862	21.6445	24.1075	24.9611	NA	Cell	-2.9183	25.0302	-3.68515	0.00979987	0.0561233	-2.61081
Tufm	27.4696	27.5779	27.7427	26.4246	26.5436	26.4431	NA	Cell	-1.12632	27.0336	-3.68253	0.00983099	0.0562323	-2.61414
Psmg2	21.25	21.5502	21.0891	17.084	18.6355	20.1335	NA	Cell	-2.67874	19.9571	-3.67983	0.00986318	0.0563472	-2.61757
Chmp1a	NA	21.1944	20.7593	NA	23.233	24.5855	NA	Cell	2.93237	22.4431	4.49837	0.00990341	0.0565077	-2.17917
Dcaf8	21.7415	22.3102	22.6258	23.1672	25.4373	24.4607	NA	Cell	2.12923	23.2904	3.66978	0.00998396	0.0568976	-2.63034
Rnmt	22.7688	23.5193	23.714	24.9197	25.954	24.484	NA	Cell	1.78519	24.2266	3.66513	0.0100404	0.0571491	-2.63625
Mest	26.8104	25.9612	26.2196	25.3075	21.2777	21.6674	NA	Cell	-3.57955	24.5407	-3.66286	0.010068	0.0572363	-2.63914
Gc	24.4415	23.6813	23.4048	26.6382	25.2849	25.0365	NA	Cell	1.81062	24.7479	3.66089	0.0100922	0.0573038	-2.64165
Blvra	22.3786	22.9473	22.7909	20.9885	21.1655	18.7979	NA	Cell	-2.38831	21.5114	-3.65939	0.0101104	0.0573377	-2.64355
Clic1	25.369	25.3305	24.9523	23.4719	23.2186	24.3726	NA	Cell	-1.52955	24.4525	-3.6547	0.0101682	0.057595	-2.64953
Eif2d	21.6151	20.9785	21.0016	24.267	22.3467	22.7295	NA	Cell	1.91596	22.1564	3.65098	0.0102143	0.0577639	-2.65427
Mgrn1	NA	20.9817	21.3894	NA	23.6846	23.1586	NA	Cell	2.23606	22.3036	4.45839	0.0102228	0.0577639	-2.21249
Atp6v1c1	22.8401	22.7122	22.8749	21.7686	20.7362	21.7087	NA	Cell	-1.40455	22.1068	-3.64642	0.010271	0.0579657	-2.66008
Pdlim5	20.0577	20.9736	20.8309	18.8495	18.8406	NA	NA	Cell	-1.75549	19.9105	-3.93997	0.0103011	0.0580651	-2.45134
Hnrnpul1	24.2079	24.4828	24.6942	28.7793	25.8506	26.7135	NA	Cell	2.65288	25.788	3.64258	0.0103191	0.0580664	-2.66498
Ptprf	24.0396	23.709	23.4835	25.9024	27.7199	24.9655	NA	Cell	2.45194	24.97	3.64102	0.0103387	0.0580664	-2.66697
Ranbp1	26.5539	26.5899	26.4166	25.1541	24.8075	25.6801	NA	Cell	-1.30626	25.867	-3.64117	0.0103368	0.0580664	-2.66678
Fdx1	22.2493	21.8831	22.435	NA	19.6627	NA	NA	Cell	-2.46761	21.5575	-4.43824	0.0103885	0.0582057	-2.17215
Snx18	22.6518	22.1798	22.6463	21.4971	20.3763	21.2909	NA	Cell	-1.43786	21.7737	-3.63788	0.0103782	0.0582057	-2.67097
Polr2c	24.1343	24.6171	24.7375	22.7125	21.6798	23.5283	NA	Cell	-1.85609	23.5682	-3.63159	0.010458	0.0584545	-2.67901
Tmem43	24.7695	25.1201	25.4177	20.4443	22.391	23.913	NA	Cell	-2.85297	23.6759	-3.62857	0.0104965	0.0585992	-2.68286
Fkbp8	24.3573	24.6228	24.6098	23.5581	23.075	23.4082	NA	Cell	-1.18288	23.9385	-3.62394	0.010556	0.0588251	-2.68879
Polr1c	22.9906	23.2184	23.0762	22.1349	18.7751	19.0283	NA	Cell	-3.11559	21.5372	-3.62199	0.0105811	0.0588251	-2.69128
Rab4a	NA	21.1264	21.612	NA	23.3183	24.3669	NA	Cell	2.47343	22.6059	4.41749	0.0105625	0.0588251	-2.24684
Spint1	NA	21.9851	21.9125	NA	20.1005	19.3521	NA	Cell	-2.22251	20.8376	-4.41454	0.0105875	0.0588251	-2.24933
Twf1	25.2898	24.4849	24.5419	23.3074	23.6564	23.3515	NA	Cell	-1.33378	24.1053	-3.61093	0.0107247	0.0595164	-2.70542
Fech	22.2925	23.6662	23.7288	21.1497	21.8716	19.9905	NA	Cell	-2.22522	22.1165	-3.60131	0.0108515	0.0595718	-2.71775
Hexa	21.7331	22.5577	22.413	21.2694	19.0375	19.2331	NA	Cell	-2.38791	21.0406	-3.60047	0.0108626	0.0595718	-2.71882
Hist2h2ab	26.1739	27.1193	27.265	25.1105	20.9609	23.6049	NA	Cell	-3.6273	25.0391	-3.60081	0.0108581	0.0595718	-2.71839
Pak4	21.9059	21.8011	21.9051	23.0215	27.5642	26.4083	NA	Cell	3.79393	23.7677	3.60223	0.0108394	0.0595718	-2.71658
Pde6d	21.2261	22.1829	22.2703	19.8151	20.3874	17.8163	NA	Cell	-2.55349	20.6163	-3.60476	0.0108059	0.0595718	-2.71333
Rpl23	28.0542	28.0097	28.0162	26.7567	27.0335	25.6839	NA	Cell	-1.53531	27.259	-3.6034	0.0108239	0.0595718	-2.71508
Rpl23a-ps3	28.4488	28.8463	28.9782	27.7674	27.3196	27.5113	NA	Cell	-1.22499	28.1452	-3.60147	0.0108494	0.0595718	-2.71754
Serpinb6	NA	24.4283	24.1814	NA	27.2732	26.213	NA	Cell	2.43832	25.524	4.39411	0.0107628	0.0595718	-2.26661
Ttk	NA	18.1334	18.0285	NA	14.689	NA	NA	Cell	-3.40209	16.9503	-5.4172	0.0107815	0.0595718	-2.00957
Umps	25.5962	26.0005	26.1629	25.0888	23.5309	23.5991	NA	Cell	-1.84696	24.9964	-3.60398	0.0108162	0.0595718	-2.71433
Arid1b	22.3673	21.6009	21.5684	19.4984	20.214	20.7766	NA	Cell	-1.68255	21.0043	-3.59118	0.0109868	0.0599667	-2.73075
Fam173a	NA	21.2481	21.2259	NA	NA	17.8653	NA	Cell	-3.36954	20.1131	-5.37915	0.0110048	0.0599667	-2.02872
Prmt5	23.4295	24.4816	24.4265	21.3869	22.4989	23.0513	NA	Cell	-1.80014	23.2124	-3.59279	0.0109652	0.0599667	-2.72868
Sec23ip	23.4206	25.0392	24.9299	22.0746	23.0014	22.8997	NA	Cell	-1.80466	23.5609	-3.58878	0.0110192	0.0599667	-2.73383
Sec62	22.4075	24.5839	25.3866	25.9625	27.3657	27.03	NA	Cell	2.66005	25.456	3.58986	0.0110046	0.0599667	-2.73244
Spcs3	23.2504	23.9042	23.9713	25.6537	24.6337	26.5103	NA	Cell	1.89063	24.6539	3.58836	0.0110248	0.0599667	-2.73436
Ptprd	NA	20.8858	20.477	NA	18.3268	18.7589	NA	Cell	-2.13855	19.6121	-4.35551	0.0111035	0.0603241	-2.29943
Gpx7	22.7813	23.0738	23.1031	20.9753	19.7252	16.1053	NA	Cell	-4.05082	20.9607	-3.57953	0.0111447	0.0604773	-2.7457
Actb	NA	32.2892	32.2847	NA	29.7999	30.4748	NA	Cell	-2.14963	31.2121	-4.3463	0.0111867	0.0606347	-2.3073
Atad2	22.1632	22.7263	22.6357	21.1383	20.5173	21.5789	NA	Cell	-1.43023	21.7933	-3.57096	0.0112624	0.0607253	-2.75672
B4galt1	NA	21.6699	21.4325	NA	NA	24.9159	NA	Cell	3.38751	22.6728	5.33545	0.0112686	0.0607253	-2.05092
Slc1a7	NA	21.4164	21.2436	NA	23.5439	23.1413	NA	Cell	2.01263	22.3363	4.33837	0.0112589	0.0607253	-2.31409
Snrpf	25.414	25.1169	25.4901	24.6068	22.8641	23.3204	NA	Cell	-1.74326	24.4687	-3.57394	0.0112214	0.0607253	-2.7529
Ung	NA	17.0477	19.2366	NA	21.2447	22.9628	NA	Cell	3.9616	20.123	4.33853	0.0112574	0.0607253	-2.31394
Nup160	25.0316	25.1204	25.3315	21.6144	24.1209	23.163	NA	Cell	-2.19507	24.0636	-3.56752	0.0113101	0.0608783	-2.76115
Hip1	24.5104	25.2069	25.0434	23.3043	22.6511	20.0613	NA	Cell	-2.91466	23.4629	-3.56558	0.011337	0.0609529	-2.76365
Lss	23.0868	23.5184	23.1553	25.5139	24.7674	24.1257	NA	Cell	1.54885	24.0279	3.56303	0.0113726	0.0610739	-2.76693
Nhp2	21.3981	21.6904	20.1064	NA	23.9737	22.7746	NA	Cell	2.34119	21.9886	3.83835	0.0114419	0.0613752	-2.56233
Acsl4	NA	21.9635	21.9359	NA	20.0333	18.8538	NA	Cell	-2.50614	20.6966	-4.31278	0.0114959	0.0615935	-2.33605
Rps2	28.8544	29.0281	29.0793	27.7869	27.5184	28.1426	NA	Cell	-1.17132	28.4016	-3.54856	0.0115767	0.0618841	-2.78558
Rps4y2	NA	22.1553	21.4871	NA	25.5403	NA	NA	Cell	3.65495	23.0609	5.2866	0.0115734	0.0618841	-2.07603
Ccdc115	NA	21.8274	22.3576	NA	18.5122	NA	NA	Cell	-3.52932	20.8991	-5.28334	0.0115941	0.0619061	-2.07771
C3	26.3013	25.1224	25.1346	27.6274	26.7613	26.828	NA	Cell	1.5528	26.2958	3.54269	0.0116606	0.0621188	-2.79315
Uhrf1	23.9884	24.438	24.8589	22.995	23.2021	23.3438	NA	Cell	-1.24811	23.8044	-3.54313	0.0116543	0.0621188	-2.79258
Ergic1	25.0461	26.075	25.9915	24.6222	23.8653	23.8765	NA	Cell	-1.58288	24.9128	-3.5384	0.0117225	0.062164	-2.79869
Ints2	22.9393	21.7006	21.9545	23.4724	24.0995	23.7506	NA	Cell	1.57603	22.9862	3.53911	0.0117121	0.062164	-2.79777
Nes	24.9198	24.8089	24.8342	28.0938	27.9929	25.5996	NA	Cell	2.37447	26.0415	3.53941	0.0117078	0.062164	-2.79738
Npr3	NA	21.8421	22.4535	NA	NA	18.6174	NA	Cell	-3.5891	20.971	-5.26889	0.0116865	0.062164	-2.0852
Vezt	NA	20.5297	20.6247	NA	15.1589	17.8281	NA	Cell	-4.08367	18.5354	-4.28511	0.0117588	0.0622855	-2.35993
Nudc	25.9768	26.1344	26.2175	25.0687	24.2732	25.1155	NA	Cell	-1.29043	25.4644	-3.53431	0.0117817	0.0623357	-2.80397
Bola1	20.8343	22.9297	22.77	NA	15.0656	19.4047	NA	Cell	-5.07189	20.2009	-3.80459	0.0118524	0.0624012	-2.59959
Copg2	24.4241	25.1944	25.0227	23.8131	23.4653	23.5442	NA	Cell	-1.2729	24.244	-3.52667	0.0118932	0.0624012	-2.81385
Mtch1	24.2681	24.2644	24.266	23.5812	21.8411	22.077	NA	Cell	-1.7664	23.383	-3.52513	0.0119158	0.0624012	-2.81583
Ndufs2	26.6767	26.3091	26.1732	25.5948	24.9994	24.8689	NA	Cell	-1.23194	25.7704	-3.52849	0.0118665	0.0624012	-2.81149
Psmb4	26.0932	27.2994	27.1698	27.8471	29.4129	28.5739	NA	Cell	1.75716	27.7327	3.52699	0.0118884	0.0624012	-2.81343
Qrich1	21.7204	22.3664	22.5886	NA	23.6916	25.0763	NA	Cell	2.11037	23.0887	3.80512	0.0118458	0.0624012	-2.599
Rbfox2	23.1823	23.995	23.7461	21.3187	22.6147	22.3974	NA	Cell	-1.53085	22.8757	-3.52669	0.0118929	0.0624012	-2.81382
Rcor2	NA	22.3877	22.5076	NA	24.7938	24.234	NA	Cell	2.06622	23.4808	4.26949	0.0119105	0.0624012	-2.37346
Rpa2	23.4895	24.3495	24.3808	22.2786	23.166	21.7515	NA	Cell	-1.67454	23.236	-3.5243	0.0119281	0.0624012	-2.81691
Usp19	21.8999	22.1524	22.3167	20.9114	19.3473	20.8798	NA	Cell	-1.74351	21.2512	-3.52697	0.0118887	0.0624012	-2.81345
Pdx1	NA	21.7124	21.7341	NA	18.3282	19.7377	NA	Cell	-2.69026	20.3781	-4.26552	0.0119493	0.0624423	-2.37691
Cox5a	26.9194	26.7226	26.7245	26.0001	25.5097	25.3635	NA	Cell	-1.16439	26.2066	-3.52137	0.0119712	0.0624864	-2.8207
Hoxa5	18.7288	20.1779	20.6202	17.7003	18.4254	17.0555	NA	Cell	-2.11525	18.7847	-3.51835	0.012016	0.0626017	-2.82461
Reep6	21.9928	22.4343	22.3277	NA	NA	19.9509	NA	Cell	-2.31531	21.6764	-4.25833	0.0120202	0.0626017	-2.31969
Clmn	19.3887	20.5391	20.5453	23.0148	NA	NA	NA	Cell	3.00481	20.872	4.24845	0.0121184	0.0630428	-2.32796
Tmed9	25.5681	26.1701	26.1894	25.0807	23.9241	24.3753	NA	Cell	-1.51586	25.218	-3.50683	0.0121883	0.0632651	-2.83953
Cand2	24.5079	24.3523	24.4173	25.4279	26.9242	25.7215	NA	Cell	1.59872	25.2252	3.50056	0.0122832	0.0636011	-2.84766
Grb10	23.9232	24.4179	24.2377	21.1428	22.5406	23.2271	NA	Cell	-1.88939	23.2482	-3.49985	0.012294	0.0636011	-2.84858
Ppid	25.8063	26.7254	26.6955	25.0714	25.2668	24.8894	NA	Cell	-1.33322	25.7425	-3.50067	0.0122816	0.0636011	-2.84752
Epb41l5	NA	18.8592	19.5466	NA	NA	22.8655	NA	Cell	3.59657	20.4238	5.17526	0.0123086	0.063606	-2.13437
Gcc1	17.0468	19.2104	19.3373	16.5319	16.2983	15.3772	NA	Cell	-2.46235	17.3003	-3.49616	0.0123503	0.0636801	-2.85337
Nrp2	NA	21.0919	23.0537	NA	25.2318	25.3466	NA	Cell	3.21643	23.681	4.2259	0.0123461	0.0636801	-2.41144
Gap43	24.5315	25.0129	24.9531	20.5123	22.8318	23.534	NA	Cell	-2.53979	23.5626	-3.49282	0.0124015	0.0637324	-2.8577
Mga	NA	18.2506	18.1765	NA	NA	21.4461	NA	Cell	3.23967	19.2911	5.16552	0.0123758	0.0637324	-2.13954
Vgf	17.2412	16.4424	16.2465	17.6362	19.865	19.1544	NA	Cell	2.24183	17.7643	3.49333	0.0123937	0.0637324	-2.85704
Ccdc101	21.0943	22.4029	22.1911	20.1124	17.9133	20.1481	NA	Cell	-2.50489	20.6437	-3.49021	0.0124416	0.063868	-2.86108
Celf1	23.4462	24.8512	24.9001	22.2149	23.313	22.353	NA	Cell	-1.77223	23.5131	-3.48608	0.0125055	0.0641253	-2.86645
Gm10020	26.943	26.3506	26.7513	25.923	25.1432	24.805	NA	Cell	-1.39122	25.986	-3.48459	0.0125286	0.0641731	-2.86838
1810009J06Rik	23.3382	20.5146	21.3574	23.5908	25.1481	25.7797	NA	Cell	3.10279	23.2881	3.47593	0.012664	0.064653	-2.87964
Rab1b	27.3162	27.96	27.9439	28.6271	29.2405	29.0236	NA	Cell	1.22371	28.3519	3.47632	0.0126579	0.064653	-2.87913
Wrnip1	NA	22.3094	22.4547	NA	20.6155	19.9064	NA	Cell	-2.12108	21.3215	-4.19714	0.012644	0.064653	-2.43668
Wasf2	NA	22.6831	22.8645	NA	21.0105	20.4791	NA	Cell	-2.02904	21.7593	-4.19373	0.0126799	0.0646632	-2.43968
Pard3	22.0741	22.7004	22.6304	19.3328	21.5708	20.6556	NA	Cell	-1.94857	21.494	-3.47129	0.0127372	0.0648134	-2.88567
Tpgs1	19.9234	19.5264	19.3554	NA	21.5734	20.8242	NA	Cell	1.62791	20.2405	3.73697	0.012726	0.0648134	-2.6748
Rab21	21.2595	21.6551	21.3568	22.1407	22.9487	23.2355	NA	Cell	1.35111	22.0994	3.46923	0.0127698	0.0648378	-2.88836
Sypl1	22.7794	21.6086	22.4291	23.4743	23.8492	23.7752	NA	Cell	1.42722	22.986	3.47004	0.012757	0.0648378	-2.88731
Lrrfip2	21.8624	21.5715	21.9794	18.3545	20.3433	NA	NA	Cell	-2.43872	20.8222	-3.73239	0.0127878	0.0648584	-2.67992
Ptprj	NA	18.7437	19.1385	NA	21.4982	20.7818	NA	Cell	2.19888	20.0406	4.17802	0.0128469	0.0649457	-2.45354
Stx1a	NA	21.9342	21.9542	NA	23.87	23.7565	NA	Cell	1.86902	22.8787	4.17945	0.0128316	0.0649457	-2.45228
Tsc1	17.8312	19.9373	20.6139	NA	16.8225	15.9675	NA	Cell	-3.22225	18.2345	-3.72888	0.0128353	0.0649457	-2.68385
Alg2	25.2342	25.2783	25.1327	22.1333	24.3629	23.3188	NA	Cell	-1.94345	24.2434	-3.46332	0.0128639	0.0649615	-2.89605
Dnajb6	21.6239	22.0576	22.2343	20.7048	19.9428	21.0551	NA	Cell	-1.40439	21.2697	-3.45627	0.0129773	0.065463	-2.90524
Gosr2	22.9196	23.6701	23.3376	21.1327	22.1904	19.2683	NA	Cell	-2.4453	22.0865	-3.45427	0.0130096	0.0655547	-2.90784
Orc4	NA	21.1878	21.2665	NA	19.4063	19.3298	NA	Cell	-1.85908	20.2976	-4.15697	0.0130747	0.0657404	-2.47216
Polb	22.8673	22.0841	22.5216	NA	19.9583	NA	NA	Cell	-2.45455	21.8578	-4.15766	0.0130672	0.0657404	-2.40467
Abca1	NA	18.0289	18.2189	NA	20.5341	19.8749	NA	Cell	2.08058	19.1642	4.15386	0.0131087	0.0658405	-2.47492
Sec23b	25.219	25.602	25.3326	24.0525	24.4132	24.397	NA	Cell	-1.097	24.836	-3.43757	0.0132832	0.0666448	-2.92963
Sf3a3	25.4249	25.9017	26.1445	22.7603	24.5307	24.6358	NA	Cell	-1.84814	24.8997	-3.43425	0.0133383	0.0668495	-2.93396
Actc1	29.5746	29.7739	29.3088	28.7874	25.6142	25.7779	NA	Cell	-2.82594	28.1395	-3.43218	0.0133728	0.0669504	-2.93667
Gtf3c5	22.8547	25.0601	25.0318	22.5629	21.6924	21.5371	NA	Cell	-2.38472	23.1232	-3.42831	0.0134376	0.0669821	-2.94173
Mtmr6	NA	17.7565	17.9396	NA	14.1589	15.8446	NA	Cell	-2.84634	16.4249	-4.12313	0.0134511	0.0669821	-2.50227
Nae1	23.1475	23.0426	23.016	22.4516	20.7612	20.82	NA	Cell	-1.72443	22.2065	-3.42902	0.0134256	0.0669821	-2.94079
Pbdc1	23.7623	24.1484	24.381	18.8985	22.8406	21.3708	NA	Cell	-3.06061	22.5669	-3.42964	0.0134153	0.0669821	-2.93999
Rbm14	25.0543	26.5599	26.6206	22.5101	24.7188	24.3701	NA	Cell	-2.21192	24.9723	-3.42884	0.0134287	0.0669821	-2.94104
Ccdc94	NA	19.5639	19.9208	NA	17.9491	17.5898	NA	Cell	-1.9729	18.7559	-4.11924	0.0134952	0.0670644	-2.50574
Rpl35a	25.4217	23.8123	24.3492	26.8374	25.9474	25.8182	NA	Cell	1.67326	25.3643	3.42481	0.0134964	0.0670644	-2.9463
Npepl1	20.5331	23.3223	22.8894	16.936	20.7894	18.8224	NA	Cell	-3.399	20.5488	-3.42249	0.0135357	0.0671879	-2.94934
Coq9	23.5136	23.7208	23.6341	22.7771	21.3189	22.2381	NA	Cell	-1.51143	22.8671	-3.42024	0.0135738	0.0673052	-2.95228
Homer1	19.912	20.2177	21.4415	NA	22.7143	22.5651	NA	Cell	2.05721	21.3701	3.67432	0.0136013	0.0673699	-2.74516
Kat6a	NA	17.2043	17.8686	NA	14.0273	NA	NA	Cell	-3.44534	16.3667	-4.9886	0.013682	0.0676975	-2.23578
Creg1	18.235	20.5236	20.3237	22.7278	22.4097	21.3207	NA	Cell	2.45862	20.9234	3.40899	0.0137661	0.0680415	-2.96701
Nosip	NA	20.5666	20.8033	NA	22.4433	23.5718	NA	Cell	2.32264	21.8463	4.09124	0.0138177	0.0680886	-2.53081
P4hb	29.8775	29.8046	29.8357	32.9827	30.6852	31.695	NA	Cell	1.94838	30.8135	3.40454	0.013843	0.0680886	-2.97284
Tmx3	23.4697	23.979	24.2459	22.0698	23.1378	22.2503	NA	Cell	-1.41224	23.1921	-3.40746	0.0137924	0.0680886	-2.96901
Tns1	21.8309	21.896	21.3399	19.4158	NA	NA	NA	Cell	-2.30038	21.1207	-4.09057	0.0138257	0.0680886	-2.46227
Uqcrc2	27.736	28.4011	28.331	26.1519	27.195	27.0643	NA	Cell	-1.35232	27.4799	-3.40421	0.0138488	0.0680886	-2.97328
Ghitm	NA	22.1873	22.6052	NA	20.3881	18.9672	NA	Cell	-2.71857	21.037	-4.08547	0.0138854	0.0681246	-2.536
Trappc12	22.6499	22.3437	22.5166	18.8803	18.1308	21.7228	NA	Cell	-2.92539	21.0407	-3.40002	0.0139217	0.0682309	-2.97877
Gstm5	23.7685	22.9004	23.2189	22.3325	20.6516	21.9166	NA	Cell	-1.66237	22.4647	-3.39829	0.0139518	0.0683066	-2.98103
Cpne3	24.0661	25.8931	25.9651	26.3222	29.2334	28.1928	NA	Cell	2.60804	26.6121	3.38765	0.0141393	0.0689577	-2.995
Ctdp1	21.1839	21.4059	21.6453	20.1855	19.4732	20.5902	NA	Cell	-1.32868	20.7473	-3.38916	0.0141124	0.0689577	-2.99301
Shprh	NA	23.0755	23.3748	NA	20.8222	21.5468	NA	Cell	-2.04061	22.2048	-4.06383	0.0141425	0.0689577	-2.55549
Wbscr22	22.0724	22.8317	22.7312	NA	20.9289	21.1541	NA	Cell	-1.54902	21.9437	-3.63774	0.014144	0.0689577	-2.78656
Ctsl1	18.9945	21.9232	21.5051	24.7454	23.5241	23.0605	NA	Cell	2.96907	22.2921	3.38103	0.0142572	0.0694368	-3.00369
Kpna4	23.2734	23.4516	23.903	20.8455	22.614	22.1101	NA	Cell	-1.68612	22.6996	-3.37895	0.0142945	0.0695273	-3.00642
Mgat1	21.8826	21.4162	22.1314	22.5796	23.3438	23.8288	NA	Cell	1.44066	22.5304	3.37833	0.0143057	0.0695273	-3.00724
Rpl11	NA	28.0092	28.0406	NA	23.7517	25.8405	NA	Cell	-3.22881	26.4105	-4.04823	0.0143314	0.0695798	-2.56959
Phldb2	NA	19.9593	20.4637	NA	17.7199	18.4977	NA	Cell	-2.10271	19.1602	-4.04643	0.0143534	0.0696138	-2.57122
Otub1	26.2741	25.967	25.9219	24.3831	24.7264	25.2863	NA	Cell	-1.25571	25.4264	-3.36784	0.0144955	0.07023	-3.02103
Kiaa1467	21.1986	20.9358	21.2366	24.4643	22.3573	22.4688	NA	Cell	1.97312	22.1102	3.36619	0.0145257	0.0703031	-3.0232
Igbp1	23.313	22.2273	22.0937	21.0814	18.8293	NA	NA	Cell	-2.63258	21.5089	-3.6109	0.0145579	0.070386	-2.81708
Sarnp	26.7625	26.0241	26.0082	25.6169	24.0102	24.3403	NA	Cell	-1.60914	25.4604	-3.36282	0.0145873	0.0704549	-3.02763
Bet1l	NA	22.1985	22.1995	NA	24.2796	23.8618	NA	Cell	1.87173	23.1349	4.02569	0.0146096	0.0704895	-2.59004
Bcap31	24.6612	25.8273	25.9233	21.2869	15.4252	22.5967	NA	Cell	-5.70099	22.6201	-3.35936	0.0146511	0.0706163	-3.03219
Wdr77	23.4423	22.2882	22.1266	25.7202	NA	NA	NA	Cell	2.94312	23.3943	4.01401	0.0147564	0.0710506	-2.52898
Ddx54	19.212	19.7216	20.7698	NA	NA	16.9678	NA	Cell	-3.10022	19.1678	-4.00769	0.0148366	0.071289	-2.53454
Pars2	NA	20.8874	20.9082	NA	19.2061	18.9613	NA	Cell	-1.81415	19.9907	-4.00836	0.014828	0.071289	-2.60582
Ppp3r1	21.1042	19.1268	19.269	22.4568	21.8475	21.1309	NA	Cell	1.9784	20.8225	3.34807	0.014861	0.071333	-3.04707
Krt17	NA	20.7645	21.567	NA	24.1093	23.1695	NA	Cell	2.47366	22.4026	4.00344	0.0148906	0.0714015	-2.61031
Brcc3	22.4322	22.6921	22.5037	21.2899	17.0362	19.558	NA	Cell	-3.24795	20.9187	-3.3439	0.0149394	0.0715614	-3.05257
Mpp7	22.7991	23.2852	22.9762	21.8303	20.6468	18.3409	NA	Cell	-2.74754	21.6464	-3.33717	0.0150667	0.0720222	-3.06144
Nfkb1	NA	24.2982	24.7438	NA	22.0949	19.7487	NA	Cell	-3.5992	22.7214	-3.98858	0.015082	0.0720222	-2.6239
Pnp	24.5523	24.5161	24.386	25.3396	25.6446	25.5697	NA	Cell	1.03319	25.0014	3.33772	0.0150563	0.0720222	-3.06072
Htatsf1	23.4778	22.9119	23.1858	25.1596	23.7933	25.0159	NA	Cell	1.46442	23.9241	3.33399	0.0151273	0.0720909	-3.06564
Tubgcp2	22.1455	24.1895	24.204	NA	26.0688	26.282	NA	Cell	2.53109	24.578	3.57581	0.0151199	0.0720909	-2.85715
Pddc1	22.6012	22.8786	23.193	NA	25.0298	24.1339	NA	Cell	1.66309	23.5673	3.56517	0.0152952	0.0727418	-2.86935
Rps4x	29.2395	28.8331	28.8134	28.1454	26.6011	25.1034	NA	Cell	-2.34534	27.7893	-3.32556	0.0152893	0.0727418	-3.07678
Gtf2f1	21.2992	21.3749	21.7075	20.4814	19.3017	20.4242	NA	Cell	-1.39141	20.7648	-3.32348	0.0153296	0.0728313	-3.07953
Cbr1	25.0507	25.4065	25.123	23.6332	24.4234	24.0835	NA	Cell	-1.14669	24.62	-3.31605	0.0154745	0.0734345	-3.08936
Homer2	NA	20.9861	21.1047	NA	24.0362	NA	NA	Cell	3.00218	22.0423	4.77686	0.0154881	0.0734345	-2.35656
Eif3f	26.8684	27.5595	27.301	24.7673	26.4035	25.9065	NA	Cell	-1.55054	26.4677	-3.31375	0.0155196	0.0735089	-3.0924
Sh2b1	NA	20.9153	20.5394	NA	NA	23.7805	NA	Cell	3.08923	21.7451	4.77015	0.0155502	0.0735789	-2.36049
Clptm1	23.8995	24.1573	24.3677	20.7247	22.8893	22.8513	NA	Cell	-1.98641	23.1483	-3.30995	0.0155944	0.0736231	-3.09743
L2hgdh	21.8124	22.2214	22.2876	19.1708	18.5948	21.4723	NA	Cell	-2.36118	20.9266	-3.30565	0.0156795	0.0736231	-3.10311
Mrpl1	23.5259	25.9134	23.7788	22.8754	19.3215	20.4576	NA	Cell	-3.52112	22.6454	-3.3065	0.0156627	0.0736231	-3.10199
Pdia6	29.001	28.7641	28.6725	30.0123	29.6166	29.9871	NA	Cell	1.05946	29.3423	3.30558	0.0156809	0.0736231	-3.10321
Rdh11	23.3381	23.873	23.8966	22.3664	22.9388	22.0257	NA	Cell	-1.25895	23.0731	-3.30532	0.015686	0.0736231	-3.10355
Sec61a2	NA	19.9451	20.5857	NA	16.9359	NA	NA	Cell	-3.26797	19.1556	-4.76163	0.0156296	0.0736231	-2.36549
Spcs3	23.1179	23.9042	23.9713	25.1912	24.6337	26.5103	NA	Cell	1.78065	24.5548	3.30944	0.0156045	0.0736231	-3.09811
Mpp6	21.5777	24.0313	23.0424	NA	18.2417	20.694	NA	Cell	-3.54134	21.5174	-3.53911	0.0157341	0.0737746	-2.89929
Prkar2a	23.2807	23.0338	23.1534	NA	21.9234	20.1458	NA	Cell	-2.10939	22.3074	-3.53538	0.0157981	0.0739998	-2.90358
Tns3	22.2882	25.3454	20.9441	19.1459	17.408	NA	NA	Cell	-4.76614	21.0263	-3.53065	0.0158797	0.0743075	-2.90903
Pdzrn3	NA	18.7678	18.1701	NA	15.3144	NA	NA	Cell	-3.21187	17.4174	-4.73123	0.0159168	0.0743317	-2.38342
Dock9	20.7229	21.5099	22.9185	19.3854	13.048	17.7414	NA	Cell	-4.99213	19.221	-3.2907	0.0159798	0.0744763	-3.12293
Rsl24d1	NA	20.9631	21.3522	NA	17.9492	19.3935	NA	Cell	-2.48631	19.9145	-3.91936	0.0160126	0.0745544	-2.68769
Vcam1	20.5795	24.8878	24.8455	19.9417	20.1588	18.2993	NA	Cell	-3.97098	21.4521	-3.287	0.0160549	0.0746769	-3.12783
Naglu	21.4153	22.7606	22.8967	23.3805	24.6766	24.0119	NA	Cell	1.66547	23.1903	3.283	0.0161367	0.0748856	-3.13314
Nynrin	21.3286	22.3197	22.2397	20.4767	21.0423	20.464	NA	Cell	-1.30163	21.3118	-3.28167	0.0161641	0.0748856	-3.13491
Sumo2	NA	25.6017	25.701	NA	19.1125	22.6889	NA	Cell	-4.75064	23.276	-3.91054	0.016136	0.0748856	-2.69588
Vps13c	20.2951	20.4289	20.7253	NA	17.003	19.2227	NA	Cell	-2.38833	19.535	-3.51524	0.0161488	0.0748856	-2.92681
Gadd45gip1	NA	22.8921	22.7548	NA	20.8913	19.0387	NA	Cell	-2.85847	21.3942	-3.90167	0.0162612	0.0752291	-2.70413
Ide	25.6226	25.945	25.5231	26.4735	26.9629	26.9107	NA	Cell	1.08547	26.2396	3.2765	0.0162706	0.0752291	-3.14177
Morf4l1	22.9612	23.4266	23.5976	21.9672	21.6681	19.3494	NA	Cell	-2.33354	22.1617	-3.27545	0.0162923	0.075255	-3.14317
Ahcy	27.7277	27.3875	27.4826	28.4525	28.6604	28.5614	NA	Cell	1.02551	28.0454	3.27276	0.0163481	0.0754378	-3.14674
Cpsf3	24.1682	24.8952	24.7412	23.5333	23.338	23.5294	NA	Cell	-1.13463	24.0342	-3.271	0.0163849	0.0755327	-3.14908
Psmc3	26.5497	27.2246	27.1539	24.6851	25.6807	26.1701	NA	Cell	-1.46409	26.244	-3.26941	0.0164181	0.0756108	-3.1512
Abi1	23.0062	23.7836	23.7618	20.3369	22.2424	22.3743	NA	Cell	-1.866	22.5842	-3.26838	0.0164396	0.0756175	-3.15256
Mxra7	22.8762	21.1993	21.9427	20.082	20.5987	20.4741	NA	Cell	-1.62112	21.1955	-3.26701	0.0164682	0.0756175	-3.15438
Sptb	17.9516	21.4188	21.3837	NA	24.2439	24.2536	NA	Cell	3.77654	21.8503	3.49811	0.0164539	0.0756175	-2.94662
Pnkp	26.5162	27.0194	26.5625	25.9469	25.3988	24.8617	NA	Cell	-1.29691	26.0509	-3.26437	0.0165237	0.0757974	-3.15789
Rbp1	24.2458	24.1202	23.9345	25.661	24.8159	25.2813	NA	Cell	1.15259	24.6764	3.26292	0.0165542	0.0758625	-3.15982
Tamm41	23.3785	20.8698	20.3694	NA	18.2955	18.1532	NA	Cell	-3.13831	20.2133	-3.48743	0.0166475	0.076215	-2.95899
Znf787	NA	20.4895	20.7044	NA	16.0358	18.42	NA	Cell	-3.36905	18.9124	-3.87313	0.0166722	0.0762534	-2.73076
Haus5	NA	22.2833	22.3785	NA	20.7273	20.3295	NA	Cell	-1.80249	21.4297	-3.87025	0.0167143	0.0763709	-2.73345
Mnf1	21.8021	22.9007	23.0427	NA	19.8847	NA	NA	Cell	-2.75843	21.9076	-3.86485	0.0167938	0.0766588	-2.66195
Dap3	23.8651	24.3079	24.2497	18.8123	21.6787	22.8843	NA	Cell	-3.01582	22.633	-3.24763	0.0168799	0.0769764	-3.18016
Arid1a	24.8269	25.6064	25.6406	22.7796	24.6182	23.7502	NA	Cell	-1.64197	24.537	-3.24522	0.0169321	0.076988	-3.18338
Hif1an	20.6211	20.4513	20.8133	21.235	23.7954	24.347	NA	Cell	2.49721	21.8772	3.24584	0.0169186	0.076988	-3.18256
Mical3	NA	17.4128	16.7855	NA	19.5675	22.069	NA	Cell	3.7191	18.9587	3.85633	0.0169199	0.076988	-2.7465
Esyt2	23.9407	23.3501	23.3525	22.8649	22.1984	21.8557	NA	Cell	-1.24148	22.927	-3.24044	0.0170356	0.077383	-3.18974
Lrp6	NA	18.7421	20.1199	NA	21.5899	23.4965	NA	Cell	3.11219	20.9871	3.84588	0.0170762	0.0774477	-2.75633
Thumpd3	NA	21.3213	21.3255	NA	NA	18.4335	NA	Cell	-2.89032	20.3601	-4.61467	0.0170831	0.0774477	-2.4534
Napa	26.0815	26.4834	26.5348	24.7732	25.7315	24.3117	NA	Cell	-1.42778	25.6527	-3.23627	0.0171266	0.0775404	-3.19531
Psma7	27.3546	27.833	27.6782	28.2849	29.7496	30.8421	NA	Cell	2.00359	28.6237	3.2358	0.0171368	0.0775404	-3.19593
Mrpl16	22.2697	23.2096	23.0111	18.9103	21.5283	21.3674	NA	Cell	-2.22815	21.7161	-3.23373	0.0171823	0.0776709	-3.1987
Ap1b1	25.7978	26.1998	26.4039	25.4135	24.5673	24.258	NA	Cell	-1.38758	25.44	-3.23063	0.0172504	0.0777312	-3.20283
Eif4e	24.4227	25.1675	25.0828	24.1477	22.7185	22.1149	NA	Cell	-1.89734	23.9424	-3.2308	0.0172467	0.0777312	-3.2026
Ercc2	21.4182	21.2522	21.1101	19.8578	19.7992	17.1265	NA	Cell	-2.33235	20.094	-3.22966	0.017272	0.0777312	-3.20413
Pacs1	21.8052	22.4695	22.5983	NA	19.74	21.1224	NA	Cell	-1.90646	21.5471	-3.4538	0.0172741	0.0777312	-2.99808
Srrm1	22.0151	21.561	21.6808	19.5252	20.6846	20.7516	NA	Cell	-1.43182	21.0364	-3.22933	0.0172792	0.0777312	-3.20456
Acin1	24.7727	24.3039	24.7457	25.6377	26.1467	25.5089	NA	Cell	1.15702	25.1859	3.22601	0.0173527	0.0778428	-3.20899
Hist3h2a	NA	32.2551	32.3899	NA	29.9815	30.769	NA	Cell	-1.94727	31.3489	-3.82758	0.0173541	0.0778428	-2.77357
Psmb3	26.2832	26.3101	26.3091	27.476	27.2921	27.1223	NA	Cell	0.996032	26.7988	3.22693	0.0173324	0.0778428	-3.20777
Lactb2	NA	22.1502	21.2705	NA	25.887	23.7554	NA	Cell	3.11079	23.2658	3.8227	0.0174291	0.0780308	-2.77818
Slc25a10	22.7566	24.2417	24.0518	16.8678	21.7853	21.1432	NA	Cell	-3.75124	21.8077	-3.22256	0.0174296	0.0780308	-3.21361
Vapb	26.1615	25.0487	25.3288	24.4268	24.0143	24.337	NA	Cell	-1.25364	24.8862	-3.22072	0.0174706	0.0781395	-3.21606
Farsa	26.6355	26.0618	26.1934	25.6284	24.8329	24.0649	NA	Cell	-1.45481	25.5695	-3.21616	0.0175727	0.0781458	-3.22214
Gcdh	22.8665	23.0091	22.6139	23.9007	25.2963	23.7796	NA	Cell	1.49569	23.5777	3.21785	0.0175349	0.0781458	-3.21989
Synpo	20.3065	20.9787	21.301	NA	22.6207	26.1805	NA	Cell	3.48524	22.2775	3.43977	0.0175433	0.0781458	-3.01445
Tnpo2	22.8012	23.2768	23.1937	NA	21.6675	21.8749	NA	Cell	-1.34716	22.5628	-3.44219	0.0174965	0.0781458	-3.01162
Zfp462	NA	19.5304	19.7782	NA	16.9516	18.0581	NA	Cell	-2.14945	18.5796	-3.81409	0.0175623	0.0781458	-2.78631
Slc39a10	NA	21.4249	21.7016	NA	23.1152	23.7113	NA	Cell	1.84995	22.4882	3.81028	0.0176216	0.0782883	-2.78992
Scai	NA	20.6114	20.748	NA	19.0994	18.2542	NA	Cell	-2.0029	19.6782	-3.80584	0.0176911	0.0784474	-2.79412
Hars	26.1219	25.7482	25.7952	26.5784	27.803	27.3012	NA	Cell	1.33917	26.558	3.20972	0.0177184	0.0784938	-3.23075
Khdrbs3	NA	21.5016	21.4344	NA	NA	24.3096	NA	Cell	2.84807	22.4152	4.54221	0.0178635	0.0790613	-2.49792
Crmp1	NA	21.9879	22.1339	NA	19.4754	20.4942	NA	Cell	-2.07605	21.0229	-3.7927	0.0178986	0.0790663	-2.80659
Lonp2	22.8712	23.6217	23.2967	22.6108	20.5003	20.476	NA	Cell	-2.06749	22.2294	-3.20242	0.0178849	0.0790663	-3.24051
Tars	24.391	25.6403	26.5067	27.2852	27.2163	27.2611	NA	Cell	1.74152	26.3834	3.19986	0.0179437	0.0791906	-3.24394
Slc25a22	20.7824	22.0078	21.9857	13.7831	16.4159	20.5242	NA	Cell	-4.68421	19.2499	-3.199	0.0179635	0.0792027	-3.24508
Pgrmc1	25.6757	25.3939	25.5617	24.23	24.0255	24.9114	NA	Cell	-1.15476	24.9664	-3.19515	0.0180526	0.0795201	-3.25024
Azi1	21.249	22.3927	22.668	16.1808	20.3879	19.9429	NA	Cell	-3.26604	20.4702	-3.19376	0.0180848	0.0795867	-3.2521
Blvrb	23.0835	22.8448	22.8613	20.8529	15.8184	NA	NA	Cell	-4.60079	21.0922	-3.4113	0.0181045	0.0795982	-3.04775
B3galt6	NA	20.6802	21.0155	NA	22.8183	22.4724	NA	Cell	1.79751	21.7466	3.77728	0.0181458	0.0796174	-2.82126
Cog6	NA	23.8942	23.7892	NA	19.7003	21.8269	NA	Cell	-3.07815	22.3026	-3.77633	0.0181612	0.0796174	-2.82216
Rbm10	NA	24.1868	23.9753	NA	26.0461	25.6344	NA	Cell	1.75925	24.9606	3.77845	0.018127	0.0796174	-2.82015
Ybx1	27.4228	25.8912	26.2288	25.5085	24.3523	25.0131	NA	Cell	-1.55628	25.7361	-3.18979	0.0181773	0.0796174	-3.25742
Aurkb	22.0693	23.7369	23.5905	19.7387	NA	NA	NA	Cell	-3.18944	22.2838	-3.77267	0.0182206	0.0797115	-2.74613
Mapk8ip3	NA	20.4724	20.7709	NA	23.4773	NA	NA	Cell	2.88427	21.5735	4.50781	0.0182501	0.0797115	-2.51933
Pwp1	NA	24.0275	23.8036	NA	20.4836	22.1056	NA	Cell	-2.62095	22.6051	-3.77128	0.0182431	0.0797115	-2.82698
Comt	21.7225	22.4313	22.4336	20.7104	19.6902	16.5449	NA	Cell	-3.21396	20.5888	-3.18391	0.0183151	0.0799203	-3.26529
Ascc3	22.1054	23.4678	23.8436	21.1379	21.7357	21.8355	NA	Cell	-1.56923	22.3543	-3.18234	0.0183522	0.0800072	-3.2674
Psat1	24.9382	25.918	25.6799	26.4239	28.2809	30.4022	NA	Cell	2.85698	26.9405	3.18058	0.0183937	0.0801131	-3.26976
Atp2a2	27.5999	27.5413	27.5805	26.6265	26.6538	26.5839	NA	Cell	-0.952478	27.0977	-3.17823	0.0184493	0.0802802	-3.27291
Cotl1	23.8339	23.4568	23.5165	21.6262	NA	NA	NA	Cell	-2.02067	23.1083	-3.75654	0.0184848	0.0803595	-2.76101
Lap3	25.582	28.0077	27.5924	28.4206	29.7944	29.1541	NA	Cell	2.06234	28.0919	3.17518	0.0185219	0.080373	-3.277
Wls	NA	22.1072	21.9077	NA	19.5904	16.5856	NA	Cell	-3.91951	20.0477	-3.75427	0.0185224	0.080373	-2.84323
Golph3l	NA	21.5107	21.5562	NA	19.8245	18.3164	NA	Cell	-2.46303	20.302	-3.75256	0.0185506	0.0804206	-2.84486
Ube2i	NA	25.5776	25.5406	NA	23.9402	22.6448	NA	Cell	-2.2666	24.4258	-3.74631	0.0186548	0.0807968	-2.85085
Acly	27.8024	27.9449	27.9331	28.5072	29.1569	29.5586	NA	Cell	1.18078	28.4839	3.1668	0.0187226	0.0808558	-3.28824
Heatr5b	21.874	20.1899	20.2451	19.5382	18.5911	16.2482	NA	Cell	-2.64379	19.4478	-3.16617	0.0187379	0.0808558	-3.28908
Zbed6	NA	18.4052	19.1039	NA	21.8011	NA	NA	Cell	3.11359	19.7701	4.46635	0.0187303	0.0808558	-2.54539
Pon3	22.2517	23.4112	23.0869	22.0233	20.8893	21.1576	NA	Cell	-1.55984	22.1367	-3.16515	0.0187625	0.0808873	-3.29045
Arhgap35	21.7687	22.5552	22.6749	19.4369	21.1383	21.2997	NA	Cell	-1.70797	21.4789	-3.16378	0.0187956	0.080955	-3.29229
Lrrc1	22.0632	22.5485	22.4209	20.3016	20.1272	15.7815	NA	Cell	-3.60747	20.5405	-3.15766	0.0189445	0.0812956	-3.30052
Polr2i	NA	21.7668	21.9847	NA	20.3078	19.4099	NA	Cell	-2.01686	20.8673	-3.73084	0.0189152	0.0812956	-2.86569
Smarca5	27.2743	27.3343	27.4281	26.0385	26.2087	26.6722	NA	Cell	-1.03911	26.826	-3.15817	0.018932	0.0812956	-3.29982
Rbpj	NA	20.8064	21.439	NA	22.8676	23.0026	NA	Cell	1.81244	22.0289	3.71943	0.0191101	0.0819307	-2.87666
Rps27l	24.8556	24.2883	24.8473	26.3745	25.381	25.8225	NA	Cell	1.19559	25.2615	3.14945	0.019146	0.0820092	-3.31154
Paip1	23.3083	24.0619	24.0083	22.1482	23.096	22.4374	NA	Cell	-1.2323	23.1767	-3.14752	0.0191937	0.0820623	-3.31413
Rsl1d1	24.6828	24.8656	24.7657	23.8997	23.1991	21.5254	NA	Cell	-1.89663	23.8231	-3.14783	0.019186	0.0820623	-3.31371
Cpa2	26.667	27.4327	27.1428	32.9783	28.8547	29.316	NA	Cell	3.30216	28.7319	3.14542	0.0192458	0.0821032	-3.31695
Dek	23.572	23.9692	24.3724	24.6991	25.1672	25.7568	NA	Cell	1.23654	24.5895	3.14359	0.0192914	0.0821032	-3.31942
Naa10	23.5691	24.5745	24.7108	25.1777	25.5943	26.509	NA	Cell	1.47555	25.0226	3.14418	0.0192767	0.0821032	-3.31863
Ppp1r8	22.8606	23.1753	23.2966	22.5396	20.4444	20.0296	NA	Cell	-2.10625	22.0577	-3.14566	0.0192398	0.0821032	-3.31663
Xpo6	19.8848	20.0371	20.0663	NA	17.6824	18.9833	NA	Cell	-1.67392	19.3308	-3.35576	0.0192583	0.0821032	-3.1131
Arl2	20.8913	22.3689	22.1203	NA	19.0445	NA	NA	Cell	-2.85946	21.1062	-3.70459	0.0193672	0.08226	-2.80929
Lig3	23.2644	23.7919	23.9921	22.279	22.8762	21.3073	NA	Cell	-1.52864	22.9185	-3.13901	0.0194059	0.08226	-3.32559
Lsm4	24.7853	25.6867	25.4374	22.9511	24.38	24.2149	NA	Cell	-1.45448	24.5759	-3.13927	0.0193993	0.08226	-3.32523
Nnt	27.0161	27.0094	27.1895	26.1334	26.2278	25.9271	NA	Cell	-0.975612	26.5839	-3.13858	0.0194166	0.08226	-3.32616
Rbm17	23.8511	23.4291	23.4818	21.1639	22.6444	22.4449	NA	Cell	-1.5029	22.8359	-3.13999	0.0193814	0.08226	-3.32427
Plin2	NA	22.8828	22.9836	NA	NA	25.7099	NA	Cell	2.76706	23.8587	4.40694	0.0194469	0.0823134	-2.58318
Nmral1	23.0905	23.8824	23.8727	24.6207	25.7704	24.6215	NA	Cell	1.38902	24.3097	3.13647	0.0194695	0.0823343	-3.32899
Cd1d1	NA	21.2644	21.0391	NA	19.1998	16.9561	NA	Cell	-3.0738	19.6149	-3.69557	0.0195256	0.0824964	-2.89969
Mars	25.9824	26.715	26.5544	25.2735	24.9455	25.5681	NA	Cell	-1.15493	25.8398	-3.13258	0.0195676	0.0825244	-3.33423
Rps6	27.3006	27.4448	27.7369	26.4852	26.1751	26.7157	NA	Cell	-1.0354	26.9764	-3.13275	0.0195636	0.0825244	-3.33401
Ctnna1	28.688	28.24	28.4293	27.9098	26.7771	26.947	NA	Cell	-1.24115	27.8318	-3.13073	0.0196145	0.0826472	-3.33672
Rps21	27.2416	27.7552	27.9161	26.4902	25.474	26.7714	NA	Cell	-1.39245	26.9414	-3.12959	0.0196435	0.0826947	-3.33826
BC017158	NA	21.7624	22.0232	NA	19.0808	NA	NA	Cell	-2.78699	20.9555	-4.37746	0.0198155	0.0832558	-2.60214
Naa50	23.8859	24.7872	24.8882	20.8777	22.9773	23.492	NA	Cell	-2.07146	23.4847	-3.12303	0.0198109	0.0832558	-3.3471
Rpl10	27.0171	27.2655	27.6768	25.6716	26.5905	26.1462	NA	Cell	-1.1837	26.7279	-3.12227	0.0198305	0.0832558	-3.34812
Cdkn2aipnl	16.7935	19.6617	20.0545	NA	21.7908	23.1573	NA	Cell	3.44136	20.2915	3.32621	0.0199059	0.0834973	-3.14807
Gm16286	20.2018	20.4223	NA	NA	23.1146	21.8072	NA	Cell	2.20655	21.3865	3.66697	0.0200377	0.0839743	-2.93029
Zfyve16	NA	25.9471	25.6741	NA	19.4546	23.0499	NA	Cell	-4.55839	23.5314	-3.66407	0.0200904	0.0841196	-2.93025
Mob4	21.627	22.7471	22.8672	NA	NA	19.8807	NA	Cell	-2.62016	21.7805	-3.65837	0.0201947	0.0843644	-2.85267
Palm3	21.3187	20.5421	21.0305	20.4577	17.5269	18.3511	NA	Cell	-2.18521	19.8712	-3.10888	0.0201773	0.0843644	-3.36618
Ppp1cc	23.8214	22.1749	22.3339	21.9249	20.5799	20.8312	NA	Cell	-1.66479	21.9444	-3.10789	0.0202032	0.0843644	-3.36751
Rpl6	28.2241	28.3434	28.7191	29.3461	29.2774	29.723	NA	Cell	1.01997	28.9389	3.10455	0.0202909	0.0846546	-3.37202
Cln6	NA	20.6526	20.2284	NA	NA	17.5695	NA	Cell	-2.83028	19.4835	-4.33211	0.0204002	0.0848096	-2.63158
Psip1	24.7343	25.6756	25.6825	24.5917	23.4488	23.0534	NA	Cell	-1.66616	24.5311	-3.10038	0.0204009	0.0848096	-3.37765
Rars	26.1376	26.9495	26.941	27.3724	28.0222	28.3006	NA	Cell	1.22235	27.2872	3.1017	0.0203659	0.0848096	-3.37586
Synj2	NA	24.8904	24.5593	NA	23.2359	22.2523	NA	Cell	-1.98071	23.7345	-3.64942	0.0203598	0.0848096	-2.94452
Rae1	22.0052	24.0044	23.8121	19.2542	21.2599	22.1183	NA	Cell	-2.39639	22.0757	-3.09942	0.0204263	0.0848392	-3.37894
Cxadr	22.8853	23.6253	23.7501	23.9113	25.9216	25.5406	NA	Cell	1.70427	24.2724	3.09596	0.0205183	0.0851456	-3.38362
Ccdc132	NA	20.811	21.223	NA	16.8646	19.1182	NA	Cell	-3.02558	19.5042	-3.63727	0.0205864	0.0851614	-2.95638
Ndufa2	23.8149	24.1187	24.1977	22.0451	NA	NA	NA	Cell	-1.95473	23.5441	-3.63484	0.0206319	0.0851614	-2.87489
Nip7	23.0882	23.2445	23.3473	19.6964	22.4669	17.811	NA	Cell	-3.2352	21.6091	-3.09199	0.0206242	0.0851614	-3.38898
Ppp2r4	23.5591	24.2862	23.9874	24.451	25.7901	25.7758	NA	Cell	1.39471	24.6416	3.09487	0.0205472	0.0851614	-3.38508
Tmem41b	NA	22.9917	23.1071	NA	NA	20.3484	NA	Cell	-2.71203	22.1491	-4.31598	0.0206135	0.0851614	-2.64213
Tmx2	23.6323	24.4292	24.4436	21.7817	23.6562	21.7816	NA	Cell	-1.76184	23.2874	-3.09432	0.020562	0.0851614	-3.38583
Asns	24.8348	25.0439	24.8121	28.6228	26.606	25.8303	NA	Cell	2.12277	25.9583	3.09048	0.0206648	0.0852218	-3.39102
Hadha	28.2246	28.6603	28.656	27.8913	26.7589	27.014	NA	Cell	-1.29224	27.8675	-3.08917	0.0206999	0.0852909	-3.39279
Eif4g3	23.0734	23.6104	23.394	20.7841	21.2531	22.8649	NA	Cell	-1.72523	22.4966	-3.08693	0.0207602	0.0853963	-3.39581
Enpep	NA	20.9243	18.7647	NA	22.8688	24.8169	NA	Cell	3.99837	21.8437	3.62795	0.0207622	0.0853963	-2.9655
Hsdl2	22.7899	22.6986	22.5896	20.3912	19.9783	22.2073	NA	Cell	-1.83373	21.7758	-3.08548	0.0207994	0.0854741	-3.39778
Rdbp	20.1086	20.7165	20.9145	17.8909	16.2805	19.8682	NA	Cell	-2.56667	19.2965	-3.08441	0.0208284	0.0855178	-3.39923
Cic	NA	18.4868	18.2852	NA	21.1231	NA	NA	Cell	2.71769	19.2984	4.29657	0.0208739	0.085629	-2.65488
Srpk2	21.8912	21.1846	21.524	20.7549	20.3738	20.2897	NA	Cell	-1.06046	21.003	-3.08133	0.020912	0.0857096	-3.40339
Cdh11	22.2718	21.4703	22.427	16.7317	20.9266	13.9803	NA	Cell	-4.84349	19.6346	-3.0751	0.0210821	0.0859529	-3.41182
Erc1	24.1394	24.243	24.6342	23.515	23.2752	23.1551	NA	Cell	-1.02374	23.827	-3.07609	0.0210549	0.0859529	-3.41047
Gdi2	27.4854	27.2322	27.2781	28.8528	28.6212	27.9056	NA	Cell	1.12794	27.8959	3.07685	0.021034	0.0859529	-3.40944
Me2	24.7169	25.4659	25.3368	21.3866	23.3882	24.308	NA	Cell	-2.1456	24.1004	-3.07584	0.0210617	0.0859529	-3.41081
Pou2f1	18.2571	21.8003	21.4489	NA	27.0438	23.5102	NA	Cell	4.55935	22.4121	3.27637	0.0210545	0.0859529	-3.20737
Ndufa7	22.0425	23.5757	23.7491	19.1002	22.0524	21.2114	NA	Cell	-2.33444	21.9552	-3.07346	0.021127	0.0860544	-3.41403
Sptan1	23.0941	24.032	24.3907	22.7334	17.4951	19.9748	NA	Cell	-3.77117	21.9534	-3.07284	0.021144	0.0860544	-3.41487
Rock1	23.0516	21.1723	21.7056	19.0403	NA	NA	NA	Cell	-3.14263	21.2425	-3.60638	0.0211758	0.0861088	-2.90191
Znf687	NA	19.7349	20.5896	NA	NA	17.1295	NA	Cell	-3.11485	19.1513	-4.26859	0.0212567	0.0862869	-2.67337
Asxl1	NA	19.5985	19.6398	NA	21.3935	23.3693	NA	Cell	2.76225	21.0003	3.59827	0.0213341	0.0865256	-2.99464
Ap1g2	NA	21.553	21.6516	NA	NA	24.282	NA	Cell	2.67025	22.4955	4.25322	0.0214708	0.0869711	-2.68358
Fastkd2	NA	21.6707	21.8275	NA	26.4395	23.8481	NA	Cell	3.39472	23.4465	3.59018	0.021493	0.0869711	-3.00261
Mrpl4	23.1682	23.7141	23.5144	18.2984	22.6613	20.6019	NA	Cell	-2.94504	21.9931	-3.05936	0.0215186	0.0869711	-3.43313
Tmem115	NA	21.5553	21.7114	NA	NA	18.9705	NA	Cell	-2.67791	20.7457	-4.25029	0.0215119	0.0869711	-2.68553
Bcl7a	22.556	23.3249	23.061	17.3305	20.773	21.6359	NA	Cell	-3.06749	21.4469	-3.0583	0.0215481	0.0870149	-3.43456
Ercc4	NA	23.0635	22.7158	NA	20.1965	16.3287	NA	Cell	-4.62711	20.5761	-3.58328	0.0216298	0.0871187	-3.00942
Rpl7	28.5294	28.8584	29.0761	28.0993	26.6947	27.5597	NA	Cell	-1.37009	28.1363	-3.05654	0.0215978	0.0871187	-3.43695
Vbp1	23.3014	23.2962	23.4676	NA	22.3743	21.2029	NA	Cell	-1.57158	22.7285	-3.25253	0.02163	0.0871187	-3.23587
38961	NA	22.6327	22.7999	NA	18.2848	20.7514	NA	Cell	-3.19819	21.1172	-3.5779	0.0217374	0.0874686	-3.01474
Bag6	25.3542	25.7903	25.7036	24.8301	24.531	23.5774	NA	Cell	-1.30318	24.9644	-3.051	0.0217544	0.0874686	-3.44446
Mrpl47	NA	22.2286	22.199	NA	23.6629	24.5816	NA	Cell	1.90843	23.168	3.5759	0.0217773	0.0874851	-3.01671
Slc9a3r2	21.405	23.4951	23.4209	17.1196	20.5301	21.2739	NA	Cell	-3.1325	21.2074	-3.04776	0.0218463	0.0876866	-3.44884
Atp11b	NA	21.2159	20.9851	NA	19.3778	19.5599	NA	Cell	-1.63157	20.2847	-3.56976	0.021901	0.0878305	-3.02279
Tkt	28.7369	28.7033	28.6169	30.2565	29.3856	29.6494	NA	Cell	1.07811	29.2248	3.04479	0.0219313	0.0878763	-3.45288
Fam195b	21.2231	24.4499	24.9157	20.4836	19.7349	21.5088	NA	Cell	-2.95382	22.0527	-3.04283	0.0219874	0.0880253	-3.45553
Prkar2b	22.8718	22.5018	22.4282	21.9249	20.1029	18.2774	NA	Cell	-2.49888	21.3512	-3.04041	0.022057	0.0882279	-3.45882
Nipsnap1	NA	23.602	23.6302	NA	22.1797	21.6883	NA	Cell	-1.68212	22.775	-3.55786	0.0221428	0.0884952	-3.03457
Cdkal1	NA	21.3194	21.3341	NA	23.3179	22.752	NA	Cell	1.7082	22.1809	3.55256	0.0222515	0.0887682	-3.03983
Ndufb10	25.2677	25.0888	24.8305	24.4118	22.9303	23.8193	NA	Cell	-1.34188	24.3914	-3.03311	0.0222683	0.0887682	-3.46872
Rps6ka3	24.653	24.8041	24.8311	25.2867	26.2003	26.1562	NA	Cell	1.11832	25.3219	3.03383	0.0222474	0.0887682	-3.46775
Pick1	NA	20.4206	20.7782	NA	24.0099	22.3214	NA	Cell	2.56622	21.8825	3.55063	0.0222913	0.0887839	-3.04174
Ahsg	20.2402	23.7762	23.9897	24.5293	26.2052	25.9592	NA	Cell	2.89588	24.1166	3.03097	0.0223308	0.0888653	-3.47164
Lrrc47	25.1171	24.8476	24.8908	22.5641	23.9503	24.0316	NA	Cell	-1.43652	24.2336	-3.02914	0.022384	0.089001	-3.47411
Smc2	26.3193	27.3879	27.3124	24.9503	25.7649	26.2073	NA	Cell	-1.3657	26.3237	-3.02697	0.0224477	0.0891778	-3.47706
Dnmt3b	NA	20.2179	19.7157	NA	22.7854	21.4716	NA	Cell	2.16164	21.0477	3.54164	0.0224776	0.0892205	-3.05068
Tra2a	22.2678	22.5635	22.4295	22.9941	24.4948	23.7064	NA	Cell	1.31153	23.076	3.02498	0.0225064	0.0892586	-3.47977
Ssrp1	25.8805	25.797	25.9559	24.2058	25.3974	24.0491	NA	Cell	-1.32708	25.2143	-3.02026	0.0226457	0.0895823	-3.48618
Syncrip	28.2792	27.9697	28.0562	27.5644	25.1236	26.2429	NA	Cell	-1.79142	27.206	-3.02036	0.0226428	0.0895823	-3.48605
Lamtor2	21.87	21.3248	21.9142	18.5618	20.5128	NA	NA	Cell	-2.14539	20.8367	-3.21056	0.0226868	0.0895925	-3.28626
Xpnpep3	20.7541	21.8667	21.9544	NA	20.2598	18.1327	NA	Cell	-2.4029	20.5935	-3.21086	0.0226789	0.0895925	-3.2859
Csnk2a2	23.6713	23.9938	24.3241	23.0776	22.2303	23.1288	NA	Cell	-1.1842	23.4043	-3.01462	0.0228136	0.0899425	-3.49385
Mrpl33	NA	22.1331	21.9786	NA	20.087	20.6213	NA	Cell	-1.70164	21.205	-3.52563	0.022814	0.0899425	-3.06663
Rpl17	27.6376	28.0681	28.4175	27.4444	24.6192	25.5188	NA	Cell	-2.18027	26.9509	-3.01374	0.0228399	0.0899682	-3.49505
Dctn1	26.2582	26.5746	26.6833	24.8642	25.9914	25.02	NA	Cell	-1.21349	25.8986	-3.01213	0.0228879	0.090081	-3.49723
Slc9a1	NA	19.4101	19.8047	NA	21.3692	21.1602	NA	Cell	1.65729	20.436	3.51853	0.0229652	0.0903091	-3.07372
Thoc3	24.2178	21.9931	21.8268	21.0028	NA	18.1506	NA	Cell	-3.16841	21.4382	-3.19444	0.0231079	0.0907934	-3.30569
Ptges3	NA	19.1231	19.9754	NA	21.3882	21.3741	NA	Cell	1.83185	20.4652	3.51054	0.0231366	0.0908297	-3.08171
Wnk1	21.6843	22.3494	22.1836	20.8133	20.6904	NA	NA	Cell	-1.30991	21.5442	-3.19172	0.0231799	0.0909228	-3.30897
Fam114a2	21.0031	22.1182	22.1123	17.5721	18.2281	21.281	NA	Cell	-2.71751	20.3858	-3.00161	0.0232057	0.0909475	-3.51154
Arpc5l	23.6753	24.0932	24.0576	22.7122	23.2066	22.9698	NA	Cell	-0.979181	23.4525	-2.99911	0.0232818	0.091016	-3.51494
Hmg20a	23.2233	24.1164	24.0196	16.1341	22.8028	19.5426	NA	Cell	-4.29322	21.6398	-2.99997	0.0232555	0.091016	-3.51377
Scamp2	22.5971	22.0283	21.7402	20.8537	NA	17.5808	NA	Cell	-2.91358	20.96	-3.18805	0.0232773	0.091016	-3.3134
Pin4	22.143	23.4033	23.5486	18.4255	18.3003	22.5581	NA	Cell	-3.27035	21.3965	-2.99646	0.0233631	0.0912572	-3.51856
Pabpc4	26.4572	27.5001	27.2946	25.7842	26.1221	25.937	NA	Cell	-1.13619	26.5159	-2.99427	0.0234301	0.091442	-3.52153
Rnpep	23.4221	24.1394	24.1507	24.9816	24.9113	24.9561	NA	Cell	1.04561	24.4269	2.9928	0.0234753	0.091542	-3.52354
Hypk	22.5247	23.2959	23.0003	21.0129	16.1194	NA	NA	Cell	-4.36834	21.1906	-3.17786	0.0235503	0.0916444	-3.32572
Skp1	25.8652	25.8358	25.728	23.7471	24.8563	25.019	NA	Cell	-1.26886	25.1752	-2.99122	0.0235243	0.0916444	-3.5257
Zim1	21.7744	21.7206	21.92	18.4062	21.068	20.1106	NA	Cell	-1.94338	20.8333	-2.99004	0.0235606	0.0916444	-3.5273
Map2k2	22.542	22.2934	22.2984	21.2663	19.3966	21.4163	NA	Cell	-1.68487	21.5355	-2.98819	0.0236178	0.0917901	-3.52982
Emc3	23.3739	23.8073	23.8769	NA	20.0084	22.5632	NA	Cell	-2.43021	22.7259	-3.16735	0.0238357	0.0923298	-3.33843
Rab14	25.2741	26.1494	25.8928	24.0287	25.0283	24.7094	NA	Cell	-1.18331	25.1805	-2.98182	0.0238163	0.0923298	-3.5385
Snap29	NA	23.8156	22.4354	NA	25.2101	26.331	NA	Cell	2.6451	24.448	3.48124	0.0237782	0.0923298	-3.11109
Sord	NA	22.007	21.7299	NA	24.7027	23.3305	NA	Cell	2.14819	22.9425	3.47812	0.0238479	0.0923298	-3.11423
Vps26a	22.5936	23.6289	23.9605	20.5596	22.7884	21.3041	NA	Cell	-1.84364	22.4725	-2.98056	0.0238558	0.0923298	-3.54022
Dhx16	20.5643	21.1434	21.1098	18.8913	NA	NA	NA	Cell	-1.97587	20.4272	-3.47566	0.0239028	0.0924022	-3.02797
Hsp90b1	30.6205	30.3746	30.4198	31.3491	31.329	31.473	NA	Cell	0.912065	30.9277	2.9787	0.0239142	0.0924022	-3.54276
Heatr3	NA	21.7174	21.932	NA	NA	19.2558	NA	Cell	-2.58952	20.9684	-4.08862	0.0239455	0.0924464	-2.79537
Emc8	23.7596	23.867	23.9605	22.1996	22.8223	23.2484	NA	Cell	-1.10557	23.3096	-2.97554	0.0240136	0.0926324	-3.54706
Cnpy3	22.4518	23.8857	23.8358	21.7704	22.1827	22.1692	NA	Cell	-1.35035	22.7159	-2.97278	0.024101	0.0926626	-3.55083
Ehd2	22.9078	24.054	23.7345	24.5348	24.6395	25.2212	NA	Cell	1.23305	24.182	2.9738	0.0240688	0.0926626	-3.54944
Lamp2	25.1245	24.3645	23.9225	26.1879	26.2576	25.0897	NA	Cell	1.37458	25.1578	2.97333	0.0240835	0.0926626	-3.55007
Srsf7	26.0631	25.9831	26.3466	27.9463	27.385	26.7326	NA	Cell	1.22368	26.7428	2.97439	0.0240502	0.0926626	-3.54864
Clns1a	21.5977	22.6967	22.5761	20.9494	NA	19.3444	NA	Cell	-2.10426	21.4329	-3.15534	0.0241664	0.0927607	-3.35298
Prpf40a	24.6648	24.3465	24.7256	25.39	25.8626	25.4677	NA	Cell	0.994436	25.0762	2.97132	0.0241475	0.0927607	-3.55283
Tbx2	NA	20.6153	20.7729	NA	18.1123	NA	NA	Cell	-2.56668	19.8335	-4.07329	0.0241939	0.0927899	-2.806
Polr2l	NA	23.5813	23.2047	NA	24.9463	25.0502	NA	Cell	1.60528	24.1956	3.45827	0.0242959	0.0931042	-3.13423
Pex6	NA	20.6783	21.3839	NA	18.124	NA	NA	Cell	-2.83934	20.062	-4.06519	0.0243266	0.0931453	-2.81164
Rps5	26.9931	26.7811	27.0792	24.3224	26.2573	25.6078	NA	Cell	-1.55526	26.1735	-2.96303	0.0244121	0.0933959	-3.56413
Arap1	22.8357	23.0428	22.9724	20.6912	21.8408	22.2715	NA	Cell	-1.34909	22.2757	-2.96037	0.0244977	0.0936464	-3.56776
Ascc2	20.1908	21.9609	21.5776	NA	19.8112	18.8395	NA	Cell	-2.01875	20.476	-3.14047	0.0245832	0.0937871	-3.37102
Ift74	NA	19.3239	20.0323	NA	21.1649	21.7698	NA	Cell	1.78924	20.5727	3.44678	0.0245599	0.0937871	-3.14584
Snx12	NA	23.0072	22.998	NA	21.549	21.3579	NA	Cell	-1.54914	22.2281	-3.44526	0.024595	0.0937871	-3.14738
Aldh4a1	24.2793	24.3222	24.176	19.5361	23.842	20.4746	NA	Cell	-2.97492	22.7717	-2.95315	0.0247318	0.0942319	-3.57762
Dlgap4	20.8744	20.3137	19.933	22.6031	NA	NA	NA	Cell	2.13321	20.931	3.43651	0.0247987	0.094281	-3.06633
Nans	27.0635	24.3331	24.7038	31.3335	27.6652	26.9872	NA	Cell	3.29518	27.0144	2.94966	0.024846	0.094281	-3.58239
Stx18	24.3172	23.0447	23.1492	25.0448	24.9301	24.4066	NA	Cell	1.29018	24.1488	2.9497	0.0248448	0.094281	-3.58234
Sucla2	26.9275	25.7089	25.8122	25.2876	24.8908	24.3837	NA	Cell	-1.29551	25.5018	-2.95	0.0248349	0.094281	-3.58193
Usp4	23.5254	23.9333	23.5725	24.1756	26.2849	25.3049	NA	Cell	1.57808	24.4661	2.95065	0.0248137	0.094281	-3.58105
Prune	21.1275	23.3066	23.3388	NA	20.896	18.5561	NA	Cell	-3.00543	21.445	-3.1283	0.0249302	0.0945236	-3.38582
Eps8l2	23.8973	23.785	23.3131	22.0265	23.124	22.2393	NA	Cell	-1.20182	23.0642	-2.9464	0.0249531	0.0945324	-3.58686
Exoc5	19.6705	21.1523	19.8814	27.0629	22.1423	22.7425	NA	Cell	3.7478	22.1086	2.9454	0.024986	0.0945324	-3.58822
Ube2t	NA	20.2553	19.6055	NA	NA	22.6374	NA	Cell	2.76936	20.8327	4.02531	0.0249934	0.0945324	-2.83957
Ap1g1	25.0082	26.0441	26.0483	24.9006	24.0269	23.9966	NA	Cell	-1.39217	25.0041	-2.94194	0.0251004	0.0946763	-3.59295
Cnot10	22.3356	22.8245	23.0734	NA	21.719	20.0267	NA	Cell	-1.9109	21.9958	-3.12369	0.0250631	0.0946763	-3.39142
Kdm5b	NA	24.1192	24.3285	NA	22.2296	22.8701	NA	Cell	-1.67403	23.3868	-3.42318	0.0251128	0.0946763	-3.16977
Znf423	NA	16.7418	16.5322	NA	20.5757	18.3551	NA	Cell	2.82845	18.0512	3.42424	0.0250877	0.0946763	-3.16869
Sod1	26.9402	26.3806	26.4804	29.1882	27.2984	27.798	NA	Cell	1.49448	27.3476	2.93417	0.0253589	0.0954495	-3.60357
Bnip1	22.0338	22.1389	22.4206	21.7219	18.7688	17.6823	NA	Cell	-2.80677	20.7944	-2.93331	0.0253878	0.0954811	-3.60475
Cdk12	19.1469	20.1488	20.5656	17.2785	NA	NA	NA	Cell	-2.52031	19.285	-3.40945	0.0254411	0.0955315	-3.09302
Numbl	20.7565	20.6613	20.8638	18.9778	NA	NA	NA	Cell	-1.78199	20.3148	-3.4094	0.0254422	0.0955315	-3.09307
Basp1	27.0512	26.2991	26.289	24.4978	24.3623	26.0279	NA	Cell	-1.58376	25.7545	-2.93055	0.0254805	0.0955537	-3.60853
Cstf3	24.9393	24.5703	24.7972	21.9816	23.9887	23.4768	NA	Cell	-1.61992	23.959	-2.93014	0.0254943	0.0955537	-3.60909
Wdr4	NA	20.8347	21.0195	NA	22.2669	23.0107	NA	Cell	1.71169	21.7829	3.40661	0.0255097	0.0955537	-3.18663
Plscr1	21.983	20.3655	21.0404	22.7139	24.2086	22.2612	NA	Cell	1.9316	22.0954	2.92436	0.0256899	0.0961512	-3.617
Appl1	20.4824	22.0232	21.8532	24.4102	23.0012	22.6705	NA	Cell	1.90767	22.4068	2.92172	0.0257794	0.096272	-3.62061
Chp1	23.1968	25.1857	24.9352	22.8374	22.4879	19.746	NA	Cell	-2.74879	23.0648	-2.92098	0.0258049	0.096272	-3.62163
Rps16	29.5203	29.352	29.4054	28.4418	28.3266	28.7482	NA	Cell	-0.920377	28.9657	-2.92109	0.0258011	0.096272	-3.62148
Sun1	22.5575	23.2255	23.6711	22.2004	21.3928	22.0878	NA	Cell	-1.25767	22.5225	-2.92155	0.0257852	0.096272	-3.62084
Abcb7	22.8679	23.8441	23.9165	20.5305	22.8233	22.0595	NA	Cell	-1.73842	22.6736	-2.91691	0.0259442	0.0964212	-3.62721
Dcakd	26.3121	26.5042	26.3999	25.9414	24.4643	24.8881	NA	Cell	-1.30745	25.7517	-2.91618	0.0259691	0.0964212	-3.6282
Iqgap3	19.3685	21.3495	21.2336	NA	17.5429	NA	NA	Cell	-3.24187	19.8736	-3.38808	0.0259624	0.0964212	-3.1142
Mrps27	23.2354	24.4157	24.2966	19.6671	21.9659	23.1661	NA	Cell	-2.38287	22.7911	-2.91733	0.0259296	0.0964212	-3.62662
Pi4ka	20.9617	21.7172	21.5838	17.992	17.1642	21.0117	NA	Cell	-2.69829	20.0718	-2.91787	0.0259112	0.0964212	-3.62589
Qtrtd1	22.9351	20.6172	20.867	20.8428	18.3222	17.731	NA	Cell	-2.50777	20.2192	-2.91856	0.0258875	0.0964212	-3.62494
Rpl24	27.2904	27.7734	27.7704	26.4	26.8856	26.6475	NA	Cell	-0.96701	27.1279	-2.91546	0.0259937	0.0964356	-3.62918
Scmh1	NA	18.1795	18.2741	NA	11.8909	15.7625	NA	Cell	-4.40008	16.0268	-3.37769	0.0262201	0.0971981	-3.21616
Hadhb	27.3479	27.4427	27.3445	26.3023	26.7726	26.2476	NA	Cell	-0.937505	26.9096	-2.90768	0.0262629	0.0972791	-3.63985
Mcm3ap	20.3087	21.3322	21.47	17.4239	20.422	19.0037	NA	Cell	-2.08713	19.9934	-2.90482	0.0263625	0.0975704	-3.64377
Exoc6	NA	20.4342	20.1656	NA	17.9144	18.9046	NA	Cell	-1.89038	19.3547	-3.36804	0.0264624	0.0978518	-3.22605
Krt16	25.632	23.2817	23.7594	26.044	26.2616	25.7592	NA	Cell	1.79725	25.123	2.90145	0.0264805	0.0978518	-3.64839
Atl3	25.6656	25.4784	25.4022	24.206	24.9167	23.0129	NA	Cell	-1.47015	24.7803	-2.89995	0.0265332	0.0979686	-3.65045
Nckap1	24.6039	24.4556	24.3546	23.7642	23.6299	22.8404	NA	Cell	-1.05983	23.9414	-2.89906	0.0265643	0.0980059	-3.65166
Csnk2a1	26.1165	25.7269	25.6647	26.7238	26.7003	26.8666	NA	Cell	0.927538	26.2998	2.89697	0.026638	0.0982	-3.65453
Hnrnph1	28.8126	29.0855	29.1285	28.4764	26.1003	27.2159	NA	Cell	-1.74469	28.1366	-2.89586	0.0266773	0.0982669	-3.65605
Atg2b	NA	20.0801	20.0741	NA	16.7439	18.5453	NA	Cell	-2.43249	18.8608	-3.35308	0.0268431	0.0987997	-3.24142
Ska3	NA	23.1124	22.4378	NA	20.0322	21.2059	NA	Cell	-2.15609	21.6971	-3.35069	0.0269046	0.0989477	-3.24388
Srp54	25.4785	25.7932	25.7412	28.2341	27.2236	26.2143	NA	Cell	1.55301	26.4475	2.88868	0.0269324	0.0989718	-3.6659
Vps4a	NA	21.8179	21.4876	NA	NA	19.1055	NA	Cell	-2.5156	20.8037	-3.91331	0.0269945	0.0991217	-2.91949
Zfp219	NA	20.1095	19.9384	NA	17.5749	NA	NA	Cell	-2.46552	19.2076	-3.90854	0.0270842	0.0993726	-2.92294
Apob	27.1494	26.6683	26.7925	27.3187	31.7152	30.594	NA	Cell	3.0059	28.373	2.88134	0.027196	0.0995476	-3.67598
Zfp207	NA	23.8364	24.1716	NA	25.6573	27.9139	NA	Cell	2.78158	25.3948	3.33855	0.0272192	0.0995544	-3.25638
Cdk5rap3	22.836	22.7809	22.8367	24.0651	23.4103	23.8283	NA	Cell	0.950068	23.2929	2.87972	0.0272546	0.0996055	-3.6782
Dkc1	23.2274	23.8169	24.009	24.176	25.6436	25.1145	NA	Cell	1.29358	24.3312	2.87505	0.0274242	0.100016	-3.68462
Nenf	24.8898	23.4512	23.518	18.6484	21.5736	22.6236	NA	Cell	-3.00446	22.4508	-2.87602	0.0273889	0.100016	-3.68329
Usp16	NA	19.938	20.1826	NA	21.3773	22.4291	NA	Cell	1.84293	20.9818	3.33045	0.0274315	0.100016	-3.26474
Ehbp1	18.5098	18.2766	18.6102	NA	NA	16.723	NA	Cell	-1.77032	18.0299	-3.32692	0.0275247	0.10022	-3.17525
Eppk1	24.5271	26.008	25.74	23.791	24.346	24.263	NA	Cell	-1.29172	24.7792	-2.87205	0.0275336	0.10022	-3.68874
Rbm8a	24.5489	23.7167	24.0964	25.358	27.607	25.2911	NA	Cell	1.96467	25.103	2.87155	0.027552	0.10022	-3.68943
Mcm4	27.0772	27.717	27.5189	23.9762	26.3497	26.3781	NA	Cell	-1.86967	26.5029	-2.87091	0.0275752	0.100227	-3.6903
Tusc3	NA	22.4182	22.0505	NA	20.3584	17.5121	NA	Cell	-3.29904	20.5848	-3.3178	0.027767	0.100845	-3.27782
Ehmt1	24.0047	23.4338	23.2776	22.8964	21.9554	22.5487	NA	Cell	-1.10522	23.0194	-2.86317	0.0278604	0.101105	-3.70094
Ptbp1	28.4956	28.6332	28.424	27.667	26.105	27.5894	NA	Cell	-1.39715	27.8191	-2.86258	0.0278824	0.101106	-3.70175
Ankrd52	NA	21.1494	21.2728	NA	22.7957	22.6167	NA	Cell	1.49512	21.9586	3.30883	0.0280079	0.101482	-3.28711
Marc2	24.6625	24.2452	23.7833	25.9848	25.2786	24.8913	NA	Cell	1.15455	24.8076	2.85385	0.0282081	0.101812	-3.71376
Ppp4r2	24.6209	24.0418	24.1602	23.9029	21.7528	22.4693	NA	Cell	-1.56592	23.4913	-2.85463	0.0281788	0.101812	-3.71268
Prmt3	21.4602	22.7601	22.5495	NA	20.2724	21.0525	NA	Cell	-1.67066	21.6189	-3.02412	0.0281356	0.101812	-3.51334
St5	NA	20.4146	20.5256	NA	18.0403	NA	NA	Cell	-2.41908	19.6601	-3.85071	0.0282016	0.101812	-2.96511
Trmt1l	21.2913	23.0044	22.8268	NA	20.0701	20.9606	NA	Cell	-1.9628	21.6306	-3.02257	0.0281863	0.101812	-3.51524
Ak4	20.4975	23.3133	23.4637	19.1497	20.0804	21.0737	NA	Cell	-2.3236	21.263	-2.84733	0.0284541	0.102541	-3.72273
Slc25a1	23.5773	22.7094	23.0603	22.1965	21.0281	NA	NA	Cell	-1.50869	22.5143	-3.01485	0.0284424	0.102541	-3.52477
Plekhg5	NA	20.8434	20.684	NA	19.4755	18.8756	NA	Cell	-1.58818	19.9696	-3.28515	0.0286554	0.103186	-3.3117
Idh1	25.2189	26.3568	26.2858	31.2574	27.8636	27.4547	NA	Cell	2.90479	27.4062	2.83979	0.0287412	0.103415	-3.7331
Lmf2	21.4567	20.8924	21.0064	NA	22.0625	22.6301	NA	Cell	1.26023	21.6096	3.0015	0.0288907	0.103873	-3.54124
Mbd3	24.3621	23.7855	23.841	23.1362	22.0649	NA	NA	Cell	-1.41059	23.438	-2.99598	0.0290781	0.104466	-3.54804
Arl8b	24.4772	25.3402	25.2761	26.262	26.0953	25.9243	NA	Cell	1.06274	25.5625	2.8279	0.0292005	0.104717	-3.74947
Kpnb1	28.4721	28.6508	28.5667	26.607	27.7066	27.8581	NA	Cell	-1.17266	27.9769	-2.82752	0.0292156	0.104717	-3.75001
Itm2b	21.8744	21.1	21.2045	22.1396	26.466	24.1791	NA	Cell	2.86861	22.8273	2.82676	0.0292453	0.104743	-3.75106
Sts	NA	21.2508	20.4783	NA	23.5317	22.2501	NA	Cell	2.02633	21.8777	3.26129	0.0293257	0.10487	-3.33658
Fam151a	17.1876	20.7024	21.0735	20.6169	24.092	24.1493	NA	Cell	3.2982	21.3036	2.8219	0.0294354	0.105109	-3.75774
Pik3c3	NA	21.7048	21.5399	NA	19.2486	NA	NA	Cell	-2.38956	20.8311	-3.79003	0.0294378	0.105109	-3.01
Ccz1	NA	20.6961	21.0381	NA	22.2917	22.4292	NA	Cell	1.49328	21.6138	3.25522	0.0294991	0.105235	-3.34293
Ezh2	22.4948	20.2602	19.3995	28.1599	22.3275	23.5303	NA	Cell	3.95443	22.6954	2.81808	0.029586	0.105235	-3.76301
Mrps25	22.8576	22.8393	22.9622	20.3637	17.6165	22.1327	NA	Cell	-2.84869	21.462	-2.81855	0.0295675	0.105235	-3.76236
Tmpo	27.0111	26.1942	26.1292	26.2095	23.5618	23.3014	NA	Cell	-2.08728	25.4012	-2.8188	0.0295574	0.105235	-3.76201
Upf1	26.3052	26.4173	26.3379	25.5982	25.5801	24.5394	NA	Cell	-1.11422	25.7963	-2.81942	0.0295331	0.105235	-3.76117
Sorl1	NA	23.3492	23.5397	NA	NA	21.0746	NA	Cell	-2.38811	22.6545	-3.77946	0.0296602	0.105371	-3.01789
Surf4	24.9991	24.0397	23.9817	23.7025	22.4779	23.0966	NA	Cell	-1.24781	23.7163	-2.81597	0.0296697	0.105371	-3.76593
Slc25a12	23.5744	24.2159	24.238	23.3157	22.8984	22.2263	NA	Cell	-1.19595	23.4115	-2.80529	0.030096	0.106804	-3.78065
Pip5k1a	NA	18.0752	NA	NA	20.7354	20.2732	NA	Cell	2.47354	19.6946	3.75774	0.0301238	0.106821	-3.03417
Ears2	NA	21.0441	21.1154	NA	NA	18.7333	NA	Cell	-2.35325	20.2976	-3.75255	0.0302359	0.107056	-3.03807
Morf4l2	22.7728	23.008	23.0098	21.9707	NA	21.5697	NA	Cell	-1.15253	22.4662	-2.96295	0.0302299	0.107056	-3.58893
Ndufs4	24.853	25.749	25.5345	24.7389	23.9489	23.7471	NA	Cell	-1.23381	24.7619	-2.79678	0.0304404	0.10768	-3.79239
Ppp4c	23.6404	23.7296	23.5747	22.7966	22.9834	21.7993	NA	Cell	-1.1218	23.0874	-2.79578	0.0304814	0.10768	-3.79377
Tsta3	22.2355	21.4551	21.1993	NA	19.5071	NA	NA	Cell	-2.0893	21.0992	-3.22199	0.03047	0.10768	-3.2816
Iqgap1	27.4451	27.7781	27.6738	27.9287	29.5746	29.5428	NA	Cell	1.38303	28.3238	2.79499	0.0305136	0.107711	-3.79486
Lbr	25.4188	24.5881	25.2126	21.6002	23.0007	24.5417	NA	Cell	-2.02564	24.0603	-2.79327	0.0305841	0.107878	-3.79724
Prmt6	NA	22.6111	21.0374	NA	20.1009	18.928	NA	Cell	-2.30982	20.6694	-3.21692	0.0306213	0.107928	-3.38311
Hmgn1	23.6949	23.9849	24.5729	23.3228	20.4402	22.4193	NA	Cell	-2.02345	23.0725	-2.79021	0.0307094	0.108124	-3.80146
Mrpl38	20.4697	22.5836	22.1142	26.7109	23.5018	23.5775	NA	Cell	2.87422	23.1596	2.78987	0.0307233	0.108124	-3.80192
Yipf3	NA	22.2756	21.9343	NA	19.2286	20.6936	NA	Cell	-2.14385	21.033	-3.20977	0.0308365	0.10844	-3.39064
Clasp1	23.8112	23.8422	23.9427	23.4479	22.3621	22.49	NA	Cell	-1.09873	23.316	-2.78267	0.0310214	0.108598	-3.81188
Ints4	22.8376	23.6917	24.0293	22.1395	22.7598	22.1405	NA	Cell	-1.1729	22.9331	-2.78452	0.0309443	0.108598	-3.80931
Ndufv1	25.4314	26.3184	26.2905	25.145	24.736	24.9305	NA	Cell	-1.07626	25.4753	-2.7827	0.0310201	0.108598	-3.81183
Ostf1	NA	21.4866	21.3091	NA	19.0658	NA	NA	Cell	-2.34911	20.6205	-3.72202	0.0309062	0.108598	-3.06112
Ppp2r5e	NA	22.2824	22.4433	NA	20.8623	18.9143	NA	Cell	-2.47454	21.1256	-3.20525	0.0309732	0.108598	-3.39541
Tbc1d2b	20.8608	19.7703	20.0888	21.0584	21.4065	21.832	NA	Cell	1.19233	20.8361	2.7833	0.0309951	0.108598	-3.811
Capza2	26.0761	25.5823	25.4272	25.9943	30.166	30.7007	NA	Cell	3.25846	27.3244	2.77726	0.031247	0.108653	-3.81935
Chmp5	22.4199	22.2913	22.6882	NA	23.9044	23.421	NA	Cell	1.19182	22.9449	2.93554	0.0312243	0.108653	-3.62298
Dsg1a	NA	20.52	19.261	NA	24.1008	21.6139	NA	Cell	2.96684	21.3739	3.1976	0.0312066	0.108653	-3.40349
Fads2	23.7745	24.1414	24.4126	23.2465	22.8139	20.9151	NA	Cell	-1.78435	23.2173	-2.77835	0.0312013	0.108653	-3.81784
Hmgb2	28.1405	27.3533	27.9185	27.5151	25.374	25.6939	NA	Cell	-1.60977	26.9992	-2.78059	0.0311079	0.108653	-3.81475
Poldip2	23.8225	24.4508	24.2991	NA	20.0788	23.1236	NA	Cell	-2.62499	23.155	-2.93606	0.031205	0.108653	-3.62233
Ripk3	NA	21.3253	20.7733	NA	19.5909	19.4505	NA	Cell	-1.52863	20.285	-3.1995	0.0311484	0.108653	-3.40147
Sdr39u1	19.6844	20.9675	20.7513	22.6113	NA	NA	NA	Cell	2.29397	21.0036	3.19629	0.0312468	0.108653	-3.30797
Sfpq	28.0246	27.8325	28.1303	27.0828	27.1321	27.2143	NA	Cell	-0.852738	27.5694	-2.78147	0.0310712	0.108653	-3.81353
UPF0687proteinC20orf27homologOS=MusmusculusPE=2SV=3	NA	20.8628	21.1522	NA	18.0112	19.6605	NA	Cell	-2.17171	19.9217	-3.19212	0.0313749	0.109016	-3.40927
Pbrm1	24.1187	24.5848	24.9415	25.2095	25.5181	26.017	NA	Cell	1.03321	25.065	2.77137	0.031495	0.109119	-3.82749
Stk39	22.0298	21.7917	21.3136	22.0758	24.2972	24.0213	NA	Cell	1.75306	22.5882	2.76976	0.0315629	0.109262	-3.82971
Tead1	22.0562	22.571	22.3461	20.5348	21.9256	19.4281	NA	Cell	-1.69496	21.477	-2.76865	0.0316097	0.109342	-3.83124
Mblac2	NA	21.544	21.6106	NA	23.0214	24.976	NA	Cell	2.42139	22.788	3.18136	0.0317084	0.109521	-3.42065
Ptpn13	20.5758	21.7858	21.9864	19.9188	19.2234	20.7276	NA	Cell	-1.49275	20.703	-2.76688	0.0316849	0.109521	-3.83369
Ubl4a	23.6063	24.1111	23.9759	22.3273	23.4944	22.5122	NA	Cell	-1.11977	23.3379	-2.76455	0.0317842	0.109701	-3.83691
Cox5b	25.4721	25.7783	26.0651	26.1256	27.2898	27.6794	NA	Cell	1.25978	26.4017	2.76295	0.0318528	0.109801	-3.83913
Nmd3	NA	21.558	21.6336	NA	19.2093	20.3497	NA	Cell	-1.81631	20.6877	-3.17651	0.0318602	0.109801	-3.42579
Epb4.1	25.1327	24.3854	24.5993	24.3056	22.5453	23.2491	NA	Cell	-1.33915	24.0362	-2.76094	0.0319387	0.10999	-3.84191
Acot9	21.4965	22.181	22.358	20.8564	20.5512	21.3811	NA	Cell	-1.08225	21.4707	-2.75391	0.0322418	0.110219	-3.85163
Alad	23.6995	24.4564	24.1158	19.1382	22.6225	22.86	NA	Cell	-2.55027	22.8154	-2.75609	0.0321476	0.110219	-3.84862
Arfgef1	21.7825	22.4914	22.5906	22.4577	26.1698	27.1798	NA	Cell	2.98095	23.7786	2.75422	0.0322283	0.110219	-3.8512
Eef1e1	22.6405	24.2031	24.4496	21.6081	22.0488	22.9938	NA	Cell	-1.5475	22.9906	-2.75562	0.0321678	0.110219	-3.84927
Eif4ebp2	NA	18.0666	18.0931	NA	NA	20.3779	NA	Cell	2.29548	18.8458	3.66433	0.0322247	0.110219	-3.10514
Gns	21.9104	21.4543	20.9238	20.8022	18.4815	19.9611	NA	Cell	-1.68123	20.5889	-2.75826	0.0320539	0.110219	-3.84561
Gusb	23.9274	24.8339	24.5263	23.4982	23.6274	22.9179	NA	Cell	-1.08136	23.8885	-2.75508	0.0321911	0.110219	-3.85001
Krt19	26.4191	26.2927	26.429	27.0691	27.1487	27.5967	NA	Cell	0.891201	26.8259	2.75726	0.0320971	0.110219	-3.847
Pafah1b1	25.6307	25.8115	25.8355	26.6744	26.4335	26.7415	NA	Cell	0.857212	26.1879	2.7568	0.032117	0.110219	-3.84764
Rwdd1	22.2232	22.0275	22.8672	23.5267	23.3164	23.258	NA	Cell	0.994429	22.8698	2.75622	0.0321417	0.110219	-3.84843
Exosc5	NA	23.4964	23.4061	NA	20.6496	22.1283	NA	Cell	-2.06228	22.4201	-3.16302	0.0322868	0.110291	-3.44011
Alkbh8	NA	20.0259	19.8849	NA	18.7143	18.2255	NA	Cell	-1.48552	19.2126	-3.15294	0.0326099	0.111313	-3.45082
Gm10094	22.3699	23.4882	23.7344	23.529	25.8982	25.4557	NA	Cell	1.76343	24.0793	2.74225	0.032751	0.111661	-3.86776
Ppp4r4	NA	18.4849	18.8927	NA	19.9148	20.745	NA	Cell	1.64114	19.5093	3.14831	0.0327595	0.111661	-3.45575
Rxra	21.7061	21.0245	21.386	21.0085	15.1846	17.5165	NA	Cell	-3.46901	19.6377	-2.74084	0.0328131	0.111761	-3.86971
Cops7a	24.3259	24.4329	24.5433	28.0738	26.0687	25.0955	NA	Cell	1.97863	25.4233	2.73956	0.0328699	0.111873	-3.87149
Nup54	25.1521	24.6621	24.7996	24.6763	20.5852	21.6265	NA	Cell	-2.57529	23.5836	-2.73832	0.0329246	0.111896	-3.8732
Sf3a2	22.8258	24.1096	24.348	26.0408	24.9037	24.9843	NA	Cell	1.54846	24.5353	2.73862	0.0329112	0.111896	-3.87278
Prkar1b	NA	20.5037	20.5347	NA	18.2429	NA	NA	Cell	-2.27337	19.7604	-3.6288	0.0330721	0.112233	-3.13255
Slc25a36	NA	19.8288	19.9195	NA	18.1167	18.6473	NA	Cell	-1.49212	19.1281	-3.13927	0.0330538	0.112233	-3.46538
Psmd7	24.7094	26.128	26.0864	24.5195	24.5167	23.6435	NA	Cell	-1.41471	24.9339	-2.73428	0.0331044	0.112261	-3.87881
Manf	23.9845	25.978	25.923	27.1074	26.4977	27.2211	NA	Cell	1.64692	26.1186	2.73349	0.0331392	0.112297	-3.87989
Apip	21.0304	23.6347	23.4761	20.495	19.5069	NA	NA	Cell	-2.63961	21.6286	-2.88454	0.0331723	0.112316	-3.68658
Nptn	23.697	23.5669	23.8405	24.6352	25.1859	24.2871	NA	Cell	1.0013	24.2021	2.73166	0.0332213	0.11233	-3.88243
Pef1	21.006	22.0963	21.8757	26.6779	22.7214	23.757	NA	Cell	2.72613	23.0224	2.73075	0.0332619	0.112386	-3.88369
Abr	22.2229	22.0971	21.942	20.8148	21.5957	19.606	NA	Cell	-1.41516	21.3797	-2.72804	0.0333834	0.112714	-3.88744
Frg1	NA	23.8423	23.4393	NA	21.3318	NA	NA	Cell	-2.34763	22.8711	-3.60764	0.0335902	0.113331	-3.14899
Mis12	NA	20.8355	20.6247	NA	NA	18.434	NA	Cell	-2.2759	19.9647	-3.59486	0.0339082	0.114166	-3.15896
Pex5	19.1052	20.4929	21.1136	NA	22.0499	22.3106	NA	Cell	1.83426	21.0145	2.86611	0.0339092	0.114166	-3.70965
Stam	21.8741	25.066	24.7232	18.9655	22.3504	22.0012	NA	Cell	-2.78206	22.4967	-2.71639	0.0339115	0.114166	-3.90358
Dis3l	NA	20.7033	20.3908	NA	22.2343	21.7951	NA	Cell	1.4677	21.2809	3.11124	0.033987	0.11419	-3.49534
Itgb5	22.6182	19.8751	21.3405	20.2179	17.8668	19.529	NA	Cell	-2.07338	20.2413	-2.71463	0.0339922	0.11419	-3.90602
Naa38	24.3081	24.743	24.6635	24.209	22.1691	20.9461	NA	Cell	-2.13012	23.5065	-2.71559	0.0339481	0.11419	-3.90469
Psmb1	26.4982	26.7447	26.705	26.8473	28.9498	29.0715	NA	Cell	1.64021	27.4694	2.71399	0.0340216	0.114207	-3.90691
Hmgcs2	NA	22.8573	22.6354	NA	24.3604	24.0005	NA	Cell	1.43407	23.4634	3.10372	0.0342426	0.114866	-3.50341
Pds5a	25.8882	25.4418	25.6015	23.4736	24.7104	24.927	NA	Cell	-1.27349	25.0071	-2.70782	0.0343057	0.114994	-3.91546
Glt25d1	24.7596	24.8278	24.614	19.8819	23.4267	23.4057	NA	Cell	-2.49572	23.486	-2.70557	0.0344099	0.115099	-3.91858
Nup205	25.8947	26.1958	26.259	23.9946	25.7903	24.5838	NA	Cell	-1.32697	25.453	-2.70555	0.034411	0.115099	-3.91861
Set	28.1292	27.0117	27.483	28.6993	28.3599	28.6744	NA	Cell	1.03657	28.0596	2.70616	0.0343829	0.115099	-3.91777
Rp2	NA	24.2163	23.0896	NA	26.4426	31.1412	NA	Cell	5.13899	26.2224	3.09428	0.0345663	0.115535	-3.51353
Mlycd	NA	21.2823	21.4551	NA	22.5602	23.6841	NA	Cell	1.75346	22.2454	3.09279	0.0346178	0.115624	-3.51514
Rap1gap	20.3315	21.7997	19.8186	NA	23.1217	22.0254	NA	Cell	1.8931	21.4194	2.84492	0.0347786	0.115995	-3.73622
Slc27a4	NA	22.415	22.5441	NA	26.0091	23.9253	NA	Cell	2.48763	23.7234	3.08885	0.0347543	0.115995	-3.51937
Capzb	26.0147	26.0586	25.9234	24.5211	25.0184	25.491	NA	Cell	-0.988741	25.5045	-2.69615	0.0348504	0.116151	-3.93165
Med14	NA	20.9994	20.4859	NA	NA	18.3279	NA	Cell	-2.36546	19.9378	-3.55442	0.0349394	0.116365	-3.19071
Lclat1	NA	22.3267	22.3118	NA	21.1088	20.6263	NA	Cell	-1.4517	21.5934	-3.08264	0.0349707	0.116386	-3.52605
Aco2	28.5895	28.792	28.8058	29.5679	29.366	30.6694	NA	Cell	1.13866	29.2984	2.69194	0.0350494	0.116564	-3.9375
Cfl1	28.7499	27.7324	27.6841	26.2069	26.6466	27.3733	NA	Cell	-1.3132	27.3989	-2.69035	0.0351247	0.116731	-3.9397
Actr3	25.1838	26.2675	26.1123	27.8323	26.4284	29.5459	NA	Cell	2.08098	26.895	2.68811	0.0352311	0.116835	-3.9428
Birc5	NA	20.1939	20.3417	NA	21.6109	21.6822	NA	Cell	1.37878	20.9572	3.0764	0.0351897	0.116835	-3.53277
Ube3a	22.6103	24.2773	24.2793	24.1658	26.9413	25.9194	NA	Cell	1.9532	24.6989	2.68827	0.0352236	0.116835	-3.94259
Eif5a	27.0263	26.5932	26.8872	26.648	22.9435	24.0216	NA	Cell	-2.29781	25.6866	-2.68749	0.0352605	0.116849	-3.94366
Gpx3	22.5201	23.2306	22.9631	19.9236	22.5995	21.0423	NA	Cell	-1.71614	22.0465	-2.68641	0.035312	0.116937	-3.94516
Prkca	21.0562	21.6184	23.8986	22.4487	28.2675	27.7475	NA	Cell	3.96348	24.1728	2.68168	0.0355388	0.117604	-3.95174
Eny2	23.5372	24.0624	24.2966	22.0488	23.4475	22.8738	NA	Cell	-1.17538	23.3777	-2.67982	0.0356279	0.117814	-3.95431
Sf3b3	27.5393	28.2834	28.1674	26.4956	27.5946	26.458	NA	Cell	-1.14728	27.4231	-2.67878	0.0356781	0.117814	-3.95575
Yme1l1	24.3136	25.199	25.1991	23.67	24.1293	23.9139	NA	Cell	-0.999513	24.4042	-2.67893	0.0356711	0.117814	-3.95555
Lppr4	NA	22.9603	23.4785	NA	21.6389	21.8898	NA	Cell	-1.45501	22.4919	-3.05422	0.0359814	0.118731	-3.55671
Igf2bp3	26.5745	26.9057	26.9551	22.9641	26.241	25.1287	NA	Cell	-2.0338	25.7948	-2.67072	0.0360697	0.118938	-3.96695
Acat1	26.7542	27.5305	27.4329	26.4384	26.3443	25.966	NA	Cell	-0.989615	26.7444	-2.67013	0.0360981	0.118947	-3.96776
Lmnb1	29.7069	29.7214	29.8382	29.466	27.7736	28.1331	NA	Cell	-1.29794	29.1065	-2.66873	0.0361666	0.119068	-3.96971
Noc3l	22.4201	22.7819	23.205	19.2777	18.8655	22.7287	NA	Cell	-2.5117	21.5465	-2.66834	0.0361857	0.119068	-3.97025
Camk2d	22.1473	22.6049	22.4823	22.7043	25.1564	24.1396	NA	Cell	1.5886	23.2058	2.66569	0.0363161	0.119328	-3.97394
Ddx31	NA	21.2555	21.3594	NA	23.2407	22.4832	NA	Cell	1.55449	22.0847	3.04535	0.0363037	0.119328	-3.56631
Golt1b	NA	21.8174	22.0109	NA	19.6831	NA	NA	Cell	-2.21253	21.1705	-3.50064	0.0363727	0.119346	-3.23342
Hdac2	24.5947	25.5138	25.8271	24.6229	23.4337	23.8701	NA	Cell	-1.33633	24.6437	-2.66458	0.0363704	0.119346	-3.97547
Dbr1	NA	19.2396	19.3936	NA	NA	17.1279	NA	Cell	-2.20352	18.5871	-3.4979	0.0364478	0.119508	-3.23561
Pold2	23.4177	24.2624	24.2208	23.6344	19.9085	20.9217	NA	Cell	-2.47871	22.7276	-2.66212	0.0364917	0.119568	-3.97889
Atp2b4	21.1102	20.9161	21.9796	21.7708	22.8252	23.4449	NA	Cell	1.34499	22.0078	2.66065	0.0365647	0.119638	-3.98094
Ssfa2	20.8446	20.7726	21.1615	NA	19.9483	19.7555	NA	Cell	-1.08213	20.4965	-2.80358	0.0365469	0.119638	-3.78823
Ptpra	NA	20.9605	21.0465	NA	NA	18.8215	NA	Cell	-2.19026	20.2762	-3.49065	0.0366472	0.119824	-3.24141
Gstz1	23.1463	24.4357	24.193	22.8092	22.8431	22.801	NA	Cell	-1.10723	23.3714	-2.65279	0.036956	0.12058	-3.99185
Mpg	NA	20.9769	20.5287	NA	22.1116	22.2566	NA	Cell	1.4313	21.4685	3.02785	0.0369495	0.12058	-3.58528
Prps2	24.2022	25.5991	25.6531	20.1497	23.5772	24.0843	NA	Cell	-2.54769	23.8776	-2.65343	0.0369241	0.12058	-3.99097
Scap	NA	19.9827	19.7107	NA	21.3166	21.1326	NA	Cell	1.3779	20.5357	3.0249	0.0370594	0.120832	-3.58848
Papola	21.9813	22.9178	23.2564	17.5877	20.8871	21.8474	NA	Cell	-2.61109	21.4129	-2.64788	0.0372028	0.121215	-3.99868
Casp6	23.9917	23.2157	22.9744	22.1833	22.5173	19.7545	NA	Cell	-1.90895	22.4395	-2.64666	0.0372644	0.121331	-4.00037
Nrf1	22.3029	22.0429	22.0508	20.7256	20.5744	21.7833	NA	Cell	-1.10447	21.58	-2.64259	0.0374709	0.121871	-4.00604
Scrn2	21.8963	23.9626	23.5884	20.1974	20.507	22.6579	NA	Cell	-2.0283	22.1349	-2.64236	0.0374827	0.121871	-4.00636
Plcd1	20.6924	21.318	20.8518	20.0163	NA	19.4119	NA	Cell	-1.20502	20.4581	-2.78098	0.0375553	0.122022	-3.81675
Mrps30	23.0672	23.493	23.5577	26.9685	23.9092	25.1504	NA	Cell	1.97007	24.3577	2.64007	0.0375991	0.122079	-4.00954
Coasy	NA	22.9351	22.7047	NA	21.2827	21.5683	NA	Cell	-1.39433	22.1227	-3.0093	0.0376488	0.122155	-3.60545
Cdipt	22.1298	23.0869	23.0675	NA	20.8661	NA	NA	Cell	-1.95774	22.2876	-3.00432	0.037839	0.122573	-3.50865
Cyc1	25.5444	26.3166	26.2038	24.1793	25.6107	24.7708	NA	Cell	-1.16801	25.4376	-2.63517	0.0378504	0.122573	-4.01636
Galk1	24.3439	24.8272	24.5689	23.5004	23.2324	20.0225	NA	Cell	-2.32824	23.4159	-2.63433	0.0378931	0.122573	-4.01752
Uchl1	22.4993	23.0583	22.5455	21.7787	19.2113	NA	NA	Cell	-2.22098	21.8186	-2.77321	0.0379092	0.122573	-3.82657
Zc3h11a	22.9744	22.9469	23.2279	22.2649	21.1554	22.4203	NA	Cell	-1.10286	22.4983	-2.63473	0.0378726	0.122573	-4.01696
Atp6ap1	22.193	22.2636	21.7072	NA	NA	20.3026	NA	Cell	-1.68527	21.6166	-2.99849	0.0380633	0.122986	-3.51485
Fam105b	NA	19.7578	19.6905	NA	20.8766	21.9531	NA	Cell	1.69072	20.5695	2.99493	0.0382009	0.123345	-3.62111
Dnajb4	21.3417	21.7587	21.6144	22.3458	23.1137	NA	NA	Cell	1.16229	22.0348	2.76554	0.0382622	0.123388	-3.83628
Nsl1	18.7295	20.6848	20.9963	20.4952	23.0373	23.3519	NA	Cell	2.15793	21.2158	2.62659	0.0382937	0.123388	-4.02829
Slc12a9	NA	21.2727	21.0953	NA	18.2884	19.9227	NA	Cell	-2.07847	20.1448	-2.99272	0.0382866	0.123388	-3.62352
Fn3krp	NA	21.2774	21.2509	NA	NA	19.1151	NA	Cell	-2.14655	20.5478	-3.42659	0.0384695	0.123783	-3.29312
Pacs2	NA	19.0243	19.3349	NA	NA	21.4059	NA	Cell	2.19645	19.9217	3.42694	0.0384591	0.123783	-3.29283
Lass6	NA	20.5485	21.2087	NA	NA	18.5797	NA	Cell	-2.3623	20.1123	-3.42424	0.0385384	0.123919	-3.29503
Dhrs1	23.2696	27.1424	27.1274	NA	22.4941	23.0568	NA	Cell	-3.3184	24.6181	-2.75502	0.0387519	0.12452	-3.84959
Thap11	NA	20.9186	20.5873	NA	19.6229	18.8162	NA	Cell	-1.53342	19.9862	-2.97936	0.0388099	0.12462	-3.63812
Nudt21	25.8405	26.451	26.3288	23.8191	24.3284	25.983	NA	Cell	-1.4966	25.4585	-2.61622	0.0388371	0.124621	-4.04272
Gsr	24.5265	25.41	25.1557	27.0525	26.6236	25.4508	NA	Cell	1.34488	25.7032	2.6152	0.0388911	0.124709	-4.04414
Cpt2	25.6658	25.5787	25.6071	23.3082	25.0078	24.6884	NA	Cell	-1.28242	24.976	-2.61394	0.0389577	0.124793	-4.04589
Impa2	21.9929	22.2203	22.0299	20.3434	12.8205	NA	NA	Cell	-5.50403	19.8814	-2.75036	0.0389711	0.124793	-3.8555
Coro1c	21.9031	24.5909	24.3771	13.7032	21.5209	20.9853	NA	Cell	-4.88724	21.1801	-2.61109	0.0391091	0.124993	-4.04986
Ddah2	25.484	25.5029	25.4247	25.0552	20.9067	23.1258	NA	Cell	-2.44128	24.2499	-2.6114	0.0390924	0.124993	-4.04942
Pard6b	NA	20.9195	20.2031	NA	22.2283	24.7935	NA	Cell	2.94956	22.0361	2.97169	0.0391141	0.124993	-3.64652
Mov10	25.3346	26.4174	26.3687	25.5826	23.8351	23.864	NA	Cell	-1.61299	25.2337	-2.61032	0.0391501	0.125023	-4.05093
Noc4l	22.1648	23.0827	22.3681	22.8727	24.352	24.1006	NA	Cell	1.23654	23.1568	2.6091	0.0392153	0.125145	-4.05263
Mettl15	NA	18.7995	19.011	NA	16.7328	NA	NA	Cell	-2.1521	18.1811	-3.39903	0.0392883	0.125292	-3.3156
Ahdc1	20.3767	20.7959	21.1543	NA	NA	19.1007	NA	Cell	-1.74766	20.3569	-2.96605	0.0393391	0.125317	-3.54944
Bzw2	25.2301	25.297	25.3281	24.8138	23.9974	22.5751	NA	Cell	-1.48965	24.5403	-2.60644	0.0393571	0.125317	-4.05633
Mospd2	NA	20.5233	20.2008	NA	19.2453	18.2979	NA	Cell	-1.5905	19.5668	-2.96511	0.0393769	0.125317	-3.65372
Nt5dc2	26.4794	26.2661	26.2233	24.5467	25.841	25.3127	NA	Cell	-1.08948	25.7782	-2.60481	0.0394444	0.125446	-4.05859
Fkbp9	25.3724	25.2812	25.3156	24.942	23.9833	24.1773	NA	Cell	-0.955562	24.8453	-2.6024	0.0395745	0.125774	-4.06196
Timm8a1	NA	23.281	23.141	NA	22.0014	20.2813	NA	Cell	-2.06962	22.1762	-2.95784	0.03967	0.125991	-3.6617
Morc3	NA	20.9187	21.1865	NA	22.8977	22.2162	NA	Cell	1.50435	21.8048	2.95204	0.0399056	0.126653	-3.66807
Myh9	30.1541	29.8122	29.9101	31.421	30.5679	30.6772	NA	Cell	0.92991	30.4237	2.59376	0.0400423	0.127001	-4.07398
Sar1b	24.8716	25.4176	25.2542	24.9365	21.8717	22.7973	NA	Cell	-1.97929	24.1915	-2.59192	0.0401427	0.127233	-4.07654
Vim	30.8585	30.6328	30.77	30.2885	28.6451	29.7473	NA	Cell	-1.19349	30.157	-2.58915	0.0402949	0.127628	-4.08041
Aak1	22.3075	22.506	22.6647	21.6427	21.8671	20.4974	NA	Cell	-1.15701	21.9142	-2.58728	0.0403975	0.127705	-4.08301
Mgat2	22.586	22.7391	22.8877	22.6064	20.1194	19.8098	NA	Cell	-1.89246	21.7914	-2.58697	0.0404145	0.127705	-4.08344
Tmem201	NA	20.3947	20.5259	NA	21.5596	22.5453	NA	Cell	1.59217	21.2563	2.94009	0.0403965	0.127705	-3.68121
Ywhae	30.1926	29.7985	29.9193	29.6532	26.4297	28.0901	NA	Cell	-1.91247	29.0139	-2.58671	0.0404291	0.127705	-4.08381
Chmp7	19.4441	18.684	19.0345	20.8513	NA	NA	NA	Cell	1.72222	19.5035	2.93788	0.0404879	0.127718	-3.57964
Wdr6	20.5571	22.5336	22.2326	20.3351	18.8234	20.6562	NA	Cell	-1.83617	20.8563	-2.5859	0.0404735	0.127718	-4.08493
Eif4h	25.1262	25.2384	25.4181	24.7679	22.6674	19.9745	NA	Cell	-2.79095	23.8654	-2.58411	0.0405725	0.127898	-4.08743
Sdhb	26.1904	26.3936	26.3618	25.7662	25.237	23.7708	NA	Cell	-1.39061	25.62	-2.58093	0.0407489	0.128367	-4.09186
Mad1l1	23.8861	24.7954	24.7227	27.1174	27.8741	24.6768	NA	Cell	2.08803	25.5121	2.5783	0.0408952	0.128741	-4.09552
Htt	21.4978	23.281	23.0958	NA	20.7454	21.273	NA	Cell	-1.7239	21.9786	-2.71008	0.0409235	0.128743	-3.90662
Spen	NA	20.4018	19.8419	NA	18.317	14.512	NA	Cell	-3.70735	18.2682	-2.92377	0.0410778	0.129141	-3.6992
Scarb2	23.204	23.5445	24.2861	24.6113	24.7773	24.6105	NA	Cell	0.988123	24.1723	2.57329	0.0411755	0.129361	-4.1025
Slc35b2	NA	23.0954	23.3761	NA	22.0905	21.131	NA	Cell	-1.62499	22.4233	-2.91951	0.0412577	0.129532	-3.70389
Sgcd	NA	20.0624	20.1143	NA	18.8448	18.7182	NA	Cell	-1.30685	19.4349	-2.91713	0.0413586	0.129761	-3.70652
Dak	22.9159	23.1618	23.02	20.5624	22.9322	20.7663	NA	Cell	-1.6123	22.2265	-2.56605	0.0415841	0.130381	-4.11259
Tex10	24.5571	25.2312	25.1798	21.8456	23.0895	24.7526	NA	Cell	-1.76013	24.1093	-2.56332	0.0417394	0.13078	-4.11639
Bbs9	NA	20.9056	20.7931	NA	18.888	19.7466	NA	Cell	-1.53204	20.0833	-2.90605	0.0418325	0.130983	-3.71877
Ina	22.5342	21.3996	21.7198	23.6211	23.7823	22.263	NA	Cell	1.33763	22.5533	2.56041	0.0419055	0.131124	-4.12045
Maob	21.7656	23.0957	22.69	22.8181	24.4481	24.4089	NA	Cell	1.37462	23.2044	2.55985	0.0419378	0.131137	-4.12123
Hic1	NA	20.4054	20.74	NA	18.4109	NA	NA	Cell	-2.12966	19.8521	-3.31078	0.042062	0.131348	-3.3886
Plekha7	20.7774	21.0278	21.4966	24.298	22.986	21.488	NA	Cell	1.82339	22.0123	2.55803	0.0420423	0.131348	-4.12377
Cit	20.102	20.0054	18.0769	21.6831	NA	20.7557	NA	Cell	1.88327	20.1246	2.68434	0.0422268	0.131775	-3.93937
Raly	26.6381	26.6742	26.8628	22.6657	25.7792	25.6094	NA	Cell	-2.04027	25.7049	-2.55034	0.042486	0.132495	-4.13449
Abhd16a	21.1563	23.0336	22.8104	NA	21.0163	20.3569	NA	Cell	-1.75985	21.6747	-2.67628	0.0426445	0.132743	-3.94965
Pole3	21.5839	21.9023	21.9191	22.4994	24.833	NA	NA	Cell	1.87572	22.5475	2.67645	0.0426355	0.132743	-3.94943
Pa2g4	27.7908	27.8896	27.9473	27.2905	26.1792	27.131	NA	Cell	-1.00896	27.3714	-2.54623	0.0427254	0.132829	-4.14022
Pcdhgc3	NA	21.4557	21.3213	NA	23.4554	22.4578	NA	Cell	1.5681	22.1725	2.88445	0.0427747	0.132829	-3.7427
Pfas	24.7011	25.1065	25.0638	24.0098	24.1949	24.2575	NA	Cell	-0.803063	24.5556	-2.5456	0.0427626	0.132829	-4.14111
Pgm2	21.6825	23.5461	23.5163	25.6649	23.4109	26.2225	NA	Cell	2.18447	24.0072	2.54508	0.0427928	0.132829	-4.14183
Hnrnpk	30.0728	29.9635	30.0698	29.054	28.6843	29.6246	NA	Cell	-0.914371	29.5782	-2.5435	0.0428855	0.132851	-4.14403
Tfg	24.3295	24.9903	24.9848	25.3471	25.8286	25.7894	NA	Cell	0.886839	25.2116	2.54407	0.0428519	0.132851	-4.14323
Tmem87a	24.3395	23.5179	24.4547	21.3034	23.1135	23.2724	NA	Cell	-1.54098	23.3336	-2.5437	0.0428738	0.132851	-4.14376
Obsl1	24.279	24.8435	25.0448	22.6169	24.532	22.663	NA	Cell	-1.45183	23.9965	-2.54193	0.0429775	0.133047	-4.14622
Apoa1bp	22.7773	24.6865	24.3052	24.368	26.629	25.7864	NA	Cell	1.67145	24.7587	2.54076	0.0430465	0.133084	-4.14786
Ptprn2	19.8226	22.3707	21.8322	NA	23.3974	23.7739	NA	Cell	2.09794	22.2394	2.66878	0.0430371	0.133084	-3.95921
Gnaq	24.142	23.6013	23.7832	20.1718	NA	23.0144	NA	Cell	-2.27218	22.9425	-2.66787	0.0430849	0.133114	-3.96037
Purb	24.0979	23.8766	23.9792	19.7683	23.1256	22.6604	NA	Cell	-2.13314	22.918	-2.53928	0.0431336	0.133176	-4.14992
Ddx49	20.6749	22.6447	22.3114	NA	20.4938	14.2163	NA	Cell	-4.63742	20.0682	-2.66388	0.0432954	0.133449	-3.96545
Kdm2a	NA	21.6458	21.7907	NA	22.8776	24.6416	NA	Cell	2.04135	22.7389	2.87368	0.0432532	0.133449	-3.75466
Krr1	NA	20.2096	20.4792	NA	21.7584	24.5221	NA	Cell	2.79584	21.7423	2.87246	0.0433079	0.133449	-3.75602
Pdcd6ip	25.8545	26.8288	26.8842	25.6942	23.4614	25.3574	NA	Cell	-1.68488	25.6801	-2.53557	0.0433528	0.133499	-4.15509
Idh3a	25.9999	26.4049	26.3752	25.1328	25.8278	25.1557	NA	Cell	-0.887906	25.8161	-2.52815	0.0437955	0.134773	-4.16544
Ttll12	24.9756	24.2118	24.0088	23.251	23.1898	23.7344	NA	Cell	-1.00699	23.8952	-2.52601	0.0439237	0.135078	-4.16842
Gipc1	22.8592	23.5258	23.6677	24.3016	24.0317	24.4685	NA	Cell	0.916351	23.8091	2.5236	0.0440689	0.135346	-4.17178
Sfxn1	25.7459	25.6436	25.5679	22.3835	24.9578	24.5569	NA	Cell	-1.6864	24.8093	-2.52385	0.0440538	0.135346	-4.17143
Bid	NA	21.0329	20.801	NA	NA	18.8328	NA	Cell	-2.06189	20.2222	-3.24953	0.0441322	0.135451	-3.44017
Gle1	22.1231	20.6271	21.5073	NA	16.4425	20.3754	NA	Cell	-2.94262	20.2151	-2.64554	0.044279	0.135812	-3.98889
Fmnl1	NA	21.175	20.7575	NA	19.8617	19.2672	NA	Cell	-1.40177	20.2654	-2.84856	0.0443942	0.136076	-3.78263
Arg1	23.0565	21.8985	21.8126	18.5064	21.5379	20.5092	NA	Cell	-2.07137	21.2202	-2.51671	0.0444872	0.136271	-4.18141
Polr2g	NA	22.2719	22.1013	NA	23.6303	23.3387	NA	Cell	1.29789	22.8356	2.84487	0.044565	0.136365	-3.78675
Smad4	20.2281	18.8695	20.9607	NA	NA	17.5655	NA	Cell	-2.63464	19.4059	-2.84462	0.0445763	0.136365	-3.68057
Akr7a2	24.5031	24.3952	24.2948	24.2668	21.7755	22.4722	NA	Cell	-1.55954	23.6179	-2.5143	0.0446338	0.136412	-4.18476
Dhrs7b	22.9027	23.5359	23.3496	22.9999	17.9347	20.1319	NA	Cell	-2.90724	21.8091	-2.51404	0.0446502	0.136412	-4.18513
Med23	22.4379	22.1936	22.2053	NA	20.5436	21.5719	NA	Cell	-1.2059	21.7905	-2.63727	0.0447303	0.136565	-3.99946
Rbm26	22.9786	23.2543	23.4805	23.3876	25.3791	24.9988	NA	Cell	1.35073	23.9131	2.51226	0.0447589	0.136565	-4.18761
Med25	NA	24.0413	24.5948	NA	27.0101	25.5454	NA	Cell	1.95967	25.2979	2.83677	0.0449417	0.137033	-3.79579
Blzf1	NA	21.4015	20.3881	NA	18.9761	19.4764	NA	Cell	-1.66854	20.0605	-2.83243	0.0451451	0.137563	-3.80064
Hm13	25.1512	24.3705	24.5668	26.4696	25.2421	25.5283	NA	Cell	1.05053	25.2214	2.50377	0.0452828	0.137892	-4.19945
Ncstn	25.8053	25.2225	24.9133	23.9492	24.5014	24.5268	NA	Cell	-0.987872	24.8197	-2.50268	0.0453504	0.138008	-4.20097
Pdlim1	22.8592	23.5075	23.1557	21.4554	21.741	22.8853	NA	Cell	-1.1469	22.6007	-2.50213	0.0453852	0.138023	-4.20175
Myo1d	NA	22.5151	22.2714	NA	20.9502	21.2211	NA	Cell	-1.30762	21.7394	-2.82334	0.045575	0.138501	-3.81082
Uqcrh	22.6133	21.4567	21.8192	19.9484	20.9948	21.1564	NA	Cell	-1.26319	21.3315	-2.49865	0.0456018	0.138501	-4.2066
Impdh2	26.4407	26.686	26.7988	25.921	24.946	26.0432	NA	Cell	-1.00512	26.1393	-2.49746	0.0456767	0.138611	-4.20827
Ipo8	21.9187	21.1929	21.2395	20.1543	20.1366	20.9875	NA	Cell	-1.02425	20.9383	-2.49697	0.0457071	0.138611	-4.20895
Trmu	21.7762	22.9078	22.3462	21.2162	20.1082	21.6843	NA	Cell	-1.34047	21.6731	-2.49665	0.0457272	0.138611	-4.20939
Mbnl2	NA	22.3973	22.5581	NA	20.6623	16.6839	NA	Cell	-3.80463	20.5754	-2.81843	0.045809	0.138768	-3.81632
Psph	21.6111	21.3094	21.6993	23.1539	21.9794	22.4345	NA	Cell	0.982642	22.0313	2.4941	0.0458879	0.138844	-4.21296
Rpl27	28.134	28.4618	28.6714	26.748	27.8419	27.7078	NA	Cell	-0.989841	27.9275	-2.494	0.0458938	0.138844	-4.21309
Papss1	22.6508	23.3019	23.4512	22.7102	30.402	30.8157	NA	Cell	4.84131	25.5553	2.49256	0.0459849	0.139013	-4.21511
Paxip1	NA	20.1793	19.8705	NA	17.5633	18.9033	NA	Cell	-1.79162	19.1291	-2.81425	0.0460092	0.139013	-3.821
Fnbp1l	21.8858	22.336	22.8147	25.6716	23.3564	23.2929	NA	Cell	1.76141	23.2262	2.49013	0.0461385	0.139186	-4.2185
Nasp	28.0432	26.9656	27.1122	26.5494	26.1785	26.4762	NA	Cell	-0.972274	26.8875	-2.48985	0.0461561	0.139186	-4.21889
Unc45a	21.7747	23.3181	23.0472	NA	20.8247	21.6432	NA	Cell	-1.56945	22.1216	-2.61235	0.0461209	0.139186	-4.03136
Dync1i2	26.0211	25.8162	25.7317	24.9531	24.4914	25.4053	NA	Cell	-0.906358	25.4031	-2.48858	0.0462366	0.139338	-4.22066
Mfsd10	22.2827	22.2809	22.2879	21.5706	18.9639	14.1535	NA	Cell	-4.05449	20.2566	-2.48529	0.046446	0.139879	-4.22525
Ass1	23.6296	28.3237	28.3922	28.6785	30.1697	30.3908	NA	Cell	2.96449	28.2641	2.48404	0.0465253	0.139937	-4.22699
Ghrl	24.1404	22.8946	23.0733	23.8543	25.5276	25.1555	NA	Cell	1.47636	24.1076	2.4844	0.0465024	0.139937	-4.22649
Abat	23.2072	22.663	22.434	21.642	22.0634	21.9051	NA	Cell	-0.897872	22.3191	-2.48194	0.04666	0.140243	-4.22993
Nomo1	25.5635	25.9846	25.8761	27.0973	27.4303	26.101	NA	Cell	1.06812	26.3421	2.48151	0.0466873	0.140243	-4.23052
Capns1	22.2099	23.7808	23.7358	20.5238	22.679	21.8978	NA	Cell	-1.54196	22.4712	-2.47968	0.0468053	0.140416	-4.23309
Ube2n	26.9424	27.8574	27.4122	26.2138	26.8938	26.3079	NA	Cell	-0.932118	26.9379	-2.47989	0.0467914	0.140416	-4.23279
Rnf181	NA	18.8002	19.2425	NA	16.9699	17.9847	NA	Cell	-1.54402	18.2493	-2.79689	0.046852	0.140465	-3.84048
Ywhab	27.4563	26.4363	26.3935	26.2734	25.6031	24.276	NA	Cell	-1.37786	26.0731	-2.47676	0.0469932	0.140798	-4.23716
Pgm3	NA	20.9542	21.0933	NA	22.9876	22.0689	NA	Cell	1.50448	21.776	2.79093	0.0471456	0.141164	-3.84719
Psmc4	26.248	27.4222	27.7891	26.2824	25.3416	26.0188	NA	Cell	-1.27216	26.517	-2.47344	0.0472081	0.14126	-4.2418
Kif1b	NA	19.0578	20.0017	NA	21.7212	20.85	NA	Cell	1.75587	20.4077	2.78744	0.0473185	0.1415	-3.85111
9030624J02Rik	20.8968	20.9197	20.593	21.2355	21.8992	21.8778	NA	Cell	0.867628	21.237	2.47119	0.0473543	0.141516	-4.24494
Plekhg3	19.9449	21.0503	20.4945	17.5639	18.8617	20.1898	NA	Cell	-1.62477	19.6842	-2.46891	0.0475028	0.141868	-4.24812
Eif4b	20.138	20.5656	21.7763	15.7713	18.8211	20.2727	NA	Cell	-2.53822	19.5575	-2.46786	0.0475716	0.141983	-4.24959
Lyar	23.8261	22.9963	23.4462	22.2811	20.2568	22.8732	NA	Cell	-1.61917	22.6133	-2.46353	0.0478557	0.142739	-4.25564
Acad11	20.8917	21.9347	21.2519	NA	19.4474	20.5183	NA	Cell	-1.42151	20.8088	-2.57957	0.0480218	0.142992	-4.07339
Mgea5	21.7373	22.7362	22.8392	21.8826	21.0226	20.7614	NA	Cell	-1.21536	21.8299	-2.46128	0.0480035	0.142992	-4.25877
Pcbd1	23.2089	24.58	24.3082	23.5533	22.1584	21.028	NA	Cell	-1.78583	23.1395	-2.46085	0.0480325	0.142992	-4.25938
Asf1b	NA	19.2898	19.5696	NA	20.5373	20.8911	NA	Cell	1.28448	20.0719	2.76865	0.0482614	0.14346	-3.87228
Cpsf6	23.7208	25.1228	24.832	22.8783	23.6351	23.7947	NA	Cell	-1.12249	23.9973	-2.457	0.0482872	0.14346	-4.26475
Fundc1	20.907	21.2588	21.9386	20.0687	20.3227	20.8347	NA	Cell	-0.959438	20.8884	-2.45519	0.048408	0.14346	-4.26729
Hspe1	29.3014	29.498	29.4413	30.8571	30.1177	29.9731	NA	Cell	0.902374	29.8648	2.455	0.0484203	0.14346	-4.26755
Mrps17	NA	22.7575	22.5718	NA	21.6048	19.9568	NA	Cell	-1.8838	21.7227	-2.76522	0.0484361	0.14346	-3.87616
Myg1	24.0034	24.2823	24.0742	22.0048	23.8428	22.9202	NA	Cell	-1.19736	23.5213	-2.45622	0.0483394	0.14346	-4.26585
Psmc5	26.5462	26.9937	26.9995	26.4347	25.6496	24.4911	NA	Cell	-1.32135	26.1858	-2.45495	0.0484237	0.14346	-4.26761
Thoc5	22.1179	23.9262	23.834	16.7153	20.8735	22.5927	NA	Cell	-3.23216	21.6766	-2.455	0.0484203	0.14346	-4.26755
Rbm27	22.0128	21.3015	21.3062	20.6739	NA	15.9196	NA	Cell	-3.26633	20.2428	-2.56808	0.0487086	0.144175	-4.08816
Rbbp9	NA	22.6345	22.4159	NA	23.6407	23.9818	NA	Cell	1.28605	23.1682	2.75438	0.048992	0.144922	-3.8884
Man1a2	21.1335	23.27	23.4957	19.5931	22.2708	19.5875	NA	Cell	-2.14924	21.5584	-2.44354	0.04919	0.145415	-4.28355
Haus3	NA	20.4961	20.5233	NA	18.9848	15.5564	NA	Cell	-3.23907	18.8902	-2.74965	0.0492372	0.145462	-3.89375
Ero1l	23.643	23.4128	23.5935	24.1288	25.034	27.7225	NA	Cell	2.07864	24.5891	2.44061	0.049389	0.145818	-4.28764
Decr2	21.0327	21.7012	20.976	NA	22.5469	22.1348	NA	Cell	1.08464	21.6783	2.55392	0.0495695	0.146258	-4.10636
Gmps	26.3055	26.4217	26.3493	26.0835	22.9243	24.643	NA	Cell	-1.80854	25.4545	-2.43691	0.0496413	0.146377	-4.29281
Mettl1	21.2015	21.7609	21.6473	20.1078	21.3207	19.7666	NA	Cell	-1.13819	20.9675	-2.43633	0.0496809	0.146401	-4.29362
Igf2bp1	27.0363	27.5374	27.5318	27.5755	28.7696	28.9612	NA	Cell	1.06693	27.9019	2.43567	0.0497264	0.146404	-4.29454
Tubb6	24.3336	25.3451	24.7103	24.6585	28.2208	28.3629	NA	Cell	2.28444	25.9385	2.4354	0.0497445	0.146404	-4.29491
Pfkfb4	NA	21.751	22.8654	NA	20.3465	21.0567	NA	Cell	-1.60663	21.5049	-2.73926	0.04978	0.146416	-3.90551
Hdhd2	21.902	21.9591	22.3281	20.5432	NA	NA	NA	Cell	-1.48895	21.6831	-2.73748	0.0498738	0.146599	-3.79833
Gpr124	NA	21.5673	21.7161	NA	22.9019	25.5585	NA	Cell	2.58852	22.936	2.73268	0.0501278	0.147252	-3.91297
Kiaa1324	NA	25.5009	25.6347	NA	26.5545	27.6389	NA	Cell	1.52886	26.3322	2.73122	0.0502048	0.147386	-3.91462
Nmt1	24.5148	25.1673	25.1946	24.2144	24.288	23.4803	NA	Cell	-0.964664	24.4766	-2.42689	0.0503314	0.147664	-4.3068
Cryzl1	21.2282	21.6376	20.2588	17.5904	NA	20.0365	NA	Cell	-2.1708	20.1503	-2.53797	0.0505594	0.14824	-4.1269
Klc4	22.1295	22.6779	22.7296	26.9073	24.9891	22.72	NA	Cell	2.35981	23.6922	2.42086	0.0507518	0.14871	-4.31523
Noc2l	22.8144	23.0523	23.4007	22.1254	22.0678	19.1294	NA	Cell	-1.9816	22.0983	-2.41949	0.0508474	0.148897	-4.31714
Tbcd	22.8655	22.5915	22.4373	20.6955	21.8738	16.6672	NA	Cell	-2.88594	21.1885	-2.41671	0.0510427	0.149374	-4.32102
H1f0	25.5391	25.8463	25.9173	28.1006	26.9846	26.1174	NA	Cell	1.29997	26.4176	2.41547	0.0511302	0.149537	-4.32275
Slc25a17	20.7671	21.7243	21.4812	18.5636	21.3791	18.3531	NA	Cell	-1.89225	20.3781	-2.41359	0.0512629	0.149831	-4.32538
Sbno1	20.3476	20.8515	20.889	NA	19.2034	NA	NA	Cell	-1.52248	20.3229	-2.70968	0.0513643	0.150033	-3.8292
Ppa2	23.799	24.5761	24.6462	23.6227	23.3399	23.3617	NA	Cell	-0.899005	23.8909	-2.41014	0.0515078	0.150263	-4.3302
Whsc2	23.3333	22.6294	22.6756	22.4239	21.6611	19.6972	NA	Cell	-1.61871	22.0701	-2.41055	0.0514784	0.150263	-4.32963
Tarsl2	NA	20.5357	19.6035	NA	21.3367	22.1414	NA	Cell	1.66948	20.9043	2.70628	0.0515497	0.150291	-3.94295
Rps12	28.2359	27.1102	27.4329	26.8991	25.7117	26.8464	NA	Cell	-1.10726	27.0394	-2.4056	0.0518311	0.151017	-4.33654
Cd276	22.7755	23.4306	23.4414	19.2495	22.8012	21.6976	NA	Cell	-1.96638	22.2326	-2.40227	0.0520702	0.151619	-4.34119
Psmd8	24.7076	26.7046	26.7183	24.16	25.2747	24.3215	NA	Cell	-1.4581	25.3145	-2.40078	0.0521774	0.151741	-4.34327
Ptpn23	22.8693	24.1419	24.3403	NA	25.3317	25.1712	NA	Cell	1.3798	24.3709	2.51291	0.0521576	0.151741	-4.15919
Polr3b	NA	20.7283	21.2318	NA	NA	19.0098	NA	Cell	-2.0186	20.3233	-3.03989	0.0522516	0.151862	-3.62226
Emg1	22.2374	22.764	22.6143	NA	21.0914	NA	NA	Cell	-1.4905	22.1768	-2.69275	0.0522965	0.151898	-3.84804
Ncoa5	22.7878	22.7233	23.3171	NA	21.6608	22.1774	NA	Cell	-1.03849	22.5333	-2.50713	0.0525338	0.152492	-4.16665
Rad51	NA	20.6224	21.6005	NA	23.4466	22.381	NA	Cell	1.80234	22.0126	2.687	0.052618	0.152621	-3.96492
Trappc5	NA	22.6306	22.2114	NA	23.6849	23.6534	NA	Cell	1.2482	23.0451	2.68654	0.0526438	0.152621	-3.96544
Mpc2	22.8586	18.8425	19.7495	23.4053	22.7735	22.0964	NA	Cell	2.27482	21.621	2.39358	0.0526987	0.152685	-4.35333
Plcg1	21.4568	21.2761	21.6635	20.144	21.0064	20.6336	NA	Cell	-0.870837	21.0301	-2.3924	0.0527847	0.152839	-4.35498
Rfc4	25.5328	25.1076	25.1814	25.0024	23.7521	21.9543	NA	Cell	-1.70433	24.4218	-2.39111	0.0528791	0.152929	-4.35678
Taf6	NA	22.175	22.1063	NA	18.6794	20.9842	NA	Cell	-2.30883	20.9862	-2.68231	0.0528814	0.152929	-3.97027
Dusp12	NA	20.2742	20.3345	NA	18.4032	NA	NA	Cell	-1.89531	19.6706	-3.02336	0.0529679	0.153084	-3.63699
Zcchc3	22.5946	23.6625	23.6911	19.1051	22.7188	21.9623	NA	Cell	-2.054	22.2891	-2.38937	0.0530062	0.1531	-4.35921
Dync1li1	24.9743	25.4072	25.9076	25.2717	28.4565	28.9002	NA	Cell	2.1131	26.4862	2.38878	0.0530491	0.153129	-4.36003
Cxx1b	NA	20.8044	20.1165	NA	19.4493	17.9269	NA	Cell	-1.77241	19.5743	-2.67366	0.0533716	0.153572	-3.98015
Eif5b	23.4698	24.5211	24.8764	24.4927	25.9661	26.6161	NA	Cell	1.40251	24.9904	2.384	0.0534005	0.153572	-4.3667
Fis1	24.8265	24.498	24.7517	25.0868	19.5416	18.9827	NA	Cell	-3.48835	22.9479	-2.38575	0.0532715	0.153572	-4.36426
Hspd1	30.4111	30.2011	30.2777	29.493	29.7058	29.4859	NA	Cell	-0.735109	29.9291	-2.38532	0.0533038	0.153572	-4.36487
Llgl2	20.2055	22.6079	22.385	NA	23.723	23.8826	NA	Cell	1.92337	22.5608	2.49482	0.053345	0.153572	-4.18253
Mbnl3	NA	19.2351	19.4243	NA	13.0765	17.5967	NA	Cell	-3.99306	17.3332	-2.67411	0.0533461	0.153572	-3.97963
Aldh7a1	25.8909	27.3983	27.2477	26.4607	24.4103	24.4517	NA	Cell	-1.73808	25.9766	-2.38352	0.0534362	0.153579	-4.36738
Snx17	20.7805	21.6671	21.5729	NA	20.687	19.1464	NA	Cell	-1.47717	20.7708	-2.49217	0.053522	0.153731	-4.18596
2010300C02Rik	NA	16.7406	17.3635	NA	18.1745	18.5639	NA	Cell	1.31712	17.7106	2.66873	0.0536533	0.153918	-3.98578
Farp1	25.2989	25.1934	25.2591	25.1244	29.216	28.3327	NA	Cell	2.30722	26.4041	2.38101	0.0536221	0.153918	-4.37089
5730455P16Rik	NA	19.777	18.8373	NA	18.2191	16.2922	NA	Cell	-2.05152	18.2814	-2.66649	0.0537819	0.153972	-3.98834
Dnttip2	25.454	26.6493	26.5329	24.4426	24.6222	25.9023	NA	Cell	-1.22304	25.6006	-2.37914	0.0537608	0.153972	-4.3735
Ndufa4	24.873	26.472	26.3867	24.1449	25.133	24.8671	NA	Cell	-1.1956	25.3128	-2.37934	0.0537457	0.153972	-4.37321
Tmx1	23.9412	23.7229	24.2775	23.8647	22.149	21.4381	NA	Cell	-1.4966	23.2322	-2.37856	0.0538041	0.153972	-4.37431
Nsf	25.4954	26.4598	26.1528	25.9152	30.4566	33.7153	NA	Cell	3.99302	28.0325	2.37702	0.0539186	0.154205	-4.37646
Smarca2	21.3288	21.418	22.336	20.3079	21.279	19.7853	NA	Cell	-1.23689	21.0758	-2.37499	0.0540704	0.154544	-4.3793
Akt1	23.2034	22.3641	22.7642	21.996	22.1404	21.5027	NA	Cell	-0.897502	22.3285	-2.36877	0.0545371	0.155782	-4.38798
Ddx5	28.1807	28.9058	28.9272	25.9264	28.08	27.8596	NA	Cell	-1.38251	27.9799	-2.36303	0.0549717	0.156543	-4.39599
Hibch	23.5361	24.4045	24.4322	20.8467	23.5255	23.1496	NA	Cell	-1.617	23.3158	-2.36465	0.0548488	0.156543	-4.39373
Hook1	20.124	22.5456	22.3914	22.6082	23.6567	23.4295	NA	Cell	1.54446	22.4593	2.36383	0.0549114	0.156543	-4.39488
Ighg2c	21.9286	24.194	23.9697	24.3348	25.2116	24.8654	NA	Cell	1.43986	24.084	2.36337	0.0549464	0.156543	-4.39552
Rab5b	21.8939	22.4903	22.797	22.1207	19.8721	17.4603	NA	Cell	-2.57607	21.1057	-2.36416	0.0548865	0.156543	-4.39442
Armc8	NA	22.649	22.6814	NA	NA	20.8041	NA	Cell	-1.86418	22.0448	-2.97559	0.0551071	0.156764	-3.67985
Coro1a	20.0514	22.3462	22.5416	19.7617	20.2458	20.315	NA	Cell	-1.5389	20.8769	-2.36042	0.0551713	0.156764	-4.39965
Gnpda1	23.1707	23.5375	22.7457	23.1515	25.9994	25.4295	NA	Cell	1.70882	24.0057	2.36025	0.0551838	0.156764	-4.39988
Slk	23.4079	22.7992	23.2585	24.1573	24.2731	23.6192	NA	Cell	0.861318	23.5858	2.36048	0.0551667	0.156764	-4.39956
Cep170	20.8804	21.325	20.8837	21.0013	18.6733	18.7945	NA	Cell	-1.54001	20.2597	-2.35976	0.0552214	0.156775	-4.40056
Aldh16a1	22.0541	23.2317	22.7996	20.4931	22.047	21.9553	NA	Cell	-1.19662	22.0968	-2.35816	0.055344	0.156856	-4.4028
Cadps	NA	19.4136	19.5706	NA	20.4403	21.2414	NA	Cell	1.34874	20.1665	2.64059	0.0552942	0.156856	-4.01802
Fgfr1op	19.5716	20.0559	20.6193	22.8151	NA	20.8828	NA	Cell	1.76413	20.789	2.46524	0.0553509	0.156856	-4.22075
Tdp1	21.3924	20.6187	21.94	16.9607	21.2567	18.2004	NA	Cell	-2.51108	20.0615	-2.35701	0.0554321	0.15699	-4.40441
Cnot3	21.7179	22.4381	22.4656	NA	23.6019	23.0945	NA	Cell	1.09403	22.6636	2.4615	0.0556104	0.157304	-4.22559
Ngdn	21.44	20.8083	21.0713	NA	NA	19.6075	NA	Cell	-1.49223	20.7318	-2.63558	0.055592	0.157304	-3.91204
Itpr3	25.1633	27.1545	26.8422	24.4575	25.5791	25.1664	NA	Cell	-1.31903	25.7272	-2.3508	0.0559107	0.158057	-4.41308
Psmd14	24.6355	26.67	26.6503	NA	23.5087	24.8708	NA	Cell	-1.92515	25.2671	-2.45549	0.0560304	0.158278	-4.23337
Rad21	24.7714	24.7164	24.7977	22.6991	23.8948	24.3626	NA	Cell	-1.10963	24.207	-2.34891	0.0560568	0.158278	-4.41571
Ikbkap	25.5674	26.024	26.0185	24.4173	25.5813	24.8203	NA	Cell	-0.930342	25.4048	-2.3482	0.0561122	0.158283	-4.4167
Nucb2	24.5472	24.3479	24.3929	27.4658	25.0083	25.3116	NA	Cell	1.49926	25.179	2.34802	0.0561264	0.158283	-4.41696
Pdzd11	NA	21.7965	21.8919	NA	NA	20.0026	NA	Cell	-1.85077	21.2304	-2.94839	0.0563735	0.158883	-3.70447
Prex1	NA	17.3602	17.1513	NA	15.1512	16.2899	NA	Cell	-1.53521	16.4881	-2.62159	0.0564342	0.158958	-4.03984
Apoa1	27.0046	27.1175	27.3739	27.7764	28.067	27.8709	NA	Cell	0.739437	27.535	2.34206	0.0565912	0.159296	-4.42527
Rpl5	27.5692	27.8796	28.0833	27.5746	26.5815	26.0197	NA	Cell	-1.11876	27.2846	-2.34126	0.0566545	0.159296	-4.4264
Timm17b	22.9076	23.5475	23.3515	NA	22.7056	21.1319	NA	Cell	-1.38483	22.7288	-2.4466	0.0566569	0.159296	-4.24486
Kiaa1429	23.1326	22.9388	23.2677	22.1547	19.6722	22.5005	NA	Cell	-1.67056	22.2777	-2.33998	0.0567544	0.159474	-4.42818
Rpl8	27.028	26.4976	27.037	26.8472	24.8004	24.0165	NA	Cell	-1.63281	26.0378	-2.33915	0.0568197	0.159561	-4.42933
Sptbn1	28.6532	29.0039	29.1027	30.4748	30.7952	29.0689	NA	Cell	1.19299	29.5165	2.33655	0.0570254	0.160042	-4.43297
Spg20	22.9461	22.9741	22.8165	23.6435	14.5705	15.4749	NA	Cell	-5.0159	20.4042	-2.33384	0.0572394	0.160546	-4.43675
Cdk5rap2	NA	19.9249	19.3511	NA	21.1916	20.6767	NA	Cell	1.29616	20.2861	2.60771	0.0572841	0.160575	-4.05582
Crkl	23.6714	24.2723	24.1022	22.8771	22.8401	23.6689	NA	Cell	-0.886597	23.572	-2.33188	0.0573953	0.16079	-4.43949
Csnk2b	22.9112	23.3248	23.129	22.987	28.4646	26.3027	NA	Cell	2.79645	24.5199	2.33046	0.0575084	0.16101	-4.44147
Adrbk1	NA	20.69	20.7902	NA	23.4111	21.724	NA	Cell	1.82744	21.6538	2.60218	0.0576267	0.161147	-4.06219
Cog7	NA	22.5282	22.2626	NA	25.8454	23.4632	NA	Cell	2.25889	23.5248	2.60228	0.0576205	0.161147	-4.06208
Dpp3	26.0642	26.1335	25.9066	25.8589	29.3209	29.0221	NA	Cell	2.03253	27.051	2.3278	0.0577207	0.161313	-4.44518
Phldb1	21.0896	22.943	23.1226	NA	23.6411	25.2144	NA	Cell	1.91831	23.2022	2.43101	0.0577751	0.161368	-4.26506
Rbm19	23.0502	23.8529	23.4477	22.0028	23.0892	22.4925	NA	Cell	-0.922125	22.9892	-2.32581	0.0578801	0.161564	-4.44796
Hectd1	22.3768	23.5229	23.4474	24.7287	27.8477	23.6859	NA	Cell	2.30502	24.2682	2.32436	0.0579971	0.161794	-4.44999
Chd3	22.3407	22.456	22.4594	22.3312	20.7989	20.5398	NA	Cell	-1.19537	21.821	-2.32219	0.0581716	0.162087	-4.45301
Tbk1	21.2488	20.8668	21.08	21.6487	22.9793	21.7312	NA	Cell	1.05452	21.5925	2.32261	0.0581377	0.162087	-4.45243
Trappc11	19.2914	21.4028	21.0817	18.2429	19.2315	19.9181	NA	Cell	-1.46117	19.8614	-2.31994	0.0583536	0.162491	-4.45616
Prkaa1	23.3161	22.2777	22.0585	21.4009	20.2582	22.0545	NA	Cell	-1.31287	21.8943	-2.31432	0.05881	0.163572	-4.464
Inadl	NA	20.804	21.0315	NA	18.2104	19.9702	NA	Cell	-1.82743	20.004	-2.58276	0.0588487	0.163582	-4.08461
Mgst3	20.6748	18.9677	20.6491	20.2331	24.2018	23.2787	NA	Cell	2.47399	21.3342	2.31288	0.0589274	0.163703	-4.466
Srek1	22.2914	25.0985	23.8143	20.161	23.3806	21.6078	NA	Cell	-2.01826	22.7256	-2.31039	0.0591318	0.164075	-4.46949
Txndc5	26.6036	26.9667	26.8414	25.6438	26.3257	26.1105	NA	Cell	-0.777212	26.4153	-2.31057	0.0591166	0.164075	-4.46923
Kiaa1033	22.6559	22.7444	23.157	20.3343	20.8614	22.9091	NA	Cell	-1.48416	22.1104	-2.30946	0.0592081	0.164189	-4.47078
Gopc	NA	21.8752	22.5825	NA	20.2268	21.2719	NA	Cell	-1.47953	21.4891	-2.57339	0.0594485	0.164739	-4.09544
Spats2l	22.852	21.9283	22.0577	21.3673	21.6422	21.1804	NA	Cell	-0.882666	21.838	-2.30576	0.0595126	0.164739	-4.47594
Jmjd1c	NA	17.711	16.6755	NA	16.0578	15.4032	NA	Cell	-1.46276	16.4619	-2.57124	0.0595874	0.164848	-4.09793
Cma1	22.066	25.958	25.1004	28.1513	26.0949	26.5079	NA	Cell	2.5432	25.6464	2.30356	0.0596946	0.164949	-4.47901
Fam21	20.5692	21.9881	22.541	20.0976	20.2353	21.0197	NA	Cell	-1.24856	21.0752	-2.30364	0.0596879	0.164949	-4.4789
Fnta	21.8855	22.9689	23.0123	21.2647	21.9307	21.8177	NA	Cell	-0.951187	22.1466	-2.30093	0.0599128	0.165453	-4.48268
Tbl3	23.2877	24.1789	24.2107	22.3664	23.3478	23.1266	NA	Cell	-0.94548	23.4197	-2.29906	0.0600692	0.165787	-4.4853
Zkscan1	19.8189	19.7857	19.4419	17.5704	19.5118	14.8416	NA	Cell	-2.37427	18.495	-2.29845	0.0601197	0.165828	-4.48614
Ptbp2	23.7494	23.4554	23.4708	23.5755	21.6337	20.4391	NA	Cell	-1.6758	22.7206	-2.29573	0.0603475	0.166358	-4.48994
Gprasp1	21.507	19.3794	19.5328	17.8382	NA	NA	NA	Cell	-2.56413	19.5643	-2.55693	0.0605199	0.166537	-4.00089
Rfc3	23.4215	24.0761	24.6107	23.4632	22.0765	23.0828	NA	Cell	-1.16196	23.4551	-2.2938	0.060509	0.166537	-4.49263
Slc27a3	NA	21.3122	21.1701	NA	NA	19.4262	NA	Cell	-1.80134	20.6362	-2.86192	0.0606436	0.166779	-3.78369
Evl	19.6415	22.0071	22.1702	18.0456	14.7139	20.8938	NA	Cell	-3.38848	19.5787	-2.29138	0.0607127	0.16687	-4.496
Dennd4c	NA	19.0501	18.5061	NA	20.3571	19.7604	NA	Cell	1.28061	19.4184	2.5524	0.0608182	0.166926	-4.11975
Irf2bp1	NA	22.6011	22.5076	NA	23.605	25.9219	NA	Cell	2.20914	23.6589	2.55227	0.0608268	0.166926	-4.1199
Stxbp1	23.333	22.9748	22.9568	23.8793	23.5188	24.3117	NA	Cell	0.815066	23.4957	2.28948	0.0608737	0.166926	-4.49866
Ugt2b35	NA	21.1782	21.0136	NA	NA	19.2786	NA	Cell	-1.80152	20.4902	-2.85743	0.0608764	0.166926	-3.78785
Ccdc102a	21.6382	22.4665	22.4632	NA	21.5354	20.4796	NA	Cell	-1.23473	21.7166	-2.38731	0.0610366	0.16705	-4.32171
Hmbs	19.739	22.5325	22.3546	NA	20.1012	18.8918	NA	Cell	-2.21865	20.7238	-2.38829	0.0609611	0.16705	-4.32044
Ilf2	27.1563	27.5644	27.5659	27.1346	25.7462	26.3532	NA	Cell	-1.01751	26.9201	-2.28794	0.0610035	0.16705	-4.5008
Kbp	21.0305	24.322	24.7699	17.2025	21.7298	22.0171	NA	Cell	-3.05766	21.8453	-2.28722	0.0610652	0.16705	-4.50182
Hddc2	21.2937	20.6343	20.5024	20.3035	17.777	NA	NA	Cell	-1.79944	20.1022	-2.38576	0.0611558	0.167192	-4.32372
Rab3d	22.4855	26.1279	26.0826	25.8001	29.0888	27.2422	NA	Cell	2.47842	26.1379	2.28576	0.061189	0.167192	-4.50385
Ctr9	21.7453	22.9832	23.2158	19.7111	22.4141	21.0926	NA	Cell	-1.57549	21.8604	-2.28429	0.0613138	0.167404	-4.50589
Pop1	20.6653	22.3116	22.3255	19.3591	NA	NA	NA	Cell	-2.1967	21.1654	-2.54457	0.0613384	0.167404	-4.01493
Twf2	23.4099	23.681	23.5028	22.9604	20.1629	NA	NA	Cell	-1.9723	22.7434	-2.38038	0.0615715	0.167942	-4.3307
Efhd2	25.5604	26.2806	26.6349	25.8545	24.3989	24.5609	NA	Cell	-1.22053	25.5484	-2.27788	0.0618622	0.168537	-4.51483
Rpl27a	27.1211	27.198	27.1183	26.9097	26.1071	25.219	NA	Cell	-1.06722	26.6122	-2.27798	0.0618543	0.168537	-4.5147
Ash2l	23.3207	23.4666	23.7108	20.9381	22.7842	22.9624	NA	Cell	-1.27115	22.8638	-2.27654	0.0619779	0.168557	-4.5167
Nutf2	23.9507	23.7822	22.7852	23.3048	21.6952	21.8961	NA	Cell	-1.20735	22.9024	-2.27666	0.0619672	0.168557	-4.51653
Pgap1	23.2859	24.1764	23.7103	23.3109	22.3948	20.2898	NA	Cell	-1.72565	22.8614	-2.27734	0.0619091	0.168557	-4.51559
Cdk6	21.8187	21.402	20.815	NA	19.7537	NA	NA	Cell	-1.60243	20.9473	-2.53034	0.0622963	0.169028	-4.03112
Cisd1	23.274	23.6847	24.0651	22.2544	22.9453	23.1994	NA	Cell	-0.874888	23.2372	-2.27312	0.0622734	0.169028	-4.52148
Lamtor5	22.7781	23.6014	23.4718	18.0298	22.4553	22.0763	NA	Cell	-2.42994	22.0688	-2.27364	0.0622286	0.169028	-4.52075
Usp1	NA	19.224	17.5433	NA	20.1163	23.3608	NA	Cell	3.35488	20.0611	2.53145	0.0622211	0.169028	-4.14408
Dffa	NA	20.9866	21.2289	NA	19.2876	NA	NA	Cell	-1.79695	20.501	-2.82866	0.062392	0.169189	-3.81456
Dnajb11	24.5402	24.6776	25.1545	28.1569	25.326	25.8692	NA	Cell	1.65991	25.6207	2.26725	0.0627831	0.17015	-4.52965
Bag1	23.7967	24.9538	24.7045	23.5223	23.4013	23.7829	NA	Cell	-0.916155	24.0269	-2.2649	0.0629888	0.170517	-4.53293
Htra2	23.0577	23.7242	23.8449	23.8164	25.6446	24.596	NA	Cell	1.14339	24.114	2.26403	0.063065	0.170517	-4.53414
Nol6	23.6439	24.2081	24.4921	23.0127	22.9145	23.7623	NA	Cell	-0.884854	23.6723	-2.26408	0.063061	0.170517	-4.53408
Ptprg	NA	20.1859	20.6295	NA	NA	18.6033	NA	Cell	-1.84701	19.8062	-2.81652	0.0630458	0.170517	-3.82589
Sugp1	21.8039	20.9997	21.3934	20.6027	20.0272	20.9414	NA	Cell	-0.875216	20.9614	-2.26282	0.0631719	0.170707	-4.53584
Mrpl49	22.9057	23.1336	23.0688	NA	22.4145	21.7812	NA	Cell	-0.950658	22.6608	-2.35732	0.0633891	0.171095	-4.36065
Rcn1	25.8404	25.7505	26.0393	24.7038	25.2197	25.4021	NA	Cell	-0.768168	25.4926	-2.26046	0.0633794	0.171095	-4.53913
Lsm2	24.6942	24.4921	24.2272	22.9408	24.0321	23.7105	NA	Cell	-0.910049	24.0162	-2.25955	0.0634593	0.171186	-4.54039
Ndrg3	21.8896	21.6687	21.6248	23.0841	NA	NA	NA	Cell	1.32537	22.0668	2.51211	0.0635486	0.171327	-4.05191
Ces1d	22.2911	23.6167	23.4926	24.154	31.8526	25.3993	NA	Cell	4.00186	25.1344	2.25735	0.0636542	0.171446	-4.54346
Fmr1	NA	24.5093	24.7633	NA	22.5648	23.7763	NA	Cell	-1.46571	23.9034	-2.50937	0.0637398	0.171446	-4.16978
Ppp2r1b	23.2298	23.9538	23.6858	20.2488	23.5771	21.912	NA	Cell	-1.71054	22.7679	-2.25646	0.0637333	0.171446	-4.5447
Slc4a1ap	21.1449	22.322	22.3426	NA	18.0907	21.3235	NA	Cell	-2.3054	21.0447	-2.35336	0.063707	0.171446	-4.3658
Adpgk	25.0884	25.0114	24.9595	29.0098	30.3907	24.5971	NA	Cell	2.97942	26.5095	2.25587	0.0637854	0.171469	-4.54552
Acot7	22.6834	22.8819	22.6968	21.7977	22.3218	21.9761	NA	Cell	-0.722173	22.3929	-2.25531	0.0638345	0.171478	-4.54629
Esrp1	23.2965	23.4769	23.2677	23.8686	23.9395	24.6334	NA	Cell	0.800142	23.7471	2.25462	0.0638962	0.171478	-4.54726
Slc25a5	29.3065	29.3899	29.4512	29.374	27.386	27.6316	NA	Cell	-1.25202	28.7565	-2.25459	0.063899	0.171478	-4.5473
Arl2bp	NA	20.097	20.3158	NA	21.2715	21.4044	NA	Cell	1.13162	20.7722	2.50522	0.0640297	0.1717	-4.17461
Armcx3	22.1704	21.8591	21.4507	20.441	NA	NA	NA	Cell	-1.45175	21.4803	-2.50427	0.0640962	0.1717	-4.06086
Selh	22.6982	23.0688	22.9409	21.6613	22.5006	19.2222	NA	Cell	-1.77459	22.0153	-2.252	0.0641295	0.1717	-4.55091
Sh3pxd2b	21.9128	21.0884	21.0977	21.3672	15.7665	18.7505	NA	Cell	-2.73828	19.9972	-2.25274	0.0640633	0.1717	-4.54988
Ddx21	26.172	26.4903	26.4404	24.2823	25.3475	26.1434	NA	Cell	-1.10986	25.8127	-2.24787	0.0644988	0.172491	-4.55666
Timm22	NA	21.905	21.2514	NA	19.7194	NA	NA	Cell	-1.92155	20.9586	-2.79021	0.0644912	0.172491	-3.85052
Araf	NA	23.2637	23.6501	NA	22.5245	21.3137	NA	Cell	-1.53783	22.688	-2.49607	0.0646742	0.172492	-4.18528
Atp2c1	NA	20.107	19.14	NA	18.6596	17.4423	NA	Cell	-1.57256	18.8372	-2.49672	0.0646286	0.172492	-4.18453
H2afv	28.6059	28.4582	28.6289	28.3759	25.7978	27.3182	NA	Cell	-1.40033	27.8641	-2.24581	0.0646845	0.172492	-4.55954
Myo18a	24.9407	24.8318	25.046	24.6917	27.8484	28.1011	NA	Cell	1.94089	25.9099	2.24703	0.0645747	0.172492	-4.55784
Slc9a3r1	24.48	24.0506	24.2385	25.4756	24.6495	25.006	NA	Cell	0.787347	24.65	2.24716	0.0645625	0.172492	-4.55765
Zadh2	23.9421	24.4158	24.4604	23.7262	23.6014	22.9884	NA	Cell	-0.834136	23.8557	-2.2443	0.0648201	0.172755	-4.56164
Ctbp2	24.8165	25.0121	24.8359	21.5631	24.2817	24.0664	NA	Cell	-1.58442	24.0959	-2.24272	0.0649636	0.172939	-4.56385
Itgav	23.6758	24.8777	24.6934	24.2721	27.4897	26.7006	NA	Cell	1.73851	25.2849	2.24282	0.0649545	0.172939	-4.56371
Rprd1a	21.3616	23.4596	23.8746	NA	20.9976	21.4343	NA	Cell	-1.83021	22.2255	-2.33578	0.0651394	0.173252	-4.38865
Stag2	24.6497	24.72	24.4982	24.4046	23.5293	22.2077	NA	Cell	-1.24208	24.0016	-2.2406	0.0651555	0.173252	-4.5668
Itga9	NA	20.9977	21.1442	NA	19.3087	NA	NA	Cell	-1.74817	20.4835	-2.77659	0.0652551	0.173418	-3.86332
Aup1	NA	21.1716	21.1398	NA	23.1076	22.0107	NA	Cell	1.40343	21.8574	2.48612	0.065384	0.173568	-4.1969
Rbm39	24.8419	25.4592	25.5685	25.6786	26.5382	26.1756	NA	Cell	0.840936	25.7103	2.23806	0.0653863	0.173568	-4.57034
Spcs2	25.2593	25.6128	25.6015	25.0736	24.7358	23.7931	NA	Cell	-0.957039	25.0127	-2.23683	0.0654977	0.173765	-4.57204
Utp3	22.1676	21.9655	22.2432	20.0542	22.1953	19.3058	NA	Cell	-1.60699	21.3219	-2.23591	0.0655822	0.17389	-4.57333
Plin3	25.224	25.6277	25.1888	23.5451	24.5288	24.9883	NA	Cell	-0.992816	24.8505	-2.23548	0.0656211	0.173894	-4.57392
Dmd	21.6209	21.9988	22.1673	21.9352	17.6719	19.6125	NA	Cell	-2.18916	20.8344	-2.23345	0.0658069	0.174287	-4.57675
Eif3c	27.175	26.8079	26.9375	26.4475	26.4088	25.5362	NA	Cell	-0.842642	26.5521	-2.23191	0.0659482	0.17444	-4.5789
Lrpap1	25.8441	25.9201	26.0517	25.4173	30.4148	30.4301	NA	Cell	2.81546	27.3463	2.23183	0.0659559	0.17444	-4.57901
Nln	23.2907	24.4594	24.4652	26.1167	24.6037	25.2239	NA	Cell	1.243	24.6933	2.2316	0.0659768	0.17444	-4.57933
Znf512	22.4129	22.7203	23.2402	21.1288	20.5122	22.7939	NA	Cell	-1.31283	22.1347	-2.23009	0.0661155	0.174707	-4.58143
Rpl10a	29.0682	29.1388	29.098	29.2367	26.9006	26.3408	NA	Cell	-1.60896	28.2972	-2.22957	0.0661641	0.174736	-4.58216
Dpysl2	27.7439	28.2239	28.1253	27.3979	27.3155	27.2289	NA	Cell	-0.716901	27.6726	-2.22875	0.0662393	0.174802	-4.5833
Thy1	22.0508	22.5241	23.7436	23.2059	25.1924	24.1161	NA	Cell	1.39865	23.4721	2.22848	0.066264	0.174802	-4.58367
Gip	NA	18.5878	18.9111	NA	19.5936	21.039	NA	Cell	1.56685	19.5329	2.47214	0.0663957	0.174951	-4.21325
Snx1	25.4502	25.8721	25.6525	25.2535	29.5888	29.1231	NA	Cell	2.33018	26.8234	2.2272	0.0663821	0.174951	-4.58545
Commd8	21.5276	21.0014	21.1897	NA	19.8292	NA	NA	Cell	-1.36459	20.887	-2.47064	0.0665053	0.175141	-4.09936
Pak1ip1	20.9426	21.1974	20.9103	20.4269	20.4189	20.1083	NA	Cell	-0.69874	20.6674	-2.22368	0.0667091	0.175578	-4.59036
Cox6c	25.4948	24.6315	24.868	25.6101	26.3564	25.7323	NA	Cell	0.901514	25.4488	2.2212	0.06694	0.175987	-4.59381
Hmgcs1	22.6718	22.6884	22.9951	24.0798	NA	NA	NA	Cell	1.31646	23.1088	2.46522	0.0669032	0.175987	-4.10559
Abcb10	21.6409	23.8213	24.3381	NA	25.791	24.9839	NA	Cell	1.96455	24.115	2.3122	0.0671142	0.176164	-4.41932
Cetn3	21.1773	22.1622	22.0969	NA	19.2909	21.2604	NA	Cell	-1.59743	21.1975	-2.31212	0.0671209	0.176164	-4.41942
Puf60	26.3206	26.9796	27.1698	25.4071	25.8101	26.5242	NA	Cell	-0.909535	26.3686	-2.21986	0.0670646	0.176164	-4.59567
Eef2	29.8423	29.7554	29.6971	30.8538	30.3012	30.3153	NA	Cell	0.72518	30.1275	2.21775	0.0672622	0.176435	-4.59861
Nolc1	24.7168	23.1469	23.9036	23.7482	28.778	27.6746	NA	Cell	2.81117	25.328	2.21604	0.0674226	0.176657	-4.60099
Dnajc19	NA	22.1137	21.3041	NA	NA	19.6604	NA	Cell	-1.97072	21.0261	-2.73792	0.0674863	0.176725	-3.89989
Uxs1	NA	22.0216	22.1548	NA	21.1913	20.5673	NA	Cell	-1.20891	21.4838	-2.45321	0.0677941	0.177431	-4.23542
Mrpl13	22.2692	23.8098	23.8848	NA	26.8734	24.1931	NA	Cell	2.11098	24.2061	2.30326	0.0678798	0.177467	-4.43095
Mrps34	21.0551	23.6144	23.3524	NA	18.8784	21.7117	NA	Cell	-2.53436	21.7224	-2.3032	0.0678842	0.177467	-4.43101
Aco1	25.9779	25.7943	25.6545	26.9103	26.5056	26.2249	NA	Cell	0.738043	26.1779	2.20702	0.0682752	0.178144	-4.61354
Hnrnpa1	NA	28.5192	28.7394	NA	27.1874	27.7317	NA	Cell	-1.1698	28.0444	-2.44624	0.0683173	0.178144	-4.24359
Mrpl9	22.6404	23.5386	23.4647	23.6619	17.6287	18.6918	NA	Cell	-3.22044	21.6043	-2.20675	0.0683013	0.178144	-4.61392
Mrps26	23.3465	22.9826	22.8383	16.7568	22.3732	NA	NA	Cell	-3.51171	21.6595	-2.298	0.0683345	0.178144	-4.43779
Ncaph2	19.8818	21.6287	21.666	19.7842	20.2255	19.5796	NA	Cell	-1.19572	20.461	-2.20709	0.0682689	0.178144	-4.61344
Rasa1	21.2788	22.2322	22.3544	22.1442	24.2121	23.2044	NA	Cell	1.23177	22.571	2.20591	0.0683814	0.178167	-4.61509
Mrpl44	23.1043	23.3034	23.4375	18.5547	23.3692	20.885	NA	Cell	-2.34543	22.109	-2.20547	0.0684233	0.178176	-4.6157
Ccdc6	22.6406	21.8657	22.2336	20.4439	22.1059	20.6353	NA	Cell	-1.18494	21.6542	-2.2041	0.0685545	0.178318	-4.61761
Hist1h2bb	33.6911	32.6438	32.7179	32.8841	31.5993	31.2467	NA	Cell	-1.10758	32.4638	-2.20441	0.0685247	0.178318	-4.61717
Mat1a	NA	23.225	22.6991	NA	25.5237	23.8098	NA	Cell	1.70472	23.8144	2.44083	0.0687264	0.178666	-4.24994
UncharacterizedproteinC19orf21homologOS=MusmusculusPE=2SV=1	NA	19.1653	19.2009	NA	20.3376	23.7781	NA	Cell	2.87473	20.6205	2.4403	0.0687665	0.17867	-4.25056
Scaper	NA	20.0948	20.4307	NA	18.4848	NA	NA	Cell	-1.7457	19.6701	-2.71327	0.0689573	0.179066	-3.92334
Wdr33	22.1409	22.2959	22.7594	21.7957	17.4008	21.0598	NA	Cell	-2.31327	21.2421	-2.19768	0.0691707	0.17952	-4.62653
Gtf2e2	NA	21.8608	22.6108	NA	20.794	21.196	NA	Cell	-1.24081	21.6154	-2.43389	0.0692555	0.17954	-4.25809
Wars2	NA	22.1444	21.7317	NA	21.0688	19.0359	NA	Cell	-1.8857	20.9952	-2.43435	0.0692203	0.17954	-4.25755
Eif2ak3	NA	20.3502	20.8014	NA	21.4355	22.257	NA	Cell	1.27049	21.211	2.43249	0.0693632	0.179719	-4.25974
Cdkn1c	25.0544	29.3164	29.3817	25.3933	25.6406	25.5419	NA	Cell	-2.39224	26.7214	-2.19364	0.0695612	0.180132	-4.63215
Rasip1	22.0297	23.3961	23.5566	20.3742	23.0562	20.4444	NA	Cell	-1.70257	22.1428	-2.19323	0.0696015	0.180136	-4.63272
Arhgef1	23.5674	24.4529	24.5967	21.4991	20.2198	24.4372	NA	Cell	-2.1536	23.1289	-2.19123	0.069796	0.180417	-4.6355
Naa35	21.8392	22.2945	22.4846	21.3538	21.268	21.7429	NA	Cell	-0.751173	21.8305	-2.19159	0.069761	0.180417	-4.63501
Use1	NA	21.5466	22.3598	NA	19.9304	NA	NA	Cell	-1.94479	21.2789	-2.69902	0.0698262	0.180417	-3.93697
Poldip3	23.5897	24.6791	24.5019	19.722	23.8121	22.9687	NA	Cell	-2.08929	23.2122	-2.18964	0.0699506	0.180587	-4.63771
Saal1	21.4005	23.164	23.0951	NA	21.7472	20.185	NA	Cell	-1.69777	21.9183	-2.27938	0.0699698	0.180587	-4.46202
Ttc1	21.9316	23.4226	22.5157	20.734	21.0912	22.3435	NA	Cell	-1.2337	22.0064	-2.18871	0.0700418	0.180673	-4.63901
Esd	25.8539	25.7507	25.6768	27.1826	25.9639	26.7472	NA	Cell	0.870797	26.1959	2.18798	0.0701132	0.180757	-4.64002
Bckdk	20.8397	21.1336	20.9681	NA	21.5518	22.4728	NA	Cell	1.01835	21.3932	2.27726	0.0701593	0.180776	-4.46479
Lancl2	22.4107	22.5083	22.7621	22.2806	21.2678	21.6256	NA	Cell	-0.835697	22.1425	-2.18677	0.0702317	0.180862	-4.64171
Echdc2	23.2522	22.675	22.7468	19.9805	23.0659	20.3516	NA	Cell	-1.75863	22.012	-2.18499	0.0704059	0.18121	-4.64417
Ncaph	24.3063	23.9429	24.1789	24.1037	22.6885	22.545	NA	Cell	-1.03032	23.6275	-2.18455	0.0704494	0.181222	-4.64479
Ldlr	NA	21.5374	22.2947	NA	NA	20.0844	NA	Cell	-1.90434	21.3055	-2.68679	0.0705822	0.181464	-3.94868
Znf326	24.508	23.544	23.9425	14.3483	22.4806	21.9868	NA	Cell	-4.39298	21.8017	-2.18264	0.0706367	0.181504	-4.64743
Hk2	24.6359	25.0239	24.858	23.2022	24.4694	24.1717	NA	Cell	-0.891481	24.3935	-2.1801	0.0708879	0.182049	-4.65097
Tmbim6	23.4519	22.1729	22.6011	20.9251	22.6139	19.8059	NA	Cell	-1.62702	21.9284	-2.17949	0.0709481	0.182103	-4.65182
Cacybp	25.9017	25.0083	24.5755	23.839	24.9136	22.252	NA	Cell	-1.49362	24.415	-2.17551	0.0713437	0.182917	-4.65735
Ufsp2	22.5682	22.5759	21.9924	20.9359	22.2122	21.1603	NA	Cell	-0.942676	21.9075	-2.17232	0.0716614	0.18363	-4.66177
Plgrkt	NA	23.4187	23.1813	NA	22.3949	21.9619	NA	Cell	-1.12161	22.7392	-2.39586	0.0722377	0.185005	-4.30284
Emc4	22.2983	23.3378	23.0536	NA	22.4345	18.6635	NA	Cell	-2.40504	21.9575	-2.25132	0.0725144	0.185509	-4.49855
Pla2g6	NA	18.7675	19.1408	NA	NA	20.7098	NA	Cell	1.7198	19.5393	2.65675	0.0724816	0.185509	-3.97758
Isyna1	24.0807	25.2609	25.0994	22.9669	24.5975	23.602	NA	Cell	-1.09155	24.2679	-2.16298	0.0726028	0.185532	-4.67476
Mcm2	27.3881	28.0113	27.847	27.1811	26.3639	27.148	NA	Cell	-0.851138	27.3232	-2.16336	0.0725638	0.185532	-4.67422
Cep97	NA	23.1931	23.8266	NA	30.1814	25.0861	NA	Cell	4.1239	25.5718	2.38791	0.072879	0.185943	-4.31222
Psmd4	NA	25.6242	25.5835	NA	24.3857	24.6525	NA	Cell	-1.08468	25.0615	-2.38798	0.0728734	0.185943	-4.31214
Sec13	23.3204	23.6636	23.7428	23.6881	20.8795	21.5135	NA	Cell	-1.5486	22.8013	-2.16021	0.0728837	0.185943	-4.67859
Anks1a	20.0978	19.9655	19.6117	20.0289	16.1914	17.793	NA	Cell	-1.88726	18.948	-2.15966	0.0729397	0.185984	-4.67936
Akr1c12	NA	20.8285	20.5526	NA	19.2625	19.7849	NA	Cell	-1.16684	20.1071	-2.3851	0.0731073	0.18631	-4.31553
Ccm2	NA	21.2158	20.4996	NA	22.6336	21.7279	NA	Cell	1.32306	21.5192	2.38435	0.0731679	0.186362	-4.31641
Grpel1	24.9535	25.6522	25.737	24.84	24.8223	23.8939	NA	Cell	-0.928836	24.9831	-2.15465	0.0734521	0.186984	-4.68632
Dopey2	NA	19.3228	19.4757	NA	21.0476	NA	NA	Cell	1.66307	19.9487	2.6402	0.0735548	0.187143	-3.99358
Snrpb	26.2011	26.3521	26.2703	24.7266	26.2913	24.575	NA	Cell	-1.07687	25.7361	-2.15314	0.0736072	0.187174	-4.68841
Sar1a	23.6163	23.4413	23.2425	23.5112	21.8097	20.7191	NA	Cell	-1.42006	22.7233	-2.1476	0.0741791	0.188525	-4.6961
Ephx1	NA	22.97	22.9315	NA	24.1964	23.8722	NA	Cell	1.0835	23.4925	2.37106	0.0742599	0.188627	-4.33211
Samhd1	25.3831	24.3041	24.6465	24.2576	23.4972	24.0168	NA	Cell	-0.854078	24.3509	-2.14623	0.0743204	0.188678	-4.69799
Paf1	22.7091	23.5257	23.9175	23.3193	25.4033	25.2947	NA	Cell	1.28835	24.0283	2.14335	0.0746209	0.189235	-4.70199
Mri1	NA	24.4992	24.8046	NA	23.8052	22.2157	NA	Cell	-1.6414	23.8312	-2.36526	0.0747412	0.189437	-4.33896
Psmc2	26.9694	27.1241	27.2502	25.397	26.4356	26.7819	NA	Cell	-0.909713	26.6597	-2.14177	0.074785	0.189445	-4.70418
Itprip	NA	20.4994	20.3108	NA	17.7612	19.5662	NA	Cell	-1.74148	19.5344	-2.36132	0.0750713	0.190066	-4.34363
Map3k7	16.8818	20.6582	20.3812	19.9657	21.5828	24.0689	NA	Cell	2.56536	20.5898	2.13783	0.0751979	0.190283	-4.70964
Ankrd13a	NA	20.9304	20.4943	NA	19.0421	NA	NA	Cell	-1.71213	20.1556	-2.61465	0.0752495	0.190311	-4.01837
Kct2	NA	21.3468	21.1571	NA	20.4666	18.7636	NA	Cell	-1.63685	20.4335	-2.35732	0.0754072	0.190399	-4.34836
Pdrg1	NA	16.9026	18.5748	NA	15.0601	NA	NA	Cell	-2.51806	16.8458	-2.61262	0.0753867	0.190399	-4.02036
Tbl2	23.2993	26.1937	26.7521	20.7031	22.6721	25.279	NA	Cell	-2.53026	24.1499	-2.13597	0.075394	0.190399	-4.71222
Ccdc124	21.0005	21.697	22.3161	20.138	NA	20.9169	NA	Cell	-1.14127	21.2137	-2.21927	0.0755424	0.19049	-4.54031
Ddx17	28.758	28.6647	28.7406	26.0037	28.727	27.2222	NA	Cell	-1.40345	28.0194	-2.1345	0.0755486	0.19049	-4.71425
Mecr	22.8904	23.3203	23.3898	27.792	22.8808	26.1369	NA	Cell	2.40307	24.4017	2.13397	0.075605	0.19049	-4.71499
Pfn1	27.7498	27.7383	27.57	26.8468	27.0276	27.1853	NA	Cell	-0.666138	27.3529	-2.13362	0.0756414	0.19049	-4.71547
Smarce1	25.0491	26.1384	26.1115	23.5372	25.159	25.2033	NA	Cell	-1.13316	25.1998	-2.13356	0.0756479	0.19049	-4.71556
Epb41l3	19.38	19.9436	19.797	NA	20.3298	21.1415	NA	Cell	0.997402	20.1184	2.21422	0.0760318	0.19125	-4.5469
Ppp4r1	22.1699	27.9602	22.9512	17.8337	23.4061	21.1912	NA	Cell	-3.5501	22.5854	-2.1303	0.0759935	0.19125	-4.72008
Trim24	21.9257	22.3174	22.5228	20.7452	21.9332	21.5141	NA	Cell	-0.857795	21.8264	-2.12938	0.076091	0.191296	-4.72135
Pak2	24.1498	24.9274	25.0765	24.0694	23.4663	24.0591	NA	Cell	-0.852959	24.2914	-2.12882	0.0761511	0.191344	-4.72213
Kif5b	26.2127	26.7561	26.6072	26.2185	25.573	25.2901	NA	Cell	-0.831469	26.1096	-2.12795	0.0762436	0.191472	-4.72333
Gtpbp4	24.8079	24.824	24.886	24.6301	23.9276	23.424	NA	Cell	-0.845432	24.4166	-2.12734	0.0763086	0.191532	-4.72418
Rbm15	NA	20.6454	21.0381	NA	21.814	22.0485	NA	Cell	1.08951	21.3865	2.34378	0.0765578	0.192054	-4.36439
Gsta4	21.8675	21.9336	21.9174	NA	23.2615	22.43	NA	Cell	0.93587	22.282	2.20789	0.0766492	0.19218	-4.55514
Ado	20.5762	21.3045	21.6428	21.3414	22.7521	22.3988	NA	Cell	0.989615	21.6693	2.1218	0.0769025	0.192504	-4.73186
Mettl16	22.1575	21.9111	21.9659	20.895	18.2052	21.6684	NA	Cell	-1.75533	21.1339	-2.12183	0.0768985	0.192504	-4.73181
Rnf20	23.3856	24.3356	24.2706	20.9126	22.7461	23.8613	NA	Cell	-1.49061	23.2519	-2.12213	0.0768661	0.192504	-4.73139
Ascc1	NA	20.0083	20.2293	NA	21.4879	20.9937	NA	Cell	1.12199	20.6798	2.32775	0.0779449	0.194486	-4.38338
Hnrnpr	26.7276	27.8693	28.0618	26.2806	27.0967	26.3837	NA	Cell	-0.965889	27.0699	-2.11345	0.077805	0.194486	-4.74342
Myl9	24.7337	23.4384	23.408	22.6649	23.4984	20.6039	NA	Cell	-1.6043	23.0579	-2.11323	0.0778286	0.194486	-4.74372
Prpsap1	24.8136	24.4495	24.4162	24.4111	26.9176	26.6829	NA	Cell	1.44408	25.2818	2.11252	0.0779059	0.194486	-4.7447
Srpk1	22.5508	23.2298	23.5923	22.0579	19.6814	22.7187	NA	Cell	-1.6383	22.3051	-2.11238	0.0779212	0.194486	-4.7449
Tomm34	25.0376	24.5181	24.5117	24.4548	23.7495	23.4726	NA	Cell	-0.79684	24.2907	-2.11295	0.0778591	0.194486	-4.74411
Becn1	NA	21.1919	20.6951	NA	21.8059	22.8127	NA	Cell	1.36581	21.6264	2.32515	0.0781725	0.194702	-4.38646
Cecr5	19.6718	21.7886	21.6445	NA	NA	23.4774	NA	Cell	2.32538	21.6456	2.32434	0.0782435	0.194702	-4.26849
Dhx30	24.5466	25.3167	25.221	22.8616	24.5343	24.4788	NA	Cell	-1.06986	24.4932	-2.10793	0.0784075	0.194702	-4.75105
Kif15	22.7775	24.1314	24.221	23.2756	26.682	27.3336	NA	Cell	2.05382	24.7368	2.10905	0.0782854	0.194702	-4.74951
Lgals3bp	21.1128	22.8294	23.0317	22.791	24.5866	23.5416	NA	Cell	1.31506	22.9822	2.10887	0.0783043	0.194702	-4.74975
Man2b2	20.5893	20.9646	21.3267	22.2414	NA	NA	NA	Cell	1.35241	21.2805	2.32263	0.0783944	0.194702	-4.27049
Ndufa9	25.8804	26.1904	26.112	25.307	25.4829	22.5815	NA	Cell	-1.60382	25.259	-2.10818	0.0783808	0.194702	-4.75072
Pcx	24.2522	25.1611	25.2292	25.2155	25.7393	26.5353	NA	Cell	0.949202	25.3554	2.10942	0.0782442	0.194702	-4.74899
Tet3	NA	17.2904	19.1	NA	15.4217	NA	NA	Cell	-2.59967	17.2707	-2.57312	0.078108	0.194702	-4.05896
Fut11	23.4477	21.4695	21.8614	27.0518	22.4815	23.9103	NA	Cell	2.22171	23.3704	2.10703	0.0785069	0.194844	-4.75231
Ints10	22.7217	23.1558	23.1564	17.0455	21.173	22.7524	NA	Cell	-2.68768	21.6675	-2.10635	0.0785813	0.194925	-4.75324
Dsp	25.2748	25.3623	25.3487	25.8151	25.8385	26.4606	NA	Cell	0.709488	25.6833	2.10451	0.0787837	0.195251	-4.75579
ptplad1	23.6105	22.9929	23.4109	23.6171	24.6319	24.35	NA	Cell	0.861563	23.7689	2.1044	0.0787964	0.195251	-4.75595
Afg3l1	20.5412	21.4608	21.2244	NA	18.1461	20.6428	NA	Cell	-1.73229	20.4031	-2.18433	0.078996	0.195389	-4.58583
Pfdn2	24.9383	25.3877	25.344	24.3182	24.9574	24.0662	NA	Cell	-0.776057	24.8353	-2.10237	0.07902	0.195389	-4.75875
Rap1gap2	22.9328	24.1146	23.9335	20.6316	23.0689	23.0261	NA	Cell	-1.41812	22.9512	-2.10249	0.0790062	0.195389	-4.75858
Raver1	24.1802	24.2153	24.1601	23.4035	23.9346	22.7925	NA	Cell	-0.808323	23.781	-2.1029	0.0789619	0.195389	-4.75802
Zfc3h1	NA	20.3189	20.1494	NA	21.5621	21.0837	NA	Cell	1.08881	20.7785	2.31403	0.0791547	0.195618	-4.39966
Th1l	23.1883	22.7428	22.6961	19.8236	22.7224	21.565	NA	Cell	-1.50537	22.123	-2.10008	0.0792737	0.195808	-4.76192
Crabp1	NA	22.488	22.2478	NA	21.3381	17.6251	NA	Cell	-2.88628	20.9248	-2.31068	0.0794531	0.196043	-4.40364
Ndufa10	25.6857	25.8969	25.9407	25.7988	22.9213	24.4457	NA	Cell	-1.45249	25.1149	-2.09767	0.079541	0.196156	-4.76525
Zmynd11	20.7964	21.0958	20.9702	18.2622	NA	20.5722	NA	Cell	-1.52335	20.3393	-2.17836	0.0796031	0.196205	-4.59362
Kdelc1	23.3617	25.6255	26.3307	23.7447	22.9917	23.8164	NA	Cell	-1.58838	24.3118	-2.09491	0.0798487	0.196681	-4.76907
Pdcd11	24.4816	24.939	25.2368	23.2673	24.3633	24.3986	NA	Cell	-0.876042	24.4478	-2.09463	0.0798806	0.196681	-4.76946
Mapk1	26.4375	26.5059	26.3511	26.1622	25.3111	25.5987	NA	Cell	-0.740847	26.0611	-2.09424	0.0799233	0.196682	-4.76999
Ppp1r7	24.7228	24.43	24.4643	22.4518	24.301	23.6396	NA	Cell	-1.07492	24.0016	-2.09355	0.0800004	0.196768	-4.77094
Cdh1	25.8447	26.0636	26.2635	25.8989	28.5098	27.8038	NA	Cell	1.3469	26.7307	2.09251	0.0801172	0.196873	-4.77238
Uqcc	21.4257	22.7952	22.0456	NA	20.5729	NA	NA	Cell	-1.65162	21.7099	-2.30317	0.0801276	0.196873	-4.29317
Timm44	25.291	26.1257	26.1182	23.7238	25.4843	25.1369	NA	Cell	-1.06329	25.3133	-2.09178	0.0801996	0.196946	-4.7734
Piezo1	17.7054	18.4865	18.9505	17.0895	25.19	29.0909	NA	Cell	5.4093	21.0855	2.08988	0.0804132	0.197247	-4.77603
Smarcb1	24.1926	24.4466	24.885	21.8668	24.1067	23.7961	NA	Cell	-1.25152	23.8823	-2.09001	0.080398	0.197247	-4.77584
Syngr2	NA	20.4986	20.8276	NA	17.0841	19.8149	NA	Cell	-2.21365	19.5563	-2.29944	0.0804641	0.197247	-4.41699
Mrpl14	NA	21.8173	21.5369	NA	23.3237	NA	NA	Cell	1.61969	22.226	2.53766	0.080653	0.197538	-4.09386
Ube2l3	26.1205	25.2553	25.4492	27.2422	26.1038	26.1508	NA	Cell	0.890584	26.0536	2.08699	0.080739	0.197645	-4.78002
Armcx4	20.4566	21.0774	20.8862	20.3439	17.47	NA	NA	Cell	-1.89214	20.0468	-2.16396	0.081087	0.198249	-4.61238
Galm	21.5362	22.4459	22.7979	27.8486	23.7565	22.939	NA	Cell	2.58804	23.554	2.08438	0.0810337	0.198249	-4.78362
Mak16	22.2196	20.8621	21.1305	21.1132	25.2939	24.7559	NA	Cell	2.31695	22.5625	2.08368	0.0811134	0.198249	-4.78459
Nme4	23.0427	24.5169	24.9873	16.8855	22.3227	23.7029	NA	Cell	-3.21196	22.5763	-2.08167	0.0813419	0.198703	-4.78737
Ola1	25.5036	25.6868	24.95	24.6042	24.8932	24.4874	NA	Cell	-0.718491	25.0209	-2.0811	0.0814069	0.198758	-4.78816
Gm20459	NA	21.9396	22.3618	NA	24.3793	22.9626	NA	Cell	1.52029	22.9108	2.28638	0.0816572	0.19916	-4.43253
Rpl30	25.7251	26.1353	25.7989	23.8927	25.9272	24.5528	NA	Cell	-1.09554	25.3387	-2.07753	0.0818149	0.19944	-4.79309
Etnk1	NA	25.9027	27.1397	NA	24.8316	25.4619	NA	Cell	-1.37442	25.834	-2.28201	0.0820609	0.199935	-4.43773
Abcg2	NA	21.7486	21.5393	NA	20.0703	NA	NA	Cell	-1.59372	21.1194	-2.5177	0.0821298	0.199964	-4.11361
Isca2	NA	22.8268	22.6706	NA	21.3518	21.9229	NA	Cell	-1.1113	22.193	-2.28095	0.0821586	0.199964	-4.43899
A2mp	25.365	20.9195	21.6814	25.6899	24.0901	24.7194	NA	Cell	2.17782	23.7442	2.07271	0.0823676	0.200367	-4.79973
Eps15	25.5943	24.1306	24.2909	26.6412	25.3035	25.3095	NA	Cell	1.07948	25.2117	2.07234	0.0824106	0.200367	-4.80025
Rragc	23.1884	22.7705	22.6686	22.5618	21.4541	22.1754	NA	Cell	-0.812062	22.4698	-2.07128	0.0825326	0.200559	-4.80171
UPF0568proteinC14orf166homologOS=MusmusculusPE=2SV=1	25.7364	26.4245	26.2181	24.8039	23.3709	26.0462	NA	Cell	-1.38596	25.4333	-2.0696	0.0827276	0.200928	-4.80403
Lztfl1	22.4581	24.1496	24.3282	22.2422	23.0832	22.0678	NA	Cell	-1.18087	23.0549	-2.06918	0.0827766	0.200943	-4.80462
Psmb5	27.0786	27.1524	27.1639	28.0422	27.2969	29.2374	NA	Cell	1.06051	27.6619	2.06797	0.0829161	0.201071	-4.80628
Lnpep	22.097	23.1795	22.9669	19.4993	21.7717	22.4622	NA	Cell	-1.5034	21.9961	-2.06757	0.0829632	0.201081	-4.80684
Phpt1	22.7826	21.3772	21.5996	23.9785	22.2197	22.9028	NA	Cell	1.11388	22.4767	2.06658	0.0830774	0.201253	-4.80819
Prpf6	26.0171	26.4069	26.3993	26.3601	27.5424	27.4522	NA	Cell	0.843811	26.6963	2.06583	0.0831657	0.201257	-4.80924
Ptrh2	25.5586	25.1211	24.9533	23.9587	25.157	22.4736	NA	Cell	-1.3479	24.537	-2.06592	0.0831549	0.201257	-4.80911
Wdhd1	20.7186	24.7113	24.5556	18.0774	22.5295	21.452	NA	Cell	-2.64221	22.0074	-2.06388	0.0833924	0.201701	-4.81192
Dnajc5	23.0096	23.3595	23.9311	20.9798	14.1392	22.9065	NA	Cell	-4.09157	21.3876	-2.06315	0.0834776	0.201803	-4.81293
Dtymk	22.7833	23.9234	23.7263	23.1694	22.0721	22.049	NA	Cell	-1.04753	22.9539	-2.06214	0.083596	0.201984	-4.81433
UncharacterizedproteinC1orf50homologOS=MusmusculusPE=2SV=1	NA	21.7053	21.5571	NA	20.7753	17.8366	NA	Cell	-2.32522	20.4686	-2.26392	0.0837549	0.202263	-4.45928
Psap	24.0875	25.2474	24.847	24.7032	22.8468	22.4426	NA	Cell	-1.39639	24.0291	-2.06009	0.0838364	0.202355	-4.81716
Isy1	22.4294	22.7315	23.052	22.2779	25.8664	25.5646	NA	Cell	1.832	23.6536	2.05954	0.0839003	0.202404	-4.81791
Bccip	NA	21.7	21.4193	NA	19.9963	NA	NA	Cell	-1.59035	21.0385	-2.49158	0.0841118	0.202599	-4.13956
Diablo	22.9225	23.376	23.4392	23.2733	19.1398	21.4234	NA	Cell	-1.96704	22.2624	-2.05794	0.0840887	0.202599	-4.82012
[truncated: 2,710 more rows]

## Sheet: PSM
Gene Symbol	Category	Division	N PSM E14,5 A	N PSM E14,5 B	N PSM E14,5 C	MOYENNE PSM E14,5	N PSM P1 A	N PSM P1 B	N PSM P1 C	MOYENNE PSM P1	logFC	AveExpr	t	P.Value	adj.P.Val	B
Ti0gl1	ECM Glycoproteins	Core matrisome	1.04936	0.8245	2.3086	1.39415	5.7715	7.21437	7.21437	6.73342	5.33926	4.06379	7.44985	0.00067471	0.00748771	0.120317		Matrisome associated
Col18a1	Collagens	Core matrisome	12.5924	16.0777	15.7754	14.8152	5.7715	4.32862	7.21437	5.7715	-9.04368	10.2933	-6.92366	0.000947676	0.00902127	-0.139676		Core Matrisome
Agrn	ECM Glycoproteins	Core matrisome	13.6417	20.2002	17.3145	17.0522	5.7715	8.65725	2.88575	5.7715	-11.2807	11.4118	-4.91514	0.00436533	0.0234843	-1.43862		adj p value under 0,05
Creld2	ECM Glycoproteins	Core matrisome	1.04936	2.88575	2.3086	2.08124	5.7715	4.32862	5.7715	5.29054	3.2093	3.68589	4.22716	0.00819362	0.0361367	-2.02359
Lamb2	ECM Glycoproteins	Core matrisome	2.09873	1.23675	1.92383	1.7531	5.7715	12.9859	10.1001	9.61917	7.86606	5.68613	4.07565	0.00949602	0.0390053	-2.16371
Pxdn	ECM Glycoproteins	Core matrisome	10.4936	14.0165	12.3125	12.2742	5.7715	8.65725	7.21437	7.21437	-5.05985	9.7443	-4.07006	0.00954841	0.0390053	-2.16896
Vwf	ECM Glycoproteins	Core matrisome	NA	2.06125	2.3086	2.18492	NA	14.4287	10.1001	12.2644	10.0795	7.22468	5.37641	0.0123727	0.0456985	-2.20483
Lama1	ECM Glycoproteins	Core matrisome	8.91959	7.83275	9.61917	8.7905	NA	5.7715	2.88575	4.32862	-4.46214	7.00575	-3.71205	0.0204232	0.0630315	-2.74039
AW551984	ECM Glycoproteins	Core matrisome	2.09873	1.23675	2.3086	1.88136	5.7715	NA	NA	5.7715	3.89102	2.85389	4.32581	0.022447	0.0672846	-2.71816
Col6a6	Collagens	Core matrisome	2.09873	3.71025	3.07813	2.96237	5.7715	20.2002	20.2002	15.3907	12.4283	9.17652	2.8627	0.0351219	0.091187	-3.43795
Col3a1	Collagens	Core matrisome	2.09873	5.35925	4.6172	4.02506	5.7715	12.9859	11.543	10.1001	6.07507	7.06259	2.76266	0.0395272	0.0994014	-3.55443
Mfge8	ECM Glycoproteins	Core matrisome	1.04936	1.649	1.53907	1.41248	5.7715	50.5006	47.6149	34.629	33.2165	18.0207	2.56829	0.0499397	0.114469	-3.78473
Lum	Proteoglycans	Core matrisome	8.39491	10.7185	8.46487	9.19276	5.7715	1.44287	7.21437	4.80958	-4.38317	7.00117	-2.52211	0.0528343	0.119491	-3.84014
Vtn	ECM Glycoproteins	Core matrisome	2.09873	1.23675	3.07813	2.13787	5.7715	33.1861	51.9435	30.3004	28.1625	16.2191	2.34556	0.0657037	0.138938	-4.05392
Col15a1	Collagens	Core matrisome	4.72214	5.35925	6.9258	5.66906	5.7715	15.8716	18.7574	13.4668	7.79777	9.56795	2.17019	0.0818915	0.163297	-4.26854
Slit3	ECM Glycoproteins	Core matrisome	2.62341	2.06125	1.53907	2.07458	NA	4.32862	NA	4.32862	2.254	2.63809	2.54599	0.0836479	0.165767	-3.85348
Col6a2	Collagens	Core matrisome	7.34554	11.9552	13.0821	10.7943	5.7715	190.459	170.259	122.163	111.369	66.4788	2.12788	0.0864011	0.168978	-4.3205
Mmrn2	ECM Glycoproteins	Core matrisome	2.62341	1.23675	NA	1.93008	5.7715	NA	NA	5.7715	3.84421	3.21055	3.04254	0.0919679	0.17725	-3.71948
Postn	ECM Glycoproteins	Core matrisome	7.87023	5.35925	5.7715	6.33366	5.7715	83.6867	56.2721	48.5768	42.2431	27.4552	2.06866	0.0931604	0.178826	-4.39329
Fgg	ECM Glycoproteins	Core matrisome	3.67277	7.00825	10.0039	6.89498	5.7715	33.1861	28.8575	22.605	15.7101	14.75	2.01441	0.0998405	0.187562	-4.45995
Col6a1	Collagens	Core matrisome	20.9873	21.8492	23.4708	22.1024	5.7715	209.217	190.459	135.149	113.047	78.6259	1.94699	0.108845	0.199312	-4.5427
Col6a3	Collagens	Core matrisome	34.1043	35.8657	34.2442	34.7381	5.7715	331.861	277.032	204.888	170.15	119.813	1.88721	0.117535	0.210636	-4.61591
Col4a1	Collagens	Core matrisome	3.67277	8.65725	11.1582	7.82942	5.7715	28.8575	27.4146	20.6812	12.8518	14.2553	1.84131	0.124688	0.219886	-4.67195
Fgb	ECM Glycoproteins	Core matrisome	4.19745	4.1225	4.23243	4.18413	5.7715	7.21437	17.3145	10.1001	5.916	7.14213	1.80817	0.13013	0.225513	-4.71231
Col1a1	Collagens	Core matrisome	6.82086	6.596	6.15627	6.52438	5.7715	5.7715	5.7715	5.7715	-0.752877	6.14794	-1.73643	0.142752	0.239191	-4.79926
Col4a2	Collagens	Core matrisome	5.7715	10.3062	10.7735	8.9504	5.7715	33.1861	27.4146	22.1241	13.1737	15.5372	1.73031	0.143884	0.240539	-4.80664
Ogn	Proteoglycans	Core matrisome	2.09873	1.649	3.07813	2.27529	NA	5.7715	2.88575	4.32862	2.05369	3.09662	1.78021	0.149267	0.246472	-4.6784
Fn1	ECM Glycoproteins	Core matrisome	39.3511	38.3392	50.0197	42.57	5.7715	239.517	216.431	153.907	111.337	98.2383	1.67177	0.155183	0.253087	-4.87703
Col12a1	Collagens	Core matrisome	19.9379	20.2002	21.5469	20.5617	5.7715	102.444	86.5725	64.9294	44.3677	42.7455	1.65698	0.158176	0.256398	-4.89473
Nid1	ECM Glycoproteins	Core matrisome	23.6107	32.1555	31.9356	29.2339	5.7715	135.63	135.63	92.344	63.1101	60.789	1.6263	0.164566	0.262119	-4.9313
Fbln5	ECM Glycoproteins	Core matrisome	0.524682	NA	NA	0.524682	5.7715	25.9717	27.4146	19.7193	19.2508	14.9206	1.68705	0.189535	0.29082	-4.63508
Slit2	ECM Glycoproteins	Core matrisome	NA	0.41225	2.3086	1.36042	NA	2.88575	2.88575	2.88575	1.52532	2.12309	1.53283	0.222221	0.325888	-4.88794
Fbn2	ECM Glycoproteins	Core matrisome	1.04936	21.0247	27.7032	16.5924	5.7715	11.543	2.88575	6.73342	-9.85902	11.6629	-1.31034	0.246813	0.35158	-5.29452
Vcan	Proteoglycans	Core matrisome	5.24682	5.7715	3.4629	4.82707	5.7715	1.44287	1.44287	2.88575	-1.94132	3.85641	-1.30438	0.248689	0.35383	-5.30107
Dmbt1	ECM Glycoproteins	Core matrisome	NA	NA	1.53907	1.53907	5.7715	341.961	401.119	249.617	247.468	187.598	1.23314	0.304779	0.412161	-5.07677
Col5a1	Collagens	Core matrisome	3.67277	4.947	1.92383	3.51454	NA	2.88575	1.44287	2.16431	-1.35054	2.97445	-1.13151	0.320768	0.428769	-5.37829
Hspg2	Proteoglycans	Core matrisome	58.2397	66.3722	57.3302	60.6474	5.7715	181.802	154.388	113.987	53.3397	87.3172	1.08902	0.32563	0.434052	-5.52715
Emilin1	ECM Glycoproteins	Core matrisome	13.6417	14.4287	11.9278	13.3327	5.7715	15.8716	10.1001	10.5811	-2.75166	11.9569	-1.00851	0.35931	0.466692	-5.60556
Fbn1	ECM Glycoproteins	Core matrisome	1.57405	23.4982	23.086	16.0528	5.7715	34.629	30.3004	23.567	7.51419	19.8099	0.726177	0.500155	0.596684	-5.84676
Nid2	ECM Glycoproteins	Core matrisome	11.543	14.841	12.6973	13.0271	5.7715	24.5289	18.7574	16.3526	3.32548	14.6898	0.657986	0.539512	0.632568	-5.89581
Kcp	ECM Glycoproteins	Core matrisome	NA	1.649	1.53907	1.59403	NA	1.44287	2.88575	2.16431	0.570279	1.87917	0.662749	0.554554	0.64419	-5.6883
Fga	ECM Glycoproteins	Core matrisome	8.91959	4.1225	3.84767	5.62992	5.7715	8.65725	5.7715	6.73342	1.1035	6.18167	0.630636	0.555863	0.645396	-5.91436
Lama4	ECM Glycoproteins	Core matrisome	7.87023	9.894	10.7735	9.51256	5.7715	12.9859	14.4287	11.062	1.54948	10.2873	0.607821	0.569745	0.657992	-5.92932
Lamb1	ECM Glycoproteins	Core matrisome	54.5669	63.8987	66.5646	61.6768	5.7715	70.7009	76.4724	50.9816	-10.6952	56.3292	-0.520519	0.624831	0.705095	-5.98212
Col14a1	Collagens	Core matrisome	20.9873	25.1472	24.6251	23.5865	5.7715	43.2862	36.0719	28.3765	4.79001	25.9815	0.462491	0.663079	0.735864	-6.01317
Vwa5a	ECM Glycoproteins	Core matrisome	6.29618	4.947	2.3086	4.51726	5.7715	NA	1.44287	3.60719	-0.910939	4.15323	-0.460028	0.669271	0.740335	-5.90581
Dcn	Proteoglycans	Core matrisome	6.29618	4.53475	5.00197	5.27763	5.7715	NA	NA	5.7715	0.497973	5.4011	0.443493	0.687247	0.754612	-5.6938
Bgn	Proteoglycans	Core matrisome	8.39491	6.18375	4.6172	6.39862	5.7715	NA	NA	5.7715	-0.619073	6.24184	-0.321238	0.768971	0.823872	-5.74761
Aebp1	ECM Glycoproteins	Core matrisome	1.57405	NA	1.53907	1.55656	NA	NA	1.44287	1.44287	-0.113752	1.51866	-0.121211	0.9145	0.938494	-5.74568
Lamc1	ECM Glycoproteins	Core matrisome	45.1226	61.013	59.2541	55.1299	5.7715	80.801	86.5725	57.715	2.5851	56.4224	0.108954	0.917459	0.940317	-6.12607
Sparcl1	ECM Glycoproteins	Core matrisome	4.19745	4.1225	2.69337	3.67111	5.7715	NA	1.44287	3.60719	-0.0648293	3.64554	-0.0410072	0.969245	0.976201	-6.02607
Lama5	ECM Glycoproteins	Core matrisome	55.0916	64.7232	58.8693	59.5614	5.7715	93.7869	80.801	60.1198	0.558411	59.8406	0.0226331	0.982815	0.986121	-6.13256
Tgfbi	ECM Glycoproteins	Core matrisome	4.72214	3.298	4.6172	4.21245	NA	NA	NA	NA	NA	4.21245	NA	NA	NA	NA
Mfap1b	ECM Glycoproteins	Core matrisome	4.19745	1.23675	3.07813	2.83745	NA	NA	NA	NA	NA	2.83745	NA	NA	NA	NA
Fras1	ECM Glycoproteins	Core matrisome	3.14809	9.0695	8.0801	6.7659	NA	NA	NA	NA	NA	6.7659	NA	NA	NA	NA
Thbs1	ECM Glycoproteins	Core matrisome	3.14809	1.649	3.4629	2.75333	NA	NA	NA	NA	NA	2.75333	NA	NA	NA	NA
Col1a2	Collagens	Core matrisome	2.62341	2.06125	2.3086	2.33109	NA	NA	NA	NA	NA	2.33109	NA	NA	NA	NA
Emilin3	ECM Glycoproteins	Core matrisome	1.57405	2.06125	1.53907	1.72479	NA	NA	NA	NA	NA	1.72479	NA	NA	NA	NA
Smoc1	ECM Glycoproteins	Core matrisome	1.57405	1.649	1.1543	1.45912	NA	NA	NA	NA	NA	1.45912	NA	NA	NA	NA
Lama2	ECM Glycoproteins	Core matrisome	NA	NA	NA	NA	5.7715	112.544	99.5584	72.6247	NA	72.6247	NA	NA	NA	NA
Gpc1	ECM-affiliated Proteins	Matrisome-associated	14.6911	13.6042	13.4668	13.9207	NA	1.44287	NA	1.44287	-12.4791	10.8013	-12.9983	0.000948765	0.00902127	-1.26277
Lgals1	ECM-affiliated Proteins	Matrisome-associated	19.4132	24.3227	18.084	20.6067	5.7715	8.65725	2.88575	5.7715	-14.8352	13.1891	-6.45859	0.0013035	0.0107992	-0.394049
Lman1	ECM-affiliated Proteins	Matrisome-associated	21.512	19.788	24.6251	21.975	5.7715	4.32862	11.543	7.21437	-14.7606	14.5947	-6.2016	0.00156735	0.0119537	-0.545485
Frem2	ECM-affiliated Proteins	Matrisome-associated	38.3018	51.119	51.174	46.8649	5.7715	20.2002	17.3145	14.4287	-32.4362	30.6468	-5.87513	0.00199893	0.0139051	-0.749939
Hcfc1	Secreted Factors	Matrisome-associated	17.8392	19.788	15.0059	17.5444	5.7715	7.21437	NA	6.49294	-11.0463	13.1238	-6.51959	0.00280541	0.0175688	-1.06462
Gpc3	ECM-affiliated Proteins	Matrisome-associated	12.5924	11.1307	13.0821	12.2684	5.7715	4.32862	8.65725	6.25246	-6.01593	9.26043	-4.57159	0.00593075	0.0288791	-1.72046
S100a13	Secreted Factors	Matrisome-associated	NA	2.06125	2.3086	2.18492	NA	8.65725	7.21437	7.93581	5.75089	5.06037	6.64805	0.00678366	0.0319247	-1.79784
S100a9	Secreted Factors	Matrisome-associated	NA	0.41225	NA	0.41225	NA	14.4287	15.8716	15.1502	14.7408	10.2375	11.4561	0.00725035	0.0333251	-2.44652
Serpinh1	ECM Regulators	Matrisome-associated	115.955	100.177	113.121	109.751	5.7715	31.7432	75.0295	37.5147	-72.2362	73.6328	-3.88697	0.0114652	0.0436298	-2.34413
Plod1	ECM Regulators	Matrisome-associated	9.96895	11.543	10.3887	10.6336	5.7715	NA	NA	5.7715	-4.86473	9.41804	-4.6138	0.0188611	0.0596775	-2.58851
Serpinf1	ECM Regulators	Matrisome-associated	1.57405	2.4735	1.92383	1.99046	5.7715	NA	NA	5.7715	3.77936	2.93572	4.4999	0.0201839	0.0625439	-2.63832
Anxa13	ECM-affiliated Proteins	Matrisome-associated	2.62341	2.88575	2.3086	2.60592	5.7715	24.5289	27.4146	19.2383	16.6324	10.9221	2.73448	0.0408765	0.101173	-3.58751
Cstb	ECM Regulators	Matrisome-associated	NA	2.88575	2.3086	2.59717	NA	NA	7.21437	7.21437	4.61604	4.13624	4.60611	0.0431654	0.104561	-3.13654
Anxa1	ECM-affiliated Proteins	Matrisome-associated	3.67277	4.1225	4.6172	4.13749	5.7715	23.086	25.9717	18.2764	14.1389	11.207	2.49749	0.0544519	0.122222	-3.86977
Ctsb	ECM Regulators	Matrisome-associated	4.72214	7.83275	6.15627	6.23705	NA	NA	1.44287	1.44287	-4.7945	5.03851	-2.93414	0.0602689	0.13061	-3.54972
Serpini2	ECM Regulators	Matrisome-associated	1.57405	2.88575	1.92383	2.12788	5.7715	57.715	77.9152	47.1339	45.006	24.6309	2.34102	0.0660764	0.139471	-4.05945
Ctsl	ECM Regulators	Matrisome-associated	0.524682	NA	NA	0.524682	5.7715	4.32862	NA	5.05006	4.52247	3.5416	3.51473	0.0711808	0.1473	-3.50215
Gpc4	ECM-affiliated Proteins	Matrisome-associated	7.87023	9.48175	8.46487	8.60561	5.7715	NA	NA	5.7715	-2.83708	7.89709	-2.69102	0.0737827	0.152157	-3.73604
Prss2	ECM Regulators	Matrisome-associated	0.524682	0.41225	4.6172	1.85138	5.7715	139.959	186.131	110.62	108.769	56.2359	2.24743	0.0742902	0.152676	-4.17382
Cela1	ECM Regulators	Matrisome-associated	5.24682	12.7797	10.3887	9.47176	5.7715	427.091	376.59	269.818	260.346	139.645	2.19119	0.0797456	0.160509	-4.24276
Serpi06	ECM Regulators	Matrisome-associated	7.87023	9.894	10.0039	9.25605	5.7715	NA	NA	5.7715	-3.49014	8.38491	-2.60016	0.0797835	0.160509	-3.80907
Cela2a	ECM Regulators	Matrisome-associated	4.19745	17.7267	15.0059	12.31	5.7715	431.42	418.434	285.208	272.898	148.759	2.18198	0.0806791	0.161843	-4.25406
Cst3	ECM Regulators	Matrisome-associated	3.14809	4.1225	3.07813	3.44957	5.7715	NA	NA	5.7715	2.32071	4.03006	2.55472	0.08301	0.1648	-3.84628
Prss3	ECM Regulators	Matrisome-associated	1.04936	0.41225	3.07813	1.51325	5.7715	155.83	246.732	136.111	134.598	68.8122	2.14199	0.0848685	0.167352	-4.30317
Try5	ECM Regulators	Matrisome-associated	12.5924	10.7185	11.9278	11.7462	5.7715	303.004	373.705	227.493	215.747	119.62	2.14007	0.0850751	0.167423	-4.30552
Anxa3	ECM-affiliated Proteins	Matrisome-associated	9.96895	10.3062	9.61917	9.96479	5.7715	118.316	113.987	79.3581	69.3933	44.6615	2.10748	0.0886692	0.172424	-4.34557
Try10	ECM Regulators	Matrisome-associated	2.09873	5.35925	4.23243	3.8968	5.7715	106.773	173.145	95.2297	91.3329	49.5633	2.09812	0.0897304	0.173921	-4.35707
Cela3b	ECM Regulators	Matrisome-associated	3.14809	9.894	11.9278	8.32329	5.7715	194.788	284.246	161.602	153.279	84.9626	2.08661	0.091055	0.175917	-4.37123
Anxa7	ECM-affiliated Proteins	Matrisome-associated	7.34554	7.83275	5.7715	6.98326	5.7715	23.086	31.7432	20.2002	13.217	13.5918	1.9264	0.11176	0.203092	-4.56794
Ambp	ECM Regulators	Matrisome-associated	4.19745	2.06125	1.53907	2.59926	5.7715	2.88575	5.7715	4.80958	2.21033	3.70442	1.84956	0.123372	0.218391	-4.6619
A2m	ECM Regulators	Matrisome-associated	0.524682	1.649	2.3086	1.49409	5.7715	4.32862	1.44287	3.84767	2.35357	2.67088	1.8237	0.127551	0.222468	-4.69342
Anxa11	ECM-affiliated Proteins	Matrisome-associated	8.39491	11.9552	10.7735	10.3745	5.7715	41.8434	41.8434	29.8194	19.4449	20.097	1.79964	0.131571	0.227484	-4.72269
Gpc6	ECM-affiliated Proteins	Matrisome-associated	7.34554	10.3062	10.3887	9.34683	5.7715	NA	NA	5.7715	-3.5834	8.453	-2.0078	0.13763	0.234227	-4.32839
Anxa5	ECM-affiliated Proteins	Matrisome-associated	47.746	31.331	36.9376	38.6715	5.7715	229.417	248.174	161.121	122.449	99.8963	1.75546	0.139289	0.236043	-4.77626
Anxa4	ECM-affiliated Proteins	Matrisome-associated	26.2341	45.7597	34.2442	35.4127	5.7715	227.974	207.774	147.173	111.761	91.293	1.75544	0.139291	0.236043	-4.77628
Sdc4	ECM-affiliated Proteins	Matrisome-associated	1.57405	1.23675	1.1543	1.3217	5.7715	1.44287	2.88575	3.36671	2.04501	2.3442	1.68857	0.151852	0.249188	-4.85688
Adam10	ECM Regulators	Matrisome-associated	6.29618	5.7715	6.54103	6.2029	5.7715	NA	1.44287	3.60719	-2.59485	5.16462	-1.72669	0.158918	0.256626	-4.73841
Anxa2	ECM-affiliated Proteins	Matrisome-associated	43.5486	48.2332	45.7872	45.8564	5.7715	216.431	284.246	168.816	122.96	107.336	1.63958	0.161769	0.259569	-4.91549
F13a1	ECM Regulators	Matrisome-associated	5.7715	4.53475	6.15627	5.48751	5.7715	2.88575	2.88575	3.84767	-1.63984	4.66759	-1.57079	0.176784	0.276594	-4.99701
P4ha2	ECM Regulators	Matrisome-associated	4.72214	4.53475	3.84767	4.36818	5.7715	NA	NA	5.7715	1.40474	4.71901	1.66588	0.193685	0.295292	-4.65569
Serpinf2	ECM Regulators	Matrisome-associated	3.67277	3.71025	3.07813	3.48705	5.7715	2.88575	7.21437	5.29054	1.80349	4.3888	1.48004	0.198694	0.299863	-5.10293
Tgm2	ECM Regulators	Matrisome-associated	11.543	12.3675	15.0059	12.9721	5.7715	31.7432	30.3004	22.605	9.63291	17.7886	1.26632	0.260963	0.366917	-5.34254
S100a10	Secreted Factors	Matrisome-associated	3.14809	3.298	5.00197	3.81602	5.7715	4.32862	NA	5.05006	1.23165	4.30964	1.29577	0.264427	0.370259	-5.21015
Plg	ECM Regulators	Matrisome-associated	1.57405	NA	NA	1.57405	5.7715	18.7574	7.21437	10.5811	9.02642	8.32932	1.33977	0.272178	0.378889	-4.97421
Ctsd	ECM Regulators	Matrisome-associated	3.67277	6.18375	5.7715	5.20934	5.7715	2.88575	2.88575	3.84767	-1.36167	4.5285	-1.16071	0.29795	0.405857	-5.45433
Anxa6	ECM-affiliated Proteins	Matrisome-associated	94.9674	136.042	123.895	118.302	5.7715	331.861	328.975	222.203	103.901	170.252	1.06634	0.334834	0.443841	-5.54961
Anxa6	ECM-affiliated Proteins	Matrisome-associated	94.9674	139.753	123.895	119.538	5.7715	328.975	328.975	221.241	101.702	170.39	1.04734	0.342716	0.450783	-5.56821
Anxa6	ECM-affiliated Proteins	Matrisome-associated	94.9674	136.042	125.434	118.815	5.7715	331.861	315.99	217.874	99.0595	168.344	1.03604	0.347475	0.454288	-5.57917
Sdc1	ECM-affiliated Proteins	Matrisome-associated	3.14809	NA	2.3086	2.72835	NA	NA	1.44287	1.44287	-1.28716	2.29986	-1.2041	0.350616	0.457892	-5.04149
Anxa6	ECM-affiliated Proteins	Matrisome-associated	94.9674	139.753	125.434	120.051	5.7715	328.975	315.99	216.912	96.8608	168.482	1.01685	0.355688	0.462491	-5.59761
Serpi01e	ECM Regulators	Matrisome-associated	4.72214	NA	NA	4.72214	5.7715	5.7715	NA	5.7715	1.04936	5.42171	1.11846	0.378633	0.484666	-5.11692
Serpi01b	ECM Regulators	Matrisome-associated	7.87023	13.192	9.2344	10.0989	5.7715	2.88575	12.9859	7.21437	-2.8845	8.65662	-0.941124	0.389677	0.496407	-5.66818
Serpinb1a	ECM Regulators	Matrisome-associated	4.19745	5.35925	5.00197	4.85289	5.7715	NA	1.44287	3.60719	-1.24672	4.35461	-0.815118	0.460527	0.560335	-5.6667
Plxnb2	ECM-affiliated Proteins	Matrisome-associated	22.0366	27.6207	25.3946	25.0173	5.7715	56.2721	36.0719	32.7052	7.68784	28.8612	0.581699	0.585905	0.673072	-5.94586
Serpi01a	ECM Regulators	Matrisome-associated	5.24682	11.1307	8.46487	8.28081	5.7715	5.7715	10.1001	7.21437	-1.06644	7.74759	-0.524263	0.622407	0.703876	-5.98001
Ctsa	ECM Regulators	Matrisome-associated	4.19745	3.298	3.07813	3.52453	5.7715	1.44287	4.32862	3.84767	0.323137	3.6861	0.259705	0.805403	0.853327	-6.09455
Serpi01d	ECM Regulators	Matrisome-associated	4.72214	9.48175	6.54103	6.91497	5.7715	5.7715	10.1001	7.21437	0.299402	7.06467	0.163366	0.876602	0.907013	-6.11763
Itih2	ECM Regulators	Matrisome-associated	1.57405	3.71025	3.84767	3.04399	NA	NA	2.88575	2.88575	-0.154998	3.00443	-0.110634	0.918847	0.940999	-5.80168
Serpinb6a	ECM Regulators	Matrisome-associated	5.24682	NA	6.54103	5.89393	NA	NA	5.7715	5.7715	-0.119817	5.85312	-0.097697	0.930999	0.950111	-5.74913
Ogfod1	ECM Regulators	Matrisome-associated	2.09873	NA	0.769533	1.43413	NA	NA	1.44287	1.44287	0.00606572	1.43705	0.00489063	0.996538	0.996955	-5.75553
Cspg4	ECM-affiliated Proteins	Matrisome-associated	17.3145	15.6655	15.7754	16.2518	NA	NA	NA	NA	NA	16.2518	NA	NA	NA	NA
P4ha1	ECM Regulators	Matrisome-associated	8.91959	9.0695	11.543	9.84403	NA	NA	NA	NA	NA	9.84403	NA	NA	NA	NA
Plod3	ECM Regulators	Matrisome-associated	7.87023	7.83275	6.54103	7.41467	NA	NA	NA	NA	NA	7.41467	NA	NA	NA	NA
Plxdc2	ECM-affiliated Proteins	Matrisome-associated	3.67277	2.4735	3.84767	3.33131	NA	NA	NA	NA	NA	3.33131	NA	NA	NA	NA
Plxnd1	ECM-affiliated Proteins	Matrisome-associated	3.14809	2.88575	3.84767	3.29384	NA	NA	NA	NA	NA	3.29384	NA	NA	NA	NA
St14	ECM Regulators	Matrisome-associated	3.14809	4.1225	1.53907	2.93655	NA	NA	NA	NA	NA	2.93655	NA	NA	NA	NA
Fam20b	ECM Regulators	Matrisome-associated	2.09873	2.4735	3.4629	2.67838	NA	NA	NA	NA	NA	2.67838	NA	NA	NA	NA
Plx01	ECM-affiliated Proteins	Matrisome-associated	2.09873	1.649	2.69337	2.14703	NA	NA	NA	NA	NA	2.14703	NA	NA	NA	NA
Serpine2	ECM Regulators	Matrisome-associated	2.09873	3.71025	2.69337	2.83411	NA	NA	NA	NA	NA	2.83411	NA	NA	NA	NA
Adam17	ECM Regulators	Matrisome-associated	2.09873	2.06125	1.92383	2.02794	NA	NA	NA	NA	NA	2.02794	NA	NA	NA	NA
Crlf3	Secreted Factors	Matrisome-associated	2.09873	1.23675	1.1543	1.49659	NA	NA	NA	NA	NA	1.49659	NA	NA	NA	NA
Plod2	ECM Regulators	Matrisome-associated	1.57405	4.53475	4.23243	3.44708	NA	NA	NA	NA	NA	3.44708	NA	NA	NA	NA
Lgals8	ECM-affiliated Proteins	Matrisome-associated	NA	NA	NA	NA	5.7715	5.7715	4.32862	5.29054	NA	5.29054	NA	NA	NA	NA
Syne2	Non-matrisome	Non-matrisome	82.8997	83.6867	81.5705	82.719	5.7715	4.32862	4.32862	4.80958	-77.9094	43.7643	-96.7955	2.07683e-09	4.95533e-06	3.09322
Ranbp2	Non-matrisome	Non-matrisome	40.9252	41.6372	42.3243	41.6289	5.7715	5.7715	4.32862	5.29054	-36.3384	23.4597	-52.8951	4.30555e-08	5.13652e-05	3.01694
Utrn	Non-matrisome	Non-matrisome	30.9562	30.0942	32.3204	31.1236	5.7715	4.32862	5.7715	5.29054	-25.8331	18.2071	-31.3261	5.93383e-07	0.000310186	2.82527
Smarcc1	Non-matrisome	Non-matrisome	27.8081	26.384	27.7032	27.2984	5.7715	4.32862	5.7715	5.29054	-22.0079	16.2945	-30.7601	6.50012e-07	0.000310186	2.81471
Ap2b1	Non-matrisome	Non-matrisome	36.7277	35.4535	36.9376	36.3729	5.7715	2.88575	2.88575	3.84767	-32.5253	20.1103	-31.4337	5.83299e-07	0.000310186	2.82722
Tcp1	Non-matrisome	Non-matrisome	46.6967	49.47	49.6349	48.6005	5.7715	4.32862	8.65725	6.25246	-42.3481	27.4265	-28.6747	9.23148e-07	0.000314662	2.77067
Hadha	Non-matrisome	Non-matrisome	68.2086	74.6172	71.1818	71.3359	5.7715	2.88575	8.65725	5.7715	-65.5644	38.5537	-29.0062	8.71632e-07	0.000314662	2.77826
Ilf2	Non-matrisome	Non-matrisome	36.7277	37.927	37.7071	37.454	5.7715	4.32862	8.65725	6.25246	-31.2015	21.8532	-24.9703	1.8413e-06	0.000488149	2.66643
Prpf8	Non-matrisome	Non-matrisome	83.9491	76.2662	73.4904	77.9019	5.7715	5.7715	5.7715	5.7715	-72.1304	41.8367	-25.5289	1.64891e-06	0.000488149	2.68481
Chd4	Non-matrisome	Non-matrisome	48.2707	48.2332	53.8673	50.1238	5.7715	4.32862	7.21437	5.7715	-44.3523	27.9476	-23.6277	2.42536e-06	0.000578692	2.61743
Cct5	Non-matrisome	Non-matrisome	47.2214	53.5925	51.9435	50.9191	5.7715	1.44287	4.32862	3.84767	-47.0715	27.3834	-22.5589	3.05432e-06	0.000607301	2.57279
Mcm5	Non-matrisome	Non-matrisome	32.5303	32.1555	31.1661	31.9506	5.7715	2.88575	1.44287	3.36671	-28.5839	17.6587	-22.6822	2.97249e-06	0.000607301	2.57822
Tmpo	Non-matrisome	Non-matrisome	29.3822	29.2697	29.627	29.4263	5.7715	NA	7.21437	6.49294	-22.9331	20.253	-33.2189	4.65092e-06	0.000684601	1.01686
Hnrnpl	Non-matrisome	Non-matrisome	49.3201	51.5312	47.7111	49.5208	5.7715	NA	5.7715	5.7715	-43.7534	32.0211	-32.8267	4.87771e-06	0.000684601	1.01346
Hnrnpr	Non-matrisome	Non-matrisome	32.5303	36.278	37.3224	35.3769	5.7715	4.32862	5.7715	5.29054	-30.0863	20.3337	-21.0951	4.26484e-06	0.000684601	2.50183
Cand1	Non-matrisome	Non-matrisome	32.5303	31.331	33.8595	32.5736	5.7715	2.88575	1.44287	3.36671	-29.2069	17.9701	-21.3183	4.04729e-06	0.000684601	2.51347
Dctn1	Non-matrisome	Non-matrisome	30.9562	30.9187	31.1661	31.0137	5.7715	1.44287	1.44287	2.88575	-28.1279	16.9497	-20.8091	4.56443e-06	0.000684601	2.48644
Ezr	Non-matrisome	Non-matrisome	33.5796	37.1025	38.4767	36.3863	5.7715	2.88575	2.88575	3.84767	-32.5386	20.117	-20.2192	5.2658e-06	0.000698012	2.45291
Rbbp7	Non-matrisome	Non-matrisome	27.2835	29.682	31.1661	29.3772	5.7715	7.21437	7.21437	6.73342	-22.6438	18.0553	-19.352	6.5467e-06	0.000822127	2.39883
Tmpo	Non-matrisome	Non-matrisome	29.3822	28.4452	29.627	29.1515	5.7715	NA	7.21437	6.49294	-22.6571	20.0881	-28.6684	8.39315e-06	0.000929674	0.968849
Rbbp4	Non-matrisome	Non-matrisome	25.1847	24.3227	27.3184	25.6086	5.7715	2.88575	4.32862	4.32862	-21.28	14.9686	-18.3286	8.57201e-06	0.000929674	2.32662
Slc25a13	Non-matrisome	Non-matrisome	25.1847	23.9105	22.7012	23.9322	5.7715	2.88575	4.32862	4.32862	-19.6035	14.1304	-18.4764	8.23747e-06	0.000929674	2.33766
Dnmt1	Non-matrisome	Non-matrisome	26.2341	27.6207	28.088	27.3143	5.7715	1.44287	4.32862	3.84767	-23.4666	15.581	-18.0094	9.35208e-06	0.000970176	2.30198
Msn	Non-matrisome	Non-matrisome	37.7771	38.3392	32.7052	36.2738	5.7715	7.21437	5.7715	6.25246	-30.0214	21.2631	-17.5888	1.05135e-05	0.00104522	2.26783
Rps27a	Non-matrisome	Non-matrisome	NA	7.00825	10.7735	8.89086	NA	101.001	101.001	101.001	92.1104	54.946	55.5618	1.20178e-05	0.0011357	-0.554047
Acly	Non-matrisome	Non-matrisome	57.1903	57.715	52.713	55.8728	5.7715	7.21437	14.4287	9.13821	-46.7346	32.5055	-16.6473	1.38036e-05	0.0011357	2.18368
Rdx	Non-matrisome	Non-matrisome	43.5486	38.3392	36.5528	39.4802	5.7715	7.21437	7.21437	6.73342	-32.7468	23.1068	-16.6709	1.37071e-05	0.0011357	2.18593
Tmpo	Non-matrisome	Non-matrisome	29.3822	28.4452	27.7032	28.5102	5.7715	NA	7.21437	6.49294	-22.0171	19.7033	-25.3398	1.37556e-05	0.0011357	0.917349
Ssb	Non-matrisome	Non-matrisome	19.4132	18.9635	17.6993	18.692	5.7715	5.7715	7.21437	6.25246	-12.4395	12.4722	-16.75	1.33898e-05	0.0011357	2.19342
Nnt	Non-matrisome	Non-matrisome	30.9562	35.0412	34.2442	33.4139	5.7715	4.32862	8.65725	6.25246	-27.1614	19.8332	-16.5214	1.43314e-05	0.00113982	2.17155
Tmpo	Non-matrisome	Non-matrisome	29.3822	29.2697	27.7032	28.785	5.7715	NA	7.21437	6.49294	-22.2931	19.8682	-24.515	1.57022e-05	0.00117587	0.901481
Copb1	Non-matrisome	Non-matrisome	33.5796	38.7515	35.0138	35.7816	5.7715	4.32862	8.65725	6.25246	-29.5292	21.017	-16.1423	1.60734e-05	0.00117587	2.13364
Gart	Non-matrisome	Non-matrisome	18.3639	18.9635	20.7774	19.3683	5.7715	4.32862	5.7715	5.29054	-14.0777	12.3294	-16.104	1.62631e-05	0.00117587	2.12969
Rpl4	Non-matrisome	Non-matrisome	45.6473	54.417	46.5568	48.8737	5.7715	5.7715	8.65725	6.73342	-42.1403	27.8036	-15.8263	1.77216e-05	0.00124364	2.10039
Iqgap1	Non-matrisome	Non-matrisome	54.5669	63.4865	64.256	60.7698	5.7715	8.65725	12.9859	9.13821	-51.6316	34.954	-15.2644	2.11819e-05	0.00136595	2.03724
Atic	Non-matrisome	Non-matrisome	28.3328	33.8045	31.9356	31.3576	5.7715	4.32862	7.21437	5.7715	-25.5861	18.5646	-15.3677	2.04887e-05	0.00136595	2.04926
Smarca5	Non-matrisome	Non-matrisome	36.7277	44.1107	44.2482	41.6955	5.7715	2.88575	5.7715	4.80958	-36.886	23.2526	-15.2817	2.10637e-05	0.00136595	2.03927
Vwa8	Non-matrisome	Non-matrisome	13.6417	14.4287	14.2364	14.1023	5.7715	4.32862	4.32862	4.80958	-9.2927	9.45593	-14.9435	2.35203e-05	0.00147683	1.99869
Eif2s3x	Non-matrisome	Non-matrisome	21.512	22.2615	20.7774	21.5169	5.7715	8.65725	5.7715	6.73342	-14.7835	14.1252	-14.4499	2.77494e-05	0.00162431	1.93555
Tmpo	Non-matrisome	Non-matrisome	26.2341	28.4452	27.7032	27.4608	5.7715	NA	7.21437	6.49294	-20.9699	19.0737	-21.0637	2.87903e-05	0.00162431	0.815639
Kpnb1	Non-matrisome	Non-matrisome	53.5175	64.7232	62.717	60.3192	5.7715	1.44287	10.1001	5.7715	-54.5477	33.0454	-14.2453	2.97657e-05	0.00162431	1.90791
Ddx3x	Non-matrisome	Non-matrisome	48.7954	60.6007	58.0998	55.832	5.7715	1.44287	7.21437	4.80958	-51.0224	30.3208	-14.2271	2.99538e-05	0.00162431	1.9054
Pds5a	Non-matrisome	Non-matrisome	17.3145	18.5512	19.2383	18.368	5.7715	2.88575	4.32862	4.32862	-14.0394	11.3483	-14.2987	2.9223e-05	0.00162431	1.91521
Ubqln2	Non-matrisome	Non-matrisome	25.7094	21.8492	23.8555	23.8047	5.7715	2.88575	2.88575	3.84767	-19.9571	13.8262	-14.4891	2.7382e-05	0.00162431	1.94074
Uba1	Non-matrisome	Non-matrisome	58.7644	69.6702	65.4103	64.615	5.7715	1.44287	12.9859	6.73342	-57.8816	35.6742	-13.9322	3.32012e-05	0.0017604	1.86384
Dsp	Non-matrisome	Non-matrisome	22.5613	26.7962	26.9337	25.4304	5.7715	2.88575	4.32862	4.32862	-21.1018	14.8795	-13.7558	3.53458e-05	0.00183337	1.83801
Lars1	Non-matrisome	Non-matrisome	26.2341	26.7962	23.086	25.3721	5.7715	1.44287	4.32862	3.84767	-21.5244	14.6099	-13.5708	3.77743e-05	0.00191765	1.81014
Sec31a	Non-matrisome	Non-matrisome	28.8575	26.7962	27.3184	27.6574	5.7715	2.88575	8.65725	5.7715	-21.8859	16.7144	-13.3553	4.08611e-05	0.00202065	1.77658
Ctnnd1	Non-matrisome	Non-matrisome	24.66	22.2615	23.086	23.3358	5.7715	2.88575	7.21437	5.29054	-18.0453	14.3132	-13.2618	4.22929e-05	0.00202065	1.76165
Cse1l	Non-matrisome	Non-matrisome	31.4809	29.682	33.4747	31.5459	5.7715	NA	4.32862	5.05006	-26.492	20.9475	-18.9343	4.40375e-05	0.00202065	0.74052
Psmd12	Non-matrisome	Non-matrisome	28.3328	27.2085	30.3966	28.646	5.7715	NA	4.32862	5.05006	-23.593	19.2076	-18.9639	4.37641e-05	0.00202065	0.741721
Hsph1	Non-matrisome	Non-matrisome	19.9379	19.3757	20.7774	20.0304	5.7715	1.44287	2.88575	3.36671	-16.6636	11.6985	-13.2317	4.27658e-05	0.00202065	1.7568
Nasp	Non-matrisome	Non-matrisome	56.6656	54.8292	51.174	54.2229	5.7715	11.543	17.3145	11.543	-42.6799	32.883	-12.8174	4.99754e-05	0.00224984	1.68747
Mybbp1a	Non-matrisome	Non-matrisome	61.3878	52.3557	59.2541	57.6659	5.7715	5.7715	15.8716	9.13821	-48.5277	33.402	-12.4544	5.75141e-05	0.00226606	1.62263
Atp1a1	Non-matrisome	Non-matrisome	58.2397	70.0825	67.3342	65.2188	5.7715	4.32862	15.8716	8.65725	-56.5615	36.938	-12.354	5.98331e-05	0.00226606	1.604
Eif4g1	Non-matrisome	Non-matrisome	33.5796	37.927	41.5548	37.6871	5.7715	7.21437	10.1001	7.69533	-29.9918	22.6912	-12.5383	5.56581e-05	0.00226606	1.63797
Tmpo	Non-matrisome	Non-matrisome	26.2341	29.2697	27.7032	27.7357	5.7715	NA	7.21437	6.49294	-21.2458	19.2386	-17.8096	5.61977e-05	0.00226606	0.690962
Tln2	Non-matrisome	Non-matrisome	30.9562	37.927	39.2462	36.0431	5.7715	5.7715	7.21437	6.25246	-29.7907	21.1478	-12.5467	5.54751e-05	0.00226606	1.6395
Uqcrc2	Non-matrisome	Non-matrisome	35.1537	43.6985	39.2462	39.3661	5.7715	2.88575	8.65725	5.7715	-33.5946	22.5688	-12.4911	5.6692e-05	0.00226606	1.62938
Vps35	Non-matrisome	Non-matrisome	20.9873	25.5595	25.3946	23.9805	5.7715	2.88575	4.32862	4.32862	-19.6518	14.1545	-12.4321	5.80201e-05	0.00226606	1.61852
Smarca4	Non-matrisome	Non-matrisome	28.3328	25.9717	27.3184	27.2077	5.7715	2.88575	NA	4.32862	-22.8793	18.056	-17.5396	5.97195e-05	0.00226606	0.677814
Mia3	Non-matrisome	Non-matrisome	25.1847	25.9717	21.9317	24.3627	5.7715	1.44287	4.32862	3.84767	-20.5151	14.1052	-12.5505	5.53931e-05	0.00226606	1.64019
Lrpprc	Non-matrisome	Non-matrisome	38.8265	50.7067	46.5568	45.3633	5.7715	1.44287	2.88575	3.36671	-41.9966	24.365	-12.5961	5.44199e-05	0.00226606	1.64841
Vcl	Non-matrisome	Non-matrisome	35.6784	41.225	39.2462	38.7165	5.7715	8.65725	12.9859	9.13821	-29.5783	23.9274	-12.2909	6.1349e-05	0.00228717	1.59211
Ckap4	Non-matrisome	Non-matrisome	39.3511	45.3475	47.3263	44.0083	5.7715	1.44287	10.1001	5.7715	-38.2368	24.8899	-12.2393	6.26219e-05	0.00229871	1.5823
Syncrip	Non-matrisome	Non-matrisome	62.9618	55.2415	60.7931	59.6655	5.7715	11.543	18.7574	12.024	-47.6415	35.8447	-12.0395	6.78587e-05	0.00236647	1.54348
Aldh18a1	Non-matrisome	Non-matrisome	33.5796	37.927	36.9376	36.1481	5.7715	8.65725	12.9859	9.13821	-27.0099	22.6431	-11.9969	6.90403e-05	0.00236647	1.53504
Pabpc1	Non-matrisome	Non-matrisome	70.832	65.5477	65.4103	67.2634	5.7715	1.44287	18.7574	8.65725	-58.6061	37.9603	-11.8805	7.24023e-05	0.00236647	1.51161
Prdx2	Non-matrisome	Non-matrisome	37.2524	41.225	36.9376	38.4717	5.7715	5.7715	12.9859	8.17629	-30.2954	23.324	-12.0762	6.6857e-05	0.00236647	1.55072
Ddx39b	Non-matrisome	Non-matrisome	48.2707	50.2945	55.4064	51.3239	5.7715	NA	8.65725	7.21437	-44.1074	33.6801	-16.9685	6.81212e-05	0.00236647	0.648198
Sars	Non-matrisome	Non-matrisome	22.5613	20.2002	25.3946	22.7187	5.7715	4.32862	5.7715	5.29054	-17.4282	14.0046	-11.8866	7.22207e-05	0.00236647	1.51286
Tpt1	Non-matrisome	Non-matrisome	18.3639	17.3145	18.084	17.9208	5.7715	NA	4.32862	5.05006	-12.8695	12.7725	-16.8173	7.05886e-05	0.00236647	0.639919
Eif3l	Non-matrisome	Non-matrisome	26.2341	33.8045	29.2423	29.7603	5.7715	2.88575	4.32862	4.32862	-25.4317	17.0445	-11.8907	7.20987e-05	0.00236647	1.51369
Tmpo	Non-matrisome	Non-matrisome	26.2341	28.4452	29.627	28.1021	5.7715	NA	7.21437	6.49294	-21.6099	19.4584	-16.5701	7.48655e-05	0.00241391	0.625968
Ctn01	Non-matrisome	Non-matrisome	52.4682	60.6007	61.9474	58.3388	5.7715	10.1001	17.3145	11.062	-47.2767	34.7004	-11.7132	7.75789e-05	0.00246804	1.47714
Myo18a	Non-matrisome	Non-matrisome	24.1354	20.6125	21.5469	22.0983	5.7715	1.44287	1.44287	2.88575	-19.2125	12.492	-11.6491	7.9682e-05	0.0025016	1.46364
Lta4h	Non-matrisome	Non-matrisome	19.4132	20.2002	18.4688	19.3608	5.7715	NA	4.32862	5.05006	-14.3124	13.6365	-16.2445	8.10072e-05	0.00251017	0.606749
Uqcrc1	Non-matrisome	Non-matrisome	24.1354	30.5065	28.4727	27.7049	5.7715	1.44287	4.32862	3.84767	-23.8572	15.7763	-11.5564	8.28395e-05	0.00253404	1.44388
Trp53bp1	Non-matrisome	Non-matrisome	NA	19.788	19.6231	19.7055	NA	1.44287	1.44287	1.44287	-18.2627	10.5742	-28.9768	8.56378e-05	0.00258648	-0.62407
Tmpo	Non-matrisome	Non-matrisome	26.2341	29.2697	29.627	28.377	5.7715	NA	7.21437	6.49294	-21.8858	19.6233	-15.8244	8.98848e-05	0.00261543	0.580466
Upf1	Non-matrisome	Non-matrisome	25.1847	32.98	30.3966	29.5204	5.7715	2.88575	2.88575	3.84767	-25.6728	16.684	-11.3817	8.92092e-05	0.00261543	1.40574
Rtcb	Non-matrisome	Non-matrisome	28.8575	37.927	35.3985	34.061	5.7715	1.44287	2.88575	3.36671	-30.6943	18.7139	-11.3833	8.91472e-05	0.00261543	1.4061
Matr3	Non-matrisome	Non-matrisome	42.4992	33.3922	37.3224	37.7379	5.7715	2.88575	8.65725	5.7715	-31.9664	21.7547	-11.3357	9.09837e-05	0.00261551	1.39549
Hnrnpa1	Non-matrisome	Non-matrisome	87.0972	84.099	99.6546	90.2836	5.7715	10.1001	25.9717	13.9478	-76.3358	52.1157	-10.9445	0.000107892	0.00275542	1.30494
Mcm2	Non-matrisome	Non-matrisome	48.7954	61.013	64.6408	58.1497	5.7715	2.88575	10.1001	6.25246	-51.8973	32.2011	-11.0474	0.000103102	0.00275542	1.32938
Capza1	Non-matrisome	Non-matrisome	20.4626	22.2615	23.4708	22.065	5.7715	4.32862	8.65725	6.25246	-15.8125	14.1587	-10.9969	0.000105419	0.00275542	1.31745
Rpl23	Non-matrisome	Non-matrisome	39.8758	30.0942	35.0138	34.9946	5.7715	7.21437	4.32862	5.7715	-29.2231	20.3831	-10.981	0.000106163	0.00275542	1.31366
Ppp2r1a	Non-matrisome	Non-matrisome	30.4315	37.1025	34.629	34.0543	5.7715	1.44287	8.65725	5.29054	-28.7638	19.6724	-11.1186	9.99403e-05	0.00275542	1.34602
Prpf6	Non-matrisome	Non-matrisome	19.4132	21.8492	21.5469	20.9365	5.7715	1.44287	5.7715	4.32862	-16.6078	12.6325	-10.9785	0.000106282	0.00275542	1.31305
Glrx3	Non-matrisome	Non-matrisome	18.8885	19.788	20.3926	19.6897	5.7715	1.44287	5.7715	4.32862	-15.3611	12.0092	-10.9307	0.000108554	0.00275542	1.30162
Ptk7	Non-matrisome	Non-matrisome	34.629	37.5147	33.0899	35.0779	5.7715	NA	1.44287	3.60719	-31.4756	22.4896	-15.1787	0.000106033	0.00275542	0.536443
Psmc5	Non-matrisome	Non-matrisome	31.4809	33.3922	30.0118	31.6283	5.7715	NA	1.44287	3.60719	-28.0247	20.4199	-15.208	0.000105228	0.00275542	0.538537
Nt5dc2	Non-matrisome	Non-matrisome	19.4132	21.437	18.4688	19.773	NA	2.88575	2.88575	2.88575	-16.8865	13.0181	-15.3978	0.000100178	0.00275542	0.551897
Apob	Non-matrisome	Non-matrisome	37.7771	35.0412	31.1661	34.6615	NA	1.44287	1.44287	1.44287	-33.2249	21.374	-15.1066	0.000108055	0.00275542	0.531229
Nup214	Non-matrisome	Non-matrisome	16.7898	18.139	19.2383	18.0557	5.7715	1.44287	2.88575	3.36671	-14.689	10.7112	-10.8009	0.000115024	0.00288891	1.27006
Sec24c	Non-matrisome	Non-matrisome	15.7405	14.4287	16.1602	15.4431	NA	1.44287	2.88575	2.16431	-13.2794	10.1316	-14.8103	0.000116877	0.00290489	0.509154
Cltc	Non-matrisome	Non-matrisome	134.843	136.867	131.59	134.433	5.7715	25.9717	44.7291	25.4908	-108.943	79.9621	-10.7248	0.000119025	0.00290867	1.25123
Cope	Non-matrisome	Non-matrisome	14.1664	12.3675	13.4668	13.3336	5.7715	4.32862	5.7715	5.29054	-8.04304	9.31206	-10.7166	0.000119468	0.00290867	1.24918
Gdi2	Non-matrisome	Non-matrisome	32.0056	27.2085	30.3966	29.8702	5.7715	11.543	7.21437	8.17629	-21.6939	19.0233	-10.6668	0.000122191	0.00294493	1.23669
Hsd17b4	Non-matrisome	Non-matrisome	21.512	21.437	21.9317	21.6269	5.7715	1.44287	7.21437	4.80958	-16.8173	13.2182	-10.4638	0.000134089	0.00319936	1.18457
Ddx1	Non-matrisome	Non-matrisome	26.2341	25.9717	25.3946	25.8668	5.7715	10.1001	11.543	9.13821	-16.7286	17.5025	-10.3558	0.000140981	0.00329243	1.15604
Rps4x	Non-matrisome	Non-matrisome	46.6967	51.5312	51.9435	50.0571	5.7715	1.44287	15.8716	7.69533	-42.3618	28.8762	-10.2571	0.000147649	0.00329243	1.12948
Phb2	Non-matrisome	Non-matrisome	27.8081	28.033	25.3946	27.0786	5.7715	NA	8.65725	7.21437	-19.8661	19.1329	-14.0598	0.000143587	0.00329243	0.44805
Ccar2	Non-matrisome	Non-matrisome	23.086	24.735	23.8555	23.8922	5.7715	NA	8.65725	7.21437	-16.6795	17.2211	-14.1106	0.000141554	0.00329243	0.452439
Psmc4	Non-matrisome	Non-matrisome	33.055	44.1107	44.6329	40.5995	5.7715	1.44287	4.32862	3.84767	-36.7519	22.2236	-10.2605	0.000147416	0.00329243	1.13039
Fxr1	Non-matrisome	Non-matrisome	20.9873	26.384	21.9317	23.101	5.7715	2.88575	1.44287	3.36671	-19.7343	13.2338	-10.3118	0.000143913	0.00329243	1.14424
Eif3h	Non-matrisome	Non-matrisome	17.3145	15.6655	17.3145	16.7648	5.7715	2.88575	1.44287	3.36671	-13.3981	10.0658	-10.2906	0.000145346	0.00329243	1.13854
Asph	Non-matrisome	Non-matrisome	19.4132	19.3757	18.8536	19.2142	5.7715	NA	2.88575	4.32862	-14.8859	13.26	-13.8559	0.000152124	0.00336082	0.430043
Tomm70	Non-matrisome	Non-matrisome	13.6417	11.9552	11.9278	12.5082	NA	1.44287	1.44287	1.44287	-11.0677	8.0821	-13.761	0.000156313	0.00342169	0.42144
Tln1	Non-matrisome	Non-matrisome	83.9491	103.062	98.885	95.2989	5.7715	7.21437	27.4146	13.4668	-81.832	54.3828	-10.0567	0.00016239	0.00342886	1.074
Epb41l3	Non-matrisome	Non-matrisome	13.6417	15.6655	15.0059	14.771	5.7715	2.88575	2.88575	3.84767	-10.9234	9.30935	-10.0639	0.000161828	0.00342886	1.07603
Epb41l3	Non-matrisome	Non-matrisome	13.6417	15.6655	15.0059	14.771	5.7715	2.88575	2.88575	3.84767	-10.9234	9.30935	-10.0639	0.000161828	0.00342886	1.07603
Nup98	Non-matrisome	Non-matrisome	19.4132	18.9635	19.2383	19.205	NA	NA	1.44287	1.44287	-17.762	14.7645	-23.5505	0.000159872	0.00342886	-1.03684
Ap1b1	Non-matrisome	Non-matrisome	28.8575	25.9717	28.4727	27.7673	5.7715	NA	1.44287	3.60719	-24.1565	18.1033	-13.4663	0.000170265	0.00350217	0.393799
Macroh2a2	Non-matrisome	Non-matrisome	28.3328	28.4452	25.7794	27.5191	5.7715	NA	1.44287	3.60719	-23.9138	17.9544	-13.4737	0.0001699	0.00350217	0.394504
Opa1	Non-matrisome	Non-matrisome	19.4132	25.1472	23.4708	22.6771	5.7715	2.88575	1.44287	3.36671	-19.3104	13.0219	-9.9603	0.000170096	0.00350217	1.04658
Dync1h1	Non-matrisome	Non-matrisome	167.373	240.342	232.784	213.5	5.7715	10.1001	11.543	9.13821	-204.361	111.319	-9.83183	0.000181059	0.00366107	1.00926
Psmc2	Non-matrisome	Non-matrisome	22.0366	29.682	25.0098	25.5762	5.7715	2.88575	4.32862	4.32862	-21.2475	14.9524	-9.84193	0.000180167	0.00366107	1.01223
Slc25a24	Non-matrisome	Non-matrisome	8.91959	9.48175	10.0039	9.46842	NA	1.44287	1.44287	1.44287	-8.02444	6.2582	-13.224	0.000182915	0.00366753	0.369957
Supt5h	Non-matrisome	Non-matrisome	17.8392	17.3145	18.4688	17.8742	5.7715	1.44287	5.7715	4.32862	-13.5455	11.1014	-9.79014	0.000184796	0.00367436	0.996957
Abce1	Non-matrisome	Non-matrisome	16.2651	14.841	16.545	15.8837	5.7715	NA	5.7715	5.7715	-10.1101	11.8388	-13.1258	0.000188378	0.00367493	0.359987
Mcm7	Non-matrisome	Non-matrisome	38.3018	54.0047	51.5587	47.9551	5.7715	1.44287	4.32862	3.84767	-44.1074	25.9014	-9.7534	0.000188165	0.00367493	0.986034
Mogs	Non-matrisome	Non-matrisome	15.7405	17.3145	17.3145	16.7898	5.7715	1.44287	1.44287	2.88575	-13.9041	9.83778	-9.73965	0.000189445	0.00367493	0.981925
Trim28	Non-matrisome	Non-matrisome	75.5542	72.9682	72.7209	73.7478	5.7715	20.2002	27.4146	17.7955	-55.9523	45.7716	-9.71713	0.000191564	0.00368605	0.975175
Plec	Non-matrisome	Non-matrisome	99.1649	109.658	95.0374	101.287	5.7715	20.2002	34.629	20.2002	-81.0867	60.7436	-9.64039	0.000198998	0.00370945	0.951953
Fkbp4	Non-matrisome	Non-matrisome	41.9745	35.8657	39.2462	39.0288	5.7715	12.9859	14.4287	11.062	-27.9668	25.0454	-9.66834	0.000196251	0.00370945	0.96045
Mcm3	Non-matrisome	Non-matrisome	40.9252	34.2167	38.4767	37.8729	5.7715	NA	1.44287	3.60719	-34.2583	24.1666	-12.9494	0.000198701	0.00370945	0.341645
Nudc	Non-matrisome	Non-matrisome	17.3145	21.437	18.4688	19.0734	5.7715	1.44287	2.88575	3.36671	-15.7067	11.2201	-9.64972	0.000198075	0.00370945	0.954797
Psmd1	Non-matrisome	Non-matrisome	36.7277	39.576	33.4747	36.5928	5.7715	10.1001	14.4287	10.1001	-26.4927	23.3465	-9.59563	0.000203492	0.00371807	0.938255
Mapk1	Non-matrisome	Non-matrisome	20.9873	27.2085	21.5469	23.2476	5.7715	4.32862	5.7715	5.29054	-17.957	14.2691	-9.60616	0.000202424	0.00371807	0.941487
Srrm2	Non-matrisome	Non-matrisome	18.8885	16.0777	19.6231	18.1965	5.7715	1.44287	2.88575	3.36671	-14.8298	10.7816	-9.58932	0.000204135	0.00371807	0.936314
Nono	Non-matrisome	Non-matrisome	55.0916	44.523	50.7892	50.1346	5.7715	NA	2.88575	4.32862	-45.7947	31.8122	-12.7626	0.000210412	0.00377476	0.321565
Ogdh	Non-matrisome	Non-matrisome	31.4809	28.8575	34.629	31.6558	5.7715	NA	2.88575	4.32862	-27.3215	20.7249	-12.7678	0.000210075	0.00377476	0.322132
Supt16	Non-matrisome	Non-matrisome	21.512	21.8492	24.6251	22.6621	5.7715	2.88575	8.65725	5.7715	-16.8906	14.2168	-9.49511	0.000214034	0.00378285	0.907062
Ruvbl1	Non-matrisome	Non-matrisome	23.6107	25.5595	23.8555	24.3419	5.7715	NA	1.44287	3.60719	-20.7372	16.048	-12.7077	0.000214016	0.00378285	0.315532
Elp1	Non-matrisome	Non-matrisome	17.8392	16.9022	21.5469	18.7628	5.7715	2.88575	4.32862	4.32862	-14.4342	11.5457	-9.47143	0.000216611	0.00380025	0.899626
Numa1	Non-matrisome	Non-matrisome	60.3384	81.2132	85.0334	75.5284	5.7715	1.44287	11.543	6.25246	-69.2759	40.8904	-9.41462	0.000222945	0.00388283	0.881654
Snrnp200	Non-matrisome	Non-matrisome	71.8814	53.1802	56.1759	60.4125	5.7715	12.9859	7.21437	8.65725	-51.7553	34.5349	-9.31363	0.000234759	0.00405895	0.849218
Atp5po	Non-matrisome	Non-matrisome	15.7405	17.3145	18.084	17.0463	5.7715	NA	5.7715	5.7715	-11.2754	12.5364	-12.3051	0.000242937	0.00414293	0.269353
Hsd17b10	Non-matrisome	Non-matrisome	24.1354	19.788	18.084	20.6691	5.7715	4.32862	4.32862	4.80958	-15.8595	12.7394	-9.24341	0.000243414	0.00414293	0.826294
Epb41l3	Non-matrisome	Non-matrisome	13.117	15.6655	15.0059	14.5961	5.7715	2.88575	2.88575	3.84767	-10.7485	9.22191	-9.21861	0.000246561	0.00414293	0.818122
Epb41l3	Non-matrisome	Non-matrisome	13.117	15.6655	15.0059	14.5961	5.7715	2.88575	2.88575	3.84767	-10.7485	9.22191	-9.21861	0.000246561	0.00414293	0.818122
Pck2	Non-matrisome	Non-matrisome	15.2158	19.3757	15.7754	16.789	5.7715	4.32862	4.32862	4.80958	-11.9794	10.7993	-9.19062	0.000250171	0.00417419	0.808853
Eftud2	Non-matrisome	Non-matrisome	44.0733	50.2945	58.4845	50.9508	5.7715	4.32862	14.4287	8.17629	-42.7745	29.5635	-9.09622	0.000262819	0.00435476	0.777228
Eif4a2	Non-matrisome	Non-matrisome	89.7206	75.4417	63.1017	76.088	5.7715	2.88575	14.4287	7.69533	-68.3927	41.8917	-9.06121	0.000267702	0.00437491	0.76535
Sptb	Non-matrisome	Non-matrisome	13.117	11.9552	13.4668	12.8464	5.7715	2.88575	4.32862	4.32862	-8.51775	8.5875	-9.07318	0.00026602	0.00437491	0.769421
Sfpq	Non-matrisome	Non-matrisome	56.1409	45.3475	54.6369	52.0418	5.7715	4.32862	17.3145	9.13821	-42.9036	30.59	-8.98168	0.000279201	0.00453179	0.738072
Tcerg1	Non-matrisome	Non-matrisome	34.1043	29.682	23.8555	29.2139	5.7715	2.88575	4.32862	4.32862	-24.8853	16.7713	-8.9309	0.000286849	0.00462448	0.720437
Sf3b2	Non-matrisome	Non-matrisome	34.1043	32.1555	29.627	31.9623	5.7715	NA	10.1001	7.93581	-24.0269	22.3517	-11.6198	0.000304295	0.00465415	0.182192
Myl12a	Non-matrisome	Non-matrisome	22.0366	22.6737	25.7794	23.4966	5.7715	NA	7.21437	6.49294	-17.002	16.6951	-11.6348	0.000302753	0.00465415	0.184232
Ncapd2	Non-matrisome	Non-matrisome	28.3328	29.682	27.7032	28.5727	5.7715	NA	NA	5.7715	-22.8021	22.8724	-19.0779	0.000301054	0.00465415	-1.09149
Snx1	Non-matrisome	Non-matrisome	14.6911	18.9635	15.7754	16.4767	5.7715	5.7715	5.7715	5.7715	-10.7052	11.1241	-8.82204	0.000304104	0.00465415	0.682038
Atl3	Non-matrisome	Non-matrisome	13.6417	14.4287	13.0821	13.7175	5.7715	2.88575	5.7715	4.80958	-8.90793	9.26355	-8.8314	0.000302573	0.00465415	0.68537
Cdc37	Non-matrisome	Non-matrisome	16.7898	22.6737	19.6231	19.6956	5.7715	2.88575	4.32862	4.32862	-15.3669	12.0121	-8.85437	0.000298854	0.00465415	0.693525
Ddx21	Non-matrisome	Non-matrisome	18.8885	21.0247	15.7754	18.5629	5.7715	2.88575	2.88575	3.84767	-14.7152	11.2053	-8.86329	0.000297424	0.00465415	0.696684
Scfd1	Non-matrisome	Non-matrisome	15.7405	18.5512	19.6231	17.9716	5.7715	1.44287	1.44287	2.88575	-15.0859	10.4287	-8.88288	0.000294313	0.00465415	0.703598
Suclg1	Non-matrisome	Non-matrisome	13.117	13.6042	11.1582	12.6265	5.7715	4.32862	4.32862	4.80958	-7.81693	8.71805	-8.79365	0.000308804	0.00469304	0.67189
Cap1	Non-matrisome	Non-matrisome	26.2341	22.6737	19.2383	22.7154	5.7715	2.88575	5.7715	4.80958	-17.9058	13.7625	-8.77899	0.000311265	0.0047005	0.666628
Ubr4	Non-matrisome	Non-matrisome	21.512	22.2615	17.6993	20.4909	5.7715	5.7715	1.44287	4.32862	-16.1623	12.4098	-8.72503	0.000320529	0.00480995	0.647126
Ndufs1	Non-matrisome	Non-matrisome	25.7094	36.278	28.4727	30.1534	5.7715	1.44287	1.44287	2.88575	-27.2676	16.5196	-8.70523	0.000324008	0.00483178	0.639921
Erlin2	Non-matrisome	Non-matrisome	21.512	22.6737	25.3946	23.1934	5.7715	NA	2.88575	4.32862	-18.8638	15.6475	-11.3646	0.000331981	0.00491991	0.146687
Etf1	Non-matrisome	Non-matrisome	13.6417	15.2532	14.2364	14.3771	5.7715	1.44287	2.88575	3.36671	-11.0104	8.87191	-8.63448	0.000336818	0.00496079	0.613941
Igf2bp2	Non-matrisome	Non-matrisome	32.0056	26.7962	31.1661	29.9893	NA	1.44287	5.7715	3.60719	-26.3862	19.4365	-11.2862	0.000341118	0.0049933	0.135407
Sptbn2	Non-matrisome	Non-matrisome	27.2835	23.4982	26.5489	25.7769	5.7715	NA	1.44287	3.60719	-22.1651	16.909	-11.2613	0.000344081	0.00500595	0.131793
Nap1l1	Non-matrisome	Non-matrisome	26.7588	20.6125	21.9317	23.101	5.7715	7.21437	8.65725	7.21437	-15.8866	15.1577	-8.49617	0.000363639	0.00507593	0.562105
Xpo1	Non-matrisome	Non-matrisome	36.203	42.874	45.7872	41.6214	5.7715	NA	5.7715	5.7715	-35.8524	27.2815	-11.1762	0.000354455	0.00507593	0.119303
Fubp3	Non-matrisome	Non-matrisome	20.9873	24.735	25.3946	23.7056	NA	5.7715	5.7715	5.7715	-17.9286	16.532	-11.1251	0.000360881	0.00507593	0.111689
Sh3gl1	Non-matrisome	Non-matrisome	12.5924	15.6655	14.2364	14.1647	5.7715	4.32862	2.88575	4.32862	-9.83612	9.24668	-8.49547	0.000363782	0.00507593	0.561836
Pfkl	Non-matrisome	Non-matrisome	16.7898	18.5512	17.6993	17.6801	5.7715	NA	2.88575	4.32862	-13.3532	12.3395	-11.1557	0.000357012	0.00507593	0.116261
Gmps	Non-matrisome	Non-matrisome	22.0366	24.3227	21.9317	22.7637	5.7715	NA	1.44287	3.60719	-19.1596	15.1011	-11.1457	0.000358267	0.00507593	0.114775
Nup205	Non-matrisome	Non-matrisome	21.512	22.6737	24.2403	22.8087	5.7715	NA	1.44287	3.60719	-19.2012	15.1281	-11.1509	0.000357613	0.00507593	0.11555
36951	Non-matrisome	Non-matrisome	19.9379	27.2085	27.7032	24.9499	5.7715	1.44287	2.88575	3.36671	-21.5832	14.1583	-8.48342	0.000366237	0.00508047	0.557255
Golgb1	Non-matrisome	Non-matrisome	36.203	54.417	50.0197	46.8799	5.7715	2.88575	5.7715	4.80958	-42.0703	25.8447	-8.4213	0.000379214	0.00523009	0.533453
Fasn	Non-matrisome	Non-matrisome	83.9491	91.9317	82.7248	86.2019	5.7715	18.7574	34.629	19.7193	-66.4826	52.9606	-8.41053	0.00038152	0.00523165	0.529294
Rcn2	Non-matrisome	Non-matrisome	24.1354	24.735	20.3926	23.0877	NA	1.44287	4.32862	2.88575	-20.204	15.0069	-10.9481	0.000384257	0.00523907	0.0847439
Ddx39a	Non-matrisome	Non-matrisome	32.5303	27.2085	28.8575	29.5321	5.7715	NA	8.65725	7.21437	-22.313	20.605	-10.8989	0.000391082	0.00530182	0.077089
Tjp1	Non-matrisome	Non-matrisome	21.512	15.6655	19.6231	18.9335	5.7715	2.88575	2.88575	3.84767	-15.0859	11.3906	-8.33117	0.000399029	0.00535854	0.498393
Hk2	Non-matrisome	Non-matrisome	14.1664	14.0165	14.2364	14.1398	5.7715	1.44287	1.44287	2.88575	-11.254	8.51275	-8.32796	0.000399757	0.00535854	0.497133
Rpl15	Non-matrisome	Non-matrisome	15.7405	15.6655	15.3907	15.5989	5.7715	8.65725	8.65725	7.69533	-7.90354	11.6471	-8.30256	0.000405574	0.00540614	0.487133
Lmnb2	Non-matrisome	Non-matrisome	28.3328	32.1555	35.3985	31.9623	5.7715	NA	7.21437	6.49294	-25.4697	21.7745	-10.6907	0.000421718	0.00558448	0.0438049
Slc3a2	Non-matrisome	Non-matrisome	16.7898	14.0165	15.3907	15.399	5.7715	1.44287	4.32862	3.84767	-11.5513	9.62333	-8.22637	0.000423634	0.00558448	0.456836
Eif4a1	Non-matrisome	Non-matrisome	125.924	124.912	108.889	119.908	5.7715	17.3145	46.172	23.086	-96.8221	71.4971	-8.19649	0.000430975	0.00565003	0.444832
Csde1	Non-matrisome	Non-matrisome	20.9873	17.3145	17.3145	18.5388	5.7715	5.7715	1.44287	4.32862	-14.2101	11.4337	-8.16736	0.000438279	0.00570069	0.433058
Smarce1	Non-matrisome	Non-matrisome	16.2651	22.2615	19.6231	19.3832	5.7715	2.88575	1.44287	3.36671	-16.0165	11.375	-8.16209	0.000439617	0.00570069	0.430919
Gtf2i	Non-matrisome	Non-matrisome	35.1537	44.523	43.4786	41.0518	5.7715	NA	5.7715	5.7715	-35.2873	26.9397	-10.5368	0.000446282	0.00572489	0.0182965
Suclg2	Non-matrisome	Non-matrisome	18.8885	23.4982	20.7774	21.0547	5.7715	1.44287	7.21437	4.80958	-16.2451	12.9322	-8.14028	0.000445202	0.00572489	0.422049
Sptbn1	Non-matrisome	Non-matrisome	124.35	154.594	146.596	141.846	5.7715	28.8575	50.5006	28.3765	-113.47	85.1115	-8.03205	0.000474194	0.00605041	0.377463
Lmnb1	Non-matrisome	Non-matrisome	136.417	171.908	170.836	159.721	5.7715	8.65725	53.3864	22.605	-137.116	91.1628	-7.92381	0.000505456	0.00634747	0.331901
Uggt1	Non-matrisome	Non-matrisome	37.2524	39.9882	32.7052	36.6486	5.7715	2.88575	14.4287	7.69533	-28.9533	22.172	-7.92731	0.000504408	0.00634747	0.333389
Mthfd1l	Non-matrisome	Non-matrisome	19.9379	18.9635	20.7774	19.8929	5.7715	NA	1.44287	3.60719	-16.2839	13.3786	-10.2279	0.000501205	0.00634747	-0.0354143
Ndufa9	Non-matrisome	Non-matrisome	20.9873	22.2615	22.3165	21.8551	5.7715	NA	NA	5.7715	-16.0871	17.8342	-15.8957	0.000520222	0.00642364	-1.15897
Lrrc59	Non-matrisome	Non-matrisome	12.0677	15.2532	15.0059	14.1089	5.7715	2.88575	4.32862	4.32862	-9.78032	9.21878	-7.86876	0.000522291	0.00642364	0.308347
Rab5c	Non-matrisome	Non-matrisome	13.117	15.2532	15.0059	14.4587	5.7715	1.44287	4.32862	3.84767	-10.6111	9.1532	-7.88254	0.000518014	0.00642364	0.314269
Atxn10	Non-matrisome	Non-matrisome	17.3145	24.735	21.9317	21.3271	5.7715	1.44287	2.88575	3.36671	-17.9604	12.3469	-7.89277	0.000514869	0.00642364	0.31865
Rcn3	Non-matrisome	Non-matrisome	13.117	14.0165	14.6211	13.9182	5.7715	1.44287	1.44287	2.88575	-11.0325	8.40199	-7.85701	0.000525969	0.0064357	0.303288
Dnmt3a	Non-matrisome	Non-matrisome	30.4315	27.6207	30.7813	29.6112	NA	NA	1.44287	1.44287	-28.1636	22.5691	-15.788	0.00053091	0.00646301	-1.16193
Ahctf1	Non-matrisome	Non-matrisome	14.6911	17.3145	19.2383	17.0813	NA	1.44287	1.44287	1.44287	-15.6336	10.8259	-10.0627	0.000534027	0.00646796	-0.0655797
Rpn1	Non-matrisome	Non-matrisome	54.0422	61.013	52.3283	55.7945	5.7715	5.7715	23.086	11.543	-44.2515	33.6687	-7.77703	0.000551846	0.00664775	0.268516
Eif4g3	Non-matrisome	Non-matrisome	13.117	14.0165	12.3125	13.1487	5.7715	NA	5.7715	5.7715	-7.37894	10.1978	-9.96615	0.000554444	0.00664775	-0.0836943
Apoa1	Non-matrisome	Non-matrisome	19.9379	16.49	17.3145	17.9141	5.7715	8.65725	8.65725	7.69533	-10.2188	12.8047	-7.71242	0.000573853	0.00684606	0.240023
Myh10	Non-matrisome	Non-matrisome	175.244	226.737	224.704	208.895	5.7715	12.9859	69.258	29.3385	-179.557	119.117	-7.65497	0.000594303	0.00697108	0.214368
Atp2a2	Non-matrisome	Non-matrisome	43.0239	62.662	55.7912	53.8257	5.7715	11.543	14.4287	10.5811	-43.2446	32.2034	-7.65804	0.000593189	0.00697108	0.215747
Nefm	Non-matrisome	Non-matrisome	24.1354	17.7267	20.3926	20.7516	5.7715	1.44287	5.7715	4.32862	-16.423	12.5401	-7.65731	0.000593452	0.00697108	0.215422
Maged2	Non-matrisome	Non-matrisome	7.87023	9.0695	7.69533	8.21169	NA	1.44287	1.44287	1.44287	-6.76812	5.50416	-9.78253	0.000596018	0.00697108	-0.119179
Smc4	Non-matrisome	Non-matrisome	17.3145	17.3145	16.9297	17.1862	5.7715	NA	NA	5.7715	-11.4142	14.3326	-15.1582	0.000599658	0.00697943	-1.18038
Adnp	Non-matrisome	Non-matrisome	16.7898	12.3675	14.6211	14.5928	5.7715	4.32862	4.32862	4.80958	-9.78323	9.7012	-7.61713	0.000608242	0.00704498	0.197312
Supt6h	Non-matrisome	Non-matrisome	25.1847	23.086	24.2403	24.1703	5.7715	NA	NA	5.7715	-18.3948	19.5706	-15.01	0.000617529	0.00711799	-1.18503
Cdc5l	Non-matrisome	Non-matrisome	20.9873	24.735	25.0098	23.5774	5.7715	1.44287	NA	3.60719	-19.9731	15.5893	-9.65123	0.000628135	0.00719707	-0.145411
Top2a	Non-matrisome	Non-matrisome	38.8265	42.874	43.8634	41.8546	NA	NA	2.88575	2.88575	-38.9608	32.1124	-14.9066	0.000630422	0.00719707	-1.18835
Eif2s1	Non-matrisome	Non-matrisome	30.4315	34.629	32.7052	32.5886	5.7715	2.88575	14.4287	7.69533	-24.8932	20.142	-7.52267	0.000644772	0.00722265	0.154152
Cgn	Non-matrisome	Non-matrisome	19.9379	19.3757	NA	19.6568	5.7715	7.21437	NA	6.49294	-13.1639	13.0749	-14.8101	0.000642781	0.00722265	-0.872085
Psmd3	Non-matrisome	Non-matrisome	27.2835	42.4617	36.1681	35.3044	5.7715	2.88575	5.7715	4.80958	-30.4948	20.057	-7.5348	0.000639938	0.00722265	0.159741
Hip1r	Non-matrisome	Non-matrisome	13.6417	18.139	16.1602	15.9803	5.7715	2.88575	1.44287	3.36671	-12.6136	9.67351	-7.53856	0.000638449	0.00722265	0.161469
Snrpb	Non-matrisome	Non-matrisome	13.6417	18.139	16.9297	16.2368	5.7715	7.21437	5.7715	6.25246	-9.98436	11.2446	-7.46358	0.000668941	0.00745838	0.126735
Ndufs3	Non-matrisome	Non-matrisome	13.117	11.9552	12.6973	12.5899	5.7715	1.44287	2.88575	3.36671	-9.22316	7.97829	-7.41414	0.000689994	0.00762188	0.103539
Hmgb2	Non-matrisome	Non-matrisome	30.4315	29.682	32.3204	30.8113	5.7715	15.8716	10.1001	10.5811	-20.2302	20.6962	-7.39163	0.000699837	0.00769498	0.0929024
Eif3a	Non-matrisome	Non-matrisome	42.4992	66.7845	63.8713	57.7183	5.7715	5.7715	8.65725	6.73342	-50.9849	32.2259	-7.3747	0.000707349	0.0077419	0.0848713
Rpn2	Non-matrisome	Non-matrisome	43.5486	48.2332	47.3263	46.3694	5.7715	7.21437	21.6431	11.543	-34.8264	28.9562	-7.36511	0.000711651	0.00775342	0.0803051
Ndufs2	Non-matrisome	Non-matrisome	16.2651	22.6737	19.2383	19.3924	5.7715	4.32862	7.21437	5.7715	-13.6209	12.582	-7.33388	0.000725863	0.00777737	0.0653877
Clpx	Non-matrisome	Non-matrisome	12.5924	16.9022	14.2364	14.577	5.7715	5.7715	4.32862	5.29054	-9.28645	9.93377	-7.33166	0.000726887	0.00777737	0.0643223
Smc3	Non-matrisome	Non-matrisome	37.7771	50.7067	44.6329	44.3723	5.7715	NA	4.32862	5.05006	-39.335	28.6434	-9.30618	0.000723368	0.00777737	-0.217964
Kif5b	Non-matrisome	Non-matrisome	29.3822	28.8575	36.5528	31.5975	5.7715	NA	4.32862	5.05006	-26.5419	20.9785	-9.29987	0.000725269	0.00777737	-0.21934
Slc25a3	Non-matrisome	Non-matrisome	29.3822	26.7962	26.9337	27.704	5.7715	NA	NA	5.7715	-21.9258	22.2209	-14.1584	0.000735257	0.0078318	-1.21435
Nucb1	Non-matrisome	Non-matrisome	32.0056	45.3475	36.9376	38.0969	5.7715	1.44287	11.543	6.25246	-31.8444	22.1747	-7.28735	0.000747672	0.00792864	0.0429792
Immt	Non-matrisome	Non-matrisome	37.7771	50.2945	44.6329	44.2348	5.7715	NA	7.21437	6.49294	-37.7541	29.1381	-9.20584	0.000754367	0.00796425	-0.240095
Septin11	Non-matrisome	Non-matrisome	16.7898	23.4982	20.3926	20.2269	5.7715	1.44287	5.7715	4.32862	-15.8983	12.2778	-7.24712	0.000767148	0.00806351	0.0234394
Aldoa	Non-matrisome	Non-matrisome	31.4809	27.6207	25.0098	28.0372	5.7715	10.1001	12.9859	9.61917	-18.418	18.8282	-7.23912	0.000771097	0.00806946	0.0195303
Tagln2	Non-matrisome	Non-matrisome	14.1664	17.3145	15.7754	15.7521	5.7715	5.7715	8.65725	6.73342	-9.0187	11.2428	-7.22463	0.000778303	0.00807405	0.0124412
Ap2a2	Non-matrisome	Non-matrisome	22.0366	28.4452	24.6251	25.0356	5.7715	NA	4.32862	5.05006	-19.9925	17.0414	-9.14038	0.00077548	0.00807405	-0.254795
Nsfl1c	Non-matrisome	Non-matrisome	19.9379	20.2002	17.6993	19.2791	5.7715	4.32862	10.1001	6.73342	-12.5457	13.0063	-7.17469	0.000803756	0.008302	-0.0121526
Tmod3	Non-matrisome	Non-matrisome	12.0677	11.9552	13.4668	12.4966	5.7715	2.88575	1.44287	3.36671	-9.12988	7.93165	-7.13168	0.000826473	0.00849985	-0.0335389
Pdcd6ip	Non-matrisome	Non-matrisome	19.9379	28.4452	27.3184	25.2339	5.7715	1.44287	7.21437	4.80958	-20.4243	15.0217	-7.11348	0.000836316	0.00856417	-0.042647
Golga4	Non-matrisome	Non-matrisome	12.0677	14.0165	14.2364	13.4402	5.7715	1.44287	4.32862	3.84767	-9.59252	8.64392	-7.09369	0.000847176	0.0086383	-0.0525885
Snrpa	Non-matrisome	Non-matrisome	39.8758	28.8575	33.0899	33.9411	5.7715	12.9859	10.1001	9.61917	-24.3219	21.7801	-7.06065	0.00086568	0.00873437	-0.069276
Tollip	Non-matrisome	Non-matrisome	1.57405	2.4735	1.53907	1.8622	NA	7.21437	7.21437	7.21437	5.35275	4.00307	8.8893	0.000863573	0.00873437	-0.313171
Sqor	Non-matrisome	Non-matrisome	1.04936	1.23675	1.1543	1.1468	5.7715	4.32862	5.7715	5.29054	4.14374	3.21867	7.0573	0.00086758	0.00873437	-0.0709718
Septin7	Non-matrisome	Non-matrisome	14.6911	11.1307	12.6973	12.8397	5.7715	5.7715	5.7715	5.7715	-7.06821	9.30561	-7.04549	0.000874327	0.00876531	-0.0769676
Larp1	Non-matrisome	Non-matrisome	24.1354	16.0777	19.6231	19.9454	5.7715	2.88575	2.88575	3.84767	-16.0977	11.8965	-7.01979	0.000889223	0.00887735	-0.0900647
Naca	Non-matrisome	Non-matrisome	17.8392	12.7797	15.3907	15.3365	5.7715	4.32862	5.7715	5.29054	-10.046	10.3135	-7.01089	0.00089445	0.00888307	-0.0946153
Eppk1	Non-matrisome	Non-matrisome	22.0366	27.6207	27.3184	25.6586	5.7715	NA	1.44287	3.60719	-22.0554	16.838	-8.80158	0.000897242	0.00888307	-0.334337
Rack1	Non-matrisome	Non-matrisome	40.4005	53.5925	54.6369	49.5433	5.7715	5.7715	18.7574	10.1001	-39.4432	29.8217	-6.97242	0.000917479	0.00900866	-0.114391
Rab7a	Non-matrisome	Non-matrisome	22.0366	19.788	18.084	19.9696	5.7715	4.32862	10.1001	6.73342	-13.2361	13.3515	-6.97399	0.000916524	0.00900866	-0.113579
Dhx15	Non-matrisome	Non-matrisome	39.3511	35.8657	35.3985	36.8718	5.7715	17.3145	15.8716	12.9859	-23.8859	24.9288	-6.91877	0.000950766	0.00902127	-0.142224
Cct3	Non-matrisome	Non-matrisome	48.2707	65.5477	56.5607	56.7931	5.7715	4.32862	21.6431	10.5811	-46.212	33.6871	-6.91558	0.000952791	0.00902127	-0.14389
Lrp1	Non-matrisome	Non-matrisome	28.8575	32.5677	30.0118	30.479	5.7715	14.4287	2.88575	7.69533	-22.7837	19.0872	-6.9456	0.000933943	0.00902127	-0.128265
Pebp1	Non-matrisome	Non-matrisome	16.2651	19.788	16.545	17.5327	5.7715	NA	5.7715	5.7715	-11.7657	12.8282	-8.67079	0.000950524	0.00902127	-0.366671
Snx2	Non-matrisome	Non-matrisome	11.543	15.6655	15.7754	14.328	5.7715	4.32862	4.32862	4.80958	-9.51839	9.56878	-6.92379	0.000947591	0.00902127	-0.139606
Hip1	Non-matrisome	Non-matrisome	12.5924	14.0165	16.1602	14.2564	5.7715	1.44287	1.44287	2.88575	-11.3706	8.57105	-6.95236	0.000929761	0.00902127	-0.124761
Cul4a	Non-matrisome	Non-matrisome	12.0677	10.3062	10.0039	10.7926	NA	1.44287	2.88575	2.16431	-8.63088	7.3413	-8.72335	0.000928653	0.00902127	-0.353564
Cfl1	Non-matrisome	Non-matrisome	44.598	48.6455	33.8595	42.3676	5.7715	2.88575	14.4287	7.69533	-34.6723	25.0315	-6.90056	0.000962387	0.00904027	-0.151741
Rpl11	Non-matrisome	Non-matrisome	27.2835	19.3757	21.9317	22.8636	5.7715	4.32862	8.65725	6.25246	-16.6112	14.558	-6.89939	0.000963139	0.00904027	-0.152353
Acaa1a	Non-matrisome	Non-matrisome	22.0366	24.735	21.9317	22.9011	NA	NA	1.44287	1.44287	-21.4621	17.5366	-12.9193	0.000966164	0.00904027	-1.26649
Nup155	Non-matrisome	Non-matrisome	26.7588	24.735	27.7032	26.399	5.7715	NA	NA	5.7715	-20.626	21.2421	-12.8911	0.000972457	0.0090636	-1.26783
Cct7	Non-matrisome	Non-matrisome	67.6839	77.0907	57.715	67.4966	5.7715	11.543	27.4146	14.9097	-52.5869	41.2031	-6.87502	0.000978972	0.00908882	-0.16515
Cct6a	Non-matrisome	Non-matrisome	40.9252	54.417	53.0978	49.48	5.7715	11.543	20.2002	12.5049	-36.9751	30.9925	-6.85958	0.000989163	0.00912536	-0.173291
Nop56	Non-matrisome	Non-matrisome	27.2835	21.8492	22.3165	23.8164	5.7715	5.7715	11.543	7.69533	-16.1211	15.7559	-6.85748	0.000990557	0.00912536	-0.174399
Bag6	Non-matrisome	Non-matrisome	23.6107	18.5512	20.7774	20.9798	5.7715	NA	2.88575	4.32862	-16.6463	14.3193	-8.54551	0.00100528	0.00922537	-0.398537
Snrnp70	Non-matrisome	Non-matrisome	11.0183	10.7185	13.4668	11.7345	5.7715	5.7715	5.7715	5.7715	-5.96305	8.75302	-6.8242	0.00101299	0.00926052	-0.192044
Txnrd1	Non-matrisome	Non-matrisome	13.6417	13.192	14.2364	13.69	5.7715	7.21437	2.88575	5.29054	-8.39949	9.49029	-6.80543	0.0010259	0.00930724	-0.202046
Slc25a12	Non-matrisome	Non-matrisome	12.0677	12.3675	11.1582	11.8645	5.7715	1.44287	2.88575	3.36671	-8.49776	7.61559	-6.80757	0.00102442	0.00930724	-0.200906
Nup93	Non-matrisome	Non-matrisome	24.1354	30.0942	32.3204	28.85	5.7715	NA	4.32862	5.05006	-23.8024	19.33	-8.466	0.00104206	0.00940988	-0.41923
Acsf2	Non-matrisome	Non-matrisome	19.9379	20.2002	22.3165	20.8182	NA	NA	2.88575	2.88575	-17.9264	16.3351	-12.5829	0.0010451	0.00940988	-1.28302
Parp1	Non-matrisome	Non-matrisome	44.0733	70.4947	69.6428	61.4036	5.7715	4.32862	11.543	7.21437	-54.1892	34.309	-6.76399	0.00105511	0.00946428	-0.224269
Cd82	Non-matrisome	Non-matrisome	1.57405	1.649	1.53907	1.58737	5.7715	5.7715	NA	5.7715	4.18423	3.26102	8.41635	0.00106588	0.0094895	-0.432341
Farp1	Non-matrisome	Non-matrisome	16.7898	13.192	13.0821	14.3546	5.7715	1.44287	2.88575	3.36671	-10.9879	8.86067	-6.75166	0.001064	0.0094895	-0.23092
Psmd13	Non-matrisome	Non-matrisome	26.2341	21.0247	21.9317	23.0635	5.7715	NA	1.44287	3.60719	-19.4522	15.281	-8.34525	0.00110117	0.00976723	-0.451372
Rcn1	Non-matrisome	Non-matrisome	18.3639	18.5512	22.3165	19.7439	5.7715	NA	7.21437	6.49294	-13.2485	14.4435	-8.31903	0.00111455	0.00984931	-0.45847
Fscn1	Non-matrisome	Non-matrisome	13.117	11.543	11.9278	12.1959	5.7715	NA	4.32862	5.05006	-7.14456	9.33759	-8.28286	0.00113333	0.00997833	-0.468325
Hspd1	Non-matrisome	Non-matrisome	290.149	331.449	292.807	304.802	5.7715	103.887	121.201	76.9533	-227.848	190.878	-6.6412	0.00114761	0.0100669	-0.291245
Eif3c	Non-matrisome	Non-matrisome	36.7277	33.3922	36.1681	35.4293	5.7715	17.3145	15.8716	12.9859	-22.4435	24.2076	-6.60765	0.00117453	0.0101404	-0.309843
Ga0b	Non-matrisome	Non-matrisome	38.8265	49.47	42.3243	43.5403	5.7715	11.543	20.2002	12.5049	-31.0353	28.0226	-6.60432	0.00117724	0.0101404	-0.311696
Ide	Non-matrisome	Non-matrisome	11.543	9.894	10.7735	10.7368	5.7715	2.88575	2.88575	3.84767	-6.88915	7.29224	-6.6242	0.00116116	0.0101404	-0.300653
Edc4	Non-matrisome	Non-matrisome	19.4132	25.1472	18.4688	21.0098	NA	1.44287	1.44287	1.44287	-19.5637	13.183	-8.20805	0.00117344	0.0101404	-0.488972
Rsf1	Non-matrisome	Non-matrisome	14.6911	10.7185	13.4668	12.9588	NA	1.44287	1.44287	1.44287	-11.5194	8.35243	-8.21135	0.00117164	0.0101404	-0.488055
Mapre1	Non-matrisome	Non-matrisome	12.5924	17.3145	15.0059	14.9709	5.7715	2.88575	5.7715	4.80958	-10.1613	9.89025	-6.59104	0.00118813	0.0101974	-0.319098
Macroh2a1	Non-matrisome	Non-matrisome	35.1537	32.5677	39.2462	35.6559	5.7715	NA	12.9859	9.37869	-26.271	25.145	-8.14507	0.00120858	0.0103358	-0.50663
Smarcc2	Non-matrisome	Non-matrisome	17.8392	13.6042	19.2383	16.8939	5.7715	5.7715	7.21437	6.25246	-10.6415	11.5732	-6.54867	0.00122368	0.0103904	-0.342852
Gatad2a	Non-matrisome	Non-matrisome	10.4936	11.1307	10.7735	10.7993	NA	1.44287	NA	1.44287	-9.35507	8.46018	-11.9424	0.00122074	0.0103904	-1.31788
Arcn1	Non-matrisome	Non-matrisome	26.7588	25.1472	21.9317	24.6126	5.7715	10.1001	12.9859	9.61917	-14.9934	17.1159	-6.53451	0.00123584	0.0104195	-0.350839
Psme1	Non-matrisome	Non-matrisome	13.6417	20.6125	18.4688	17.5743	5.7715	4.32862	2.88575	4.32862	-13.2457	10.9515	-6.53857	0.00123233	0.0104195	-0.348543
Pcyox1	Non-matrisome	Non-matrisome	19.4132	22.6737	19.2383	20.4418	5.7715	8.65725	NA	7.21437	-13.225	15.1508	-8.08169	0.00124527	0.0104253	-0.524656
Smc1a	Non-matrisome	Non-matrisome	33.5796	56.8905	54.2521	48.2407	5.7715	2.88575	5.7715	4.80958	-43.4312	26.5252	-6.5242	0.00124478	0.0104253	-0.356669
Hspa9	Non-matrisome	Non-matrisome	84.9984	131.508	126.203	114.237	5.7715	2.88575	31.7432	13.4668	-100.77	63.8517	-6.49662	0.00126908	0.0105875	-0.37232
Ptbp1	Non-matrisome	Non-matrisome	52.4682	37.1025	31.5509	40.3738	5.7715	1.44287	2.88575	3.36671	-37.0071	21.8703	-6.46197	0.0013004	0.0107992	-0.392113
Rpl30	Non-matrisome	Non-matrisome	9.44427	10.7185	10.3887	10.1838	5.7715	2.88575	4.32862	4.32862	-5.8552	7.25622	-6.43775	0.00132284	0.0109214	-0.406031
C1qbp	Non-matrisome	Non-matrisome	24.66	39.576	30.0118	31.4159	5.7715	4.32862	7.21437	5.7715	-25.6444	18.5937	-6.42698	0.00133296	0.010967	-0.412242
D0jc3	Non-matrisome	Non-matrisome	13.117	13.192	12.6973	13.0021	5.7715	1.44287	5.7715	4.32862	-8.67349	8.66537	-6.3929	0.0013656	0.011197	-0.431991
Rpl10a	Non-matrisome	Non-matrisome	40.4005	58.9517	57.715	52.3557	5.7715	5.7715	18.7574	10.1001	-42.2556	31.2279	-6.37754	0.00138063	0.0112047	-0.44094
Capza2	Non-matrisome	Non-matrisome	18.8885	21.0247	20.0079	19.9737	5.7715	NA	NA	5.7715	-14.2066	16.4232	-11.4685	0.00137671	0.0112047	-1.34694
Aldh5a1	Non-matrisome	Non-matrisome	11.0183	13.192	11.543	11.9178	5.7715	5.7715	2.88575	4.80958	-7.10819	8.36368	-6.37882	0.00137937	0.0112047	-0.440192
Plin3	Non-matrisome	Non-matrisome	15.2158	17.3145	18.4688	16.9997	5.7715	2.88575	8.65725	5.7715	-11.2282	11.3856	-6.37058	0.0013875	0.0112223	-0.445005
Psmc3	Non-matrisome	Non-matrisome	24.66	35.0412	38.8614	32.8542	5.7715	5.7715	10.1001	7.21437	-25.6399	20.0343	-6.3606	0.00139742	0.0112643	-0.45084
Iars1	Non-matrisome	Non-matrisome	38.8265	29.682	26.1641	31.5575	5.7715	1.44287	10.1001	5.7715	-25.786	18.6645	-6.34298	0.00141514	0.0113306	-0.461175
Glod4	Non-matrisome	Non-matrisome	9.96895	9.48175	8.84963	9.43345	5.7715	4.32862	5.7715	5.29054	-4.1429	7.36199	-6.3442	0.00141391	0.0113306	-0.460462
Zw10	Non-matrisome	Non-matrisome	10.4936	11.1307	10.3887	10.671	NA	NA	1.44287	1.44287	-9.22929	8.36399	-11.308	0.00143546	0.0114549	-1.35749
Hadhb	Non-matrisome	Non-matrisome	23.086	32.5677	25.7794	27.1444	5.7715	1.44287	10.1001	5.7715	-21.3729	16.4579	-6.30631	0.00145288	0.0115435	-0.482809
Map1b	Non-matrisome	Non-matrisome	14.6911	11.9552	11.9278	12.858	5.7715	1.44287	1.44287	2.88575	-9.97228	7.87189	-6.30311	0.00145624	0.0115435	-0.484705
G0s	Non-matrisome	Non-matrisome	12.5924	12.7797	17.3145	14.2289	5.7715	4.32862	4.32862	4.80958	-9.41929	9.51923	-6.28492	0.00147545	0.0115803	-0.495503
Hsd17b8	Non-matrisome	Non-matrisome	7.34554	6.18375	6.15627	6.56185	NA	1.44287	1.44287	1.44287	-5.12056	4.51426	-7.74075	0.00146804	0.0115803	-0.626249
Gls	Non-matrisome	Non-matrisome	5.7715	5.35925	6.15627	5.76234	NA	1.44287	1.44287	1.44287	-4.31948	4.03455	-7.73366	0.00147317	0.0115803	-0.628446
Ilf3	Non-matrisome	Non-matrisome	36.7277	41.6372	41.17	39.845	5.7715	4.32862	20.2002	10.1001	-29.7449	24.9726	-6.24727	0.00151617	0.0118222	-0.517984
Srp68	Non-matrisome	Non-matrisome	11.0183	12.3675	10.7735	11.3864	5.7715	1.44287	2.88575	3.36671	-8.01972	7.37657	-6.25012	0.00151304	0.0118222	-0.516274
Rap1b	Non-matrisome	Non-matrisome	13.117	16.49	15.3907	14.9992	5.7715	NA	4.32862	5.05006	-9.95218	11.0196	-7.65341	0.00153286	0.0119133	-0.653585
Dctn2	Non-matrisome	Non-matrisome	18.3639	30.5065	25.7794	24.8832	5.7715	1.44287	4.32862	3.84767	-21.0356	14.3655	-6.22664	0.00153904	0.0119226	-0.530376
Erp29	Non-matrisome	Non-matrisome	12.0677	14.0165	10.3887	12.1576	5.7715	4.32862	5.7715	5.29054	-6.86708	8.72408	-6.22105	0.0015453	0.0119324	-0.53374
Mcm4	Non-matrisome	Non-matrisome	32.5303	44.1107	39.2462	38.6291	5.7715	NA	10.1001	7.93581	-30.7043	26.3518	-7.60781	0.0015681	0.0119537	-0.66808
Psmb3	Non-matrisome	Non-matrisome	13.6417	16.9022	15.7754	15.4398	5.7715	8.65725	4.32862	6.25246	-9.18734	10.8461	-6.21142	0.00155617	0.0119537	-0.539549
Psmd7	Non-matrisome	Non-matrisome	12.5924	14.0165	14.2364	13.6151	NA	NA	1.44287	1.44287	-12.1697	10.572	-10.9784	0.00156699	0.0119537	-1.38038
Lamp2	Non-matrisome	Non-matrisome	2.09873	1.649	1.53907	1.76226	5.7715	8.65725	8.65725	7.69533	5.93307	4.7288	6.1857	0.00158565	0.0120146	-0.555126
Tnpo1	Non-matrisome	Non-matrisome	NA	14.0165	12.6973	13.3569	NA	4.32862	4.32862	4.32862	-9.02827	8.84276	-10.9334	0.00158617	0.0120146	-1.11491
Ap2a1	Non-matrisome	Non-matrisome	18.3639	17.3145	15.3907	17.023	5.7715	NA	1.44287	3.60719	-13.4164	11.6567	-7.5571	0.00160848	0.0121148	-0.684379
Sympk	Non-matrisome	Non-matrisome	14.6911	16.49	16.545	15.9087	5.7715	NA	1.44287	3.60719	-12.3027	10.9881	-7.55577	0.00160956	0.0121148	-0.684811
Rps3a	Non-matrisome	Non-matrisome	54.5669	78.3275	52.3283	61.7409	5.7715	8.65725	18.7574	11.062	-50.6788	36.4015	-6.15393	0.00162297	0.0121774	-0.574481
Sdha	Non-matrisome	Non-matrisome	37.2524	36.278	33.4747	35.6684	5.7715	4.32862	18.7574	9.61917	-26.0492	22.6438	-6.14192	0.00163734	0.012237	-0.581829
Pabpc4	Non-matrisome	Non-matrisome	29.3822	35.4535	33.8595	32.8984	5.7715	NA	12.9859	9.37869	-23.5248	23.4905	-7.511	0.00164631	0.012237	-0.699368
Rars1	Non-matrisome	Non-matrisome	16.2651	20.2002	23.8555	20.107	5.7715	5.7715	8.65725	6.73342	-13.3736	13.4202	-6.13554	0.00164505	0.012237	-0.585744
Ddx5	Non-matrisome	Non-matrisome	49.3201	78.7397	83.1096	70.3898	5.7715	1.44287	15.8716	7.69533	-62.6945	39.0426	-6.1209	0.00166287	0.0123217	-0.594737
Add3	Non-matrisome	Non-matrisome	14.6911	16.49	16.9297	16.0369	5.7715	NA	1.44287	3.60719	-12.4307	11.065	-7.4659	0.00168438	0.0124425	-0.714187
Gm20431	Non-matrisome	Non-matrisome	14.6911	11.9552	11.543	12.7298	5.7715	1.44287	1.44287	2.88575	-9.84403	7.80776	-6.09063	0.00170045	0.0125225	-0.613428
Tomm22	Non-matrisome	Non-matrisome	33.5796	24.3227	22.3165	26.7396	5.7715	8.65725	7.21437	7.21437	-19.5252	16.977	-6.07747	0.0017171	0.0126061	-0.621586
Pc0	Non-matrisome	Non-matrisome	20.4626	16.0777	13.8516	16.7973	5.7715	5.7715	2.88575	4.80958	-11.9877	10.8034	-6.05218	0.00174964	0.0127837	-0.637334
Sfxn1	Non-matrisome	Non-matrisome	11.543	16.0777	14.2364	13.9524	5.7715	5.7715	2.88575	4.80958	-9.14279	9.38098	-6.05037	0.00175199	0.0127837	-0.638464
Rnf20	Non-matrisome	Non-matrisome	13.117	10.3062	10.3887	11.2707	NA	2.88575	1.44287	2.16431	-9.11007	7.62812	-7.37253	0.00176672	0.0128518	-0.745369
Ppp1r7	Non-matrisome	Non-matrisome	11.0183	9.48175	9.61917	10.0397	NA	4.32862	2.88575	3.60719	-6.43453	7.46672	-7.36613	0.00177254	0.012855	-0.747531
Pcbp1	Non-matrisome	Non-matrisome	31.4809	44.1107	32.3204	35.9707	5.7715	4.32862	14.4287	8.17629	-27.7944	22.0735	-6.01351	0.0018008	0.0130203	-0.661571
Rps15	Non-matrisome	Non-matrisome	28.8575	28.8575	26.1641	27.9597	5.7715	5.7715	15.8716	9.13821	-18.8215	18.549	-5.99749	0.00182252	0.0131375	-0.671672
Smarca1	Non-matrisome	Non-matrisome	13.117	18.5512	20.7774	17.4819	5.7715	1.44287	2.88575	3.36671	-14.1152	10.4243	-5.97689	0.0018509	0.0133019	-0.684711
Ttc38	Non-matrisome	Non-matrisome	0.524682	0.8245	0.769533	0.706238	5.7715	4.32862	7.21437	5.7715	5.06526	3.23887	5.97246	0.00185707	0.0133062	-0.68752
Ppp4r2	Non-matrisome	Non-matrisome	14.1664	11.543	13.0821	12.9305	5.7715	NA	5.7715	5.7715	-7.15619	10.0669	-7.27001	0.00186292	0.0133082	-0.780404
Trim25	Non-matrisome	Non-matrisome	12.0677	10.7185	13.8516	12.2126	5.7715	5.7715	2.88575	4.80958	-7.40301	8.51109	-5.94436	0.00189676	0.0135095	-0.705408
Eif3i	Non-matrisome	Non-matrisome	19.4132	26.384	23.4708	23.0893	5.7715	NA	1.44287	3.60719	-19.4888	15.2965	-7.22289	0.00190932	0.0135182	-0.796797
Ubtf	Non-matrisome	Non-matrisome	15.2158	14.4287	13.0821	14.2422	NA	NA	1.44287	1.44287	-12.804	11.0424	-10.2696	0.00190904	0.0135182	-1.43593
Cdk1	Non-matrisome	Non-matrisome	21.512	21.437	18.8536	20.6008	NA	NA	4.32862	4.32862	-16.2793	16.5328	-10.1894	0.00195372	0.0137917	-1.44282
Erp44	Non-matrisome	Non-matrisome	13.117	13.6042	11.9278	12.883	5.7715	NA	2.88575	4.32862	-8.55585	9.46126	-7.16868	0.00196445	0.0138013	-0.81588
Cops4	Non-matrisome	Non-matrisome	13.117	21.0247	18.4688	17.5369	5.7715	1.44287	2.88575	3.36671	-14.1702	10.4518	-5.89654	0.00196665	0.0138013	-0.736099
Iars2	Non-matrisome	Non-matrisome	11.543	16.0777	13.4668	13.6959	5.7715	5.7715	2.88575	4.80958	-8.88628	9.25272	-5.88584	0.0019827	0.0138731	-0.743006
Rad21	Non-matrisome	Non-matrisome	17.8392	14.841	16.1602	16.2801	5.7715	1.44287	NA	3.60719	-12.6727	11.211	-7.14547	0.00198866	0.0138741	-0.824125
Ero1b	Non-matrisome	Non-matrisome	2.09873	1.23675	1.53907	1.62485	5.7715	4.32862	5.7715	5.29054	3.66569	3.45769	5.83893	0.0020549	0.0142529	-0.773478
Farsa	Non-matrisome	Non-matrisome	15.7405	19.3757	16.545	17.2204	5.7715	NA	1.44287	3.60719	-13.6175	11.7751	-7.07074	0.00206913	0.01431	-0.850982
Smarcd3	Non-matrisome	Non-matrisome	9.44427	9.894	10.3887	9.90899	NA	NA	1.44287	1.44287	-8.46418	7.79246	-9.96852	0.00208428	0.0143731	-1.4625
Krt8	Non-matrisome	Non-matrisome	81.8504	84.9235	76.1838	80.9859	5.7715	27.4146	41.8434	25.0098	-55.976	52.9979	-5.79866	0.00211937	0.0145479	-0.799876
Fam162a	Non-matrisome	Non-matrisome	11.0183	11.543	10.0039	10.8551	5.7715	7.21437	7.21437	6.73342	-4.12167	8.79425	-5.79715	0.00212182	0.0145479	-0.800868
Usp7	Non-matrisome	Non-matrisome	16.7898	14.4287	15.0059	15.4082	5.7715	1.44287	NA	3.60719	-11.8002	10.6878	-7.00962	0.00213796	0.0145748	-0.873308
Golga2	Non-matrisome	Non-matrisome	14.6911	22.6737	16.1602	17.8417	5.7715	1.44287	2.88575	3.36671	-14.475	10.6042	-5.79093	0.002132	0.0145748	-0.804965
Lonp1	Non-matrisome	Non-matrisome	22.0366	37.1025	35.0138	31.3843	5.7715	2.88575	8.65725	5.7715	-25.6128	18.5779	-5.70812	0.00227316	0.0154329	-0.860041
Map4	Non-matrisome	Non-matrisome	22.0366	39.1637	33.8595	31.6866	5.7715	5.7715	5.7715	5.7715	-25.9151	18.7291	-5.70244	0.00228323	0.0154329	-0.863854
Hmox2	Non-matrisome	Non-matrisome	13.117	16.9022	13.0821	14.3671	5.7715	1.44287	5.7715	4.32862	-10.0385	9.34787	-5.70512	0.00227846	0.0154329	-0.862051
Rpl12	Non-matrisome	Non-matrisome	19.9379	23.4982	25.0098	22.8153	5.7715	5.7715	12.9859	8.17629	-14.639	15.4958	-5.69489	0.00229671	0.0154801	-0.868929
Akap12	Non-matrisome	Non-matrisome	82.375	101.413	80.4162	88.0683	5.7715	21.6431	43.2862	23.567	-64.5013	55.8176	-5.64658	0.00238518	0.0158085	-0.90159
Sf3b3	Non-matrisome	Non-matrisome	57.1903	69.6702	65.4103	64.0903	5.7715	24.5289	31.7432	20.6812	-43.4091	42.3858	-5.65353	0.00237222	0.0158085	-0.896874
Rpl5	Non-matrisome	Non-matrisome	40.4005	61.013	60.4084	53.9406	5.7715	14.4287	20.2002	13.4668	-40.4738	33.7037	-5.66369	0.0023534	0.0158085	-0.889986
Rps6	Non-matrisome	Non-matrisome	38.3018	30.9187	29.627	32.9492	5.7715	10.1001	17.3145	11.062	-21.8871	22.0056	-5.64886	0.00238092	0.0158085	-0.900041
Puf60	Non-matrisome	Non-matrisome	26.2341	41.6372	36.1681	34.6798	5.7715	2.88575	12.9859	7.21437	-27.4654	20.9471	-5.65132	0.00237633	0.0158085	-0.898372
Ipo5	Non-matrisome	Non-matrisome	37.7771	32.1555	25.7794	31.904	5.7715	NA	4.32862	5.05006	-26.8544	21.1624	-6.82754	0.00236038	0.0158085	-0.941779
Timm44	Non-matrisome	Non-matrisome	13.117	15.2532	12.6973	13.6892	5.7715	NA	2.88575	4.32862	-9.36372	9.94497	-6.80237	0.00239332	0.0158185	-0.951479
Sf3a1	Non-matrisome	Non-matrisome	29.9069	47.821	50.0197	42.5825	5.7715	5.7715	12.9859	8.17629	-34.4062	25.3794	-5.63431	0.0024083	0.0158735	-0.909942
Fabp4	Non-matrisome	Non-matrisome	0.524682	1.23675	1.1543	0.971911	5.7715	10.1001	10.1001	8.65725	7.68534	4.81458	5.62731	0.00242158	0.0159171	-0.914709
Tubb3	Non-matrisome	Non-matrisome	94.9674	126.973	114.276	112.072	5.7715	25.9717	53.3864	28.3765	-83.6955	70.2243	-5.61591	0.00244344	0.0160166	-0.922501
Pitrm1	Non-matrisome	Non-matrisome	20.9873	34.629	31.1661	28.9275	5.7715	8.65725	8.65725	7.69533	-21.2321	18.3114	-5.6092	0.0024564	0.0160575	-0.927092
Atp2b1	Non-matrisome	Non-matrisome	16.2651	22.6737	14.6211	17.8533	5.7715	1.44287	4.32862	3.84767	-14.0057	10.8505	-5.59708	0.00248003	0.0161676	-0.935406
Lrpap1	Non-matrisome	Non-matrisome	13.117	16.0777	15.0059	14.7336	5.7715	1.44287	7.21437	4.80958	-9.92398	9.77157	-5.58623	0.0025014	0.0162625	-0.942862
Psmd6	Non-matrisome	Non-matrisome	22.0366	19.3757	14.2364	18.5496	5.7715	7.21437	7.21437	6.73342	-11.8162	12.6415	-5.55234	0.00256957	0.0166152	-0.966268
Stoml2	Non-matrisome	Non-matrisome	15.2158	19.3757	15.3907	16.6607	5.7715	NA	2.88575	4.32862	-12.3376	11.7279	-6.67606	0.00256749	0.0166152	-1.00106
Ssrp1	Non-matrisome	Non-matrisome	15.7405	11.543	11.1582	12.8139	5.7715	2.88575	2.88575	3.84767	-8.96623	8.33078	-5.52976	0.00261619	0.0168709	-0.981952
Napa	Non-matrisome	Non-matrisome	19.4132	27.6207	23.8555	23.6298	5.7715	NA	5.7715	5.7715	-17.8664	16.4865	-6.62669	0.00263978	0.0169353	-1.02086
Kif15	Non-matrisome	Non-matrisome	11.0183	10.7185	12.3125	11.3498	NA	NA	1.44287	1.44287	-9.90303	8.87306	-9.19905	0.00264037	0.0169353	-1.54006
Otub1	Non-matrisome	Non-matrisome	11.543	9.894	11.1582	10.8651	5.7715	NA	4.32862	5.05006	-5.81306	8.53907	-6.61361	0.00265934	0.016941	-1.02614
Idh3b	Non-matrisome	Non-matrisome	15.7405	21.437	20.7774	19.3183	5.7715	NA	2.88575	4.32862	-14.9939	13.3224	-6.61356	0.00265941	0.016941	-1.02616
Nsf	Non-matrisome	Non-matrisome	11.0183	15.6655	16.1602	14.2813	5.7715	1.44287	4.32862	3.84767	-10.4337	9.0645	-5.50777	0.00266256	0.016941	-0.997301
Oxct1	Non-matrisome	Non-matrisome	14.6911	11.9552	14.2364	13.6276	5.7715	NA	2.88575	4.32862	-9.29557	9.90799	-6.56072	0.00274032	0.0173865	-1.04768
Myo1b	Non-matrisome	Non-matrisome	20.4626	20.2002	23.8555	21.5061	NA	NA	2.88575	2.88575	-18.6109	16.851	-9.0757	0.00274715	0.0173865	-1.55395
Sf3b1	Non-matrisome	Non-matrisome	55.0916	82.0377	75.4143	70.8479	5.7715	25.9717	25.9717	19.2383	-51.6095	45.0431	-5.46055	0.00276541	0.0174557	-1.03049
Smc2	Non-matrisome	Non-matrisome	26.7588	38.3392	39.631	34.9097	5.7715	NA	1.44287	3.60719	-31.3094	22.3887	-6.52068	0.00280365	0.0175688	-1.06416
Mtrex	Non-matrisome	Non-matrisome	28.3328	19.788	16.545	21.5553	5.7715	1.44287	1.44287	2.88575	-18.6695	12.2205	-5.44873	0.00279189	0.0175688	-1.03886
Pcbp2	Non-matrisome	Non-matrisome	34.1043	36.278	24.2403	31.5409	5.7715	5.7715	14.4287	8.65725	-22.8836	20.0991	-5.4358	0.00282118	0.0176213	-1.04803
Ehd1	Non-matrisome	Non-matrisome	11.543	18.5512	18.084	16.0594	5.7715	1.44287	1.44287	2.88575	-13.1737	9.47259	-5.42585	0.00284397	0.0177173	-1.0551
Hp1bp3	Non-matrisome	Non-matrisome	14.6911	13.192	13.4668	13.7833	5.7715	NA	1.44287	3.60719	-10.1749	9.71286	-6.48148	0.00286741	0.0178168	-1.08046
Hnrnpu	Non-matrisome	Non-matrisome	45.6473	39.9882	51.5587	45.7314	5.7715	NA	17.3145	11.543	-34.1769	32.0561	-6.44826	0.00292282	0.0181139	-1.0944
Fubp1	Non-matrisome	Non-matrisome	31.4809	45.7597	44.6329	40.6245	5.7715	11.543	18.7574	12.024	-28.6006	26.3242	-5.37311	0.00296845	0.018349	-1.09284
Cdk4	Non-matrisome	Non-matrisome	12.0677	11.9552	10.3887	11.4705	NA	NA	1.44287	1.44287	-10.032	8.96363	-8.78667	0.00302068	0.0186236	-1.5883
Gstp1	Non-matrisome	Non-matrisome	14.1664	18.9635	15.7754	16.3018	5.7715	NA	5.7715	5.7715	-10.5356	12.0897	-6.38104	0.00303907	0.0186887	-1.12294
Copa	Non-matrisome	Non-matrisome	38.8265	37.927	35.3985	37.384	5.7715	20.2002	18.7574	14.9097	-22.4743	26.1468	-5.3244	0.0030891	0.0189476	-1.12807
Rpl9	Non-matrisome	Non-matrisome	NA	NA	25.3946	25.3946	5.7715	8.65725	4.32862	6.25246	-19.1344	11.038	-8.71031	0.00309891	0.018959	-1.59782
Eprs1	Non-matrisome	Non-matrisome	39.3511	65.5477	57.715	54.2046	5.7715	14.4287	18.7574	12.9859	-41.2188	33.5952	-5.31368	0.00311644	0.0190174	-1.13587
Pdhb	Non-matrisome	Non-matrisome	17.3145	25.5595	25.7794	22.8845	5.7715	8.65725	10.1001	8.17629	-14.7082	15.5304	-5.30696	0.00313369	0.0190449	-1.14077
Ckb	Non-matrisome	Non-matrisome	11.543	12.7797	10.3887	11.5705	5.7715	NA	5.7715	5.7715	-5.80142	9.25089	-6.32687	0.00313691	0.0190449	-1.14628
Nes	Non-matrisome	Non-matrisome	22.5613	19.788	13.8516	18.7336	5.7715	4.32862	7.21437	5.7715	-12.9621	12.2526	-5.29981	0.00315219	0.0190892	-1.14599
Naa15	Non-matrisome	Non-matrisome	19.9379	28.8575	23.4708	24.0887	5.7715	NA	1.44287	3.60719	-20.4911	15.8961	-6.30057	0.00318579	0.0192438	-1.15772
Impdh2	Non-matrisome	Non-matrisome	19.9379	27.2085	37.3224	28.1563	5.7715	2.88575	2.88575	3.84767	-24.3086	16.002	-5.28009	0.00320389	0.0193042	-1.16043
Dpp3	Non-matrisome	Non-matrisome	20.9873	15.6655	17.3145	17.9891	5.7715	NA	1.44287	3.60719	-14.3772	12.2363	-6.24721	0.00328791	0.0197606	-1.18117
Arpc2	Non-matrisome	Non-matrisome	12.5924	18.139	12.6973	14.4762	5.7715	1.44287	4.32862	3.84767	-10.6286	9.16194	-5.23524	0.00332515	0.0199342	-1.19348
Dcakd	Non-matrisome	Non-matrisome	22.5613	17.7267	13.8516	18.0466	5.7715	1.44287	5.7715	4.32862	-13.7179	11.1876	-5.22204	0.00336188	0.0201039	-1.20328
Xrcc5	Non-matrisome	Non-matrisome	12.5924	13.6042	13.0821	13.0929	5.7715	NA	NA	5.7715	-7.32341	11.2625	-8.45576	0.00337984	0.0201608	-1.63098
Por	Non-matrisome	Non-matrisome	14.1664	16.49	19.6231	16.7598	5.7715	4.32862	NA	5.05006	-11.7155	12.0759	-6.19216	0.0033975	0.0202155	-1.20568
Ruvbl2	Non-matrisome	Non-matrisome	25.7094	41.6372	35.7833	34.3766	5.7715	8.65725	14.4287	9.61917	-24.7575	21.9979	-5.19875	0.00342782	0.0203452	-1.22061
Vapa	Non-matrisome	Non-matrisome	16.7898	22.6737	24.2403	21.2346	5.7715	NA	2.88575	4.32862	-16.9089	14.4722	-6.16819	0.0034466	0.0204059	-1.21646
Letm1	Non-matrisome	Non-matrisome	11.0183	11.543	11.543	11.3681	5.7715	1.44287	5.7715	4.32862	-7.03948	7.84836	-5.18069	0.00348	0.0205527	-1.23412
Ncln	Non-matrisome	Non-matrisome	9.44427	13.6042	13.0821	12.0435	5.7715	1.44287	2.88575	3.36671	-8.67682	7.70512	-5.175	0.00349662	0.0205998	-1.23838
Eps15l1	Non-matrisome	Non-matrisome	22.5613	19.788	18.084	20.1444	NA	1.44287	NA	1.44287	-18.703	15.4691	-8.32576	0.00353634	0.0207825	-1.64881
Pigs	Non-matrisome	Non-matrisome	12.0677	12.7797	12.6973	12.5149	5.7715	NA	NA	5.7715	-6.74521	10.8291	-8.31743	0.0035467	0.0207922	-1.64997
Snrpa1	Non-matrisome	Non-matrisome	14.6911	18.5512	16.1602	16.4675	5.7715	4.32862	10.1001	6.73342	-9.7341	11.6005	-5.15174	0.00356557	0.0208516	-1.25586
Ugp2	Non-matrisome	Non-matrisome	12.0677	12.7797	12.3125	12.3867	5.7715	NA	NA	5.7715	-6.61644	10.7329	-8.27553	0.00359937	0.0209318	-1.65587
Pgls	Non-matrisome	Non-matrisome	11.0183	9.48175	10.7735	10.4245	5.7715	1.44287	4.32862	3.84767	-6.57684	7.13609	-5.13848	0.0036056	0.0209318	-1.26587
Cnot1	Non-matrisome	Non-matrisome	25.7094	39.9882	35.7833	33.827	5.7715	NA	1.44287	3.60719	-30.2322	21.7391	-6.10017	0.00359079	0.0209318	-1.24738
Sart1	Non-matrisome	Non-matrisome	9.96895	8.65725	9.61917	9.41512	NA	NA	1.44287	1.44287	-7.97143	7.42206	-8.25739	0.00362249	0.0209788	-1.65844
Myh9	Non-matrisome	Non-matrisome	240.304	258.068	248.559	248.977	5.7715	82.2439	135.63	74.5485	-174.429	161.763	-5.12643	0.00364242	0.0210431	-1.27499
Ppia	Non-matrisome	Non-matrisome	116.479	112.956	90.0354	106.49	5.7715	12.9859	56.2721	25.0098	-81.4806	65.7501	-5.12087	0.00365957	0.0210436	-1.27921
Phb1	Non-matrisome	Non-matrisome	34.629	32.1555	20.7774	29.1873	5.7715	5.7715	11.543	7.69533	-21.492	18.4413	-5.12069	0.00366014	0.0210436	-1.27934
Hk1	Non-matrisome	Non-matrisome	6.82086	9.48175	10.0039	8.76885	NA	1.44287	1.44287	1.44287	-7.32205	5.83846	-6.06309	0.00367252	0.021064	-1.26446
Ints3	Non-matrisome	Non-matrisome	11.0183	11.543	9.2344	10.5986	5.7715	2.88575	5.7715	4.80958	-5.78899	7.70408	-5.10659	0.00370401	0.0210876	-1.29005
Psmc1	Non-matrisome	Non-matrisome	22.0366	33.3922	31.5509	28.9932	5.7715	NA	1.44287	3.60719	-25.3949	18.8388	-6.05059	0.00370058	0.0210876	-1.27025
Hadh	Non-matrisome	Non-matrisome	9.96895	10.3062	13.0821	11.1191	5.7715	1.44287	1.44287	2.88575	-8.23334	7.00242	-5.11064	0.00369134	0.0210876	-1.28697
Prrc2a	Non-matrisome	Non-matrisome	12.0677	11.543	13.8516	12.4874	NA	1.44287	NA	1.44287	-11.0484	9.72629	-8.18861	0.00371199	0.0210876	-1.66831
Ybx3	Non-matrisome	Non-matrisome	29.3822	45.3475	46.5568	40.4288	5.7715	8.65725	17.3145	10.5811	-29.8477	25.5049	-5.09142	0.00375195	0.021264	-1.30161
Rpl26	Non-matrisome	Non-matrisome	13.117	11.9552	15.3907	13.4877	5.7715	8.65725	7.21437	7.21437	-6.27328	10.351	-5.08018	0.00378792	0.0214136	-1.3102
Psmd11	Non-matrisome	Non-matrisome	27.8081	42.0495	40.0157	36.6245	5.7715	NA	7.21437	6.49294	-30.1425	24.5718	-6.00882	0.00379629	0.0214136	-1.28974
Ktn1	Non-matrisome	Non-matrisome	NA	42.0495	45.4025	43.726	NA	NA	8.65725	8.65725	-35.062	32.0364	-15.5755	0.00391751	0.0218637	-2.36
Top2b	Non-matrisome	Non-matrisome	30.9562	46.172	45.7872	40.9718	NA	8.65725	4.32862	6.49294	-34.4587	27.1803	-5.95214	0.00393106	0.0218637	-1.3165
Utp20	Non-matrisome	Non-matrisome	19.4132	17.3145	20.3926	19.0401	5.7715	NA	NA	5.7715	-13.2671	15.723	-8.05367	0.00389621	0.0218637	-1.68822
Ubqln4	Non-matrisome	Non-matrisome	14.6911	13.192	13.8516	13.9116	5.7715	NA	NA	5.7715	-8.13692	11.8765	-8.04378	0.00391019	0.0218637	-1.68971
Pecr	Non-matrisome	Non-matrisome	3.14809	3.71025	2.3086	3.05565	5.7715	5.7715	5.7715	5.7715	2.71585	4.41357	5.04166	0.00391429	0.0218637	-1.33978
Mia2	Non-matrisome	Non-matrisome	NA	13.6042	14.6211	14.1127	NA	1.44287	4.32862	2.88575	-11.2269	8.49922	-8.03537	0.00392212	0.0218637	-1.4918
Actr3	Non-matrisome	Non-matrisome	13.117	16.9022	15.0059	15.0084	5.7715	NA	1.44287	3.60719	-11.405	10.4479	-5.94648	0.00394484	0.0218893	-1.31919
Gapdh	Non-matrisome	Non-matrisome	138.516	168.61	119.662	142.263	5.7715	38.9576	69.258	37.9957	-104.267	90.1293	-5.02307	0.00397702	0.0219814	-1.35414
Oat	Non-matrisome	Non-matrisome	15.2158	28.4452	23.4708	22.3773	5.7715	4.32862	4.32862	4.80958	-17.5677	13.5934	-5.02223	0.00397987	0.0219814	-1.35479
Epb41l2	Non-matrisome	Non-matrisome	NA	19.788	18.4688	19.1284	NA	1.44287	5.7715	3.60719	-15.5212	11.3678	-7.97531	0.00400875	0.0220898	-1.50283
Ppp4r3a	Non-matrisome	Non-matrisome	11.0183	8.245	8.46487	9.24273	NA	1.44287	2.88575	2.16431	-7.08199	6.41136	-5.87809	0.00411611	0.0226291	-1.35203
Nxf1	Non-matrisome	Non-matrisome	13.117	12.7797	11.9278	12.6082	5.7715	NA	1.44287	3.60719	-9.00134	9.00779	-5.86487	0.00415026	0.0227264	-1.35844
Fam98a	Non-matrisome	Non-matrisome	4.72214	4.53475	4.23243	4.49644	NA	1.44287	1.44287	1.44287	-3.05402	3.27501	-5.86387	0.00415286	0.0227264	-1.35893
Usp10	Non-matrisome	Non-matrisome	8.39491	8.245	6.54103	7.72698	NA	1.44287	2.88575	2.16431	-5.56401	5.50191	-5.85974	0.00416359	0.022733	-1.36093
Cbx3	Non-matrisome	Non-matrisome	35.6784	30.9187	27.3184	31.3052	5.7715	14.4287	17.3145	12.5049	-18.8003	21.905	-4.95201	0.00422791	0.0230315	-1.40955
Caprin1	Non-matrisome	Non-matrisome	22.0366	36.6902	40.7853	33.1707	5.7715	2.88575	10.1001	6.25246	-26.9183	19.7116	-4.94742	0.00424475	0.0230706	-1.41316
Khdrbs1	Non-matrisome	Non-matrisome	13.117	14.0165	15.7754	14.303	NA	2.88575	NA	2.88575	-11.4184	11.4487	-7.80069	0.00427542	0.0231844	-1.72762
FAM120A	Non-matrisome	Non-matrisome	16.7898	23.4982	18.084	19.4574	5.7715	NA	1.44287	3.60719	-15.8583	13.1173	-5.80608	0.00430637	0.0232993	-1.38721
Krt7	Non-matrisome	Non-matrisome	17.3145	30.0942	23.4708	23.6265	5.7715	5.7715	8.65725	6.73342	-16.8931	15.18	-4.92034	0.00434565	0.0234587	-1.43451
Fbl	Non-matrisome	Non-matrisome	15.2158	19.788	21.9317	18.9785	5.7715	NA	1.44287	3.60719	-15.3729	12.83	-5.78284	0.00437009	0.0234843	-1.3987
Pmpca	Non-matrisome	Non-matrisome	8.39491	8.65725	8.46487	8.50567	5.7715	2.88575	2.88575	3.84767	-4.65801	6.17667	-4.90408	0.00440758	0.0236326	-1.44739
Atp6v1a	Non-matrisome	Non-matrisome	15.7405	22.6737	21.9317	20.1153	5.7715	NA	1.44287	3.60719	-16.5133	13.5121	-5.76578	0.00441757	0.023633	-1.40717
Pex14	Non-matrisome	Non-matrisome	11.0183	10.7185	9.2344	10.3237	NA	NA	1.44287	1.44287	-8.88525	8.10352	-7.70025	0.00443945	0.0236969	-1.74404
Rab5a	Non-matrisome	Non-matrisome	9.96895	14.0165	11.1582	11.7146	5.7715	1.44287	4.32862	3.84767	-7.8669	7.78111	-4.88203	0.00449323	0.0239305	-1.46493
Hnrnpc	Non-matrisome	Non-matrisome	68.7333	52.768	57.3302	59.6105	5.7715	25.9717	30.3004	20.6812	-38.9293	40.1459	-4.87851	0.00450707	0.0239507	-1.46773
Srrt	Non-matrisome	Non-matrisome	12.0677	12.7797	11.9278	12.2584	5.7715	NA	1.44287	3.60719	-8.65226	8.79791	-5.72719	0.00452736	0.024005	-1.42647
Aifm1	Non-matrisome	Non-matrisome	13.6417	23.4982	21.9317	19.6906	5.7715	7.21437	4.32862	5.7715	-13.9191	12.731	-4.86234	0.00457133	0.024171	-1.48065
Atp13a1	Non-matrisome	Non-matrisome	13.117	9.48175	10.3887	10.9958	5.7715	1.44287	1.44287	2.88575	-8.11008	6.94079	-4.85793	0.00458904	0.024171	-1.48418
Eea1	Non-matrisome	Non-matrisome	11.0183	17.7267	12.6973	13.8141	5.7715	1.44287	1.44287	2.88575	-10.9284	8.34994	-4.85893	0.00458504	0.024171	-1.48339
Kp02	Non-matrisome	Non-matrisome	12.0677	14.841	12.6973	13.202	NA	1.44287	NA	1.44287	-11.7525	10.2622	-7.59331	0.00462334	0.024298	-1.76205
Krt19	Non-matrisome	Non-matrisome	24.1354	28.033	28.088	26.7521	5.7715	8.65725	17.3145	10.5811	-16.171	18.6666	-4.83888	0.00466648	0.0244171	-1.49947
Api5	Non-matrisome	Non-matrisome	13.6417	16.9022	18.084	16.2093	5.7715	1.44287	8.65725	5.29054	-10.9188	10.7499	-4.84123	0.00465687	0.0244171	-1.49759
Elp3	Non-matrisome	Non-matrisome	12.0677	12.3675	11.543	11.9927	5.7715	NA	NA	5.7715	-6.22092	10.4374	-7.55752	0.00468711	0.0244484	-1.7682
Xpo5	Non-matrisome	Non-matrisome	19.4132	14.0165	11.543	14.9909	5.7715	1.44287	2.88575	3.36671	-11.6242	9.17881	-4.83246	0.00469294	0.0244484	-1.50464
Iqgap2	Non-matrisome	Non-matrisome	14.6911	18.5512	21.1622	18.1348	5.7715	NA	1.44287	3.60719	-14.5285	12.3238	-5.66312	0.00471712	0.0245208	-1.45893
Tpp2	Non-matrisome	Non-matrisome	13.117	22.6737	17.6993	17.83	5.7715	5.7715	5.7715	5.7715	-12.0585	11.8008	-4.82406	0.00472776	0.0245227	-1.51141
Ak2	Non-matrisome	Non-matrisome	24.66	38.7515	31.9356	31.7824	5.7715	7.21437	15.8716	9.61917	-22.1632	20.7008	-4.79488	0.00485122	0.0251085	-1.53502
Cat	Non-matrisome	Non-matrisome	38.8265	62.2497	55.4064	52.1609	5.7715	NA	10.1001	7.93581	-44.2454	34.4708	-5.59152	0.00494084	0.025517	-1.49582
Glg1	Non-matrisome	Non-matrisome	9.44427	12.3675	15.0059	12.2726	5.7715	1.44287	1.44287	2.88575	-9.38681	7.57915	-4.76975	0.00496053	0.0255634	-1.55546
Ecpas	Non-matrisome	Non-matrisome	19.4132	26.7962	26.5489	24.2528	NA	8.65725	2.88575	5.7715	-18.4715	16.8603	-5.56242	0.00503544	0.025828	-1.511
Maoa	Non-matrisome	Non-matrisome	9.44427	10.7185	9.2344	9.79906	5.7715	4.32862	NA	5.05006	-4.74786	7.89946	-5.55971	0.00504435	0.025828	-1.51241
Tmem43	Non-matrisome	Non-matrisome	11.0183	9.0695	10.3887	10.1588	NA	1.44287	NA	1.44287	-8.72035	7.97985	-7.37179	0.00503741	0.025828	-1.80115
Atp5f1a	Non-matrisome	Non-matrisome	226.663	288.163	257.794	257.54	5.7715	50.5006	145.73	67.3342	-190.205	162.437	-4.73147	0.00513266	0.026112	-1.58682
Cs	Non-matrisome	Non-matrisome	20.4626	26.384	30.0118	25.6195	5.7715	7.21437	14.4287	9.13821	-16.4813	17.3788	-4.73221	0.00512924	0.026112	-1.58621
Prep	Non-matrisome	Non-matrisome	20.4626	18.9635	11.1582	16.8614	5.7715	2.88575	1.44287	3.36671	-13.4947	10.1141	-4.73389	0.00512159	0.026112	-1.58483
Raly	Non-matrisome	Non-matrisome	15.2158	17.7267	15.7754	16.2393	5.7715	NA	NA	5.7715	-10.4719	13.6224	-7.29206	0.00519834	0.0263899	-1.81584
Fh	Non-matrisome	Non-matrisome	22.0366	35.8657	32.3204	30.0743	5.7715	4.32862	14.4287	8.17629	-21.898	19.1253	-4.68137	0.00536849	0.0270808	-1.62822
Arhgap1	Non-matrisome	Non-matrisome	10.4936	8.65725	9.2344	9.46176	5.7715	1.44287	2.88575	3.36671	-6.09505	6.41423	-4.68547	0.00534874	0.0270808	-1.62482
Dbn1	Non-matrisome	Non-matrisome	25.1847	22.6737	19.6231	22.4939	NA	NA	2.88575	2.88575	-19.6197	17.5918	-7.2154	0.00535954	0.0270808	-1.83029
Peg3	Non-matrisome	Non-matrisome	11.0183	7.83275	11.543	10.1314	NA	2.88575	1.44287	2.16431	-7.96883	6.94454	-5.45321	0.00541088	0.0272371	-1.56895
Nsun2	Non-matrisome	Non-matrisome	13.6417	21.8492	21.1622	18.8844	5.7715	8.65725	7.21437	7.21437	-11.67	13.0494	-4.66702	0.00543835	0.0272603	-1.64016
Eml4	Non-matrisome	Non-matrisome	9.96895	11.1307	8.46487	9.85486	5.7715	2.88575	1.44287	3.36671	-6.48815	6.61078	-4.66853	0.00543094	0.0272603	-1.6389
Prpf19	Non-matrisome	Non-matrisome	15.2158	21.8492	20.0079	19.0243	5.7715	NA	7.21437	6.49294	-12.5371	14.0118	-5.42153	0.00552616	0.0276424	-1.58606
Acad9	Non-matrisome	Non-matrisome	10.4936	17.7267	15.7754	14.6653	5.7715	5.7715	4.32862	5.29054	-9.37473	9.97791	-4.6444	0.00555061	0.0277066	-1.65905
Tubb4a	Non-matrisome	Non-matrisome	90.2453	83.2745	79.2619	84.2606	5.7715	23.086	51.9435	26.9337	-57.3269	55.5971	-4.63191	0.0056138	0.0279635	-1.66953
Mov10	Non-matrisome	Non-matrisome	14.6911	21.8492	20.3926	18.9777	5.7715	NA	1.44287	3.60719	-15.3763	12.8295	-5.39297	0.00563265	0.027999	-1.6016
Msh6	Non-matrisome	Non-matrisome	14.1664	16.0777	16.545	15.5964	5.7715	NA	NA	5.7715	-9.83064	13.1402	-7.07638	0.00566905	0.0281213	-1.85733
Kctd12	Non-matrisome	Non-matrisome	14.1664	22.6737	20.3926	19.0776	5.7715	8.65725	8.65725	7.69533	-11.3823	13.3865	-4.61516	0.00569979	0.0282139	-1.68361
Rpl19	Non-matrisome	Non-matrisome	13.117	18.5512	19.6231	17.0971	5.7715	8.65725	8.65725	7.69533	-9.4018	12.3962	-4.61293	0.00571136	0.0282139	-1.68549
Usp5	Non-matrisome	Non-matrisome	19.4132	23.086	22.7012	21.7335	5.7715	12.9859	12.9859	10.5811	-11.1524	16.1573	-4.59634	0.00579825	0.0285694	-1.69949
Fxr2	Non-matrisome	Non-matrisome	11.0183	8.245	11.1582	10.1405	5.7715	2.88575	1.44287	3.36671	-6.77381	6.75361	-4.59464	0.00580727	0.0285694	-1.70093
Tpm1	Non-matrisome	Non-matrisome	27.2835	21.0247	NA	24.1541	5.7715	5.7715	NA	5.7715	-18.3826	14.9628	-6.99745	0.00585529	0.0286285	-1.70954
Golim4	Non-matrisome	Non-matrisome	13.117	14.841	15.0059	14.3213	5.7715	NA	NA	5.7715	-8.55467	12.1839	-7.00195	0.00584446	0.0286285	-1.87227
Mapk3	Non-matrisome	Non-matrisome	11.543	14.841	13.8516	13.4119	5.7715	1.44287	NA	3.60719	-9.80556	9.48999	-5.33765	0.00584613	0.0286285	-1.63202
St13	Non-matrisome	Non-matrisome	8.39491	12.3675	10.0039	10.2554	5.7715	2.88575	2.88575	3.84767	-6.40778	7.05156	-4.58128	0.00587849	0.0286832	-1.71224
Ctps1	Non-matrisome	Non-matrisome	9.44427	9.48175	11.9278	10.2846	5.7715	1.44287	4.32862	3.84767	-6.43693	7.06613	-4.55867	0.00600132	0.0291632	-1.73145
Ddx17	Non-matrisome	Non-matrisome	46.6967	50.2945	54.2521	50.4144	5.7715	7.21437	31.7432	14.9097	-35.5047	32.6621	-4.55069	0.00604538	0.0292688	-1.73825
Bzw1	Non-matrisome	Non-matrisome	11.0183	10.7185	9.61917	10.452	5.7715	NA	2.88575	4.32862	-6.12391	8.00265	-5.28767	0.00604758	0.0292688	-1.65986
Aars1	Non-matrisome	Non-matrisome	17.8392	21.437	18.8536	19.3766	5.7715	12.9859	10.1001	9.61917	-9.75742	14.4979	-4.54753	0.00606296	0.0292838	-1.74096
Snrpg	Non-matrisome	Non-matrisome	7.87023	8.245	8.84963	8.32162	5.7715	2.88575	4.32862	4.32862	-3.99299	6.32512	-4.52961	0.00616366	0.0296787	-1.75629
Apool	Non-matrisome	Non-matrisome	11.0183	14.4287	10.7735	12.0735	5.7715	1.44287	5.7715	4.32862	-7.74489	8.20107	-4.52856	0.00616959	0.0296787	-1.75718
Ugt2b34	Non-matrisome	Non-matrisome	11.0183	10.7185	10.7735	10.8368	5.7715	NA	NA	5.7715	-5.06453	9.57045	-6.85475	0.00621291	0.029827	-1.90278
Abcf2	Non-matrisome	Non-matrisome	12.0677	14.841	16.545	14.4845	5.7715	NA	1.44287	3.60719	-10.8781	10.1336	-5.24367	0.00623198	0.0298584	-1.68466
Rangap1	Non-matrisome	Non-matrisome	16.7898	25.9717	25.7794	22.847	5.7715	NA	2.88575	4.32862	-18.5246	15.4396	-5.2304	0.00628893	0.0300709	-1.69219
Hnrnpm	Non-matrisome	Non-matrisome	151.633	116.254	111.582	126.49	5.7715	27.4146	70.7009	34.629	-91.861	80.5595	-4.49231	0.00637951	0.030443	-1.78837
Vim	Non-matrisome	Non-matrisome	221.94	213.545	191.614	209.033	5.7715	44.7291	128.416	59.6388	-149.394	134.336	-4.48322	0.00643346	0.0305782	-1.79623
Itga2	Non-matrisome	Non-matrisome	4.72214	2.4735	3.84767	3.6811	NA	14.4287	10.1001	12.2644	8.58124	7.11443	5.19875	0.00642734	0.0305782	-1.71026
Myh11	Non-matrisome	Non-matrisome	25.7094	37.927	45.7872	36.4745	5.7715	2.88575	15.8716	8.17629	-28.2983	22.3254	-4.47767	0.00646661	0.0306746	-1.80103
Septin2	Non-matrisome	Non-matrisome	11.543	16.49	19.6231	15.8854	5.7715	4.32862	7.21437	5.7715	-10.1139	10.8284	-4.46012	0.00657284	0.0311167	-1.81626
Mcm6	Non-matrisome	Non-matrisome	31.4809	39.9882	44.2482	38.5724	5.7715	8.65725	23.086	12.5049	-26.0675	25.5387	-4.43966	0.00669933	0.0316527	-1.83408
Ptpn23	Non-matrisome	Non-matrisome	9.44427	11.543	9.61917	10.2021	NA	NA	1.44287	1.44287	-8.76162	8.01233	-6.67224	0.0067134	0.0316565	-1.94253
Actl6a	Non-matrisome	Non-matrisome	23.6107	16.0777	12.3125	17.3337	5.7715	1.44287	1.44287	2.88575	-14.4479	10.1097	-4.42197	0.00681089	0.0319897	-1.84955
Rpl8	Non-matrisome	Non-matrisome	12.5924	16.49	16.1602	15.0809	5.7715	8.65725	1.44287	5.29054	-9.79031	10.1857	-4.41486	0.00685634	0.0321399	-1.85578
Macf1	Non-matrisome	Non-matrisome	46.6967	62.2497	57.715	55.5538	5.7715	NA	NA	5.7715	-49.818	43.1082	-6.58776	0.00696302	0.0323855	-1.96167
Prmt5	Non-matrisome	Non-matrisome	9.44427	11.543	9.61917	10.2021	5.7715	NA	4.32862	5.05006	-5.15479	8.14131	-5.08794	0.00694212	0.0323855	-1.77465
Igf2bp1	Non-matrisome	Non-matrisome	28.3328	37.1025	35.3985	33.6113	NA	NA	4.32862	4.32862	-29.2755	26.2906	-6.60021	0.00692548	0.0323855	-1.95882
Cpsf1	Non-matrisome	Non-matrisome	9.96895	9.894	13.8516	11.2382	5.7715	1.44287	4.32862	3.84767	-7.39052	7.54293	-4.40029	0.0069506	0.0323855	-1.86858
Sec22b	Non-matrisome	Non-matrisome	14.1664	13.192	12.3125	13.2236	5.7715	NA	NA	5.7715	-7.44835	11.3606	-6.57074	0.00701479	0.0324996	-1.96559
Ppid	Non-matrisome	Non-matrisome	11.0183	19.788	14.6211	15.1425	5.7715	1.44287	4.32862	3.84767	-11.2948	9.49507	-4.39244	0.00700199	0.0324996	-1.87549
Pdcd11	Non-matrisome	Non-matrisome	19.4132	16.0777	16.9297	17.4736	5.7715	NA	NA	5.7715	-11.6943	14.5481	-6.55455	0.00706448	0.0326563	-1.96933
Tjp2	Non-matrisome	Non-matrisome	9.96895	7.4205	10.3887	9.25938	5.7715	4.32862	4.32862	4.80958	-4.4498	7.03448	-4.38126	0.00707599	0.0326563	-1.88536
Cct4	Non-matrisome	Non-matrisome	37.2524	50.2945	48.0958	45.2142	5.7715	5.7715	27.4146	12.9859	-32.2284	29.1001	-4.35159	0.00727676	0.0333251	-1.91164
Strap	Non-matrisome	Non-matrisome	21.512	35.0412	33.0899	29.881	5.7715	11.543	14.4287	10.5811	-19.3	20.2311	-4.35289	0.00726781	0.0333251	-1.91049
Lgals3bp	Non-matrisome	Non-matrisome	1.04936	3.298	3.07813	2.47517	5.7715	5.7715	7.21437	6.25246	3.77729	4.36381	4.3524	0.00727118	0.0333251	-1.91092
Usp9x	Non-matrisome	Non-matrisome	13.6417	15.6655	16.1602	15.1558	5.7715	NA	NA	5.7715	-9.39041	12.8097	-6.47957	0.00730082	0.0333712	-1.98691
Spcs2	Non-matrisome	Non-matrisome	12.0677	11.1307	11.1582	11.4522	5.7715	NA	NA	5.7715	-5.67824	10.032	-6.44965	0.007398	0.033745	-1.99404
Cluh	Non-matrisome	Non-matrisome	13.117	8.245	11.9278	11.0966	5.7715	1.44287	2.88575	3.36671	-7.7299	7.23166	-4.33228	0.00741089	0.033745	-1.92883
Rps7	Non-matrisome	Non-matrisome	35.6784	28.8575	17.6993	27.4117	5.7715	8.65725	5.7715	6.73342	-20.6783	17.0726	-4.32442	0.00746636	0.0338074	-1.93585
Actr2	Non-matrisome	Non-matrisome	16.7898	11.543	13.4668	13.9332	5.7715	5.7715	8.65725	6.73342	-7.1998	10.3333	-4.32243	0.00748046	0.0338074	-1.93762
Dis3	Non-matrisome	Non-matrisome	12.0677	16.49	17.3145	15.2907	5.7715	NA	1.44287	3.60719	-11.686	10.6173	-4.98816	0.00744925	0.0338074	-1.83417
Anp32a	Non-matrisome	Non-matrisome	8.39491	9.0695	11.1582	9.54088	5.7715	1.44287	1.44287	2.88575	-6.65513	6.21331	-4.32232	0.00748126	0.0338074	-1.93772
Rps28	Non-matrisome	Non-matrisome	27.8081	25.9717	27.3184	27.0328	5.7715	5.7715	18.7574	10.1001	-16.9326	18.5664	-4.3164	0.00752343	0.0339337	-1.94302
Sec61a1	Non-matrisome	Non-matrisome	14.6911	10.3062	12.3125	12.4366	5.7715	2.88575	7.21437	5.29054	-7.14608	8.86358	-4.31425	0.00753882	0.0339389	-1.94494
Uba2	Non-matrisome	Non-matrisome	14.1664	14.841	14.6211	14.5428	5.7715	2.88575	10.1001	6.25246	-8.29039	10.3977	-4.30775	0.00758557	0.0340851	-1.95077
G3bp2	Non-matrisome	Non-matrisome	13.6417	11.543	11.1582	12.1143	5.7715	NA	1.44287	3.60719	-8.50598	8.71147	-4.95454	0.00763021	0.0342212	-1.85456
Gcc1	Non-matrisome	Non-matrisome	1.04936	1.23675	1.1543	1.1468	5.7715	NA	NA	5.7715	4.6243	2.30298	6.34524	0.00775078	0.0346318	-2.01943
Gigyf1	Non-matrisome	Non-matrisome	1.04936	1.23675	1.1543	1.1468	5.7715	NA	NA	5.7715	4.6243	2.30298	6.34524	0.00775078	0.0346318	-2.01943
Csrp1	Non-matrisome	Non-matrisome	1.04936	2.06125	3.07813	2.06292	5.7715	7.21437	10.1001	7.69533	5.63242	4.87912	4.28016	0.00778764	0.0347314	-1.97556
Mmut	Non-matrisome	Non-matrisome	8.39491	12.7797	10.0039	10.3929	5.7715	2.88575	4.32862	4.32862	-6.06424	7.36074	-4.2694	0.00786814	0.0350249	-1.98527
Myh14	Non-matrisome	Non-matrisome	39.8758	67.609	69.6428	59.0425	5.7715	NA	7.21437	6.49294	-52.5669	38.0227	-4.88974	0.00799434	0.0354545	-1.89435
Trip11	Non-matrisome	Non-matrisome	10.4936	16.9022	11.1582	12.8514	5.7715	2.88575	4.32862	4.32862	-8.52275	8.59	-4.25433	0.00798256	0.0354545	-1.99891
Hdac1	Non-matrisome	Non-matrisome	12.0677	17.3145	17.3145	15.5656	5.7715	NA	1.44287	3.60719	-11.9619	10.7822	-4.88581	0.00801708	0.0354893	-1.89678
Aldh7a1	Non-matrisome	Non-matrisome	9.96895	13.192	11.1582	11.4397	5.7715	NA	5.7715	5.7715	-5.67176	9.17244	-4.87936	0.00805457	0.0355893	-1.90078
Cct8	Non-matrisome	Non-matrisome	48.7954	59.7762	68.4885	59.02	5.7715	12.9859	36.0719	18.2764	-40.7436	38.6482	-4.21981	0.00825186	0.0362586	-2.03029
Idh3a	Non-matrisome	Non-matrisome	15.7405	13.192	15.0059	14.6461	5.7715	NA	NA	5.7715	-8.87021	12.4275	-6.19925	0.00828203	0.0362586	-2.05632
Ckap5	Non-matrisome	Non-matrisome	15.2158	33.3922	24.2403	24.2828	5.7715	1.44287	4.32862	3.84767	-20.4351	14.0652	-4.22161	0.00823757	0.0362586	-2.02865
Drg1	Non-matrisome	Non-matrisome	8.39491	10.7185	9.61917	9.57752	NA	NA	1.44287	1.44287	-8.13448	7.54386	-6.20261	0.00826926	0.0362586	-2.05545
Akap9	Non-matrisome	Non-matrisome	14.6911	17.7267	23.086	18.5013	5.7715	NA	2.88575	4.32862	-14.1711	12.8322	-4.82948	0.00835205	0.0364113	-1.93193
Sin3a	Non-matrisome	Non-matrisome	20.4626	13.192	17.6993	17.118	5.7715	NA	1.44287	3.60719	-13.5029	11.7136	-4.83194	0.00833708	0.0364113	-1.93038
Maged1	Non-matrisome	Non-matrisome	3.67277	4.1225	4.23243	4.00923	NA	1.44287	1.44287	1.44287	-2.56568	2.98269	-4.82773	0.00836269	0.0364113	-1.93302
Ehd2	Non-matrisome	Non-matrisome	8.39491	10.3062	9.2344	9.31185	5.7715	1.44287	4.32862	3.84767	-5.46419	6.57976	-4.19972	0.00841343	0.0365655	-2.04866
Prdx5	Non-matrisome	Non-matrisome	7.34554	8.65725	8.84963	8.28414	5.7715	2.88575	4.32862	4.32862	-3.95552	6.30638	-4.19482	0.00845331	0.036672	-2.05314
Parva	Non-matrisome	Non-matrisome	9.44427	7.83275	9.2344	8.83714	5.7715	1.44287	1.44287	2.88575	-5.95139	5.86144	-4.17691	0.00860125	0.0372461	-2.06959
Pak2	Non-matrisome	Non-matrisome	9.44427	7.83275	10.7735	9.35016	5.7715	1.44287	1.44287	2.88575	-6.46441	6.11796	-4.17166	0.0086452	0.0373686	-2.07443
Cad	Non-matrisome	Non-matrisome	39.8758	46.5842	45.4025	43.9542	5.7715	28.8575	18.7574	17.7955	-26.1587	30.8748	-4.16902	0.00866739	0.0373967	-2.07686
Tuba4a	Non-matrisome	Non-matrisome	149.01	93.993	92.7288	111.91	5.7715	21.6431	51.9435	26.4527	-85.4578	69.1816	-4.16529	0.00869885	0.0374647	-2.0803
Gsn	Non-matrisome	Non-matrisome	16.7898	28.033	26.9337	23.9188	5.7715	NA	1.44287	3.60719	-20.3199	15.7942	-4.77039	0.00872188	0.0374962	-1.96933
Shmt2	Non-matrisome	Non-matrisome	25.1847	37.927	28.4727	30.5282	5.7715	14.4287	15.8716	12.024	-18.5042	21.2761	-4.15573	0.00878005	0.0376784	-2.08912
Gm21992	Non-matrisome	Non-matrisome	6.82086	7.00825	8.0801	7.30307	NA	NA	1.44287	1.44287	-5.85706	5.83802	-6.06648	0.00880733	0.0377276	-2.09134
Atp5pd	Non-matrisome	Non-matrisome	22.5613	34.2167	30.3966	29.0582	5.7715	4.32862	17.3145	9.13821	-19.92	19.0982	-4.14595	0.00886407	0.0379026	-2.09817
Dock1	Non-matrisome	Non-matrisome	15.7405	13.192	15.3907	14.7744	5.7715	NA	NA	5.7715	-8.99898	12.5237	-6.04838	0.00888233	0.0379128	-2.09623
Akr1a1	Non-matrisome	Non-matrisome	14.6911	11.9552	8.46487	11.7037	5.7715	1.44287	2.88575	3.36671	-8.33703	7.53522	-4.13863	0.00892757	0.0380378	-2.10495
Rps5	Non-matrisome	Non-matrisome	16.2651	31.7432	22.7012	23.5699	5.7715	4.32862	8.65725	6.25246	-17.3174	14.9112	-4.13304	0.00897641	0.0381777	-2.11014
Elavl1	Non-matrisome	Non-matrisome	18.8885	21.437	24.2403	21.5219	5.7715	NA	NA	5.7715	-15.7611	17.5843	-6.01328	0.00903009	0.0382018	-2.10578
Dlat	Non-matrisome	Non-matrisome	11.543	14.841	13.8516	13.4119	NA	2.88575	NA	2.88575	-10.5204	10.7803	-6.01399	0.00902708	0.0382018	-2.10559
Ash2l	Non-matrisome	Non-matrisome	7.87023	5.7715	6.54103	6.72759	NA	1.44287	2.88575	2.16431	-4.56558	4.90228	-4.7282	0.00899813	0.0382018	-1.99637
Nup210	Non-matrisome	Non-matrisome	22.0366	29.2697	27.3184	26.2083	5.7715	15.8716	14.4287	12.024	-14.1843	19.1161	-4.11351	0.00914947	0.0382779	-2.1283
Uso1	Non-matrisome	Non-matrisome	16.7898	24.3227	27.3184	22.8103	5.7715	5.7715	12.9859	8.17629	-14.634	15.4933	-4.11229	0.00916039	0.0382779	-2.12944
Cyb5r3	Non-matrisome	Non-matrisome	20.9873	29.682	28.8575	26.5089	5.7715	1.44287	15.8716	7.69533	-18.8136	17.1021	-4.1127	0.00915673	0.0382779	-2.12906
Nrdc	Non-matrisome	Non-matrisome	8.39491	8.65725	8.0801	8.37742	5.7715	NA	4.32862	5.05006	-3.32792	7.04648	-4.718	0.00906657	0.0382779	-2.00296
Ak3	Non-matrisome	Non-matrisome	10.4936	16.9022	14.2364	13.8774	NA	4.32862	1.44287	2.88575	-10.9848	9.48075	-4.7136	0.00909621	0.0382779	-2.0058
Ppp1r9b	Non-matrisome	Non-matrisome	11.543	8.65725	8.46487	9.55504	5.7715	1.44287	1.44287	2.88575	-6.66929	6.22039	-4.11669	0.00912104	0.0382779	-2.12534
Dap3	Non-matrisome	Non-matrisome	5.7715	5.7715	5.7715	5.7715	NA	NA	1.44287	1.44287	-4.32862	4.68934	-5.9837	0.00915713	0.0382779	-2.11392
Rpl36	Non-matrisome	Non-matrisome	9.44427	10.7185	12.6973	10.9534	5.7715	NA	4.32862	5.05006	-5.90282	8.59204	-4.70125	0.00918022	0.0382937	-2.0138
Tuba1a	Non-matrisome	Non-matrisome	248.699	220.966	167.758	212.474	5.7715	85.1296	111.101	67.3342	-145.14	139.904	-4.1057	0.00921969	0.0383243	-2.13558
Ncbp1	Non-matrisome	Non-matrisome	9.44427	11.9552	12.3125	11.2374	NA	NA	1.44287	1.44287	-9.79014	8.78873	-5.97219	0.00920718	0.0383243	-2.1171
Calu	Non-matrisome	Non-matrisome	42.4992	22.6737	23.4708	29.5479	5.7715	2.88575	7.21437	5.29054	-24.2574	17.4192	-4.09751	0.00929408	0.0385664	-2.14323
Pdha1	Non-matrisome	Non-matrisome	12.0677	16.0777	15.7754	14.6403	NA	NA	1.44287	1.44287	-13.1928	11.3409	-5.93584	0.00936767	0.0388043	-2.12724
Rps10	Non-matrisome	Non-matrisome	NA	31.331	28.4727	29.9019	NA	NA	10.1001	10.1001	-19.8075	23.3013	-10.0004	0.00950818	0.0390053	-2.50203
Rpl13	Non-matrisome	Non-matrisome	20.9873	17.7267	20.3926	19.7022	5.7715	8.65725	14.4287	9.61917	-10.0831	14.6607	-4.06848	0.00956333	0.0390053	-2.17045
Luc7l3	Non-matrisome	Non-matrisome	7.87023	9.0695	10.7735	9.23773	5.7715	5.7715	5.7715	5.7715	-3.46623	7.50461	-4.07094	0.00954012	0.0390053	-2.16813
Dhrs7	Non-matrisome	Non-matrisome	1.57405	1.23675	1.1543	1.3217	5.7715	NA	NA	5.7715	4.45082	2.43415	5.91022	0.00948298	0.0390053	-2.13445
Fkbp5	Non-matrisome	Non-matrisome	1.04936	1.23675	1.53907	1.27506	5.7715	NA	NA	5.7715	4.49553	2.39917	5.91627	0.00945559	0.0390053	-2.13274
Srrm1	Non-matrisome	Non-matrisome	2.09873	1.23675	1.53907	1.62485	5.7715	NA	4.32862	5.05006	3.426	2.99493	4.65066	0.00953413	0.0390053	-2.04682
Efhd2	Non-matrisome	Non-matrisome	15.2158	9.48175	10.0039	11.5672	5.7715	2.88575	2.88575	3.84767	-7.71948	7.70741	-4.07477	0.00950419	0.0390053	-2.16453
Sae1	Non-matrisome	Non-matrisome	17.3145	30.5065	16.545	21.4553	5.7715	4.32862	4.32862	4.80958	-16.6457	13.1325	-4.06639	0.00958305	0.0390191	-2.17241
Dync1li1	Non-matrisome	Non-matrisome	12.0677	16.9022	15.7754	14.9151	5.7715	7.21437	10.1001	7.69533	-7.21979	11.3052	-4.05787	0.00966388	0.0392143	-2.18042
Umps	Non-matrisome	Non-matrisome	13.117	14.0165	10.3887	12.5074	5.7715	NA	1.44287	3.60719	-8.90327	8.94732	-4.63493	0.00964756	0.0392143	-2.05718
Mrpl39	Non-matrisome	Non-matrisome	3.67277	4.1225	4.6172	4.13749	NA	1.44287	1.44287	1.44287	-2.69368	3.05964	-4.62846	0.00969469	0.0392726	-2.06145
Tpm4	Non-matrisome	Non-matrisome	25.1847	19.3757	15.0059	19.8555	5.7715	1.44287	10.1001	5.7715	-14.084	12.8135	-4.05148	0.00972514	0.0392871	-2.18645
Tpd52	Non-matrisome	Non-matrisome	9.44427	7.4205	8.46487	8.44321	NA	1.44287	NA	1.44287	-7.00446	6.69313	-5.85643	0.00973121	0.0392871	-2.14979
Tubb5	Non-matrisome	Non-matrisome	166.324	188.81	159.293	171.476	5.7715	54.8292	111.101	57.234	-114.242	114.355	-4.02978	0.00993622	0.040047	-2.20696
Nup160	Non-matrisome	Non-matrisome	15.7405	14.0165	17.3145	15.6905	5.7715	NA	NA	5.7715	-9.91878	13.2107	-5.79134	0.0100431	0.0404095	-2.16869
Pgam1	Non-matrisome	Non-matrisome	17.8392	32.1555	21.5469	23.8472	5.7715	7.21437	10.1001	7.69533	-16.1519	15.7713	-4.01624	0.0100707	0.0404523	-2.2198
Cct2	Non-matrisome	Non-matrisome	84.4738	129.446	99.2698	104.397	5.7715	18.7574	60.6007	28.3765	-76.0201	66.3866	-4.0114	0.0101192	0.0405108	-2.2244
Nol6	Non-matrisome	Non-matrisome	10.4936	10.7185	11.543	10.9184	5.7715	NA	NA	5.7715	-5.14859	9.63166	-5.77921	0.0101027	0.0405108	-2.17226
Fkbp15	Non-matrisome	Non-matrisome	5.7715	6.596	6.15627	6.17459	NA	1.44287	NA	1.44287	-4.73001	4.99166	-5.76122	0.0101918	0.0407332	-2.17757
Hkdc1	Non-matrisome	Non-matrisome	6.82086	11.543	11.9278	10.0972	NA	1.44287	1.44287	1.44287	-8.64773	6.63548	-4.55073	0.0102832	0.0410297	-2.11329
Cnn3	Non-matrisome	Non-matrisome	10.4936	9.894	10.3887	10.2588	5.7715	NA	NA	5.7715	-4.48633	9.13696	-5.72477	0.0103757	0.0411921	-2.18843
Sirt2	Non-matrisome	Non-matrisome	1.04936	1.649	1.1543	1.28422	5.7715	NA	NA	5.7715	4.48633	2.40604	5.72477	0.0103757	0.0411921	-2.18843
Sun2	Non-matrisome	Non-matrisome	12.5924	12.3675	10.0039	11.6546	NA	NA	2.88575	2.88575	-8.7755	9.46239	-5.73132	0.0103424	0.0411921	-2.18647
Mccc2	Non-matrisome	Non-matrisome	15.7405	11.1307	8.84963	11.9069	5.7715	1.44287	1.44287	2.88575	-9.0212	7.39635	-3.98458	0.0103933	0.0411934	-2.24997
Tufm	Non-matrisome	Non-matrisome	27.2835	57.715	48.8654	44.6213	5.7715	5.7715	17.3145	9.61917	-35.0021	27.1202	-3.97911	0.0104502	0.0413501	-2.25519
Slk	Non-matrisome	Non-matrisome	7.87023	8.245	8.46487	8.19336	5.7715	1.44287	2.88575	3.36671	-4.82666	5.78004	-3.97333	0.0105108	0.041521	-2.26073
Eif3e	Non-matrisome	Non-matrisome	25.1847	30.0942	33.8595	29.7128	5.7715	7.21437	20.2002	11.062	-18.6508	20.3874	-3.96703	0.0105772	0.0416899	-2.26676
Polr2b	Non-matrisome	Non-matrisome	13.6417	16.49	14.2364	14.7894	5.7715	NA	NA	5.7715	-9.02249	12.5349	-5.68053	0.0106048	0.0416899	-2.20178
Sarnp	Non-matrisome	Non-matrisome	13.6417	18.9635	16.1602	16.2551	NA	NA	1.44287	1.44287	-14.8126	12.5521	-5.68031	0.0106059	0.0416899	-2.20185
Ldhb	Non-matrisome	Non-matrisome	8.91959	17.7267	14.2364	13.6276	5.7715	2.88575	2.88575	3.84767	-9.7799	8.73762	-3.95103	0.0107482	0.0421795	-2.28213
Kif3b	Non-matrisome	Non-matrisome	1.57405	1.649	1.1543	1.45912	5.7715	NA	NA	5.7715	4.31285	2.53721	5.63267	0.0108601	0.0424226	-2.21644
Rnf214	Non-matrisome	Non-matrisome	1.57405	1.649	1.1543	1.45912	5.7715	NA	NA	5.7715	4.31285	2.53721	5.63267	0.0108601	0.0424226	-2.21644
Grpel1	Non-matrisome	Non-matrisome	9.96895	19.3757	14.2364	14.527	5.7715	1.44287	4.32862	3.84767	-10.6794	9.18734	-3.9404	0.0108635	0.0424226	-2.29236
Nme1	Non-matrisome	Non-matrisome	23.086	29.682	NA	26.384	5.7715	10.1001	NA	7.93581	-18.4482	17.1599	-5.62054	0.010926	0.0425972	-2.11458
Faf2	Non-matrisome	Non-matrisome	10.4936	9.894	11.543	10.6435	5.7715	1.44287	NA	3.60719	-7.03817	7.829	-4.46295	0.0110008	0.0428186	-2.17306
Srp72	Non-matrisome	Non-matrisome	8.39491	15.2532	13.4668	12.3717	5.7715	4.32862	4.32862	4.80958	-7.56208	8.59062	-3.92535	0.0110292	0.0428364	-2.30688
Nefl	Non-matrisome	Non-matrisome	8.91959	10.3062	11.543	10.2563	5.7715	1.44287	5.7715	4.32862	-5.92765	7.29245	-3.92427	0.0110412	0.0428364	-2.30793
Gm45713	Non-matrisome	Non-matrisome	NA	NA	0.384767	0.384767	NA	20.2002	17.3145	18.7574	18.3784	12.6332	9.21016	0.0111994	0.0431391	-2.54215
Igf2r	Non-matrisome	Non-matrisome	32.0056	42.874	40.4005	38.4267	5.7715	20.2002	23.086	16.3526	-22.0741	27.3896	-3.91092	0.0111908	0.0431391	-2.32085
Farsb	Non-matrisome	Non-matrisome	14.6911	18.5512	17.3145	16.8523	5.7715	NA	NA	5.7715	-11.0895	14.0821	-5.56946	0.0112097	0.0431391	-2.23614
Cert1	Non-matrisome	Non-matrisome	2.09873	2.06125	1.53907	1.89968	NA	4.32862	5.7715	5.05006	3.14998	3.15983	4.44359	0.0111671	0.0431391	-2.18641
Srpk1	Non-matrisome	Non-matrisome	6.82086	5.7715	6.54103	6.3778	NA	NA	1.44287	1.44287	-4.93427	5.14407	-5.56973	0.0112081	0.0431391	-2.23605
Cbx1	Non-matrisome	Non-matrisome	23.086	31.7432	26.9337	27.2543	5.7715	15.8716	15.8716	12.5049	-14.7494	19.8796	-3.90248	0.0112866	0.0432045	-2.32904
Atad3	Non-matrisome	Non-matrisome	13.6417	14.841	19.6231	16.0353	5.7715	NA	7.21437	6.49294	-9.53993	12.2183	-4.43052	0.0112811	0.0432045	-2.19547
Spag9	Non-matrisome	Non-matrisome	8.39491	7.83275	8.0801	8.10259	5.7715	2.88575	1.44287	3.36671	-4.73588	5.73465	-3.8998	0.0113172	0.0432045	-2.33164
Crk	Non-matrisome	Non-matrisome	6.82086	6.596	5.7715	6.39612	NA	NA	1.44287	1.44287	-4.95576	5.15781	-5.56276	0.0112476	0.0432045	-2.23825
Akap13	Non-matrisome	Non-matrisome	4.19745	5.7715	6.54103	5.50333	NA	1.44287	1.44287	1.44287	-4.05782	3.87915	-4.42844	0.0112993	0.0432045	-2.19691
Eif3f	Non-matrisome	Non-matrisome	23.086	13.6042	20.0079	18.8994	5.7715	NA	2.88575	4.32862	-14.5601	13.0711	-4.41924	0.0113806	0.043377	-2.2033
Slc4a1ap	Non-matrisome	Non-matrisome	1.57405	0.41225	1.92383	1.30338	5.7715	4.32862	NA	5.05006	3.74544	2.80205	4.40071	0.0115464	0.0438688	-2.21622
Qars1	Non-matrisome	Non-matrisome	22.0366	28.8575	23.4708	24.7883	5.7715	NA	NA	5.7715	-19.0279	20.0341	-5.49797	0.011623	0.0439502	-2.2589
Adpgk	Non-matrisome	Non-matrisome	11.0183	10.7185	10.0039	10.5802	5.7715	NA	NA	5.7715	-4.80698	9.37806	-5.5001	0.0116104	0.0439502	-2.25822
Nup54	Non-matrisome	Non-matrisome	11.0183	10.7185	10.0039	10.5802	5.7715	NA	NA	5.7715	-4.80698	9.37806	-5.5001	0.0116104	0.0439502	-2.25822
Eif2s2	Non-matrisome	Non-matrisome	17.3145	12.3675	18.084	15.922	5.7715	10.1001	8.65725	8.17629	-7.74572	12.0492	-3.86869	0.0116797	0.0440944	-2.36195
Psip1	Non-matrisome	Non-matrisome	8.39491	16.49	16.545	13.81	5.7715	1.44287	2.88575	3.36671	-10.4432	8.58833	-3.86651	0.0117056	0.0441225	-2.36408
Tpr	Non-matrisome	Non-matrisome	59.289	84.5112	69.6428	71.1477	5.7715	NA	NA	5.7715	-65.424	54.8036	-5.4732	0.0117709	0.0442985	-2.26691
Tmed10	Non-matrisome	Non-matrisome	65.0605	37.1025	30.7813	44.3148	5.7715	10.1001	7.21437	7.69533	-36.6195	26.0051	-3.85747	0.0118137	0.0443198	-2.37293
Ola1	Non-matrisome	Non-matrisome	8.91959	7.4205	8.46487	8.26832	5.7715	1.44287	2.88575	3.36671	-4.90161	5.81751	-3.85884	0.0117972	0.0443198	-2.37158
Acaa2	Non-matrisome	Non-matrisome	46.172	70.0825	67.7189	61.3245	5.7715	15.8716	37.5147	19.7193	-41.6052	40.5219	-3.84848	0.0119222	0.0443805	-2.38173
Ass1	Non-matrisome	Non-matrisome	1.57405	0.8245	0.769533	1.05603	5.7715	15.8716	12.9859	11.543	10.487	6.29951	3.8493	0.0119123	0.0443805	-2.38093
Sgf29	Non-matrisome	Non-matrisome	1.57405	1.649	1.92383	1.71563	5.7715	NA	NA	5.7715	4.0553	2.72959	5.45158	0.0119019	0.0443805	-2.27395
Prkar1a	Non-matrisome	Non-matrisome	8.91959	17.7267	15.7754	14.1406	5.7715	1.44287	4.32862	3.84767	-10.2929	8.99413	-3.85263	0.011872	0.0443805	-2.37767
Aqr	Non-matrisome	Non-matrisome	10.4936	14.0165	14.2364	12.9155	NA	NA	1.44287	1.44287	-11.4673	10.0473	-5.44816	0.0119228	0.0443805	-2.27507
Rprd1b	Non-matrisome	Non-matrisome	8.91959	11.1307	11.9278	10.6594	5.7715	NA	2.88575	4.32862	-6.33169	8.12707	-4.35324	0.0119846	0.044541	-2.24959
Echs1	Non-matrisome	Non-matrisome	22.5613	17.7267	13.4668	17.9183	5.7715	NA	1.44287	3.60719	-14.3107	12.1939	-4.34593	0.0120539	0.0447289	-2.25477
Pa2g4	Non-matrisome	Non-matrisome	48.7954	46.9965	42.7091	46.167	5.7715	10.1001	33.1861	16.3526	-29.8144	31.2598	-3.83068	0.0121407	0.0449113	-2.39923
Eif5b	Non-matrisome	Non-matrisome	10.4936	8.65725	10.7735	9.97478	5.7715	5.7715	1.44287	4.32862	-5.64616	7.1517	-3.83174	0.0121276	0.0449113	-2.39819
Acads	Non-matrisome	Non-matrisome	15.2158	23.4982	27.3184	22.0108	5.7715	NA	2.88575	4.32862	-17.6852	14.9379	-4.28801	0.0126201	0.0465403	-2.2961
Rad23b	Non-matrisome	Non-matrisome	9.96895	10.3062	8.0801	9.45177	5.7715	NA	4.32862	5.05006	-4.40343	7.69109	-4.26956	0.0128071	0.0471572	-2.30938
Slc25a51	Non-matrisome	Non-matrisome	1.57405	1.23675	1.92383	1.57821	5.7715	NA	NA	5.7715	4.19327	2.62653	5.29206	0.0129304	0.0475375	-2.32745
Dpysl3	Non-matrisome	Non-matrisome	24.1354	37.927	34.2442	32.1022	5.7715	10.1001	20.2002	12.024	-20.0782	22.0631	-3.76567	0.0129786	0.0475681	-2.46361
Son	Non-matrisome	Non-matrisome	14.1664	10.3062	13.8516	12.7748	NA	NA	1.44287	1.44287	-11.3275	9.94178	-5.28555	0.0129747	0.0475681	-2.32969
Ctps2	Non-matrisome	Non-matrisome	8.39491	7.4205	8.46487	8.09342	5.7715	1.44287	1.44287	2.88575	-5.20767	5.48959	-3.76328	0.0130106	0.0476125	-2.466
Xpo4	Non-matrisome	Non-matrisome	10.4936	9.894	9.61917	10.0023	5.7715	NA	1.44287	3.60719	-6.39486	7.44423	-4.23387	0.0131787	0.0481536	-2.33527
H3-3b	Non-matrisome	Non-matrisome	NA	1.23675	4.6172	2.92697	NA	12.9859	17.3145	15.1502	12.2232	9.03858	5.2482	0.0132333	0.0482793	-2.2549
Cggbp1	Non-matrisome	Non-matrisome	1.57405	2.06125	1.53907	1.72479	5.7715	NA	NA	5.7715	4.0461	2.73647	5.22881	0.0133701	0.0485558	-2.34944
Hdhd2	Non-matrisome	Non-matrisome	1.57405	2.06125	1.53907	1.72479	5.7715	NA	NA	5.7715	4.0461	2.73647	5.22881	0.0133701	0.0485558	-2.34944
Gfm1	Non-matrisome	Non-matrisome	6.82086	4.53475	7.69533	6.35032	NA	1.44287	1.44287	1.44287	-4.90839	4.38734	-4.21811	0.0133468	0.0485558	-2.34676
Eif3d	Non-matrisome	Non-matrisome	11.543	16.9022	16.1602	14.8685	5.7715	NA	7.21437	6.49294	-8.37964	11.5183	-4.20223	0.0135189	0.0490214	-2.3584
Polr2a	Non-matrisome	Non-matrisome	17.8392	24.3227	21.5469	21.2363	5.7715	14.4287	11.543	10.5811	-10.6552	15.9087	-3.72329	0.0135603	0.0490227	-2.50601
Ptpa	Non-matrisome	Non-matrisome	4.19745	4.53475	6.15627	4.96282	NA	1.44287	1.44287	1.44287	-3.51841	3.55484	-4.1988	0.0135563	0.0490227	-2.36091
Bag1	Non-matrisome	Non-matrisome	8.91959	11.1307	11.1582	10.4029	5.7715	2.88575	7.21437	5.29054	-5.11232	7.8467	-3.71717	0.0136468	0.0492607	-2.51216
Ctnnb1	Non-matrisome	Non-matrisome	41.9745	31.7432	31.5509	35.0896	5.7715	NA	NA	5.7715	-29.2903	27.76	-5.17626	0.0137505	0.0495598	-2.36805
Pdia4	Non-matrisome	Non-matrisome	97.0661	95.2297	82.3401	91.5453	5.7715	44.7291	59.1579	36.5528	-54.9925	64.0491	-3.7052	0.0138178	0.0497273	-2.52421
Rps2	Non-matrisome	Non-matrisome	45.6473	32.1555	29.2423	35.6817	5.7715	11.543	21.6431	12.9859	-22.6958	24.3338	-3.69851	0.0139143	0.0499241	-2.53095
Csnk2b	Non-matrisome	Non-matrisome	0.524682	1.23675	3.07813	1.61319	5.7715	5.7715	10.1001	7.21437	5.60119	4.41378	3.69944	0.0139009	0.0499241	-2.53002
Gale	Non-matrisome	Non-matrisome	2.09873	1.649	1.92383	1.89052	5.7715	NA	NA	5.7715	3.88182	2.86076	5.14687	0.0139693	0.0500463	-2.37859
Pkm	Non-matrisome	Non-matrisome	97.0661	112.544	87.7268	99.1124	5.7715	47.6149	62.0436	38.4767	-60.6357	68.7945	-3.69212	0.0140074	0.0501025	-2.53741
Ces1d	Non-matrisome	Non-matrisome	1.57405	2.88575	1.92383	2.12788	5.7715	7.21437	11.543	8.17629	6.04841	5.15208	3.69077	0.014027	0.0501025	-2.53876
Rps6ka1	Non-matrisome	Non-matrisome	14.1664	12.3675	10.0039	12.1793	NA	NA	1.44287	1.44287	-10.7452	9.49518	-5.13236	0.0140791	0.0502133	-2.38384
Rab18	Non-matrisome	Non-matrisome	8.39491	7.83275	9.2344	8.48735	5.7715	1.44287	4.32862	3.84767	-4.63969	6.16751	-3.68278	0.0141445	0.0503713	-2.54685
Ighg1	Non-matrisome	Non-matrisome	NA	0.41225	0.384767	0.398508	NA	8.65725	5.7715	7.21437	6.81587	3.80644	5.11356	0.0142229	0.0504999	-2.3096
G3bp1	Non-matrisome	Non-matrisome	28.3328	39.1637	36.5528	34.6831	NA	NA	7.21437	7.21437	-27.4612	27.8159	-5.11532	0.0142094	0.0504999	-2.39003
Rrm1	Non-matrisome	Non-matrisome	16.7898	21.437	17.3145	18.5138	5.7715	NA	NA	5.7715	-12.7492	15.3282	-5.09539	0.0143638	0.0509242	-2.39731
Hnrnpf	Non-matrisome	Non-matrisome	135.893	223.027	182.764	180.561	5.7715	93.7869	77.9152	59.1579	-121.403	119.86	-3.6637	0.0144296	0.0510817	-2.56619
Bcap31	Non-matrisome	Non-matrisome	12.5924	15.6655	16.545	14.9343	5.7715	10.1001	1.44287	5.7715	-9.16278	10.3529	-3.65138	0.0146171	0.0516687	-2.57871
Mtap	Non-matrisome	Non-matrisome	9.44427	8.245	6.9258	8.20502	5.7715	4.32862	2.88575	4.32862	-3.8764	6.26682	-3.6313	0.0149289	0.052678	-2.59919
Ncaph	Non-matrisome	Non-matrisome	11.543	8.245	7.69533	9.16111	5.7715	1.44287	1.44287	2.88575	-6.27536	6.02343	-3.63016	0.0149468	0.052678	-2.60036
D0jc9	Non-matrisome	Non-matrisome	8.91959	7.4205	7.69533	8.01181	5.7715	1.44287	1.44287	2.88575	-5.12606	5.44878	-3.62766	0.0149861	0.0527387	-2.60291
Aco1	Non-matrisome	Non-matrisome	16.2651	17.7267	11.9278	15.3065	5.7715	8.65725	10.1001	8.17629	-7.13026	11.7414	-3.62473	0.0150325	0.0527967	-2.60591
Tsn	Non-matrisome	Non-matrisome	6.82086	8.65725	8.0801	7.85274	5.7715	4.32862	2.88575	4.32862	-3.52411	6.09068	-3.62382	0.0150468	0.0527967	-2.60684
Snu13	Non-matrisome	Non-matrisome	7.34554	11.1307	10.7735	9.74992	NA	2.88575	4.32862	3.60719	-6.13789	7.29283	-4.06551	0.0151162	0.0529624	-2.46043
Hars1	Non-matrisome	Non-matrisome	7.87023	11.1307	8.46487	9.15528	5.7715	4.32862	5.7715	5.29054	-3.86474	7.22291	-3.61433	0.0151982	0.0531716	-2.61656
Trim56	Non-matrisome	Non-matrisome	2.09873	1.23675	1.53907	1.62485	5.7715	NA	NA	5.7715	4.14856	2.66151	4.98448	0.0152641	0.0533237	-2.43872
Thy1	Non-matrisome	Non-matrisome	2.09873	2.06125	NA	2.07999	5.7715	10.1001	8.65725	8.17629	6.09727	5.73777	4.04945	0.0153185	0.0534356	-2.47264
Psmd2	Non-matrisome	Non-matrisome	34.629	43.6985	47.3263	41.8846	5.7715	24.5289	24.5289	18.2764	-23.6082	30.0805	-3.60126	0.0154094	0.0534725	-2.62997
Cpt2	Non-matrisome	Non-matrisome	18.8885	24.735	19.6231	21.0822	5.7715	NA	NA	5.7715	-15.3196	17.2545	-4.96878	0.0153975	0.0534725	-2.4447
Xpo6	Non-matrisome	Non-matrisome	1.57405	2.06125	1.1543	1.59653	5.7715	NA	NA	5.7715	4.17488	2.64027	4.96946	0.0153916	0.0534725	-2.44444
Rab5b	Non-matrisome	Non-matrisome	7.87023	9.48175	8.0801	8.47736	5.7715	1.44287	4.32862	3.84767	-4.62969	6.16251	-3.60069	0.0154187	0.0534725	-2.63055
Glmn	Non-matrisome	Non-matrisome	2.09873	2.06125	1.53907	1.89968	5.7715	NA	NA	5.7715	3.87262	2.86764	4.95836	0.0154867	0.0536303	-2.44869
Cdk2	Non-matrisome	Non-matrisome	7.34554	6.596	5.7715	6.57101	NA	NA	1.44287	1.44287	-5.13136	5.28898	-4.9553	0.0155131	0.0536437	-2.44986
Actr1a	Non-matrisome	Non-matrisome	10.4936	14.841	8.84963	11.3948	5.7715	4.32862	5.7715	5.29054	-6.10421	8.34265	-3.58939	0.0156041	0.0538805	-2.64217
Papss2	Non-matrisome	Non-matrisome	2.09873	2.06125	2.3086	2.15619	5.7715	NA	NA	5.7715	3.61508	3.06002	4.92382	0.0157877	0.0544355	-2.462
RTRAF	Non-matrisome	Non-matrisome	9.44427	12.7797	9.61917	10.6144	5.7715	NA	4.32862	5.05006	-5.5687	8.38866	-4.0099	0.0158305	0.0545043	-2.50292
Rpl17	Non-matrisome	Non-matrisome	21.512	44.1107	40.4005	35.3411	5.7715	11.543	15.8716	11.062	-24.279	23.2016	-3.56927	0.0159406	0.0547863	-2.66292
Rcc2	Non-matrisome	Non-matrisome	12.5924	8.245	8.0801	9.63915	5.7715	1.44287	1.44287	2.88575	-6.7534	6.26245	-3.56823	0.0159583	0.0547863	-2.664
Mix23	Non-matrisome	Non-matrisome	6.82086	7.4205	5.7715	6.67095	NA	NA	1.44287	1.44287	-5.2317	5.36393	-4.89924	0.0160065	0.0548727	-2.47157
Sptan1	Non-matrisome	Non-matrisome	175.244	260.954	248.944	228.381	5.7715	43.2862	150.059	66.3722	-162.008	147.376	-3.55823	0.0161289	0.0549803	-2.67434
Sptan1	Non-matrisome	Non-matrisome	175.244	258.893	248.944	227.694	5.7715	43.2862	150.059	66.3722	-161.321	147.033	-3.55816	0.01613	0.0549803	-2.67441
Aldh1b1	Non-matrisome	Non-matrisome	53.5175	61.4252	60.7931	58.5786	5.7715	18.7574	43.2862	22.605	-35.9736	40.5918	-3.55846	0.0161248	0.0549803	-2.6741
Rtn4	Non-matrisome	Non-matrisome	35.1537	47.4087	50.4044	44.3223	5.7715	24.5289	25.9717	18.7574	-25.5649	31.5398	-3.55835	0.0161267	0.0549803	-2.67421
Arhgef11	Non-matrisome	Non-matrisome	1.04936	2.06125	1.53907	1.54989	5.7715	NA	NA	5.7715	4.21959	2.60529	4.87202	0.0162534	0.0553217	-2.48226
Chdh	Non-matrisome	Non-matrisome	1.04936	2.06125	1.1543	1.42164	5.7715	NA	NA	5.7715	4.34836	2.5091	4.86923	0.016279	0.0553301	-2.48336
Hsp90ab1	Non-matrisome	Non-matrisome	306.414	324.853	324.358	318.542	5.7715	124.087	223.646	117.835	-200.707	218.188	-3.54611	0.0163383	0.0553739	-2.6869
Tubb6	Non-matrisome	Non-matrisome	54.5669	85.3357	70.4123	70.105	5.7715	23.086	44.7291	24.5289	-45.5761	47.3169	-3.54652	0.0163313	0.0553739	-2.68648
Ndufa8	Non-matrisome	Non-matrisome	9.44427	13.6042	11.543	11.5305	5.7715	NA	1.44287	3.60719	-7.9275	8.36118	-3.96994	0.0163687	0.0553983	-2.5338
Gdi1	Non-matrisome	Non-matrisome	14.6911	9.894	9.61917	11.4014	5.7715	5.7715	1.44287	4.32862	-7.07279	7.86502	-3.53644	0.0165076	0.0557893	-2.69694
Sptan1	Non-matrisome	Non-matrisome	175.244	260.954	253.176	229.791	5.7715	43.2862	151.502	66.8532	-162.938	148.322	-3.52995	0.0166224	0.0560012	-2.70369
Sptan1	Non-matrisome	Non-matrisome	175.244	258.893	253.176	229.104	5.7715	43.2862	151.502	66.8532	-162.251	147.979	-3.52892	0.0166408	0.0560012	-2.70476
Rpl10	Non-matrisome	Non-matrisome	46.172	27.6207	24.6251	32.8059	5.7715	10.1001	14.4287	10.1001	-22.7058	21.453	-3.53002	0.0166212	0.0560012	-2.70361
Sh3bgrl	Non-matrisome	Non-matrisome	1.57405	4.53475	3.84767	3.31882	5.7715	8.65725	8.65725	7.69533	4.37651	5.50708	3.52306	0.0167453	0.0561511	-2.71086
Cul7	Non-matrisome	Non-matrisome	20.9873	20.2002	15.7754	18.9877	5.7715	NA	NA	5.7715	-13.2081	15.6836	-4.81825	0.0167559	0.0561511	-2.50365
Copg2	Non-matrisome	Non-matrisome	11.543	20.2002	16.545	16.0961	5.7715	NA	1.44287	3.60719	-12.4972	11.1005	-3.94485	0.0167178	0.0561511	-2.55334
Cox7a2	Non-matrisome	Non-matrisome	9.96895	8.245	8.0801	8.76468	NA	NA	2.88575	2.88575	-5.88169	7.29495	-4.81413	0.0167952	0.0562037	-2.5053
Gatm	Non-matrisome	Non-matrisome	1.04936	0.41225	NA	0.730807	5.7715	4.32862	NA	5.05006	4.31926	2.89043	4.80719	0.0168617	0.0563473	-2.44259
Hnrnph1	Non-matrisome	Non-matrisome	120.152	239.929	175.069	178.383	5.7715	54.8292	83.6867	48.0958	-130.288	113.24	-3.51328	0.0169214	0.0564679	-2.72106
Ahsa1	Non-matrisome	Non-matrisome	8.91959	9.0695	9.2344	9.0745	5.7715	1.44287	5.7715	4.32862	-4.74587	6.70156	-3.50892	0.0170007	0.0566532	-2.72561
Hnrnpa2b1	Non-matrisome	Non-matrisome	120.152	119.552	113.506	117.737	5.7715	21.6431	88.0154	38.4767	-79.2603	78.1068	-3.50656	0.0170438	0.0567176	-2.72808
Sptan1	Non-matrisome	Non-matrisome	172.096	260.954	248.944	227.331	5.7715	43.2862	150.059	66.3722	-160.959	146.852	-3.49686	0.0172221	0.0569363	-2.73822
Sptan1	Non-matrisome	Non-matrisome	172.096	258.893	248.944	226.644	5.7715	43.2862	150.059	66.3722	-160.272	146.508	-3.49686	0.0172221	0.0569363	-2.73822
Cav1	Non-matrisome	Non-matrisome	3.67277	3.298	1.92383	2.96487	5.7715	NA	7.21437	6.49294	3.5274	4.3761	3.9118	0.0171916	0.0569363	-2.57926
S0p23	Non-matrisome	Non-matrisome	7.34554	7.83275	7.69533	7.62454	5.7715	1.44287	1.44287	2.88575	-4.73879	5.25515	-3.4952	0.0172527	0.0569363	-2.73995
Eif1	Non-matrisome	Non-matrisome	NA	7.00825	6.15627	6.58226	NA	1.44287	2.88575	2.16431	-4.41795	4.37329	-4.77069	0.0172172	0.0569363	-2.45927
E0h	Non-matrisome	Non-matrisome	12.5924	14.0165	9.61917	12.076	NA	NA	1.44287	1.44287	-10.643	9.41773	-4.76834	0.0172405	0.0569363	-2.52384
Ipo7	Non-matrisome	Non-matrisome	12.0677	14.0165	11.543	12.5424	5.7715	NA	NA	5.7715	-6.77281	10.8497	-4.75628	0.0173603	0.057099	-2.52877
Psme2	Non-matrisome	Non-matrisome	9.44427	8.245	6.54103	8.07677	5.7715	2.88575	2.88575	3.84767	-4.2291	5.96222	-3.48896	0.0173689	0.057099	-2.7465
Tbl1xr1	Non-matrisome	Non-matrisome	6.82086	9.894	8.46487	8.39324	5.7715	1.44287	2.88575	3.36671	-5.02653	5.87998	-3.48869	0.0173738	0.057099	-2.74678
Gucy1a1	Non-matrisome	Non-matrisome	2.09873	1.649	2.3086	2.01878	5.7715	NA	NA	5.7715	3.75305	2.95696	4.75149	0.0174082	0.0571334	-2.53074
Cops7a	Non-matrisome	Non-matrisome	6.82086	8.245	7.69533	7.58706	NA	NA	2.88575	2.88575	-4.70088	6.41174	-4.74818	0.0174414	0.0571636	-2.53209
Hibch	Non-matrisome	Non-matrisome	5.24682	6.18375	6.54103	5.99053	NA	NA	1.44287	1.44287	-4.54544	4.85362	-4.74156	0.017508	0.0573033	-2.53481
Esyt1	Non-matrisome	Non-matrisome	15.7405	13.6042	13.8516	14.3988	5.7715	11.543	8.65725	8.65725	-5.74152	11.528	-3.47168	0.0176948	0.0577913	-2.76464
Hnrnpdl	Non-matrisome	Non-matrisome	15.2158	NA	13.4668	14.3413	5.7715	NA	8.65725	7.21437	-7.12693	10.7778	-4.72212	0.0177056	0.0577913	-2.48175
Sptan1	Non-matrisome	Non-matrisome	172.096	260.954	253.176	228.742	5.7715	43.2862	151.502	66.8532	-161.889	147.798	-3.46927	0.0177408	0.0578071	-2.76717
Sptan1	Non-matrisome	Non-matrisome	172.096	258.893	253.176	228.055	5.7715	43.2862	151.502	66.8532	-161.202	147.454	-3.46833	0.0177589	0.0578071	-2.76816
Mgat2	Non-matrisome	Non-matrisome	1.57405	2.06125	2.3086	1.9813	5.7715	NA	NA	5.7715	3.78856	2.92885	4.7099	0.0178312	0.0579636	-2.54791
Vcp	Non-matrisome	Non-matrisome	129.596	149.234	134.668	137.833	5.7715	30.3004	102.444	46.172	-91.6611	92.0025	-3.46172	0.0178858	0.0580619	-2.77511
Atp5pb	Non-matrisome	Non-matrisome	22.0366	28.033	23.8555	24.6417	5.7715	10.1001	18.7574	11.543	-13.0987	18.0924	-3.45922	0.0179343	0.058102	-2.77775
Ndufa11	Non-matrisome	Non-matrisome	NA	0.41225	NA	0.41225	NA	7.21437	7.21437	7.21437	6.80212	4.947	7.25005	0.0179712	0.058102	-2.69175
Eps15	Non-matrisome	Non-matrisome	7.34554	10.3062	9.61917	9.09032	NA	NA	1.44287	1.44287	-7.64531	7.17846	-4.69647	0.0179707	0.058102	-2.55351
Hnrnpd	Non-matrisome	Non-matrisome	35.6784	35.8657	28.8575	33.4672	5.7715	18.7574	23.086	15.8716	-17.5956	24.6694	-3.45056	0.0181028	0.0583266	-2.78688
Gmppa	Non-matrisome	Non-matrisome	1.57405	2.88575	3.07813	2.51264	5.7715	4.32862	7.21437	5.7715	3.25886	4.14207	3.45149	0.0180845	0.0583266	-2.78589
D0ja1	Non-matrisome	Non-matrisome	15.7405	10.3062	11.1582	12.4016	5.7715	7.21437	1.44287	4.80958	-7.59206	8.60561	-3.44998	0.018114	0.0583266	-2.78749
Calu	Non-matrisome	Non-matrisome	42.4992	22.6737	20.7774	28.6501	5.7715	2.88575	10.1001	6.25246	-22.3977	17.4513	-3.44598	0.0181925	0.0584218	-2.79171
Ptgis	Non-matrisome	Non-matrisome	6.82086	9.48175	8.46487	8.25583	NA	1.44287	NA	1.44287	-6.80801	6.55259	-4.67569	0.0181893	0.0584218	-2.56222
Ctnnbl1	Non-matrisome	Non-matrisome	9.44427	7.4205	8.84963	8.57147	NA	NA	2.88575	2.88575	-5.6846	7.15004	-4.67023	0.0182473	0.0585189	-2.56451
Lm0	Non-matrisome	Non-matrisome	34.1043	40.4005	33.4747	35.9932	5.7715	11.543	27.4146	14.9097	-21.0835	25.4514	-3.44179	0.0182753	0.0585299	-2.79614
Pecam1	Non-matrisome	Non-matrisome	3.67277	4.1225	3.4629	3.75272	5.7715	7.21437	NA	6.49294	2.7408	4.84881	3.83708	0.0183233	0.0586052	-2.63864
Tpm2	Non-matrisome	Non-matrisome	21.512	12.7797	16.1602	16.8173	5.7715	1.44287	10.1001	5.7715	-11.0458	11.2944	-3.43553	0.0183995	0.0586954	-2.80276
Psme3	Non-matrisome	Non-matrisome	11.0183	10.3062	6.15627	9.16028	NA	2.88575	1.44287	2.16431	-6.99971	6.36189	-3.83217	0.0184007	0.0586954	-2.64258
Snd1	Non-matrisome	Non-matrisome	62.4371	90.2827	87.7268	80.1489	5.7715	24.5289	54.8292	28.3765	-51.7723	54.2627	-3.43404	0.0184293	0.058708	-2.80434
Hbz	Non-matrisome	Non-matrisome	61.3878	67.609	55.4064	61.4677	5.7715	8.65725	46.172	20.2002	-41.2675	40.834	-3.42388	0.0186333	0.0592789	-2.8151
Apeh	Non-matrisome	Non-matrisome	9.96895	7.83275	10.3887	9.3968	5.7715	5.7715	7.21437	6.25246	-3.14434	7.82463	-3.42067	0.0186985	0.0594068	-2.8185
Lsm8	Non-matrisome	Non-matrisome	6.82086	8.245	10.0039	8.3566	5.7715	2.88575	4.32862	4.32862	-4.02797	6.34261	-3.41874	0.0187376	0.0594521	-2.82055
Sf1	Non-matrisome	Non-matrisome	19.9379	14.0165	11.9278	15.2941	5.7715	NA	1.44287	3.60719	-11.6843	10.6193	-3.80941	0.0187649	0.0594595	-2.6609
Pfn1	Non-matrisome	Non-matrisome	57.715	44.9352	38.8614	47.1706	5.7715	24.5289	28.8575	19.7193	-27.4513	33.4449	-3.41159	0.0188837	0.0596775	-2.82814
Ddx6	Non-matrisome	Non-matrisome	15.2158	20.6125	19.2383	18.3555	5.7715	NA	NA	5.7715	-12.5967	15.2095	-4.6028	0.0189839	0.0598579	-2.59324
Vcam1	Non-matrisome	Non-matrisome	1.04936	2.06125	1.92383	1.67815	5.7715	NA	NA	5.7715	4.09082	2.70149	4.60217	0.0189909	0.0598579	-2.59351
Txndc5	Non-matrisome	Non-matrisome	11.0183	23.086	19.6231	17.9091	5.7715	4.32862	8.65725	6.25246	-11.6567	12.0808	-3.40151	0.019092	0.060097	-2.83886
Gcn1	Non-matrisome	Non-matrisome	46.172	70.4947	65.0256	60.5641	5.7715	NA	NA	5.7715	-54.8506	46.8659	-4.55924	0.0194803	0.0612385	-2.61214
Prmt1	Non-matrisome	Non-matrisome	25.7094	28.033	28.088	27.2768	5.7715	11.543	21.6431	12.9859	-14.2909	20.1313	-3.38026	0.0195394	0.0613435	-2.86152
Dpysl2	Non-matrisome	Non-matrisome	39.3511	72.1437	58.4845	56.6598	5.7715	12.9859	34.629	17.7955	-38.8643	37.2276	-3.37245	0.0197069	0.061707	-2.86987
Pon3	Non-matrisome	Non-matrisome	2.09873	2.06125	1.1543	1.77143	5.7715	NA	NA	5.7715	4.00139	2.77144	4.54059	0.019698	0.061707	-2.62031
Cbr1	Non-matrisome	Non-matrisome	12.0677	10.3062	8.84963	10.4079	5.7715	NA	1.44287	3.60719	-6.80046	7.68759	-3.75086	0.019742	0.0617358	-2.70848
Snrpd3	Non-matrisome	Non-matrisome	15.2158	10.7185	11.1582	12.3642	5.7715	7.21437	8.65725	7.21437	-5.14979	9.78927	-3.36284	0.0199152	0.0621959	-2.88015
Capn2	Non-matrisome	Non-matrisome	8.91959	8.245	6.54103	7.90187	5.7715	1.44287	1.44287	2.88575	-5.01612	5.39381	-3.36053	0.0199655	0.0622715	-2.88262
Stip1	Non-matrisome	Non-matrisome	55.0916	73.7927	61.5627	63.4823	5.7715	21.6431	46.172	24.5289	-38.9535	44.0056	-3.35567	0.0200722	0.0623987	-2.88784
Mrps22	Non-matrisome	Non-matrisome	8.91959	9.0695	9.61917	9.20275	5.7715	NA	1.44287	3.60719	-5.5953	6.96453	-3.73114	0.0200847	0.0623987	-2.72466
Safb2	Non-matrisome	Non-matrisome	5.7715	9.48175	6.9258	7.39302	NA	1.44287	2.88575	2.16431	-5.22544	5.30153	-3.733	0.0200521	0.0623987	-2.72313
Nap1l4	Non-matrisome	Non-matrisome	20.9873	24.735	22.7012	22.8078	5.7715	1.44287	17.3145	8.17629	-14.6315	15.4921	-3.35387	0.0201118	0.0624016	-2.88977
Fam98b	Non-matrisome	Non-matrisome	11.543	9.894	10.3887	10.6086	5.7715	NA	NA	5.7715	-4.8333	9.3993	-4.49243	0.0202747	0.0627393	-2.64165
Cdc42	Non-matrisome	Non-matrisome	14.1664	9.894	10.3887	11.483	5.7715	NA	1.44287	3.60719	-7.87265	8.3327	-3.71898	0.0202996	0.0627393	-2.73467
Actn1	Non-matrisome	Non-matrisome	99.1649	108.009	101.194	102.789	5.7715	46.172	75.0295	42.3243	-60.465	72.5568	-3.33529	0.0205262	0.0630315	-2.90974
Eef1g	Non-matrisome	Non-matrisome	42.4992	46.5842	45.7872	44.9569	5.7715	18.7574	34.629	19.7193	-25.2376	32.3381	-3.33854	0.0204531	0.0630315	-2.90624
Scrn1	Non-matrisome	Non-matrisome	2.62341	2.4735	2.3086	2.4685	5.7715	NA	NA	5.7715	3.30362	3.29425	4.47387	0.0205029	0.0630315	-2.64997
Vil1	Non-matrisome	Non-matrisome	0.524682	2.06125	1.53907	1.375	5.7715	5.7715	2.88575	4.80958	3.43458	3.09229	3.33623	0.0205049	0.0630315	-2.90872
Actn4	Non-matrisome	Non-matrisome	117.529	149.234	136.592	134.452	5.7715	38.9576	99.5584	48.0958	-86.356	91.2738	-3.33179	0.0206053	0.0631932	-2.91351
Aak1	Non-matrisome	Non-matrisome	2.62341	2.06125	1.92383	2.20283	5.7715	NA	NA	5.7715	3.57036	3.095	4.44565	0.0208561	0.0637166	-2.66271
Apip	Non-matrisome	Non-matrisome	2.62341	2.06125	1.92383	2.20283	5.7715	NA	NA	5.7715	3.57036	3.095	4.44565	0.0208561	0.0637166	-2.66271
Ipo8	Non-matrisome	Non-matrisome	2.62341	2.06125	1.92383	2.20283	5.7715	NA	NA	5.7715	3.57036	3.095	4.44565	0.0208561	0.0637166	-2.66271
Lcp1	Non-matrisome	Non-matrisome	12.0677	12.3675	9.61917	11.3514	NA	4.32862	NA	4.32862	-7.01873	9.59574	-4.40695	0.0213535	0.0651527	-2.68038
Prkcsh	Non-matrisome	Non-matrisome	17.3145	12.3675	10.7735	13.4852	5.7715	NA	4.32862	5.05006	-8.43284	10.1111	-3.65925	0.0213957	0.0651982	-2.78428
Hnrnpc	Non-matrisome	Non-matrisome	68.7333	37.1025	57.3302	54.3887	5.7715	23.086	30.3004	19.7193	-34.6694	37.054	-3.29516	0.0214545	0.0652939	-2.95308
Cox4i1	Non-matrisome	Non-matrisome	15.2158	16.9022	15.7754	15.9645	5.7715	NA	11.543	8.65725	-7.30912	13.0416	-3.64517	0.0216644	0.0657648	-2.79607
Rbm25	Non-matrisome	Non-matrisome	12.5924	8.245	10.3887	10.4087	5.7715	7.21437	5.7715	6.25246	-4.15623	8.33057	-3.28686	0.0216524	0.0657648	-2.96208
Srpra	Non-matrisome	Non-matrisome	7.87023	9.48175	10.7735	9.37515	5.7715	5.7715	1.44287	4.32862	-5.04652	6.85189	-3.27102	0.0220358	0.0666546	-2.97929
Peg10	Non-matrisome	Non-matrisome	8.91959	6.596	6.9258	7.48046	NA	NA	1.44287	1.44287	-6.03982	5.97107	-4.35531	0.0220413	0.0666546	-2.70431
Mad1l1	Non-matrisome	Non-matrisome	5.24682	6.18375	6.9258	6.11879	NA	NA	1.44287	1.44287	-4.67266	4.94981	-4.35672	0.0220221	0.0666546	-2.70365
Mff	Non-matrisome	Non-matrisome	2.62341	2.4735	2.69337	2.59676	5.7715	NA	NA	5.7715	3.17485	3.39044	4.34265	0.0222143	0.0669453	-2.71024
Rabep1	Non-matrisome	Non-matrisome	2.62341	2.4735	2.69337	2.59676	5.7715	NA	NA	5.7715	3.17485	3.39044	4.34265	0.0222143	0.0669453	-2.71024
Ccdc47	Non-matrisome	Non-matrisome	12.0677	17.7267	18.4688	16.0877	NA	NA	1.44287	1.44287	-14.6353	12.4265	-4.33835	0.0222735	0.0669453	-2.71226
Sugt1	Non-matrisome	Non-matrisome	7.34554	10.7185	10.0039	9.35599	NA	NA	1.44287	1.44287	-7.91051	7.37771	-4.34064	0.0222419	0.0669453	-2.71118
Arfip1	Non-matrisome	Non-matrisome	3.14809	4.1225	3.4629	3.57783	NA	1.44287	1.44287	1.44287	-2.13409	2.72385	-3.61378	0.0222777	0.0669453	-2.8225
Hdgf	Non-matrisome	Non-matrisome	11.543	8.245	6.9258	8.9046	5.7715	2.88575	2.88575	3.84767	-5.05693	6.37613	-3.25497	0.0224321	0.0672846	-2.99677
Ints14	Non-matrisome	Non-matrisome	2.09873	2.4735	2.69337	2.42186	5.7715	NA	NA	5.7715	3.34833	3.25927	4.31057	0.0226605	0.0678392	-2.72537
Ncstn	Non-matrisome	Non-matrisome	12.0677	11.1307	10.0039	11.0675	5.7715	8.65725	2.88575	5.7715	-5.29595	8.41948	-3.24357	0.0227184	0.0679274	-3.00921
Sec23b	Non-matrisome	Non-matrisome	11.0183	14.0165	13.0821	12.7056	5.7715	NA	NA	5.7715	-6.94093	10.9721	-4.29813	0.0228366	0.0681953	-2.73128
Prpsap2	Non-matrisome	Non-matrisome	9.96895	8.245	10.0039	9.40596	5.7715	NA	1.44287	3.60719	-5.79643	7.08645	-3.58408	0.0228772	0.0682312	-2.84769
Aak1	Non-matrisome	Non-matrisome	2.62341	1.649	1.92383	2.06541	5.7715	NA	NA	5.7715	3.70833	2.99194	4.29101	0.0229382	0.0683278	-2.73468
Cavin1	Non-matrisome	Non-matrisome	12.5924	14.4287	15.3907	14.1373	5.7715	4.32862	11.543	7.21437	-6.92288	10.6758	-3.23165	0.0230224	0.0684874	-3.02226
Epn1	Non-matrisome	Non-matrisome	1.57405	2.4735	2.3086	2.11871	5.7715	NA	NA	5.7715	3.65059	3.03191	4.28328	0.0230492	0.0684874	-2.73838
Hyou1	Non-matrisome	Non-matrisome	60.3384	64.311	66.5646	63.738	5.7715	18.7574	50.5006	25.0098	-38.7282	44.3739	-3.22603	0.0231672	0.0685164	-3.02842
Rplp0	Non-matrisome	Non-matrisome	49.8448	45.7597	46.172	47.2588	5.7715	23.086	36.0719	21.6431	-25.6157	34.451	-3.22592	0.02317	0.0685164	-3.02853
Gpx1	Non-matrisome	Non-matrisome	4.19745	4.1225	4.6172	4.31238	5.7715	5.7715	7.21437	6.25246	1.94007	5.28242	3.22466	0.0232026	0.0685164	-3.02991
Nampt	Non-matrisome	Non-matrisome	2.62341	2.4735	1.92383	2.34025	5.7715	NA	NA	5.7715	3.43239	3.19806	4.27891	0.0231123	0.0685164	-2.74047
Isy01	Non-matrisome	Non-matrisome	6.82086	9.894	9.2344	8.64975	NA	NA	1.44287	1.44287	-7.20452	6.84803	-4.27397	0.0231837	0.0685164	-2.74284
Copg1	Non-matrisome	Non-matrisome	25.7094	30.0942	34.629	30.1442	5.7715	20.2002	18.7574	14.9097	-15.2345	22.527	-3.22183	0.0232762	0.068649	-3.03302
Nln	Non-matrisome	Non-matrisome	6.29618	8.245	9.2344	7.92519	5.7715	4.32862	4.32862	4.80958	-3.11561	6.36739	-3.22057	0.0233088	0.0686602	-3.0344
Mpst	Non-matrisome	Non-matrisome	7.34554	6.596	6.9258	6.95578	5.7715	2.88575	2.88575	3.84767	-3.10811	5.40172	-3.21189	0.0235361	0.0692443	-3.04393
Crnkl1	Non-matrisome	Non-matrisome	7.87023	9.894	6.9258	8.23001	NA	NA	1.44287	1.44287	-6.79239	6.53322	-4.2452	0.0236061	0.0693648	-2.75672
Ralb	Non-matrisome	Non-matrisome	10.4936	7.00825	7.69533	8.39907	5.7715	4.32862	4.32862	4.80958	-3.58949	6.60433	-3.20478	0.0237244	0.0696265	-3.05175
Me2	Non-matrisome	Non-matrisome	9.44427	10.7185	11.1582	10.4403	5.7715	NA	NA	5.7715	-4.67285	9.27313	-4.22167	0.0239589	0.0702286	-2.76816
Erc1	Non-matrisome	Non-matrisome	6.82086	5.35925	7.31057	6.49689	NA	NA	1.44287	1.44287	-5.05074	5.23339	-4.21463	0.0240658	0.0704551	-2.77161
Camk2d	Non-matrisome	Non-matrisome	2.62341	3.298	2.69337	2.87159	5.7715	15.8716	12.9859	11.543	8.67141	7.2073	3.18486	0.0242602	0.0706773	-3.07369
Uqcrfs1	Non-matrisome	Non-matrisome	12.0677	13.6042	10.7735	12.1485	5.7715	NA	NA	5.7715	-6.37729	10.5542	-4.20327	0.0242396	0.0706773	-2.77718
Rfc2	Non-matrisome	Non-matrisome	8.39491	12.7797	10.7735	10.6494	NA	1.44287	NA	1.44287	-9.19791	8.34775	-4.2023	0.0242544	0.0706773	-2.77765
Prim2	Non-matrisome	Non-matrisome	5.24682	3.298	4.23243	4.25908	NA	1.44287	1.44287	1.44287	-2.8182	3.1326	-3.51962	0.0242458	0.0706773	-2.90296
Commd1	Non-matrisome	Non-matrisome	2.62341	1.649	1.53907	1.93716	5.7715	NA	NA	5.7715	3.83711	2.89574	4.18958	0.0244511	0.0711466	-2.78392
Hnrnpul2	Non-matrisome	Non-matrisome	14.1664	17.7267	15.7754	15.8895	5.7715	12.9859	8.65725	9.13821	-6.75132	12.5139	-3.17058	0.0246528	0.0712945	-3.08946
Ddost	Non-matrisome	Non-matrisome	16.7898	28.4452	18.084	21.1064	5.7715	NA	7.21437	6.49294	-14.6282	15.261	-3.50223	0.0246315	0.0712945	-2.91801
Aak1	Non-matrisome	Non-matrisome	2.62341	2.06125	2.69337	2.45934	5.7715	NA	NA	5.7715	3.31282	3.28738	4.17487	0.0246812	0.0712945	-2.7912
Hacd3	Non-matrisome	Non-matrisome	2.62341	2.06125	1.53907	2.07458	5.7715	NA	NA	5.7715	3.69914	2.99881	4.17835	0.0246265	0.0712945	-2.78948
Piezo1	Non-matrisome	Non-matrisome	2.62341	2.06125	1.53907	2.07458	5.7715	NA	NA	5.7715	3.69914	2.99881	4.17835	0.0246265	0.0712945	-2.78948
Srm	Non-matrisome	Non-matrisome	8.39491	11.1307	12.6973	10.741	5.7715	NA	1.44287	3.60719	-7.13458	7.88747	-3.50127	0.0246531	0.0712945	-2.91885
Itga1	Non-matrisome	Non-matrisome	1.04936	1.23675	1.1543	1.1468	5.7715	20.2002	12.9859	12.9859	11.8391	7.06634	3.15989	0.0249513	0.0719876	-3.10129
Chid1	Non-matrisome	Non-matrisome	2.62341	2.88575	2.69337	2.73418	5.7715	NA	NA	5.7715	3.03688	3.49351	4.13398	0.0253352	0.0729189	-2.81162
Clasp1	Non-matrisome	Non-matrisome	11.0183	8.245	7.69533	8.98622	NA	NA	1.44287	1.44287	-7.54855	7.10038	-4.13457	0.0253256	0.0729189	-2.81133
Birc6	Non-matrisome	Non-matrisome	15.2158	15.2532	11.1582	13.8758	5.7715	10.1001	1.44287	5.7715	-8.10425	9.82363	-3.14299	0.0254318	0.0731086	-3.12004
Prps1l3	Non-matrisome	Non-matrisome	11.543	9.48175	8.46487	9.82987	5.7715	NA	1.44287	3.60719	-6.22198	7.3408	-3.46224	0.0255465	0.073208	-2.95286
Lima1	Non-matrisome	Non-matrisome	8.39491	10.3062	12.3125	10.3379	5.7715	1.44287	NA	3.60719	-6.73469	7.64561	-3.46173	0.0255584	0.073208	-2.9533
Pdlim1	Non-matrisome	Non-matrisome	5.7715	5.7715	4.6172	5.38673	NA	NA	1.44287	1.44287	-3.94696	4.40077	-4.12245	0.0255238	0.073208	-2.81743
Ppp1cb	Non-matrisome	Non-matrisome	10.4936	8.245	9.2344	9.32434	5.7715	NA	1.44287	3.60719	-5.71498	7.03748	-3.46012	0.0255962	0.0732285	-2.95471
Cpq	Non-matrisome	Non-matrisome	0.524682	0.8245	1.1543	0.834494	5.7715	2.88575	2.88575	3.84767	3.01317	2.34108	3.13622	0.025627	0.0732288	-3.12756
Lyrm4	Non-matrisome	Non-matrisome	1.57405	2.4735	1.92383	1.99046	NA	7.21437	4.32862	5.7715	3.78188	3.50288	3.45382	0.0257442	0.0734756	-2.96023
Emc1	Non-matrisome	Non-matrisome	13.117	11.9552	10.3887	11.8203	5.7715	NA	NA	5.7715	-6.0436	10.3081	-4.08984	0.0260665	0.0743067	-2.83398
Akr1e1	Non-matrisome	Non-matrisome	1.57405	2.06125	2.69337	2.10955	5.7715	NA	NA	5.7715	3.65979	3.02504	4.08596	0.0261322	0.0744049	-2.83596
Pcca	Non-matrisome	Non-matrisome	9.44427	10.3062	6.54103	8.76385	5.7715	1.44287	4.32862	3.84767	-4.91618	6.30576	-3.11776	0.0261683	0.0744189	-3.14811
Abcf1	Non-matrisome	Non-matrisome	6.82086	8.245	6.9258	7.33055	5.7715	1.44287	2.88575	3.36671	-3.96385	5.34863	-3.11663	0.0262021	0.0744263	-3.14938
Pls3	Non-matrisome	Non-matrisome	13.6417	23.086	13.8516	16.8598	5.7715	8.65725	8.65725	7.69533	-9.16444	12.2776	-3.11385	0.0262846	0.074572	-3.15247
Myl6	Non-matrisome	Non-matrisome	20.4626	23.086	25.7794	23.1093	5.7715	4.32862	18.7574	9.61917	-13.4902	16.3642	-3.10176	0.0266479	0.075513	-3.16598
Ccdc22	Non-matrisome	Non-matrisome	6.29618	8.65725	9.2344	8.06261	NA	NA	1.44287	1.44287	-6.61501	6.40768	-4.04852	0.0267761	0.0757861	-2.8552
Cxadr	Non-matrisome	Non-matrisome	2.62341	2.88575	3.84767	3.11894	5.7715	12.9859	8.65725	9.13821	6.01927	6.12857	3.09432	0.0268742	0.0759739	-3.1743
Npepps	Non-matrisome	Non-matrisome	14.1664	22.6737	17.3145	18.0516	5.7715	2.88575	12.9859	7.21437	-10.8372	12.633	-3.09184	0.0269501	0.0760333	-3.17707
Las1l	Non-matrisome	Non-matrisome	11.0183	6.596	9.2344	8.94957	NA	1.44287	4.32862	2.88575	-6.06799	6.52404	-3.40373	0.026959	0.0760333	-3.0044
Rock2	Non-matrisome	Non-matrisome	8.39491	10.7185	8.84963	9.32101	5.7715	NA	1.44287	3.60719	-5.71664	7.03548	-3.40164	0.0270112	0.0760905	-3.00626
Myl9	Non-matrisome	Non-matrisome	17.3145	10.7185	14.2364	14.0898	5.7715	NA	7.21437	6.49294	-7.59006	11.051	-3.39739	0.0271176	0.0763003	-3.01003
Ank2	Non-matrisome	Non-matrisome	5.24682	4.53475	5.7715	5.18436	NA	NA	1.44287	1.44287	-3.73911	4.24899	-4.0213	0.0272569	0.0766019	-2.86934
Vars	Non-matrisome	Non-matrisome	NA	0.41225	NA	0.41225	NA	7.21437	8.65725	7.93581	7.52647	5.42796	5.84935	0.0273227	0.0766964	-2.87438
G0o1	Non-matrisome	Non-matrisome	12.0677	12.3675	15.3907	13.2753	5.7715	NA	NA	5.7715	-7.50865	11.3993	-4.00458	0.0275579	0.0772658	-2.87809
Eci1	Non-matrisome	Non-matrisome	8.39491	16.49	14.2364	13.0404	5.7715	1.44287	7.21437	4.80958	-8.23084	8.925	-3.06697	0.027725	0.0775597	-3.20497
Smpdl3b	Non-matrisome	Non-matrisome	NA	1.649	1.92383	1.78642	NA	4.32862	4.32862	4.32862	2.54221	3.05752	3.99347	0.0277603	0.0775597	-2.86194
Pik3ap1	Non-matrisome	Non-matrisome	6.82086	7.4205	6.9258	7.05572	5.7715	1.44287	1.44287	2.88575	-4.16997	4.97074	-3.06672	0.0277328	0.0775597	-3.20524
Cyp20a1	Non-matrisome	Non-matrisome	11.543	13.6042	10.7735	11.9736	5.7715	NA	NA	5.7715	-6.20381	10.4231	-3.98732	0.0278731	0.0777838	-2.88718
Add1	Non-matrisome	Non-matrisome	12.5924	8.65725	9.2344	10.1613	5.7715	NA	2.88575	4.32862	-5.82968	7.82825	-3.36622	0.0279133	0.0778051	-3.03781
Ube4b	Non-matrisome	Non-matrisome	11.0183	13.6042	11.1582	11.9269	5.7715	NA	NA	5.7715	-6.1591	10.3881	-3.97861	0.0280339	0.0780502	-2.89178
Eng	Non-matrisome	Non-matrisome	1.57405	3.71025	3.07813	2.78748	5.7715	15.8716	11.543	11.062	8.27456	6.92476	3.05504	0.0281057	0.0781588	-3.21839
Cnp	Non-matrisome	Non-matrisome	2.62341	1.23675	NA	1.93008	5.7715	7.21437	4.32862	5.7715	3.83851	4.23493	3.35315	0.0282552	0.0783917	-3.04952
Ubqln1	Non-matrisome	Non-matrisome	27.2835	21.0247	18.8536	22.3873	5.7715	NA	NA	5.7715	-16.596	18.2333	-3.9682	0.0282276	0.0783917	-2.8973
Ddah2	Non-matrisome	Non-matrisome	12.0677	9.48175	8.46487	10.0048	5.7715	NA	1.44287	3.60719	-6.39652	7.44573	-3.35101	0.0283117	0.0784573	-3.05144
Nup62	Non-matrisome	Non-matrisome	7.87023	11.9552	12.3125	10.7127	5.7715	NA	2.88575	4.32862	-6.38655	8.15905	-3.34929	0.028357	0.0784917	-3.05298
Tomm40	Non-matrisome	Non-matrisome	11.543	17.7267	18.4688	15.9128	5.7715	10.1001	10.1001	8.65725	-7.2556	12.285	-3.03958	0.0286075	0.0790933	-3.23581
Etfb	Non-matrisome	Non-matrisome	12.5924	14.841	14.6211	14.0182	5.7715	2.88575	11.543	6.73342	-7.28475	10.3758	-3.03825	0.0286511	0.0791221	-3.23731
Cyfip1	Non-matrisome	Non-matrisome	19.9379	14.0165	17.6993	17.2179	5.7715	NA	NA	5.7715	-11.4354	14.3563	-3.93602	0.0288374	0.0795157	-2.91448
Rcc1	Non-matrisome	Non-matrisome	9.44427	9.48175	7.31057	8.74553	5.7715	NA	2.88575	4.32862	-4.41839	6.97877	-3.33047	0.0288603	0.0795157	-3.06992
Chordc1	Non-matrisome	Non-matrisome	5.7715	7.4205	8.46487	7.21895	NA	1.44287	NA	1.44287	-5.77527	5.77493	-3.93274	0.0289007	0.0795352	-2.91624
Atp5f1b	Non-matrisome	Non-matrisome	273.884	263.428	262.411	266.574	5.7715	51.9435	217.874	91.863	-174.711	179.219	-3.02899	0.0289571	0.0795988	-3.24777
Ube2g1	Non-matrisome	Non-matrisome	3.67277	0.41225	1.1543	1.74644	5.7715	8.65725	4.32862	6.25246	4.50602	3.99945	3.01874	0.0293	0.0803254	-3.25936
Paox	Non-matrisome	Non-matrisome	2.62341	2.4735	1.53907	2.21199	5.7715	NA	NA	5.7715	3.56117	3.10187	3.91105	0.0293225	0.0803254	-2.92794
Cox5a	Non-matrisome	Non-matrisome	9.44427	13.6042	15.7754	12.9413	5.7715	8.65725	1.44287	5.29054	-7.65078	9.11593	-3.01923	0.0292833	0.0803254	-3.2588
Mrps14	Non-matrisome	Non-matrisome	2.62341	2.4735	3.07813	2.72501	5.7715	NA	NA	5.7715	3.04608	3.48664	3.89654	0.0296091	0.0810175	-2.93581
Eif5a	Non-matrisome	Non-matrisome	9.96895	13.6042	11.543	11.7054	5.7715	8.65725	1.44287	5.29054	-6.41486	8.49797	-3.0022	0.0298629	0.0814318	-3.2781
Apoe	Non-matrisome	Non-matrisome	8.39491	11.9552	8.84963	9.73326	5.7715	NA	4.32862	5.05006	-4.68768	7.85998	-3.29488	0.0298409	0.0814318	-3.10213
Txndc12	Non-matrisome	Non-matrisome	7.87023	9.48175	10.7735	9.37515	5.7715	NA	1.44287	3.60719	-5.76817	7.06796	-3.29489	0.0298407	0.0814318	-3.10212
Ywhab	Non-matrisome	Non-matrisome	69.7827	30.9187	39.2462	46.6492	5.7715	4.32862	23.086	11.062	-35.5872	28.8556	-2.99995	0.0299406	0.0815505	-3.28066
Unc45a	Non-matrisome	Non-matrisome	4.19745	4.53475	4.23243	4.32155	NA	NA	1.44287	1.44287	-2.87903	3.60188	-3.86882	0.0301666	0.0820723	-2.95095
Cirbp	Non-matrisome	Non-matrisome	1.57405	1.23675	2.69337	1.83472	5.7715	NA	NA	5.7715	3.93573	2.81892	3.86256	0.0302943	0.0823261	-2.95439
Eif3b	Non-matrisome	Non-matrisome	33.5796	53.5925	49.2501	45.4741	5.7715	17.3145	33.1861	18.7574	-26.7167	32.1157	-2.97912	0.0306688	0.0832489	-3.30434
Hnrnph2	Non-matrisome	Non-matrisome	47.746	111.307	94.6526	84.5687	5.7715	23.086	46.172	25.0098	-59.5589	54.7893	-2.97708	0.0307411	0.0833504	-3.30666
Sf3b5	Non-matrisome	Non-matrisome	6.82086	8.65725	9.61917	8.36576	5.7715	5.7715	2.88575	4.80958	-3.55618	6.58767	-2.97112	0.0309538	0.0837368	-3.31345
Usp14	Non-matrisome	Non-matrisome	7.87023	12.3675	12.3125	10.8501	5.7715	NA	1.44287	3.60719	-7.24596	7.95293	-3.25675	0.0309354	0.0837368	-3.13692
Atp6v1b2	Non-matrisome	Non-matrisome	8.91959	8.65725	9.61917	9.06534	5.7715	NA	NA	5.7715	-3.29442	8.24188	-3.82376	0.0311021	0.0840426	-2.97586
Nvl	Non-matrisome	Non-matrisome	8.91959	9.48175	10.3887	9.59668	5.7715	NA	NA	5.7715	-3.82791	8.64038	-3.80896	0.0314173	0.0847024	-2.98412
Rheb	Non-matrisome	Non-matrisome	2.62341	2.06125	1.1543	1.94632	5.7715	NA	NA	5.7715	3.82791	2.90261	3.80896	0.0314173	0.0847024	-2.98412
Ndufa13	Non-matrisome	Non-matrisome	14.1664	10.7185	13.0821	12.6557	5.7715	NA	NA	5.7715	-6.87807	10.9346	-3.79989	0.0316126	0.0850071	-2.98921
Aak1	Non-matrisome	Non-matrisome	2.62341	1.649	2.69337	2.32193	5.7715	NA	NA	5.7715	3.45079	3.18432	3.79875	0.0316372	0.0850071	-2.98984
Nup35	Non-matrisome	Non-matrisome	5.7715	8.65725	7.69533	7.37469	NA	NA	1.44287	1.44287	-5.93053	5.89174	-3.80014	0.0316072	0.0850071	-2.98907
Celf1	Non-matrisome	Non-matrisome	9.44427	21.437	23.4708	18.1173	NA	1.44287	2.88575	2.16431	-15.9356	11.7361	-3.22807	0.03179	0.0853216	-3.16328
Nt5c3a	Non-matrisome	Non-matrisome	1.57405	2.88575	1.92383	2.12788	5.7715	NA	NA	5.7715	3.64139	3.03878	3.77202	0.0322224	0.086385	-3.00492
Ywhae	Non-matrisome	Non-matrisome	133.794	144.287	128.897	135.659	5.7715	46.172	111.101	54.3483	-81.3111	95.0038	-2.932	0.0323905	0.0866222	-3.35815
Skiv2l	Non-matrisome	Non-matrisome	7.87023	7.4205	6.15627	7.149	5.7715	1.44287	2.88575	3.36671	-3.78229	5.25785	-2.93122	0.0324198	0.0866222	-3.35904
Afg3l2	Non-matrisome	Non-matrisome	5.7715	8.65725	8.0801	7.50295	NA	1.44287	NA	1.44287	-6.05542	5.98793	-3.76377	0.0324059	0.0866222	-3.0096
Stxbp2	Non-matrisome	Non-matrisome	7.87023	6.596	6.54103	7.00242	5.7715	1.44287	1.44287	2.88575	-4.11667	4.94408	-2.92745	0.0325625	0.0869063	-3.36337
Itga3	Non-matrisome	Non-matrisome	2.09873	2.06125	1.53907	1.89968	5.7715	21.6431	14.4287	13.9478	12.0481	7.92374	2.92043	0.0328298	0.0872085	-3.37143
Cfb	Non-matrisome	Non-matrisome	1.04936	NA	0.769533	0.909448	5.7715	NA	10.1001	7.93581	7.02636	4.42263	3.74645	0.0327953	0.0872085	-3.01108
Ctdp1	Non-matrisome	Non-matrisome	3.14809	2.4735	2.3086	2.6434	5.7715	NA	NA	5.7715	3.13014	3.42542	3.74516	0.0328244	0.0872085	-3.0202
Prpf39	Non-matrisome	Non-matrisome	3.14809	2.4735	2.3086	2.6434	5.7715	NA	NA	5.7715	3.13014	3.42542	3.74516	0.0328244	0.0872085	-3.0202
Gbe1	Non-matrisome	Non-matrisome	2.09873	2.4735	3.07813	2.55012	5.7715	NA	NA	5.7715	3.21956	3.35546	3.74366	0.0328585	0.0872085	-3.02106
Ndufa4	Non-matrisome	Non-matrisome	3.67277	3.298	5.38673	4.11917	NA	7.21437	11.543	9.37869	5.26042	6.22298	3.19044	0.0329538	0.0873643	-3.19812
Atp5me	Non-matrisome	Non-matrisome	25.1847	17.7267	13.8516	18.921	5.7715	5.7715	12.9859	8.17629	-10.7447	13.5487	-2.91469	0.0330498	0.0875214	-3.37801
Srprb	Non-matrisome	Non-matrisome	12.5924	11.9552	12.6973	12.415	5.7715	1.44287	10.1001	5.7715	-6.64347	9.09323	-2.91352	0.0330949	0.0875436	-3.37935
Uchl5	Non-matrisome	Non-matrisome	9.44427	15.6655	13.8516	12.9871	NA	NA	1.44287	1.44287	-11.5408	10.1011	-3.7268	0.0332442	0.0877462	-3.03073
Fnbp1l	Non-matrisome	Non-matrisome	4.19745	5.35925	5.00197	4.85289	NA	NA	1.44287	1.44287	-3.40941	4.00039	-3.72677	0.033245	0.0877462	-3.03075
Rps17	Non-matrisome	Non-matrisome	34.1043	51.9435	48.0958	44.7145	5.7715	20.2002	33.1861	19.7193	-24.9953	32.2169	-2.90553	0.0334049	0.0880709	-3.38854
Adsl	Non-matrisome	Non-matrisome	13.117	10.3062	8.46487	10.6294	5.7715	7.21437	7.21437	6.73342	-3.89597	8.6814	-2.9022	0.0335351	0.0881218	-3.39238
Ssbp1	Non-matrisome	Non-matrisome	2.62341	2.4735	1.53907	2.21199	NA	7.21437	4.32862	5.7715	3.55868	3.63579	3.1728	0.0335167	0.0881218	-3.21455
Hnrnpul1	Non-matrisome	Non-matrisome	8.39491	8.245	11.543	9.3943	5.7715	NA	2.88575	4.32862	-5.06336	7.36803	-3.17227	0.0335339	0.0881218	-3.21504
Erlin1	Non-matrisome	Non-matrisome	7.34554	7.83275	8.0801	7.7528	5.7715	NA	2.88575	4.32862	-3.42433	6.38313	-3.16788	0.0336757	0.0883942	-3.21914
Selenof	Non-matrisome	Non-matrisome	1.57405	2.4735	1.92383	1.99046	5.7715	2.88575	5.7715	4.80958	2.81912	3.40002	2.89099	0.033977	0.089087	-3.40528
Xrcc6	Non-matrisome	Non-matrisome	9.44427	17.7267	12.6973	13.2894	5.7715	NA	1.44287	3.60719	-9.6912	9.41654	-3.15614	0.0340586	0.0892028	-3.23012
Ppic	Non-matrisome	Non-matrisome	6.29618	9.0695	8.46487	7.94352	5.7715	4.32862	1.44287	3.84767	-4.09585	5.89559	-2.88508	0.0342128	0.0895085	-3.4121
Dcaf8	Non-matrisome	Non-matrisome	NA	2.06125	1.1543	1.60777	NA	4.32862	5.7715	5.05006	3.44229	3.32892	3.68303	0.0342732	0.0895684	-3.05119
Aldh6a1	Non-matrisome	Non-matrisome	9.44427	8.65725	7.69533	8.59895	5.7715	NA	1.44287	3.60719	-4.99188	6.60225	-3.14425	0.0344519	0.0898385	-3.24127
Klc1	Non-matrisome	Non-matrisome	6.29618	7.83275	6.9258	7.01824	5.7715	1.44287	2.88575	3.36671	-3.65154	5.19248	-2.87942	0.0344404	0.0898385	-3.41863
Lrrc47	Non-matrisome	Non-matrisome	16.2651	10.7185	9.61917	12.2009	5.7715	NA	1.44287	3.60719	-8.59076	8.76343	-3.137	0.034694	0.0902726	-3.24808
Scp2	Non-matrisome	Non-matrisome	8.91959	17.7267	14.6211	13.7558	5.7715	NA	1.44287	3.60719	-10.1566	9.69637	-3.13791	0.0346637	0.0902726	-3.24723
Arf3	Non-matrisome	Non-matrisome	34.629	25.1472	24.2403	28.0055	5.7715	12.9859	21.6431	13.4668	-14.5387	20.7362	-2.86594	0.0349888	0.0909403	-3.4342
Bzw2	Non-matrisome	Non-matrisome	11.543	7.83275	8.84963	9.40846	5.7715	NA	2.88575	4.32862	-5.07666	7.37653	-3.1197	0.0352804	0.0914989	-3.26438
Hsp90aa1	Non-matrisome	Non-matrisome	186.262	230.035	235.092	217.13	5.7715	92.344	170.259	89.4582	-127.672	153.294	-2.85356	0.0355009	0.0919708	-3.44853
Tuba1c	Non-matrisome	Non-matrisome	NA	188.81	159.678	174.244	NA	57.715	111.101	84.4082	-89.8361	129.326	-3.62875	0.0356061	0.0921434	-3.08613
Cops6	Non-matrisome	Non-matrisome	7.87023	12.7797	10.0039	10.218	NA	NA	1.44287	1.44287	-8.77596	8.0242	-3.61585	0.0359328	0.092888	-3.09569
Rpl7	Non-matrisome	Non-matrisome	25.1847	43.2862	46.172	38.2143	5.7715	15.8716	25.9717	15.8716	-22.3427	27.043	-2.8356	0.0362589	0.0936297	-3.46936
Ank3	Non-matrisome	Non-matrisome	15.2158	NA	18.4688	16.8423	5.7715	NA	NA	5.7715	-11.0773	13.152	-5.04478	0.0363176	0.0936797	-3.02944
Srp54	Non-matrisome	Non-matrisome	11.543	22.2615	22.3165	18.707	5.7715	11.543	8.65725	8.65725	-10.0497	13.6821	-2.82298	0.0368023	0.0948276	-3.48402
Cyc1	Non-matrisome	Non-matrisome	9.96895	13.192	16.1602	13.1071	5.7715	10.1001	4.32862	6.73342	-6.37363	9.92023	-2.81823	0.037009	0.0952572	-3.48954
Canx	Non-matrisome	Non-matrisome	51.4188	65.5477	54.6369	57.2011	5.7715	20.2002	47.6149	24.5289	-32.6723	40.865	-2.80951	0.0373921	0.095729	-3.49969
Herpud1	Non-matrisome	Non-matrisome	1.04936	NA	1.1543	1.10183	5.7715	NA	NA	5.7715	4.66946	2.65839	4.96539	0.037433	0.095729	-3.04748
Me1	Non-matrisome	Non-matrisome	1.04936	NA	1.1543	1.10183	5.7715	NA	NA	5.7715	4.66946	2.65839	4.96539	0.037433	0.095729	-3.04748
Gm2a	Non-matrisome	Non-matrisome	0.524682	2.06125	2.3086	1.63151	5.7715	NA	NA	5.7715	4.13553	2.66651	3.55847	0.0374321	0.095729	-3.13021
Hp1bp3	Non-matrisome	Non-matrisome	14.6911	5.35925	13.4668	11.1724	5.7715	1.44287	1.44287	2.88575	-8.28664	7.02907	-2.81009	0.0373668	0.095729	-3.49902
Rap2a	Non-matrisome	Non-matrisome	NA	3.71025	5.00197	4.35611	NA	1.44287	1.44287	1.44287	-2.91323	2.89949	-3.55924	0.0374114	0.095729	-3.1317
Qsox1	Non-matrisome	Non-matrisome	3.67277	2.06125	2.3086	2.68087	5.7715	15.8716	21.6431	14.4287	11.7479	8.55481	2.80414	0.0376304	0.096028	-3.50596
Ube3c	Non-matrisome	Non-matrisome	3.14809	3.298	3.07813	3.17474	5.7715	NA	NA	5.7715	2.59665	3.82393	3.55177	0.0376123	0.096028	-3.13429
Rps6ka3	Non-matrisome	Non-matrisome	16.7898	13.192	12.3125	14.0981	5.7715	NA	NA	5.7715	-8.31577	12.0165	-3.5435	0.0378364	0.0964504	-3.13933
Top1	Non-matrisome	Non-matrisome	12.5924	18.9635	21.5469	17.7009	5.7715	8.65725	12.9859	9.13821	-8.56272	13.4196	-2.79736	0.0379335	0.0965947	-3.51386
Man2b2	Non-matrisome	Non-matrisome	1.04936	1.23675	NA	1.14306	5.7715	NA	NA	5.7715	4.62807	2.68587	4.89658	0.0384408	0.0976782	-3.06357
Mrpl54	Non-matrisome	Non-matrisome	1.04936	1.23675	NA	1.14306	5.7715	NA	NA	5.7715	4.62807	2.68587	4.89658	0.0384408	0.0976782	-3.06357
Trap1	Non-matrisome	Non-matrisome	35.6784	62.662	67.7189	55.3531	NA	24.5289	17.3145	20.9217	-34.3918	41.5805	-3.02698	0.0386285	0.0980507	-3.35273
Sdhb	Non-matrisome	Non-matrisome	7.34554	11.543	10.3887	9.75908	5.7715	1.44287	NA	3.60719	-6.15316	7.29832	-3.02551	0.0386844	0.0980882	-3.35415
Eno3	Non-matrisome	Non-matrisome	NA	39.1637	21.1622	30.163	NA	4.32862	4.32862	4.32862	-25.8343	17.2458	-3.5079	0.0388203	0.0983282	-3.16598
Acy1	Non-matrisome	Non-matrisome	2.09873	1.649	3.07813	2.27529	5.7715	NA	NA	5.7715	3.4955	3.14934	3.50207	0.0389845	0.0986394	-3.16478
Banf1	Non-matrisome	Non-matrisome	9.96895	8.65725	10.3887	9.67163	5.7715	NA	NA	5.7715	-3.89894	8.6966	-3.49314	0.0392376	0.0991747	-3.17031
Asl	Non-matrisome	Non-matrisome	4.19745	2.88575	3.84767	3.64362	5.7715	7.21437	11.543	8.17629	4.53267	5.90996	2.76576	0.0393817	0.0993286	-3.5508
Btf3l4	Non-matrisome	Non-matrisome	8.91959	9.48175	10.0039	9.46842	5.7715	5.7715	8.65725	6.73342	-2.73501	8.10092	-2.76609	0.0393665	0.0993286	-3.55042
Vps33a	Non-matrisome	Non-matrisome	3.14809	3.298	2.69337	3.04649	5.7715	NA	NA	5.7715	2.72542	3.72774	3.48636	0.0394314	0.0993488	-3.17452
Tfrc	Non-matrisome	Non-matrisome	24.1354	17.7267	11.9278	17.93	5.7715	7.21437	11.543	8.17629	-9.75367	13.0531	-2.76248	0.0395356	0.0994014	-3.55464
Mgst3	Non-matrisome	Non-matrisome	1.04936	1.649	0.769533	1.15597	5.7715	2.88575	2.88575	3.84767	2.6917	2.50182	2.76006	0.0396499	0.0995838	-3.55748
Hnrnpa3	Non-matrisome	Non-matrisome	96.5414	64.7232	92.7288	84.6645	5.7715	12.9859	69.258	29.3385	-55.326	57.0015	-2.75548	0.0398662	0.0999225	-3.56285
Anp32e	Non-matrisome	Non-matrisome	9.44427	10.3062	8.46487	9.40513	5.7715	1.44287	7.21437	4.80958	-4.59555	7.10736	-2.75455	0.0399104	0.0999225	-3.56394
Lbr	Non-matrisome	Non-matrisome	5.7715	5.35925	5.38673	5.50583	NA	NA	2.88575	2.88575	-2.62056	4.85081	-3.46991	0.0399064	0.0999225	-3.18478
Ubc	Non-matrisome	Non-matrisome	61.9124	46.9965	54.6369	54.5153	5.7715	17.3145	46.172	23.086	-31.4293	38.8006	-2.75281	0.0399931	0.100025	-3.56598
Sucla2	Non-matrisome	Non-matrisome	20.9873	10.3062	11.9278	14.4071	NA	1.44287	4.32862	2.88575	-11.5346	9.79856	-2.98803	0.0401447	0.100299	-3.39035
Metap2	Non-matrisome	Non-matrisome	9.96895	9.48175	8.46487	9.30519	5.7715	NA	NA	5.7715	-3.53101	8.42177	-3.45426	0.0403649	0.10069	-3.19458
Mecr	Non-matrisome	Non-matrisome	5.24682	5.35925	7.31057	5.97221	NA	NA	1.44287	1.44287	-4.52394	4.83988	-3.45356	0.0403856	0.10069	-3.19502
Man2b1	Non-matrisome	Non-matrisome	6.29618	7.4205	6.15627	6.62432	5.7715	2.88575	2.88575	3.84767	-2.77665	5.23599	-2.74308	0.0404594	0.100769	-3.57741
Ddx18	Non-matrisome	Non-matrisome	9.44427	10.3062	11.9278	10.5594	5.7715	NA	NA	5.7715	-4.79242	9.36245	-3.44827	0.0405422	0.100869	-3.19835
Fkbp3	Non-matrisome	Non-matrisome	13.117	21.0247	21.5469	18.5629	5.7715	2.88575	14.4287	7.69533	-10.8676	13.1291	-2.73865	0.0406736	0.101091	-3.58261
Wdfy1	Non-matrisome	Non-matrisome	1.57405	2.88575	2.69337	2.38439	5.7715	NA	NA	5.7715	3.38385	3.23117	3.43986	0.0407929	0.101159	-3.20365
Ddx19a	Non-matrisome	Non-matrisome	NA	11.543	9.61917	10.5811	NA	1.44287	5.7715	3.60719	-6.9739	7.09413	-3.44004	0.0407876	0.101159	-3.21208
Pogz	Non-matrisome	Non-matrisome	6.82086	10.7185	11.1582	9.56586	NA	NA	1.44287	1.44287	-8.11657	7.53512	-3.43868	0.0408282	0.101159	-3.20439
Atl2	Non-matrisome	Non-matrisome	4.72214	4.1225	6.15627	5.0003	NA	2.88575	1.44287	2.16431	-2.83543	3.86591	-2.96523	0.0410648	0.101534	-3.41251
Hnrnpab	Non-matrisome	Non-matrisome	39.3511	42.874	46.5568	42.9273	5.7715	14.4287	37.5147	19.2383	-23.689	31.0828	-2.72579	0.0413027	0.101987	-3.59774
Pmm2	Non-matrisome	Non-matrisome	NA	0.8245	0.384767	0.604633	NA	2.88575	4.32862	3.60719	3.00255	2.10591	3.42195	0.0413333	0.101987	-3.22453
Marcksl1	Non-matrisome	Non-matrisome	11.543	10.7185	6.9258	9.7291	NA	NA	1.44287	1.44287	-8.29752	7.65754	-3.4178	0.0414598	0.10218	-3.21762
Ubap2l	Non-matrisome	Non-matrisome	8.39491	13.6042	9.61917	10.5394	NA	NA	1.44287	1.44287	-9.10028	8.2653	-3.41657	0.0414973	0.10218	-3.2184
Igf2bp3	Non-matrisome	Non-matrisome	24.66	42.0495	35.7833	34.1643	NA	NA	5.7715	5.7715	-28.3863	27.0661	-3.41186	0.0416417	0.10243	-3.2214
Rpa3	Non-matrisome	Non-matrisome	6.82086	6.18375	8.46487	7.15649	5.7715	2.88575	4.32862	4.32862	-2.82787	5.74256	-2.71746	0.0417154	0.102451	-3.60754
Tpd52l2	Non-matrisome	Non-matrisome	11.0183	16.9022	NA	13.9603	5.7715	1.44287	NA	3.60719	-10.3531	8.78373	-3.40879	0.0417359	0.102451	-3.23362
D0af10	Non-matrisome	Non-matrisome	3.14809	1.649	1.92383	2.24031	5.7715	NA	NA	5.7715	3.53485	3.12311	3.38977	0.0423272	0.103501	-3.23552
Ndc80	Non-matrisome	Non-matrisome	3.14809	1.649	1.92383	2.24031	5.7715	NA	NA	5.7715	3.53485	3.12311	3.38977	0.0423272	0.103501	-3.23552
Dpysl5	Non-matrisome	Non-matrisome	2.62341	1.23675	2.69337	2.18451	5.7715	NA	NA	5.7715	3.58876	3.08126	3.38945	0.0423372	0.103501	-3.23572
Pcsk1n	Non-matrisome	Non-matrisome	3.14809	2.88575	3.07813	3.03732	NA	5.7715	4.32862	5.05006	2.01251	3.84242	2.93598	0.042281	0.103501	-3.44109
Ogt	Non-matrisome	Non-matrisome	11.0183	10.7185	16.9297	12.8888	NA	NA	1.44287	1.44287	-11.4297	10.0274	-3.3867	0.0424234	0.103605	-3.23748
Plaa	Non-matrisome	Non-matrisome	10.4936	8.65725	9.61917	9.59002	5.7715	NA	NA	5.7715	-3.81487	8.63539	-3.38439	0.0424963	0.103677	-3.23897
Hnrnpc	Non-matrisome	Non-matrisome	68.7333	52.768	31.1661	50.8891	5.7715	25.9717	27.4146	19.7193	-31.1698	35.3042	-2.6972	0.0427393	0.104163	-3.63143
Elac2	Non-matrisome	Non-matrisome	3.14809	2.88575	3.4629	3.16558	5.7715	NA	NA	5.7715	2.60585	3.81706	3.37182	0.0428948	0.104329	-3.24706
Rpp38	Non-matrisome	Non-matrisome	3.14809	2.88575	3.4629	3.16558	5.7715	NA	NA	5.7715	2.60585	3.81706	3.37182	0.0428948	0.104329	-3.24706
Krt20	Non-matrisome	Non-matrisome	1.04936	0.8245	1.53907	1.13764	5.7715	4.32862	12.9859	7.69533	6.55769	4.41649	2.69242	0.0429851	0.104367	-3.63708
Usp47	Non-matrisome	Non-matrisome	19.4132	11.1307	14.2364	14.9268	NA	NA	1.44287	1.44287	-13.4867	11.5558	-3.36859	0.0429977	0.104367	-3.24914
Prpf38a	Non-matrisome	Non-matrisome	1.04936	2.88575	1.1543	1.69647	5.7715	NA	NA	5.7715	4.07242	2.71523	3.36429	0.0431355	0.104561	-3.25192
Zcchc8	Non-matrisome	Non-matrisome	5.7715	4.1225	5.38673	5.09358	NA	1.44287	NA	1.44287	-3.65462	4.1809	-3.36081	0.0432475	0.104654	-3.25417
Glb1	Non-matrisome	Non-matrisome	6.82086	7.00825	6.15627	6.66179	5.7715	1.44287	2.88575	3.36671	-3.29508	5.01425	-2.68503	0.0433678	0.104838	-3.64581
Nme4	Non-matrisome	Non-matrisome	8.91959	11.1307	10.0039	10.0181	5.7715	NA	NA	5.7715	-4.25102	8.95644	-3.35442	0.043454	0.10494	-3.25831
Acot2	Non-matrisome	Non-matrisome	6.82086	9.894	6.54103	7.75196	5.7715	2.88575	4.32862	4.32862	-3.42334	6.04029	-2.68097	0.0435799	0.105138	-3.65062
Man2a1	Non-matrisome	Non-matrisome	14.1664	18.5512	16.1602	16.2926	5.7715	11.543	12.9859	10.1001	-6.19249	13.1964	-2.67954	0.0436547	0.105212	-3.65231
Ybx1	Non-matrisome	Non-matrisome	34.629	60.1885	60.4084	51.742	5.7715	17.3145	38.9576	20.6812	-31.0607	36.2116	-2.67523	0.0438814	0.105379	-3.65741
Ppm1f	Non-matrisome	Non-matrisome	3.67277	5.35925	5.00197	4.678	5.7715	11.543	10.1001	9.13821	4.46021	6.9081	2.67553	0.0438656	0.105379	-3.65706
Ncapg	Non-matrisome	Non-matrisome	18.3639	12.3675	16.1602	15.6305	5.7715	NA	NA	5.7715	-9.848	13.1658	-3.34434	0.0437825	0.105379	-3.26487
I0	Non-matrisome	Non-matrisome	8.39491	NA	11.1582	9.77657	5.7715	NA	4.32862	5.05006	-4.72651	7.41332	-3.34042	0.0439107	0.105379	-3.28145
Erich5	Non-matrisome	Non-matrisome	7.34554	8.245	6.9258	7.50545	5.7715	2.88575	5.7715	4.80958	-2.69586	6.15752	-2.67403	0.0439449	0.105379	-3.65883
Lancl2	Non-matrisome	Non-matrisome	3.14809	2.06125	1.53907	2.24947	5.7715	NA	NA	5.7715	3.52565	3.12998	3.33129	0.044212	0.105577	-3.27337
Stx2	Non-matrisome	Non-matrisome	1.57405	1.23675	NA	1.4054	5.7715	NA	NA	5.7715	4.36678	2.86076	4.5462	0.0442448	0.105577	-3.15266
Elmo1	Non-matrisome	Non-matrisome	1.04936	NA	1.53907	1.29422	5.7715	NA	NA	5.7715	4.4763	2.78664	4.546	0.0442484	0.105577	-3.15272
Fn3krp	Non-matrisome	Non-matrisome	1.04936	NA	1.53907	1.29422	5.7715	NA	NA	5.7715	4.4763	2.78664	4.546	0.0442484	0.105577	-3.15272
Acin1	Non-matrisome	Non-matrisome	15.7405	8.65725	12.6973	12.365	5.7715	8.65725	1.44287	5.29054	-7.07446	8.82777	-2.66896	0.0442133	0.105577	-3.66483
Fhl3	Non-matrisome	Non-matrisome	1.57405	NA	1.1543	1.36417	5.7715	NA	NA	5.7715	4.40817	2.83328	4.53255	0.0444963	0.105687	-3.15639
Odr4	Non-matrisome	Non-matrisome	1.57405	NA	1.1543	1.36417	5.7715	NA	NA	5.7715	4.40817	2.83328	4.53255	0.0444963	0.105687	-3.15639
Parn	Non-matrisome	Non-matrisome	1.57405	NA	1.1543	1.36417	5.7715	NA	NA	5.7715	4.40817	2.83328	4.53255	0.0444963	0.105687	-3.15639
Syvn1	Non-matrisome	Non-matrisome	1.57405	NA	1.1543	1.36417	5.7715	NA	NA	5.7715	4.40817	2.83328	4.53255	0.0444963	0.105687	-3.15639
Ewsr1	Non-matrisome	Non-matrisome	7.34554	16.0777	13.4668	12.2967	5.7715	1.44287	7.21437	4.80958	-7.48713	8.55315	-2.66329	0.044516	0.105687	-3.67155
G0i2	Non-matrisome	Non-matrisome	46.6967	22.2615	24.2403	31.0662	5.7715	NA	5.7715	5.7715	-25.2769	20.9483	-2.88251	0.0446149	0.105816	-3.49376
Kif13b	Non-matrisome	Non-matrisome	6.82086	10.3062	10.3887	9.17194	5.7715	NA	2.88575	4.32862	-4.8456	7.23461	-2.88083	0.044691	0.105891	-3.49543
Srsf10	Non-matrisome	Non-matrisome	2.62341	2.4735	3.4629	2.85327	5.7715	NA	NA	5.7715	2.9173	3.58283	3.31349	0.0448067	0.10606	-3.28503
Rhog	Non-matrisome	Non-matrisome	4.19745	5.35925	4.23243	4.59638	NA	NA	1.44287	1.44287	-3.15497	3.808	-3.30701	0.0450258	0.106473	-3.2893
Atp5pf	Non-matrisome	Non-matrisome	4.19745	6.596	6.15627	5.64991	NA	2.88575	2.88575	2.88575	-2.76123	4.54424	-2.87206	0.0450884	0.106516	-3.50411
Mcam	Non-matrisome	Non-matrisome	9.44427	9.0695	10.7735	9.76241	5.7715	8.65725	7.21437	7.21437	-2.54804	8.48839	-2.64825	0.0453299	0.106743	-3.6894
Abracl	Non-matrisome	Non-matrisome	2.09873	3.298	1.92383	2.44019	5.7715	NA	NA	5.7715	3.32994	3.27301	3.29895	0.0453003	0.106743	-3.29461
Osbpl8	Non-matrisome	Non-matrisome	1.57405	NA	1.53907	1.55656	5.7715	NA	NA	5.7715	4.21501	2.96154	4.49141	0.0452668	0.106743	-3.16775
Nxn	Non-matrisome	Non-matrisome	10.4936	6.18375	6.54103	7.73947	5.7715	1.44287	1.44287	2.88575	-4.85372	5.31261	-2.64763	0.0453634	0.106743	-3.69013
Tst	Non-matrisome	Non-matrisome	8.39491	9.894	10.0039	9.43095	5.7715	NA	NA	5.7715	-3.66362	8.51608	-3.29137	0.04556	0.106994	-3.29962
Pip4p2	Non-matrisome	Non-matrisome	3.14809	1.649	1.53907	2.11205	5.7715	NA	NA	5.7715	3.66362	3.02691	3.29137	0.04556	0.106994	-3.29962
Ergic1	Non-matrisome	Non-matrisome	12.0677	17.7267	14.6211	14.8052	5.7715	NA	NA	5.7715	-9.04472	12.5468	-3.27295	0.0461997	0.10839	-3.31185
[truncated: 2,581 more rows]
